# Supplementary material for: Unveiling liver parasitism of Echinococcus granulosus mediated by protoscoleces-derived small extracellular vesicles
Source: Research Square preprint supplement (doi:10.21203/rs.3.rs-4575696/v1), 2024-06-28
Supplement: Supplementary file 1 [file 4926f8d41d7d827e3a8bf594.xlsx]

## Sheet: Table S1
Table S1 related to Fig. 1. Proteomic quantification of small extracellular vesicles from strobilar worms
Group_ID	Protein_ID	Protein_Qscore	Protein_FDR	Protein_Mass	PeptideSeqs	PepIsUnique	Unique_Peptide_Num	Unique_Spectra_Num	Coverage	Peptide_Query	Sameset	Description	Abundance	iBAQ
327_1	tr|W6U326|W6U326_ECHGR	23.8877	NA	21785.5	AWGVVQGR;HIQANPAPAMR;KEIVPFR;KSAEMILHLLHNAFSNGVNK;SAEMILHLLHNAFSNGVNK;VAATAAQPVK	1;1;1;1;1;1	6	7	0.2932	8760;28386;9629;62717;60351;60350;13385	-	60S ribosomal protein L17 OS=Echinococcus granulosus OX=6210 GN=EGR_09626 PE=3 SV=1	1.90628e+06	136163
1592_1	tr|U6IWH4|U6IWH4_ECHGR	3.69757	NA	28792.8	GTHETAAVAILK	1	1	1	0.0474	28720	-	Pre mRNA splicing factor cwc 21 OS=Echinococcus granulosus OX=6210 GN=EGR_01598 PE=4 SV=1	0	0
1555_1	tr|W6UN17|W6UN17_ECHGR	5.25985	NA	37635.3	AITSSGSELGNK	1	1	1	0.0365	25652	tr|A0A068WGQ1|A0A068WGQ1_ECHGR	Adenylate kinase 2 OS=Echinococcus granulosus OX=6210 GN=EGR_02376 PE=3 SV=1	246119	9844.78
329_1	tr|W6UW09|W6UW09_ECHGR	2.78177	NA	32437.7	IFVGALK	1	1	1	0.0238	2402	tr|U6IZP5|U6IZP5_ECHGR	Heterogeneous nuclear ribonucleoprotein A2 OS=Echinococcus granulosus OX=6210 GN=EGR_00075 PE=4 SV=1	0	0
1594_1	tr|U6JAU0|U6JAU0_ECHGR	21.244	NA	10891.4	DYIAQQLGQEPSEVK;QIVNGTNHFLK;QLLTPVIK;VASVGDPLTYF;VEHDGNCWHVR;VHEALPCYGGK	1;1;1;1;1;1	6	13	0.6837	50899;31424;32376;32374;31419;32372;10903;25982;39901;39900;39902;29843;29846	-	Cystatin B Stefin B OS=Echinococcus granulosus OX=6210 GN=EGR_08406 PE=3 SV=1	3.81391e+06	423768
1746_1	tr|W6UPP5|W6UPP5_ECHGR	2.22433	NA	64751.3	TLLQWELK	1	1	1	0.0137	17212	-	Uncharacterized protein OS=Echinococcus granulosus OX=6210 GN=EGR_02202 PE=4 SV=1	62734.6	2163.26
1557_1	tr|W6UI26|W6UI26_ECHGR	6.3215	NA	25725	LEDEEER;NVLVDCIYTTQGK	1;1	2	2	0.0877	11330;44900	-	Uncharacterized protein OS=Echinococcus granulosus OX=6210 GN=EGR_04536 PE=4 SV=1	2.44027e+06	187713
1533_1	tr|W6UGZ7|W6UGZ7_ECHGR	75.3248	NA	42279.3	AHGLFLILHLHPHASAK;CQDIVIREDK;DAADTSGMTGR;DLSGFVDGTANPADETDR;DLSGFVDGTANPADETDRIEAAVSETTGGSYVLTQR;EDKAHGLFLILHLHPHASAK;GAVQSTEETYGFTYR;HSLPYGIASGECGLFFVAYTK;IEDGLFHFTRPLTGAYFYSPSR;IEPIAPTSHLGR;IQAHVDR;IYPDADKNGVEPFPFSER;MAGLSHDR;SPQIFDWALDR;TMEANVGR;VAQMPSTGGDILVHAVCGEQGK;WLHDMK	1;1;1;1;1;1;1;1;1;1;1;1;1;1;1;1;1	17	27	0.5803	54931;54932;54930;32603;32597;20214;55320;73385;73386;62893;50987;64322;64319;67530;33541;33540;6931;60113;60112;60114;60115;9480;36702;9052;63180;63182;6474	tr|A0A068WQ63|A0A068WQ63_ECHGR	Uncharacterized protein OS=Echinococcus granulosus OX=6210 GN=EGR_07721 PE=3 SV=1	3.0801e+07	1.10004e+06
136_2	tr|A0A068X1D4|A0A068X1D4_ECHGR	10.5197	NA	43706.8	GKEPEITILDGK;NVSPGVDEESSER;QDAVLGELTQR;QVFFQR;WLDYEPK;YLESEPPPLPAGR	1;1;0;0;0;0	2	4	0.1566	34034;34033;34031;39715;29788;6221;13106;40818	-	Uncharacterized protein OS=Echinococcus granulosus OX=6210 GN=EgrG_000411500 PE=4 SV=1	1.48271e+06	87218.5
1329_1	tr|W6V7Y4|W6V7Y4_ECHGR	13.2027	NA	28774	FFFDIR;LHISQVTDLHR;LTMLIDALK	1;1;1	3	3	0.1048	7278;35167;16542	tr|A0A068WH95|A0A068WH95_ECHGR	Uncharacterized protein OS=Echinococcus granulosus OX=6210 GN=EGR_02395 PE=3 SV=1	540474	30026.4
136_1	tr|W6UDH4|W6UDH4_ECHGR	5.25985	NA	31288.9	QDAVLGELTQR;QVFFQR;TFVWLMVENIPATLQTQSLGFK;WLDYEPK;YLESEPPPLPAGR	0;0;1;0;0	1	2	0.2122	29788;6221;66964;66965;13106;40818	-	Sorbin OS=Echinococcus granulosus OX=6210 GN=EGR_08742 PE=4 SV=1	0	0
1551_1	tr|W6UU76|W6UU76_ECHGR	31.0665	NA	9074.54	AKWEAWNGR;KVQALLASTK;LYLYGLYK;QATVGDVNTAKPGMLDVK;SEAEQEYVK;SEAEQEYVKK;WEAWNGR;WEAWNGRK	1;1;1;1;1;1;1;1	8	25	0.6707	22717;18805;18803;18804;17318;54509;54055;54544;54083;54082;54545;54507;54546;54873;54053;20296;20295;20297;28697;28696;11331;11332;11333;18041;18040	-	Acyl-CoA-binding protein OS=Echinococcus granulosus OX=6210 GN=EGR_00147 PE=4 SV=1	6.57705e+07	1.09618e+07
819_1	tr|A0A068WLI3|A0A068WLI3_ECHGR	7.88428	NA	19924.1	AVFTGYR;ETEFYMGK;IDGVNTAK	1;1;1	3	3	0.1322	5599;15914;5873	tr|W6UG03|W6UG03_ECHGR	60S ribosomal protein L35a OS=Echinococcus granulosus OX=6210 GN=EgrG_000458500 PE=3 SV=1	4.79971e+06	479971
1553_1	tr|W6US96|W6US96_ECHGR	2.67064	NA	41909.4	FIQPSLR	1	1	1	0.0189	8210	tr|A0A068WTH5|A0A068WTH5_ECHGR	Tetratricopeptide repeat protein OS=Echinococcus granulosus OX=6210 GN=EGR_03912 PE=3 SV=1	3.86611e+06	148697
138_1	tr|A0A068WGF2|A0A068WGF2_ECHGR	15.1346	NA	95295.6	AATTVEELGDR;KHDINLVFGR;LSELLDWK;NLGVYYSR	1;1;1;1	4	4	0.0445	25532;27948;15890;14203	tr|W6UUZ1|W6UUZ1_ECHGR	Glycogen [starch] synthase OS=Echinococcus granulosus OX=6210 GN=EgrG_001029800 PE=3 SV=1	5.10009e+06	121431
59_1	tr|U6IUA5|U6IUA5_ECHGR	88.9579	NA	58387.3	AEDSNTHR;ALSNSYDFFMR;ASPVAIEGCFPDSVELHITK;EAGWDVEEFADLSTPAEK;ESIVDVYGVVR;FQYFNSQACLAQSPQLYK;GEEIMSGAQR;GGDVQVAGDVEK;KGGDVQVAGDVEK;LCFIVLR;LDDPEEDFSK;LEFAEGIR;QMAIAADFGR;QYLLQCVLSSGEK;QYTAEIEAVNK;TIQSYIDSFR;VEHGVVHLFMEYLDNHGFTMIHTPK;VHDPEFLTER;VTMLFLGLDNIR;YGCPPHAGGGIGLER	1;1;1;1;1;1;1;1;1;1;1;1;1;1;1;1;1;1;1;1	20	31	0.4669	11921;36837;36904;61855;58131;58130;30226;62212;62231;62211;62230;19969;26299;34126;34127;11475;27663;12247;20108;44748;32062;29775;70643;70642;70644;30622;30623;30616;39081;46271;46274	-	Aspartate--tRNA ligase, cytoplasmic OS=Echinococcus granulosus OX=6210 GN=EGR_00331 PE=3 SV=1	3.35039e+07	957254
568_1	tr|W6U3Q1|W6U3Q1_ECHGR	34.5037	NA	53804.1	AGVNNSASEFHNAGATDESALVR;ALFDLK;ELAPLANEADSTQISR;IELDLTK;SFGWMVLQDVK;SIFPEVDGK;VATEAPTAAPTTK;VGFLEVGSETLVDK	1;1;1;1;1;1;1;1	8	8	0.2016	64311;399;51165;6618;34644;15263;31606;44035	tr|A0A068X461|A0A068X461_ECHGR	3-hydroxy-3-methylglutaryl coenzyme A synthase OS=Echinococcus granulosus OX=6210 GN=EGR_09386 PE=3 SV=1	1.81329e+06	67159.1
1265_1	tr|W6UTI3|W6UTI3_ECHGR	28.6982	NA	38358.6	IPVTLQALSYGSWLMEDNVR;ITVLYK;LLEQHYGINDK;LLNISMHNDMSVR;LNLPETEAYR;QTLTYNGHILEDGK;VNLSLPLDFEPNFK	1;1;1;1;1;1;1	7	11	0.2619	63892;63893;1813;35754;35793;35752;45781;28384;47815;47816;48905	tr|A0A068WSK5|A0A068WSK5_ECHGR	Uncharacterized protein OS=Echinococcus granulosus OX=6210 GN=EGR_08452 PE=4 SV=1	2.08231e+06	86762.8
50_1	tr|W6U6K8|W6U6K8_ECHGR	62.8014	NA	59142.6	AIQLDYNAAHDHLVSAHR;DALHPYFQLTQAIHAGDLGR;DGVIEAVINR;DVDLLTLEDIRDQIR;FNHVLK;IFLTDVAAK;ISLSYSK;KAPQQTASGFK;LNTVVELLLGELPDR;LQLDSSEDAEYIVAK;NNHDCQAVLINLLLR;NYLHYNLHDQASK;STQQPVSEELSADK;TYTLILR;VSVEGDAAK	1;1;1;1;1;1;1;1;1;1;1;1;1;1;1	15	18	0.3594	59100;59103;59102;62704;20483;53704;2808;14547;4796;25609;50193;50188;53145;48171;48172;45265;9182;8945	tr|A0A068WXJ2|A0A068WXJ2_ECHGR	26S proteasome non-ATPase regulatory subunit 3 OS=Echinococcus granulosus OX=6210 GN=EGR_08284 PE=3 SV=1	2.67937e+07	705097
1703_1	tr|U6IYR8|U6IYR8_ECHGR	7.81011	NA	32999.8	FGHLELSGPAHVR;SVSGVDPVLR	1;1	2	3	0.0752	40463;40462;17093	-	Proteasome inhibitor OS=Echinococcus granulosus OX=6210 GN=EGR_02172 PE=4 SV=1	1.41338e+06	94225.5
535_1	tr|W6UG14|W6UG14_ECHGR	25.7069	NA	99494.9	FLYDLVQR;LFSSLVR;LIQLLESPVFAR;LLASLSLDER;QITSLQWIR;SDKVDFNALLVHFR;YAACEALYNILK	1;1;1;1;1;1;1	7	7	0.0809	18424;6080;38770;22608;24453;49682;40946	-	Protein VAC14 homolog OS=Echinococcus granulosus OX=6210 GN=EGR_08113 PE=3 SV=1	827923	16558.5
1740_1	tr|U6IYD7|U6IYD7_ECHGR	32.938	NA	31501.7	AAHELLVTQIYNLR;CITDWLR;ELVQLDKEITQLQK;IETFSTASTEIIEK;KCITDWLR;LSCSLADLK;LSCSLADLKK;SGNSSQSEISLR	1;1;1;1;1;1;1;1	8	9	0.2581	49149;13805;50324;47263;20950;16032;23783;23784;32058	-	E3 ubiquitin-protein ligase RNF8 OS=Echinococcus granulosus OX=6210 GN=EGR_01501 PE=4 SV=1	1.58537e+07	720624
1742_1	tr|U6JJP6|U6JJP6_ECHGR	58.2062	NA	42235.5	AGFAGEDGPISVFPSIIGRPK;EHLCYVAVDPEEEFKR;EIYGIHEALHHVIEGCEIDLR;FQSPEILFSPQLIGR;GEYEEMGPR;GVLTLQYPVENGVIK;IWYHTFYNELR;KPEYFVGHAAQQMR;LQNEVNHLAAK;NVVLSGGSTMFEGLIER;NWDDIER;TTGAVLDIGDGATHIVPIFEGHGLNHLILR;VKVNGLEK	1;1;1;1;1;1;1;1;1;1;1;1;1	13	17	0.5214	60812;58873;66722;51529;19304;48843;46324;49701;30281;30283;30466;53570;12954;71447;71445;71446;9571	-	Actin OS=Echinococcus granulosus OX=6210 GN=EGR_06943 PE=3 SV=1	6.20149e+06	248059
537_1	tr|W6U4W3|W6U4W3_ECHGR	39.8309	NA	28279.6	DAFHLR;DVHRPQFIEAFR;ENFQEMR;GAYGKPLGTVAR;GKDVHRPQFIEAFR;IAVSQNWGFTK;LQYDGSNVK;MLSCAGADR;VNIGQVIMSVR;YFPNHGPLTVWK	1;1;1;1;1;1;1;1;1;1	10	13	0.3699	2850;45085;13260;27434;27433;50743;50745;31192;16829;14677;29025;42445;42444	tr|A0A068WX93|A0A068WX93_ECHGR	60S ribosomal protein L10 OS=Echinococcus granulosus OX=6210 GN=EGR_08946 PE=4 SV=1	7.31941e+07	3.85232e+06
1051_1	tr|A0A068WVY0|A0A068WVY0_ECHGR	65.3136	NA	66529.2	CTQFVYGGCR;FDTLDAICELPQDTGPCK;FFFDSEAGK;GNANNFQSK;GNCEAYQQK;GNCYALIR;ISIPIPSTSVK;KLDQCVEFTFGGCGGNK;LPQEVGPCR;NNFETLEECEK;RWAFDTSK;SETVVSPVGGVGENAVCYLPR;SGSIDTLVCHLPQDR;SQPGLCSLPPAQGPCK;WAFDTSK;WYYDVAK;YYYDTTSGK	1;1;1;1;1;1;1;1;1;1;1;1;1;1;1;1;1	17	25	0.3071	30936;60064;60063;18030;14679;21351;21350;13962;14010;24248;24242;56358;18548;40079;16184;62163;62181;50674;50673;50629;50627;50628;7819;12769;21302	-	Papilin OS=Echinococcus granulosus OX=6210 GN=EgrG_001181950 PE=4 SV=1	4.23298e+07	1.14405e+06
531_5	tr|A0A068WG57|A0A068WG57_ECHGR	213.121	NA	139342	AASFLPDLK;AFTLISFSAQGVGR;ALEQAGAGR;ALPEIEALAR;ASGSLISLLSSSVPEIQSGIGNR;DLSPNWIR;DNIAFGDCSR;DVEFSYPDRK;DVQEALSQTIAK;EADVIVVMK;ELSMSDIIEAAK;FYDADNFEKLEEGVFMDGR;HDEFDNEMEK;IEFKDVEFSYPDR;ILLLDEATSALDTR;KESQLAAFR;KIECGPPGALLQAR;KVEVVAEFDDDFK;KVYAIIDR;KYLAGVSVAQEALSAHR;LAADAPSLEK;LAVNMIFLGFMR;LDEIIEEGESEPK;LEEGVFMDGR;LLFFDSLIR;LSTVEACDFVVVVDR;LYDPQDGEILVDGESIQNLDVGWLR;MGDLHATMDEVIQAAQLAEASEFIYR;MIATFVQR…	1;1;1;1;1;1;1;1;1;1;1;1;1;1;0;1;1;1;1;1;1;1;1;1;1;1;1;1;1;1;1;1;1;1;1;1;1;1;1;1;1;1;1;1;1;1;1;1;1;1;1	50	64	0.4821	13716;42168;8751;20328;63525;15731;25062;31465;31466;34204;15894;34464;63688;33639;49235;45827;45826;45831;18182;18183;44854;46280;46278;14551;53348;16380;40067;43789;24937;23093;50994;69994;70384;13928;15800;49406;19662;19660;31780;31777;54558;17540;16777;59852;59853;63124;62853;63125;62852;14264;62292;62291;72785;72784;26169;17624;3415;12970;59474;66532;66533;10839;60321;60320;10224;49959;49958	tr|W6UVB8|W6UVB8_ECHGR	ATP binding cassette subfamily B MDR:TAP OS=Echinococcus granulosus OX=6210 GN=EGR_00511 PE=4 SV=1	7.22683e+07	1.00373e+06
531_4	tr|A0A068X178|A0A068X178_ECHGR	188.924	NA	128338	AGTSVALVGQSGCGK;AIISQEEIHGR;ANSIASEALGAIR;AYSAISFAAQQLGYVAAFAPDSR;CVESGSPATLMEAR;DADSIIVVNK;DLAPTWIR;ELDLVWFR;EQLGVVSQEPVLFAGTVAENIR;FYDANDGR;GAGLAFESLSAAK;GAYYSLHNINAK;GDIQFENIHFSYPTR;GDIQFENIHFSYPTRK;GSVSFNNVHFR;IFAIINR;IFAIINRVPNLQPDEGEFPAVPFK;ILLLDEATSALDTR;KSVQVLNGLSLSIQAGQTVAIVGASGSGK;LGSLNATNEEVEEAAK;LLVLDEATAALDNESER;LMESGSVTLVGIFR;LTEGVEK;LTTVQNCDCIVVLENGR;MALVHEFVSK;QANAHSFITNMPQGYDTPVG…	1;1;1;1;1;1;1;1;1;1;1;1;1;1;1;1;1;0;1;1;1;1;1;1;1;1;1;1;1;1;1;1;1;1;1;1;1;1;1;0;1;1;1	41	71	0.42	39063;31297;31299;31298;32443;32488;65504;44734;19746;14217;20002;64831;64829;13517;29365;36929;36858;36854;36922;36925;53962;53961;57235;31962;32006;32007;32002;7432;68933;45827;45826;45831;69465;50054;50055;54862;54867;54866;54863;44804;3717;58084;58085;58089;58088;58082;58083;25493;25491;65440;65439;65468;31967;35566;49572;18725;17867;68210;17712;47475;47473;8552;10018;23241;55435;55437;55436;…	-	ATP binding cassette subfamily B MDR:TAP OS=Echinococcus granulosus OX=6210 GN=EgrG_000931700 PE=4 SV=1	2.74993e+08	4.6609e+06
1590_1	tr|U6JCE8|U6JCE8_ECHGR	46.5563	NA	23216.8	ESIQYMVMASR;IEEVMGDFEK;IYAEDSIR;IYAEDSIRK;QPSLEDVVFDLK;QVAEENGLEVEAAMAGAQVPTDSIAHPISGER;RSQADDALTER;SQADDALTER;TFTDLDVR;TSTVEGSMNTVMATSAPENEIQSLIK	1;1;1;1;1;1;1;1;1;1	10	17	0.5694	34887;27787;13970;21147;21148;38088;38958;72017;71948;72018;72019;31810;31808;21856;13969;69208;69207	-	Charged multivesicular body protein OS=Echinococcus granulosus OX=6210 GN=EGR_01017 PE=3 SV=1	1.03208e+08	8.60068e+06
531_1	tr|A0A068X5K1|A0A068X5K1_ECHGR	31.0299	NA	27548.2	ALVRDPQLLVLDEATAALDNESER;ENIAYGLNYR;FYDPSNTDITEGIILDGVNAR;QANAHDFVCNLPEQYETR;QIGVVSQEPNLLDLTIR;SVALVGQSGCGK;TCLVVAHR;TLAPNWIR;VVQAALDEAMR	1;1;1;1;1;1;1;0;0	7	7	0.5099	68160;28843;64220;62191;55763;25596;13371;14170;28220;28222;29191	tr|W6U6N5|W6U6N5_ECHGR	Multidrug resistance protein 1 OS=Echinococcus granulosus OX=6210 GN=EgrG_000160300 PE=4 SV=1	8.22688e+06	514180
729_1	tr|W6UWF8|W6UWF8_ECHGR	18.2629	NA	183568	ADCTVQSFK;IGQILDAEYTSR;LLSLLHK;NIQLLR;SQITADLTDYLK	1;1;1;1;1	5	5	0.0276	18530;37712;6200;2768;37809	-	Uncharacterized protein OS=Echinococcus granulosus OX=6210 GN=EGR_02263 PE=3 SV=1	1.23875e+06	15293.3
531_3	tr|A0A068W973|A0A068W973_ECHGR	107.044	NA	132207	EANVHEFVEGLPEGYETSVGAR;EGATFEEIETAAK;ENIAYGDNSR;ENIELGR;FYDPSEGQVLIDGHDIR;IGAGQTIAIVGPSGSGK;ILLLDEATSALDTHSER;IPEIDKEESGTK;KFNYTVQAGNSVALVGASGCGK;LADAHDFIIK;LDIIHGDIEFR;LLLLDEATSALDNESER;LQFGVVSQEPVLFAATVK;LYDVSPHGPGSGIFIDGHDIR;QEPGWFDEVANQPGVLTAR;SLLFNAIIK;STILQLVQR;TFSAFNFGAQGITR;TLAPNWIR;TSLVVAHR;TVFAFGLENHFYNK;TVFAFIGQEK;TVIMVAHR;VAALTPDFK;VAALTPDFKK	1;1;1;1;1;1;1;1;1;1;1;1;1;1;1;1;1;1;0;0;1;1;1;1;1	23	30	0.2676	65284;39254;24000;6540;57453;57452;45008;55438;36553;36554;62794;24289;24291;35636;55584;56771;56772;63162;60786;16617;16671;18722;18719;45174;14170;9304;50356;24101;11789;11790;13717;20831	tr|W6V0Y0|W6V0Y0_ECHGR	ATP binding cassette subfamily B MDR:TAP OS=Echinococcus granulosus OX=6210 GN=EgrG_000901000 PE=4 SV=1	2.72281e+07	477687
531_2	tr|W6V269|W6V269_ECHGR	92.6862	NA	140626	AAASIFLIIDR;DLNVAWLR;EMGTHSELLDK;ENIAYGSLK;FYDAVHGSILLDDVDIR;GAFYEIHSFGVGGQ;GEPTMEEIIDAAK;GPGSGIFLDGR;KPTVLLLDEATSALDNK;KTLATIQR;LATEVQSLHR;NFSLTVNPGETVAIVGPSGSGK;NVSFSYPTRPDVQVLK;QEVAWFDRPENQAGILTAR;RVESGSPQALLQQK;SLAPAWIR;SLPEIEFFANAK;STLLQLIQR;TSLVVAHR;TVFAFGCQER;TVIMIAHR;VLLLDEATSALDVDSER	1;1;1;1;1;1;1;1;1;1;1;1;1;1;1;1;1;1;0;1;1;1	21	26	0.2123	27437;15012;31701;15437;57121;42912;39676;19877;54091;54092;12035;25040;25043;61135;61134;54671;62376;46301;46302;11021;37711;19632;9304;28937;12588;54592;54593	-	Multidrug resistance protein OS=Echinococcus granulosus OX=6210 GN=EGR_00326 PE=4 SV=1	4.00648e+07	635950
1705_1	tr|W6TYR4|W6TYR4_ECHGR	3.57287	NA	41728.8	YSFTFELR	1	1	1	0.0217	19024	-	Carboxypeptidase A1 OS=Echinococcus granulosus OX=6210 GN=EGR_11281 PE=3 SV=1	85260.9	4736.72
1165_1	tr|U6J7Z4|U6J7Z4_ECHGR	5.25985	NA	39181.8	VIGLLDHLDAQVALTPLEVNPQR	1	1	1	0.065	66837	-	Serine/threonine-protein phosphatase 2A activator OS=Echinococcus granulosus OX=6210 GN=EGR_06062 PE=3 SV=1	0	0
1531_1	tr|U6JBG9|U6JBG9_ECHGR	7.11661	NA	10433.5	KTCAACGYPSPR;TCAACGYPSPR	1;1	2	2	0.1319	37781;30439	-	Ribosomal protein L37 OS=Echinococcus granulosus OX=6210 GN=EGR_04872 PE=3 SV=1	979231	163205
1411_1	tr|A0A068WIC1|A0A068WIC1_ECHGR	44.5497	NA	42122.2	DHWGFR;FLSQYAK;IALSPSAPLKDQISAAHK;ILYGGWLK;KYAMVIVSPILER;NITDEDAR;TFGHFFGSSYVTGPDGVR;VAGYAFER;VDLYAK;VGDFNESTYYMESNLGHPVFDTIYGK;VGTEEFPNEFTSGDGKPSHR;VPWCEFAESAENGPTTK	1;1;1;1;1;1;1;1;1;1;1;1	12	15	0.4111	5850;7925;54614;13085;45302;45300;12174;56718;56719;10934;481;70827;62174;62176;56530	tr|W6UQN5|W6UQN5_ECHGR	Beta ureidopropionase OS=Echinococcus granulosus OX=6210 GN=EgrG_000482700 PE=4 SV=1	1.15345e+07	524297
939_1	tr|W6UWQ5|W6UWQ5_ECHGR	2.89329	NA	55707.7	SVTLAYQR	1	1	1	0.0152	12389	tr|A0A068WQD2|A0A068WQD2_ECHGR;tr|U6JHR5|U6JHR5_ECHGR	Riboflavin transporter OS=Echinococcus granulosus OX=6210 GN=EGR_07189 PE=3 SV=1	44924.5	3208.89
1413_1	tr|U6IZR7|U6IZR7_ECHGR	16.9284	NA	22821.2	LFYQTVEEQK;LSLWTSNWQNK;VTTFNTVER;WLINVPSLNEVNR	1;1;1;1	4	4	0.2216	33157;38283;19279;46763	-	Eukaryotic translation initiation factor 4E OS=Echinococcus granulosus OX=6210 GN=EGR_00049 PE=3 SV=1	4.27963e+06	427963
1707_1	tr|A0A068W6R7|A0A068W6R7_ECHGR	2.86316	NA	8943.58	TPNSASPGGSNSKLDK	1	1	1	0.1882	47026	-	Expressed protein OS=Echinococcus granulosus OX=6210 GN=EgrG_000743200 PE=4 SV=1	1.18458e+06	236916
1701_1	tr|A0A068WNU1|A0A068WNU1_ECHGR	30.5177	NA	26924.3	ALDLSSNSIQNLDPWIGAFPGLK;ALQELPAYAK;DIPLDLLDLSK;KTGSLQLSNLK;MLSLTSSHSVVNFGSLR;TGSLQLSNLK	1;1;1;1;1;1	6	7	0.2963	66132;21726;30592;27385;27384;54257;18943	tr|W6UFQ5|W6UFQ5_ECHGR	Leucine rich repeat containing protein 57 OS=Echinococcus granulosus OX=6210 GN=EgrG_000187400 PE=4 SV=1	1.29144e+06	99341.7
1167_1	tr|W6UEF5|W6UEF5_ECHGR	2.83587	NA	65499	LNSVFSR	1	1	1	0.0125	6122	-	Uncharacterized protein OS=Echinococcus granulosus OX=6210 GN=EGR_05892 PE=4 SV=1	716197	28647.9
54_1	tr|A0A068WIT3|A0A068WIT3_ECHGR	2.36998	NA	508823	ISPLLQEAR	1	1	1	0.002	16980	-	Cytoplasmic dynein 2 heavy chain 1 OS=Echinococcus granulosus OX=6210 GN=EgrG_001028600 PE=3 SV=1	3.95435e+07	142756
1169_1	tr|A0A068WNY5|A0A068WNY5_ECHGR	2.19911	NA	82025.8	YLETAK	1	1	1	0.0082	1216	tr|A0A068WP30|A0A068WP30_ECHGR;tr|W6UT57|W6UT57_ECHGR	Protein 4.1 OS=Echinococcus granulosus OX=6210 GN=EgrG_000468600.1 PE=4 SV=1	366550	7798.94
52_1	tr|A0A068WE99|A0A068WE99_ECHGR	11.9552	NA	94692.5	FVAAEIENR;HQIDSPDVVLPR;HSGEQLFSDVCEYR;KGDYNLVIYAR	1;1;1;1	4	4	0.0537	18098;38251;51405;34768	-	Ubiquitin protein ligase BRE1 OS=Echinococcus granulosus OX=6210 GN=EgrG_000836300 PE=4 SV=1	1.76349e+06	41987.9
1558_1	tr|A0A068WE34|A0A068WE34_ECHGR	8.96024	NA	45867.2	SSFADSDFIEK;VEVSEEEFEK;VSLECFLHR	1;1;1	3	3	0.0748	30777;29510;25486	-	Sorting nexin 2 OS=Echinococcus granulosus OX=6210 GN=EgrG_000828200 PE=3 SV=1	700075	25002.7
1182_1	tr|W6UPE3|W6UPE3_ECHGR	14.0325	NA	292730	FPVVVWQHMETR;HLLVELR;SLLSMTLASLR;VIFIGVPK	1;1;1;1	4	4	0.0143	45741;9185;27525;8793	tr|A0A068W940|A0A068W940_ECHGR	Myotubularin-related protein OS=Echinococcus granulosus OX=6210 GN=EGR_01592 PE=3 SV=1	155991	1209.24
719_1	tr|A0A068WA17|A0A068WA17_ECHGR	5.67516	NA	54319	IFYLADR;VNVVEELNR	1;1	2	2	0.0321	10049;19600	tr|W6UWY2|W6UWY2_ECHGR	Expressed conserved protein OS=Echinococcus granulosus OX=6210 GN=EGR_02106 PE=4 SV=1	2.39117e+06	95646.6
209_2	tr|U6ITN7|U6ITN7_ECHGR	22.7867	NA	36578.6	AVLPPEVGGEGEPLEDLIQANK;DFLHDYK;DFLHDYKDYNANVMGK;FLEFYGK;FTQEAVPLRPR;IIFYNEGK;LDNFCTLSTMK;MLWCGSDIEK;NIPAHVEALR;QVIKDPNVMK;RIIFYNEGK;SIGDIVWGTPLDLK;TIFMIASDPR;TIIGGTVVLLDFTGGTSK	1;0;0;1;1;1;0;1;0;0;1;0;0;0	6	13	0.4596	63569;63567;63566;63568;63570;63571;12368;56684;10397;34866;14869;14913;35739;35786;30371;22831;26183;26181;25103;24103;24102;45044;45043;24820;52757;52756	-	Alpha tocopherol transfer protein OS=Echinococcus granulosus OX=6210 GN=EGR_06006 PE=4 SV=1	2.03232e+07	846800
209_1	tr|A0A068W6X5|A0A068W6X5_ECHGR	7.72759	NA	36790.8	DFLHDYK;DFLHDYKDYNANVMGK;FHEFYGK;HVIIYNEGK;LDNFCTLSTMK;NIPAHVEALR;QVIKDPNVMK;SIGDIVWGTPLDLK;TIFMIASDPR;TIIGGTVVLLDFTGGTSK	0;0;1;1;0;0;0;0;0;0	2	2	0.3261	12368;56684;11814;19674;35739;35786;22831;26183;26181;25103;45044;45043;24820;52757;52756	-	Alpha tocopherol transfer protein OS=Echinococcus granulosus OX=6210 GN=EgrG_002014400 PE=4 SV=1	1.92431e+06	74011.9
1180_1	tr|W6UQR0|W6UQR0_ECHGR	2.099	NA	185662	VVVLWNTRLR	1	1	1	0.0059	31503	tr|A0A068W987|A0A068W987_ECHGR	Son of sevenless OS=Echinococcus granulosus OX=6210 GN=EGR_01640 PE=4 SV=1	119098	1631.48
1161_2	tr|W6UNW0|W6UNW0_ECHGR	5.10083	NA	319477	AALQLLADRPGLLDGLPK;AGFEAFTQLSGVR;AIIDEASEALVAQLR;DCLITLLEK;IAAHLADFTPR;LASASDDADHGASTLGLSR;SAALVPDK;SAALVPDKGASK;SIYHHIGIPR;TELALLPR	0;0;0;0;0;0;1;1;0;0	2	2	0.0398	54933;38583;48087;21818;28783;54493;4946;24380;27580;10967	-	DnaJ subfamily C member protein OS=Echinococcus granulosus OX=6210 GN=EGR_10071 PE=4 SV=1	1.56397e+06	9961.6
1161_1	tr|A0A068WUS3|A0A068WUS3_ECHGR	3.34359	NA	289286	AALQLLADRPGLLDGLPK;AGFEAFTQLSGVR;AIIDEASEALVAQLR;DCLITLLEK;IAAHLADFTPR;LASASDDADHGASTLGLSR;SIYHHIGIPR;TDILTDMLR;TELALLPR	0;0;0;0;0;0;0;1;0	1	1	0.043	54933;38583;48087;21818;28783;54493;27580;19992;10967	-	DnaJ subfamily C 3 OS=Echinococcus granulosus OX=6210 GN=EgrG_000345600 PE=4 SV=1	186661	1305.32
1415_1	tr|W6UTA2|W6UTA2_ECHGR	5.25985	NA	8469.16	AAQAANVSGCR	1	1	1	0.141	21767	-	Uncharacterized protein OS=Echinococcus granulosus OX=6210 GN=EGR_03661 PE=4 SV=1	0	0
1599_1	tr|W6V761|W6V761_ECHGR	2.41938	NA	105541	LEEIAGK	1	1	1	0.0075	2914	tr|A0A068WIZ7|A0A068WIZ7_ECHGR	PRP6 homolog OS=Echinococcus granulosus OX=6210 GN=EGR_02732 PE=4 SV=1	483764	7930.56
1163_1	tr|A0A068WEV9|A0A068WEV9_ECHGR	2.92498	NA	27974.6	KCETNILPIEK	1	1	2	0.0437	36523;36522	-	Expressed conserved protein OS=Echinococcus granulosus OX=6210 GN=EgrG_000968300 PE=4 SV=1	0	0
715_1	tr|W6UWL7|W6UWL7_ECHGR	2.22033	NA	26484	IGLTHGHQSVPWGSR	1	1	1	0.0636	48868	tr|A0A068WCS9|A0A068WCS9_ECHGR	Vacuolar protein sorting-associated protein 29 OS=Echinococcus granulosus OX=6210 GN=EGR_00305 PE=3 SV=1	285143	19009.5
1417_1	tr|A0A068WZE9|A0A068WZE9_ECHGR	14.3307	NA	40229.3	EASAAEAPAR;GSASTNPDALLGGLFAELR;LISSTLELAQVLQR;YLECETWSGKPVVVPSEYAR	1;1;1;0	3	4	0.1712	14254;55590;47317;47318;65022;65021	-	Sorbin OS=Echinococcus granulosus OX=6210 GN=EgrG_000418300 PE=4 SV=1	185875	8448.85
1417_2	tr|A0A068WUD7|A0A068WUD7_ECHGR	16.7909	NA	22297.1	HLESEPASLPVDR;ISSTLELAQVLQR;RISSTLELAQVLQR;WLDFDPK;YLECETWSGKPVVVPSEYAR	1;1;1;1;0	4	5	0.2673	41968;41969;42403;48446;11395;65022;65021	-	Sorbin OS=Echinococcus granulosus OX=6210 GN=EgrG_000411400 PE=4 SV=1	5.68882e+06	711103
1497_1	tr|U6J3T1|U6J3T1_ECHGR	21.6844	NA	18486.7	ELEVDHIIVGSR;FYSENLHR;GDDTIIFLHVIEPNLK;KEDSEIHETTSQLQK;YLLPIDTSENCK	1;1;1;1;1	5	10	0.3772	37765;37764;19200;19198;53973;53974;52592;52590;52591;42106	-	Universal stress protein OS=Echinococcus granulosus OX=6210 GN=EGR_06696 PE=4 SV=1	7.63648e+06	763648
1202_1	tr|W6USQ1|W6USQ1_ECHGR	4.96842	NA	21473.1	LLLDLPPLGK;WFETIR	1;1	2	2	0.0808	20078;7669	tr|A0A068W8Z1|A0A068W8Z1_ECHGR	DUF775 domain-containing protein OS=Echinococcus granulosus OX=6210 GN=EGR_00590 PE=3 SV=1	258648	36949.7
1322_1	tr|W6U4Z9|W6U4Z9_ECHGR	5.25985	NA	66130.5	EAESEEYTAR	1	1	1	0.0169	27052	-	Intraflagellar transport protein 46 homolog OS=Echinococcus granulosus OX=6210 GN=EGR_08938 PE=3 SV=1	117617	4356.19
1320_1	tr|A0A068WJH3|A0A068WJH3_ECHGR	10.0551	NA	82166	ELLSLLQENYLHSIIEHR;FLVSESEAGNLSR;IAFAAWR	1;1;1	3	3	0.0526	62464;39926;6770	tr|W6V6K9|W6V6K9_ECHGR	tRNA (cytosine(34)-C(5))-methyltransferase OS=Echinococcus granulosus OX=6210 GN=EgrG_000210000 PE=3 SV=1	197102	3650.04
1491_1	tr|A0A068WHC1|A0A068WHC1_ECHGR	45.6708	NA	70849	AAVLSWLK;GIHTDDAFSIVPYQK;GSLFLYFLENK;KQPFLFTQCQAIHAR;NTPLGSDAESAAYVR;SFVWAEPSVLPWAK;SLTSVIAHEIAHSWTGNLVTNASWEHFWLNEGHTK;STPSGHCDEPEKPSIHYFHQDIPIPSYLVALACGELDHAR;VWIEFLAAHLGK;YVEGLILER	1;1;1;1;1;1;1;1;1;1	10	11	0.278	9579;50470;35803;54550;46625;48529;73841;74190;74189;38645;20967	tr|W6UMY4|W6UMY4_ECHGR	Leukotriene A 4 hydrolase OS=Echinococcus granulosus OX=6210 GN=EGR_02555 PE=3 SV=1	5.85643e+06	167327
1665_1	tr|U6JB19|U6JB19_ECHGR	20.1952	NA	24264.6	AEDYDLVK;AEEEFQIEK;FIEELLQEAR;LVAFIDQEANTK;YSATLGGLITQGLLQLVEPEATIK	1;1;1;1;1	5	5	0.2986	13221;22984;30995;36756;66888	-	V-type proton ATPase subunit E OS=Echinococcus granulosus OX=6210 GN=EGR_05567 PE=3 SV=1	6.89495e+06	459664
1188_1	tr|A0A068WR31|A0A068WR31_ECHGR	9.21293	NA	115172	EFVDLLYER;TFAVDTLYLEDVLHR	1;1	2	2	0.0235	26998;53127	tr|W6UNS4|W6UNS4_ECHGR	ATP dependent RNA helicase DHX36 OS=Echinococcus granulosus OX=6210 GN=EgrG_000228800 PE=4 SV=1	312822	5045.52
1204_1	tr|W6UXU3|W6UXU3_ECHGR	30.8532	NA	75029.8	AAHVFLTEACPDELFNR;EINIAFLPVECR;EKEIILDESDDLWR;EVLPLEAIYLITPTER;LILLYVIQR;LIQHAQIPEPQAAVVR;SQLVILDR;WTPYLK	1;1;1;1;1;1;1;1	8	8	0.1443	58024;42529;52269;54804;23528;52535;12741;5331	-	Syntaxin-binding protein OS=Echinococcus granulosus OX=6210 GN=EGR_06796 PE=3 SV=1	2.40314e+06	64949.6
1206_1	tr|A0A068WEY6|A0A068WEY6_ECHGR	2.04285	NA	18159.7	GLQAQLGAK	1	1	1	0.0542	9445	tr|W6UGE5|W6UGE5_ECHGR	Uncharacterized protein OS=Echinococcus granulosus OX=6210 GN=EgrG_000603800 PE=4 SV=1	323215	26934.5
609_1	tr|W6UR78|W6UR78_ECHGR	151.624	NA	692116	ACDLIAK;ACEEVCTFASTQHHYIR;ALSLIVK;ASLFEISR;DLLCSTLVCLFTGNCR;DQEEYLFVR;ELALSAR;FSLEELQPFLTPALTK;FVLEADFR;GFQNLDLAK;GSGLTDEALR;HLVTVWAR;HNLLPTLPGQFWLQPALLYR;IEAIANETFK;IKDPSAFLLNFVR;IKPTKPAFSSVEGYEVFFSVLR;IPGLEADNLPYVSR;ISNTYSSIAR;IVGLTEELNTQLAALGLAQK;LFTLQISR;LLDHVETLLQR;LLINPLIESK;LLQDLLK;LLSPTSTSFTK;LVASGIENSFLLDK;LVNMLSR;LVVLLR;MTAIVDFLR;NSEWITAESGSSDANIIHR;NWWWER;QLLAFLHK;SILIGCLLK;SLEDGIHLTES…	1;1;1;1;1;1;1;1;1;1;1;1;1;1;1;1;1;1;1;1;1;1;1;1;1;1;1;1;1;1;1;1;1;1;1;1;1;1;1;1;1	41	46	0.0738	4480;60654;60655;60653;2179;11597;56651;27920;2920;54236;15530;15978;16575;14767;65136;23833;45340;66701;46406;22237;60125;60124;14552;36127;24117;7209;26888;44663;6673;642;19230;60197;14464;13248;16506;59241;59242;50564;50563;61433;1221;25020;20226;18345;13641;58047	-	Protein purity of essence OS=Echinococcus granulosus OX=6210 GN=EGR_09233 PE=3 SV=1	1.01105e+07	36368.6
1398_1	tr|A0A068X0S2|A0A068X0S2_ECHGR	2.15456	NA	87341.1	NPLARAAVLIYLYGNMR	1	1	1	0.0225	57213	tr|W6UGM7|W6UGM7_ECHGR	Carnitine O palmitoyltransferase 1 liver OS=Echinococcus granulosus OX=6210 GN=EgrG_000721500 PE=3 SV=1	0	0
429_1	tr|U6FT50|U6FT50_ECHGR	26.9354	NA	23931.8	DDVEVEAELER;ILSDAQEAQDYQSELSALIVGNLTSR;INGSIEKDTATIK;LLASDVAGDLPAVPDHEVPRPSASSADATR;LNDLMK;VTEHDKAVLQLK	1;1;1;1;1;1	6	7	0.4623	34238;69878;39026;70945;70946;1654;38478	-	Charged multivesicular body protein 6 OS=Echinococcus granulosus OX=6210 GN=EGR_08886 PE=3 SV=1	4.39843e+06	314174
1185_1	tr|W6UK35|W6UK35_ECHGR	30.6917	NA	25794	AVAVAFLALPYR;DYLVGVALPTFR;ELSSILDSLGR;HSADFCEHFTTLR;HTFVATLVANQPAGGDLKDEASCR;LGILNDLR;SAYDESLANHHPWVVR	1;1;1;1;1;1;1	7	7	0.4211	33547;36868;27424;48606;67361;11083;55351	tr|A0A068WZ67|A0A068WZ67_ECHGR	Glycolipid transfer protein domain-containing protein OS=Echinococcus granulosus OX=6210 GN=EGR_03565 PE=4 SV=1	1.59824e+06	88790.9
1620_1	tr|U6J231|U6J231_ECHGR	26.4369	NA	57683.2	AVDNATEFR;DNHYHILSSVSQSLEHALGK;GCVTGKPINQGGIHGR;QINIDNADSIR;SGLHYSMER;TSAYISAIEK	1;1;1;1;1;1	6	7	0.1437	16773;62898;49414;49416;31656;20094;20321	-	Glutamate dehydrogenase OS=Echinococcus granulosus OX=6210 GN=EGR_07368 PE=3 SV=1	4.41003e+07	1.33637e+06
724_1	tr|W6UE73|W6UE73_ECHGR	54.8122	NA	70087.9	AYASNLR;AYEEAISSLSDVTPR;EAEDNAELHSNIAAGLINPVQLGIK;KAYEEAISSLSDVTPR;KGIMEEEK;LCSEFALMIQER;LEDEDEQGWCK;NEPFGTPEQQAQR;NFDSEFENAQK;SALADGSSGGVTLTSLK;SLQVQVQNAK;VDDTPPYPDFVDDGRPGVPIR	1;1;1;1;1;1;1;1;1;1;1;1	12	12	0.2382	4661;49034;67903;52429;13807;44205;39896;44434;35658;47104;22527;64451	-	Antigen EG13 OS=Echinococcus granulosus OX=6210 GN=EGR_05904 PE=4 SV=1	2.14019e+07	713396
1663_1	tr|U6J704|U6J704_ECHGR	29.9305	NA	54044.6	AMLDFFR;HNEEYYTVQK;LCAAHTVDLIEVK;LDQLGSSDGGNR;LFEFYK;LKELMLAHSK;SLDEYFR;VLAGLDVTYR	1;1;1;1;1;1;1;1	8	8	0.1596	10150;34678;42936;29177;7394;26070;11925;21960	-	BTB:POZ domain containing protein OS=Echinococcus granulosus OX=6210 GN=EGR_03999 PE=4 SV=1	668967	23891.7
1749_1	tr|U6JCD7|U6JCD7_ECHGR	5.25985	NA	24064.4	TLPGFTWIFLR	1	1	1	0.0514	36869	-	Programmed cell death protein OS=Echinococcus granulosus OX=6210 GN=EGR_04097 PE=3 SV=1	0	0
1661_1	tr|A0A068WPQ3|A0A068WPQ3_ECHGR	122.448	NA	95057	AFVEWGVCNHHYYGTK;ALFSYEPSNDIYNPCPEASIAFDK;ALFSYEPSNDIYNPCPEASIAFDKGDILR;DPNWWQALR;DVDHVSHILTNLDGNIDLLVAPVVPVTEASLFQEEPVAHLR;EYLWSSHGVGPK;FMHSTPR;IISGGLIER;ILAVDDQGNTVSTPDGTTLVNVILQK;KPQVVETLTAYDDVK;KRPLVLVGPK;MEQHYGHFFEFIIIPR;NEGSAIVIGR;NIPLNGR;QQLIEGLLR;QTDGDQLQQLVEESVR;QVWSEQVEK;QWTSSAANITDEELK;RANEYEISK;RPSLLTYELVDLYYPQPER;RTPFLPCVIFVSPPDNLEEMR;SNLAFDDSEEGINHGDFVSNLR;SVLQAFNLHNVIASVFER;TALAELK…	1;1;1;1;1;1;1;1;1;1;1;1;1;1;1;1;1;1;1;1;1;1;1;1;1;1;1;1	28	48	0.4656	57597;57599;57598;57622;57620;69265;69285;69264;69283;72102;27138;27140;74131;74132;37351;8934;13506;68932;50938;50937;21974;21975;59750;59747;59744;59751;16431;4136;4131;18372;54538;23632;22498;50516;22166;64768;64769;66911;65897;65896;59354;59355;2286;41211;41210;39452;14347;15310	tr|W6UZY1|W6UZY1_ECHGR	MAGUK p55 subfamily OS=Echinococcus granulosus OX=6210 GN=EgrG_000494200 PE=4 SV=1	5.72934e+07	1.33241e+06
726_1	tr|W6U9V9|W6U9V9_ECHGR	15.7985	NA	70075.9	AAPGLVLR;SAAAFAATVGAR;VAILGDSR;VPCVGYLLLEPAPLPHLR;VSSLLEDAQSCEAFK	1;1;1;1;1	5	5	0.0982	4769;21028;6559;59356;50286	-	Zinc phosphodiesterase ELAC protein OS=Echinococcus granulosus OX=6210 GN=EGR_06988 PE=3 SV=1	1.27993e+06	29765.8
1326_1	tr|W6ULC3|W6ULC3_ECHGR	15.7795	NA	13903.2	AQAACPSGEDTIFGK;IVINNGSEGCQSVYHLHIHVVGGK;KPIQMLDSATEGDEALLGHLLIVAK	1;1;1	3	6	0.5039	46669;67914;67916;67917;67915;68408	tr|A0A068WKM0|A0A068WKM0_ECHGR	Histidine triad nucleotide-binding protein OS=Echinococcus granulosus OX=6210 GN=EGR_06228 PE=4 SV=1	0	0
1495_1	tr|W6V988|W6V988_ECHGR	33.6313	NA	18515.3	ATLDLTDK;GVVYFTQVGDSVK;HGFHVHEFGDTTNGCTSAGAHFNPHGK;HVGDLGNVVAGADGK;IHAEFEGLKPGK;SLVVHVDPDDLGLGGHELSLVTGNAGAR;VACGIIGIAK;VISLSGEHSVIGR	1;1;1;1;1;1;1;1	8	15	0.7119	9018;39410;70468;70467;70466;39930;39931;35537;69726;69725;69732;69733;15802;37060;37061	tr|A0A068WLT4|A0A068WLT4_ECHGR	Superoxide dismutase [Cu-Zn] OS=Echinococcus granulosus OX=6210 GN=EGR_01933 PE=3 SV=1	9.91283e+06	708059
720_1	tr|A0A068WVQ5|A0A068WVQ5_ECHGR	13.8632	NA	57813.4	AVPKPLEKPR;EGPALQQQGGEK;ENIGNVNR;GKPQGPPPGATVGR	1;1;1;1	4	4	0.0885	23797;30563;11120;35169	-	Expressed conserved protein OS=Echinococcus granulosus OX=6210 GN=EgrG_000120800 PE=4 SV=1	1.69579e+06	51387.7
1667_1	tr|U6JCL0|U6JCL0_ECHGR	12.3709	NA	29037.9	ATESPDTFVFGDLR;HHIPYDVLLK;SLDLTSLR;TDLDSWSDR	1;1;1;1	4	4	0.1589	46789;30176;10502;21122	-	COP9 signalosome complex subunit 7B OS=Echinococcus granulosus OX=6210 GN=EGR_06047 PE=3 SV=1	5.75249e+06	359530
1324_1	tr|A0A068WIS8|A0A068WIS8_ECHGR	11.2262	NA	57460.3	LGNLVAIK;LLSLEMDR;NLPELK;SVPLIAK	1;1;1;1	4	4	0.0566	6396;14495;678;1364	tr|W6UJY2|W6UJY2_ECHGR	CD36 class B scavenger receptor OS=Echinococcus granulosus OX=6210 GN=EgrG_000609900 PE=3 SV=1	773525	33631.5
44_1	tr|W6UHX6|W6UHX6_ECHGR	19.3524	NA	20691.1	ADDNEATIVQR;GKELQAIMEK;YGFNHLSSGDLLR;YGFNHLSSGDLLRDEVQSGSPR	1;1;1;1	4	5	0.2312	29927;24564;24558;43392;65863	tr|A0A068WVC4|A0A068WVC4_ECHGR	Adenylate kinase OS=Echinococcus granulosus OX=6210 GN=EGR_04123 PE=3 SV=1	1.35264e+06	112720
1626_1	tr|A0A068WNE0|A0A068WNE0_ECHGR	19.5906	NA	62677.1	ASTSEGDVLCLTGAEVAAEK;LATPNAPALETSK;SQEFDQESR;SVTTVQSSMASER	1;1;1;1	4	4	0.0952	58496;34824;23193;38557	tr|W6UW44|W6UW44_ECHGR	Adenylate cyclase OS=Echinococcus granulosus OX=6210 GN=EgrG_000448100 PE=4 SV=1	901555	53032.7
597_1	tr|W6UFE4|W6UFE4_ECHGR	2.24328	NA	474696	YLVFNK	1	1	1	0.0014	4093	tr|A0A068WVG5|A0A068WVG5_ECHGR	Hydrocephalus-inducing protein OS=Echinococcus granulosus OX=6210 GN=EGR_04998 PE=4 SV=1	136153	569.677
6_1	tr|A0A068WFG3|A0A068WFG3_ECHGR	11.328	NA	147768	ALCADTGDNR;ALQSLHSAGLTHWEEFR;GNLEEIHPR;LVAAVAR	1;1;1;1	4	4	0.0321	20991;57898;19145;50	tr|W6U979|W6U979_ECHGR	Elongator complex protein 1 OS=Echinococcus granulosus OX=6210 GN=EGR_08070 PE=3 SV=1	2.8857e+06	47306.6
380_1	tr|A0A068WN32|A0A068WN32_ECHGR	63.5434	NA	45135.5	AVEEIAR;DKDTEFSNAER;DKLISFLENFQNDR;DMVPLILAHLDAIEFESCK;EHIAVIYDSLLVLDNVNK;GYNTPETAIHFGAILR;KPARPFNPMVR;LISFLENFQNDR;LLGELLLDR;LMMNLLK;QIAFETFHCFK;QIVELFGHILR;SRPVHMILYQNR;VFVASPTK;YIADPENLK;YLCEHPEILATLLK	1;1;1;1;1;1;1;1;1;1;1;1;1;1;1;1	16	22	0.455	4308;34733;51712;51711;62371;59576;52252;52253;34827;44167;17776;8314;40879;40877;35490;35491;34545;45041;7532;19035;50747;50746	-	Calcium binding protein 39 OS=Echinococcus granulosus OX=6210 GN=EGR_03984 PE=3 SV=1	1.37196e+07	508132
1086_1	tr|A0A068WNV2|A0A068WNV2_ECHGR	34.0336	NA	96097.3	AIVSPPK;FEIITSEASYYK;HFEEVSER;LLESSNLPNAAFR;LLVAAVIHYTPR;LNLAAGLTK;SVCQHVEDPQAR;WSDMLEVVR;YLVEDISPVDDLR	1;1;1;1;1;1;1;1;1	9	9	0.1122	588;42004;17282;41111;37025;10256;40783;23766;45958	-	Rho guanine nucleotide exchange factor 16 OS=Echinococcus granulosus OX=6210 GN=EgrG_000237400 PE=4 SV=1	2.7326e+07	581405
723_1	tr|A0A068WNA1|A0A068WNA1_ECHGR	78.6362	NA	105218	ALFSTSDCGAFQR;EVVLQPASVGTLETVSSGWASTCVQEFR;FSFLFR;GEHFGQSALDLTHVFVGGIDVSPSAR;KLTDSWNQGYDLFK;LGIPLSDTALMK;LLISGESLEQFLSSK;LQAVCLAASSK;NCCLSLPLDIVPR;NNLYLIFR;NVLSIMER;NWLVEQLR;SIAASGGHDSCHVIK;SKVEEGTVETR;SSQTTTESLHFK;TQSIMQTVAAK;TSLENSLFDAPEYQER;VSSSSQSEISK	1;1;1;1;1;1;1;1;1;1;1;1;1;1;1;1;1;1	18	21	0.2503	42472;71024;5817;68794;68792;51143;31681;49420;24627;46887;18370;13706;18701;46182;46180;30155;30153;37690;26644;55836;24008	tr|W6V812|W6V812_ECHGR	Exocyst complex component 2 OS=Echinococcus granulosus OX=6210 GN=EgrG_000443500 PE=3 SV=1	2.24678e+07	408505
386_1	tr|A0A068WPK9|A0A068WPK9_ECHGR	5.25985	NA	34715.7	AHQLVMEGFNWCHER;ELDAWIEQLYNCQQLSEAHVK;ESNVQNVSSPVTVCGDVHGQFHDMMELFR;GAGYTFGQDISEQFNHSNSLSLISR;NVVTIFSAPNYCYR;YGNSNVWK;YTFLQFDPAPR	0;1;0;0;0;0;0	1	1	0.4059	56305;56303;67527;72164;69090;69097;50891;50871;14048;37095	-	Serine/threonine-protein phosphatase OS=Echinococcus granulosus OX=6210 GN=EGR_09643 PE=3 SV=1	386940	22761.2
1624_1	tr|U6JGV2|U6JGV2_ECHGR	3.01965	NA	13522.8	NVSIISTR	1	1	1	0.0696	9672	-	Tegument antigen OS=Echinococcus granulosus OX=6210 GN=EGR_09689 PE=4 SV=1	464374	92874.8
46_1	tr|U6IXJ4|U6IXJ4_ECHGR	3.57287	NA	19379.2	SLDSTNLATK	1	1	1	0.0546	18173	-	Cysteine and glycine rich protein 1 OS=Echinococcus granulosus OX=6210 GN=EGR_00575 PE=4 SV=1	647041	53920
386_2	tr|W6UAL8|W6UAL8_ECHGR	3.81102	NA	35152	AHQLVMEGFNWCHER;ELDAWIEQLYNCQQLPEAHVK;ESNVQNVSSPVTVCGDVHGQFHDMMELFR;GAGYTFGQDISEQFNHSNSLSLISR;NVVTIFSAPNYCYR;YGNSNVWK;YTFLQFDPAPR	0;1;0;0;0;0;0	1	1	0.4007	56305;56303;67623;72164;69090;69097;50891;50871;14048;37095	-	Serine/threonine-protein phosphatase OS=Echinococcus granulosus OX=6210 GN=EGR_09643 PE=3 SV=1	60658.5	3568.15
1255_1	tr|W6UFW3|W6UFW3_ECHGR	11.2071	NA	15563.8	GAYYCVER;LAYGEDR;LAYGEDREPK;LVKPTECPPDAQVCTILK	1;1;1;1	4	5	0.25	16514;6157;26633;26631;59867	tr|A0A068WRH1|A0A068WRH1_ECHGR	Uncharacterized protein OS=Echinococcus granulosus OX=6210 GN=EGR_08209 PE=4 SV=1	3.7695e+06	342682
1622_1	tr|A0A068WQ04|A0A068WQ04_ECHGR	3.34359	NA	24884.1	GSPIGGDSQGSGFR	1	1	1	0.0625	35309	tr|W6UF16|W6UF16_ECHGR	Golgi apparatus membrane protein TVP23 homolog OS=Echinococcus granulosus OX=6210 GN=EgrG_001126500 PE=3 SV=1	4.44333e+06	370278
1084_1	tr|A0A068WF16|A0A068WF16_ECHGR	14.2173	NA	16689.3	HAILSGSNVTIPITDGK;HSCEGPDDMPAHAK;MNLGTWQGVWFIEHR	1;1;1	3	4	0.3087	51337;51336;46662;55184	tr|W6UN14|W6UN14_ECHGR	Expressed conserved protein OS=Echinococcus granulosus OX=6210 GN=EgrG_000975400 PE=3 SV=1	2.72552e+06	272552
595_1	tr|A0A068WBI3|A0A068WBI3_ECHGR	19.4802	NA	73256.4	AAQPLAGVQGR;FVLPDVR;GFQTLVEK;HQFTAVVNR;RNEADEELVR;WLHNTQQILSAAAAAADQIENHK	1;1;1;1;1;1	6	6	0.1043	19336;7358;11520;19595;29849;67050	tr|W6UR42|W6UR42_ECHGR	Phosphatidylinositol-3-phosphate phosphatase OS=Echinococcus granulosus OX=6210 GN=EgrG_001019900 PE=3 SV=1	4.27613e+06	118781
1529_1	tr|A0A068WHX0|A0A068WHX0_ECHGR	24.419	NA	41171.7	ESAPIKPVK;LKPNDGNGADLDR;QLGKPTSDEQK;QLVLEQFEK;RTDFYYGAAITDAK;WTQTLQDLEVR	1;1;1;1;1;1	6	8	0.1882	14074;38720;38719;28897;23711;22597;47883;38903	tr|W6UFW5|W6UFW5_ECHGR	Nuclear migration protein nudc OS=Echinococcus granulosus OX=6210 GN=EgrG_000463400 PE=4 SV=1	2.086e+07	906956
1181_1	tr|U6J5I9|U6J5I9_ECHGR	8.90757	NA	13784.4	GDSVILVLR;NNTQVLINCR;NPLATAAASAR	1;1;1	3	3	0.2459	14238;29938;17802	-	Small nuclear ribonucleoprotein Sm D2 OS=Echinococcus granulosus OX=6210 GN=EGR_04790 PE=3 SV=1	5.66228e+06	707786
264_1	tr|W6UQM2|W6UQM2_ECHGR	10.7038	NA	9440.83	EVALETFQSMDVDK;LSMTALR;VSFAEFK	1;1;1	3	3	0.3294	48387;4529;6367	tr|A0A068WP79|A0A068WP79_ECHGR	Uncharacterized protein OS=Echinococcus granulosus OX=6210 GN=EGR_01113 PE=4 SV=1	2.20016e+07	3.66693e+06
1259_1	tr|W6US77|W6US77_ECHGR	2.85506	NA	122028	VQAIINR	1	1	1	0.0064	5618	tr|A0A068WPL7|A0A068WPL7_ECHGR	FH1/FH2 domain-containing protein OS=Echinococcus granulosus OX=6210 GN=EGR_01251 PE=4 SV=1	61376.1	916.062
1187_1	tr|A0A068WRX6|A0A068WRX6_ECHGR	89.9877	NA	82076.1	AVGIVWDANSR;DIWNGINQGFASLLK;DKFVEISK;ELVTLYQAFHDR;EVDQLQTR;GRPGSTSSQLNISTTGK;KATSLVTSTAVASTEAER;LAEKEDAISLDGTK;LAVNSHEAHFAYSLICR;LDQMFLPAAAQIAQSR;LSPSEFQAK;LSTLLSNGVK;LTAMIEAAK;NLQCCIEGLSHVQNFYK;QHSQLSIPDKELR;SAFGQYIFR;TLENNAQNPR;VITSLVANIDK;VITSLVANIDKK;VVFQMNNLR;YILANLK;YILANLKR	1;1;1;1;1;1;1;1;1;1;1;1;1;1;1;1;1;1;1;1;1;1	22	26	0.3347	27293;50091;50092;13931;43993;43995;15112;50476;53924;43899;57984;52254;16031;17321;12981;60684;46653;46650;20725;25265;26271;34097;34098;22884;6777;15238	-	Exocyst complex component 7 OS=Echinococcus granulosus OX=6210 GN=EgrG_000685800 PE=3 SV=1	1.41457e+07	336801
1065_1	tr|A0A068WNZ4|A0A068WNZ4_ECHGR	8.83272	NA	52965.9	FVIPLSTALK;SGSLGLGHLFAAAFTHSVAVGK	1;1	2	3	0.0652	20776;61053;61054	tr|W6VAU4|W6VAU4_ECHGR	Amino acid transporter OS=Echinococcus granulosus OX=6210 GN=EGR_01027 PE=3 SV=1	397088	26472.5
1629_1	tr|W6UV89|W6UV89_ECHGR	13.7827	NA	29291.7	DADGATVLSMEK;LTLLDGIERPQLR;VPIEGENK;YIDGIFK	1;1;1;1	4	5	0.1509	30254;45559;45560;9435;7874	tr|A0A068WJ32|A0A068WJ32_ECHGR	Phospholipid scramblase OS=Echinococcus granulosus OX=6210 GN=EGR_02765 PE=3 SV=1	4.1394e+06	318415
1338_1	tr|A0A068W957|A0A068W957_ECHGR	71.8149	NA	119979	ADLSEPR;ALGNCGYGLYALVDHETASTFIAR;FITAYK;KLDQALQEK;NAQSVGFHLSFLPK;QVFQLLER;RAPLLVKPLEFK;SADPNVANHVSIYR;SAQALSILLGSLK;SFAEADTDELFER;SGAAFGPGSSGGHQR;TTLLHFLIR;VDDTKPEIVAVIEALK;VGAAVGAASALAR;VLEGLTFSAEFTAHHPPR;YFAFDPTK;YNMESMFSDLQK	1;1;1;1;1;1;1;1;1;1;1;1;1;1;1;1;1	17	20	0.1948	4297;67761;2080;19685;46430;46431;17320;40030;46367;46368;34099;45773;38076;22402;22400;51737;22389;58540;15106;44009	tr|W6V9Z5|W6V9Z5_ECHGR	Diaphanous OS=Echinococcus granulosus OX=6210 GN=EGR_01611 PE=3 SV=1	7.37802e+06	131750
1067_1	tr|U6J7J8|U6J7J8_ECHGR	3.41904	NA	17912.6	TSLTIDDLR	1	1	1	0.0596	17364	-	Expressed conserved protein OS=Echinococcus granulosus OX=6210 GN=EGR_03342 PE=3 SV=1	1.15675e+06	144593
35_1	tr|I6LNN1|I6LNN1_ECHGR	46.2908	NA	25691.1	ANKPGCLTPFPYLQK;DGQLQWMTEASAILR;EEIITFR;HLLDTDQPVAR;ILADFYK;KHLLDTDQPVAR;LEDSTITFYHMSK;LILEHQNFK;REEIITFR;YIDEPIK;YIDEPIKTK	1;1;1;1;1;1;1;1;1;1;1	11	20	0.4037	51574;51573;51576;51230;10693;32036;32035;8624;39128;39126;47333;47332;24292;24234;24233;19109;19108;9070;21955;21956	-	Glutathione transferase OS=Echinococcus granulosus OX=6210 GN=GST3 PE=2 SV=1	5.44033e+07	3.88595e+06
178_1	tr|Q6R5A1|Q6R5A1_ECHGR	3.95308	NA	18207.3	AQAEAELR;AQAEAELRR;DEVQREVEAQK;ELEVIPNVR;ESDLADMK;IAELEMLLQQER;KESDLADMK;LKEETAASAEER;NETLQTK;SQDKLAEMNR;SQVNGSGDAASQDDESEAK;VTAVSKNETLQTK	0;0;0;0;0;0;1;0;0;0;0;0	1	1	0.65	9547;17846;35795;19406;10724;43847;43108;17483;35955;35954;6710;6747;27498;27497;55768;55788;55769;40393	-	Eg18 antigen (Fragment) OS=Echinococcus granulosus OX=6210 PE=2 SV=1	1.66535e+06	151396
178_2	tr|Q24796|Q24796_ECHGR	96.1647	NA	65220	AQAEAELR;AQAEAELRR;AQMVEK;DEVQREVEAQK;EFFFLVEK;ELEVIPNVR;EQYDQTDEQWYER;ESDLADMK;EVWYFGIQYIDK;EVWYFGIQYIDKDGNPTFLR;FYPENVEEELIQTCTITHFYLQVK;GSLGQDLFDQVVR;IAELEMLLQQER;IGFPWSEIR;IIAYYK;ILALCTGNHELYMR;ISSNDFAPGSEYDFK;IYCPTDTAVLLASYACVAK;KFIIKPADK;KGTSLVLGVDALGLSIYEPGNLLDPK;KISSNDFAPGSEYDFK;KSDSIEVQQMK;LITGKEQYDQTDEQWYER;LKEETAASAEER;NETLQTK;NLSFHDKK;SDIMSGK;SDSIEVQQMK;SQDKLAEMNR;SQVNGSGDAASQDDESEAK;…	0;0;1;0;1;0;1;0;1;1;1;1;0;1;1;1;1;1;1;1;1;1;1;0;0;1;1;1;0;0;0;1;1	22	34	0.61	9547;17846;343;35795;18758;19406;53032;53033;10724;47000;66227;70894;41208;41206;43847;43108;21814;3419;50465;50492;50466;50103;50102;60827;60829;18878;18877;68503;68502;53474;53451;33623;33621;64090;35955;35954;6710;6747;15119;1821;25710;27498;27497;55768;55788;55769;40393;49134;49133;34730;34732	tr|W6UQS2|W6UQS2_ECHGR	EG10 OS=Echinococcus granulosus OX=6210 GN=eg10 PE=2 SV=1	192303998	5.06063e+06
593_1	tr|U6IZD1|U6IZD1_ECHGR	8.29105	NA	10354.8	IINIQTDMTDDR;IINIQTDMTDDRR;TSGLSNIR	1;1;1	3	3	0.2308	41245;47857;7475	-	Dynein light chain OS=Echinococcus granulosus OX=6210 GN=EGR_00995 PE=4 SV=1	1.97249e+06	394498
303_1	tr|A0A068WIV7|A0A068WIV7_ECHGR	108.487	NA	241190	ADELANQAISLK;FTGEDMDLCLR;FYAIEPTDGSEK;GWTVSLYR;HLDKFQLGQR;LAPPTVGELEASR;LEFTLFR;LPSKPLDGIANLSLIPIELK;LPYEQFVHNYTSLLDR;LSDPNAVESASR;LTDEPNYVTIR;MVIDAAK;NAHHFTSVSDFAYLQYGK;NNAATLIQAVFR;NPETLDHIASELSINR;NTIGEILLNSSLNQLLFQPTAVK;QLLDAVAK;QTLANVLTTK;QVTSIPGLK;SDPEALHVLLNCWSNLR;SPEYIK;TQALLNNINR;VILLNYPISNLK;VTNYLLEK;VYNWCVVGHR;YFELLVEELNHR;YIGILETVR;YYENIDVAK	1;1;1;1;1;1;1;1;1;1;1;1;1;1;1;1;1;1;1;1;1;1;1;1;1;1;1;1	28	31	0.154	32440;37173;37177;14754;30581;36272;11736;11733;61140;58172;30788;35275;2367;60170;35113;53569;66863;8007;20773;12675;58965;1793;25241;38819;14652;33426;33423;47038;47037;19111;22436	-	Myosin XV OS=Echinococcus granulosus OX=6210 GN=EgrG_001038000 PE=3 SV=1	2.41844e+07	210299
1082_1	tr|A0A068W9I0|A0A068W9I0_ECHGR	31.2016	NA	43882.3	DAAQFAPR;FGWLLK;GAGAQGLQVGFSNSTK;GEIFIGASGDGYSVQGKPPK;ILLPGNGNR;RPWPGPTCPAFFR;SFVFCAASEEER;SLASLSSSTEAELK	1;1;1;1;1;1;1;1	8	8	0.2513	8938;3138;45411;58479;13337;47792;41084;40634	tr|W6US12|W6US12_ECHGR	Arf GAP and Pleckstrin domain containing protein OS=Echinococcus granulosus OX=6210 GN=EgrG_000911400 PE=4 SV=1	1.33182e+07	475652
48_1	tr|W6UA19|W6UA19_ECHGR	13.3033	NA	9284.48	DCKDPIDPGR;NNFETLEECQAK;RFAYDADAK;SFIWGGCNANK	1;1;1;1	4	5	0.506	26211;43555;18607;31329;31383	-	Trypsin inhibitor OS=Echinococcus granulosus OX=6210 GN=EGR_07242 PE=4 SV=1	3.43556e+06	572593
382_1	tr|A0A068WHT1|A0A068WHT1_ECHGR	9.22281	NA	43911.9	IGLYGLEK;LQTYQLEVR;LVVTQAPIILPGLASK	1;1;1	3	3	0.0855	9825;24770;48600	-	Lachesin OS=Echinococcus granulosus OX=6210 GN=EgrG_000990100 PE=4 SV=1	672334	32015.9
1080_1	tr|A0A068W7U6|A0A068W7U6_ECHGR	2.07442	NA	17388.9	VYTTPK	1	1	1	0.0392	477	tr|W6V214|W6V214_ECHGR	Ubiquitin 40S ribosomal protein S27a OS=Echinococcus granulosus OX=6210 GN=EgrG_000785600 PE=3 SV=1	465965	58245.6
591_1	tr|A0A068X419|A0A068X419_ECHGR	52.8555	NA	71705.5	ELIELANLLEER;IVVHDGR;KQATGIVDEQDGFPR;LNMEQNQLNAQIAELNSDLCQTR;QATGIVDEQDGFPR;RPSPGTTYGLHPEEGPGK;SEHLTTFETAAVATPGPR;SPGGSILSR;SSANISELGHK;TGDGQNPVSTHGEGK;TNLSALR;VPLDEPK;WDCEVLIVTPKPVDSVR	1;1;1;1;1;1;1;1;1;1;1;1;1	13	17	0.2402	41611;4715;49670;68844;45891;55332;55331;55467;55465;8842;24272;24271;43600;3648;4793;58643;58642	-	C2 calcium lipid binding region CaLB OS=Echinococcus granulosus OX=6210 GN=EgrG_000320160 PE=4 SV=1	1.76665e+07	569888
301_1	tr|U6J4D4|U6J4D4_ECHGR	2.00731	NA	63095.6	LIQVFLK	1	1	1	0.0119	8225	-	Glycerate kinase OS=Echinococcus granulosus OX=6210 GN=EGR_00508 PE=3 SV=1	0	0
43_1	tr|A0A068WJ30|A0A068WJ30_ECHGR	5.71892	NA	71642.9	GFDIIMVR;SSQQVNFFR	1;1	2	2	0.0266	13130;22293	-	FERM domain containing protein 5 OS=Echinococcus granulosus OX=6210 GN=EgrG_001038100 PE=4 SV=1	81734.6	2403.96
98_1	tr|W6UKX8|W6UKX8_ECHGR	4.21845	NA	40059.7	ILDSISDSK	1	1	1	0.025	14535	tr|A0A068X3T7|A0A068X3T7_ECHGR	Tropomodulin OS=Echinococcus granulosus OX=6210 GN=EGR_03274 PE=4 SV=1	354899	18678.9
602_1	tr|A0A068WG33|A0A068WG33_ECHGR	79.4857	NA	74233.4	AIAAGAPPHIIAFLPLNK;GLQDILSEHGYR;LALFTPCEDLASIAPK;LEQLNCDTVAQLAPDCTHLTLDDR;LMLPLFVFTK;LNCAFTNR;LSGYTTLGVNSDIHR;NVNSNAAAELSK;RFPLGPFTFVMPFR;SGELLPNLK;SLVSSATQATDTLNENSHLLNFCVIPSYLK;SSFYQAGTSSWRPSVVLVEQSCETDFHK;STTASGEVHTFCGTINQLVTQCCPSLGSLGPIVQVK;VELQLSHLEQPVNICISPESSTVFR;VGSLFVPDKPCDESGEK;VLGAGEYASCTPK	1;1;1;1;1;1;1;1;1;1;1;1;1;1;1;1	16	25	0.4208	53709;53708;38844;38843;51896;69721;28615;15465;48895;48935;48933;29120;29189;51070;14181;72179;71835;71836;71837;73619;73618;70226;54974;54975;36984	tr|W6VCD1|W6VCD1_ECHGR	Betaine aldehyde dehydrogenase OS=Echinococcus granulosus OX=6210 GN=EGR_00474 PE=4 SV=1	1.89259e+07	610513
600_1	tr|A0A068X131|A0A068X131_ECHGR	16.783	NA	36774.3	AGAVFINIAR;EASETVPAGK;IDAEVLNAAGSNLK;LAAFSPK;SSVVGIFGLGR	1;1;1;1;1	5	5	0.1534	17267;15110;40186;1669;20971	tr|W6UFK9|W6UFK9_ECHGR	Glyoxylate reductase:hydroxypyruvate reductase OS=Echinococcus granulosus OX=6210 GN=EGR_05219 PE=3 SV=1	2.38812e+06	119406
186_1	tr|W6U753|W6U753_ECHGR	59.5904	NA	44148	CGGIGGKPGCAKPCDTCNGTGVK;DIYDQGGEQALK;DTVHPLAVTLEELYNGSTR;EISQAFEVLSDPK;FAGEGDRVPGIEPGDIIFSLDEQPHDR;FFVDFPESLSLHTVEALK;FKEISQAFEVLSDPK;GRDTVHPLAVTLEELYNGSTR;QIAPGVVQQSQTICNECNGAK;QLVVETKPGEVIKPNELR;VPGIEPGDIIFSLDEQPHDR;YYDILGVSPTATLSEIR	1;1;1;1;1;1;1;1;1;1;1;1	12	23	0.4343	64760;36101;60832;60828;42613;70723;70722;60047;60048;51680;64489;64093;64094;64092;63798;64096;59126;59125;59481;59482;62882;55821;55820	tr|A0A068WSR8|A0A068WSR8_ECHGR	DnaJ subfamily A member OS=Echinococcus granulosus OX=6210 GN=EGR_08156 PE=3 SV=1	2.10532e+07	1.05266e+06
1121_1	tr|W6UJJ0|W6UJJ0_ECHGR	18.2621	NA	83064.1	ALGDAEAFIIQR;LGQAVLGLAPLLGR;LIALEAAVPLAR;LSTIALALGPEK	1;1;1;1	4	4	0.0643	34273;38340;30294;28866	tr|A0A068WL44|A0A068WL44_ECHGR	Serine/threonine-protein phosphatase 2A regulatory subunit A beta isoform OS=Echinococcus granulosus OX=6210 GN=EGR_03499 PE=4 SV=1	76586.9	2393.34
1123_1	tr|U6J953|U6J953_ECHGR	31.6627	NA	23735.3	CEEINISGSLYR;EAIKPYK;FDAIPDQVAR;KAIIIDAR;KFCTLSR;KFDAIPDQVAR;LASIVAK;MNTNPSHGPYHYR;TLLQGQR;YHEFLR	1;1;1;1;1;1;1;1;1;1	10	11	0.3861	41518;7529;23571;10196;10863;31722;31721;177;47420;5735;8393	-	60S ribosomal protein L13a OS=Echinococcus granulosus OX=6210 GN=EGR_02356 PE=3 SV=1	1.38649e+07	866559
1201_1	tr|A0A068WVU0|A0A068WVU0_ECHGR	7.10456	NA	57827.8	HILNEVIEAHPR;IAHAEITDQGALLNK	1;1	2	2	0.0539	40901;47962	tr|W6UTE0|W6UTE0_ECHGR	RBR-type E3 ubiquitin transferase OS=Echinococcus granulosus OX=6210 GN=EgrG_001177850 PE=4 SV=1	1.2248e+06	42234.4
1064_1	tr|A0A068WS13|A0A068WS13_ECHGR	41.9319	NA	150122	AAFATAVELIER;AHEALSEMGSSVLR;CLVWEAAFISAVR;DYTEALR;FLEQNPDNNCPR;LFEVVHGSEFDLR;LPEGETFNR;NYFDTHFGPFHR;TTWLYQAVSR;VEQLILRPLDR	1;1;1;1;1;1;1;1;1;1	10	14	0.0827	33536;43749;45418;8503;44587;44536;46524;19019;46125;46127;46126;29531;36962;36963	tr|W6U387|W6U387_ECHGR	Niemann Pick C1 protein OS=Echinococcus granulosus OX=6210 GN=EgrG_001107950 PE=3 SV=1	1.86042e+07	453761
188_1	tr|W6U5L6|W6U5L6_ECHGR	2.57727	NA	168149	LGLAAELER	1	1	1	0.0059	14222	tr|A0A068WVK1|A0A068WVK1_ECHGR	RRP12-like protein OS=Echinococcus granulosus OX=6210 GN=EGR_08698 PE=4 SV=1	391036	4768.73
1069_1	tr|W6UKG8|W6UKG8_ECHGR	68.5821	NA	54954.2	AINFLHEK;AIYLIQTHERPEPK;ATAAELLSHPFLFDTKPLSGLCALIK;CLQVDPEKR;DLIISEIQVMEHTR;GLPEAWQDLISQSNFTDEEQICHPEEIINACQTHDK;IISPGDPLDK;IISPGDPLDKYSLESVLGSGASGTVR;IMNLSK;KMTDAEFYEALSK;LLHVELDPVTK;LTDFGFCAQMGSR;MTDAEFYEALSK;QCNISEISMPTSVEK;YSLESVLGSGASGTVR	1;1;1;1;1;1;1;1;1;1;1;1;1;1;1	15	19	0.3874	14218;50587;69840;69839;24428;24422;50313;74042;18501;18503;67924;354;45892;31986;31987;43877;39716;51321;47672	-	Serine/threonine-protein kinase PAK 3 OS=Echinococcus granulosus OX=6210 GN=EGR_03475 PE=3 SV=1	2.66465e+07	1.06586e+06
1203_1	tr|A0A068WES6|A0A068WES6_ECHGR	78.1225	NA	109350	ASSLFHR;DLVELFQTK;ELHGVQGWVVSHLDNICNEK;GIAFDEEYLLER;GLQEEGIYR;HTCADSFAILK;ICGAITTVSR;LALLTHR;LPLFISAADGQR;LRPHVEAPIDNR;MLENETQNSK;NIEDLISK;QELQEETSK;SSIQNLLGK;VCQYESDNK;VKDLPAQVSLEK;VNLDTFR;VTNFTVK;YCLLMASEK;YLMDHLIR;YSVLVEMR	1;1;1;1;1;1;1;1;1;1;1;1;1;1;1;1;1;1;1;1;1	21	23	0.2116	5867;21033;64553;64562;42207;19143;31873;20001;6197;33355;40282;27603;12077;20928;13602;24257;35594;8401;5388;22434;18918;18920;15532	-	Active breakpoint cluster region OS=Echinococcus granulosus OX=6210 GN=EgrG_000963500 PE=4 SV=1	1.32156e+07	227855
1569_1	tr|W6UFD7|W6UFD7_ECHGR	2.38518	NA	59015.5	VVVAMQK	1	1	2	0.0131	3655;4496	-	Heterogeneous nuclear ribonucleoprotein A1 OS=Echinococcus granulosus OX=6210 GN=EGR_05490 PE=4 SV=1	524727	15433.1
309_1	tr|U6JF16|U6JF16_ECHGR	11.4079	NA	49181.6	KPIYVTK;LQELLFGFINK;LTQFIIK	1;1;1	3	3	0.0567	7540;35332;8322	-	Eukaryotic translation initiation factor 5 OS=Echinococcus granulosus OX=6210 GN=EGR_07041 PE=3 SV=1	741071	24702.4
1062_1	tr|A0A068WW28|A0A068WW28_ECHGR	5.25985	NA	9755.07	VIEDDLYDLSR	1	1	1	0.1279	36155	-	Expressed conserved protein OS=Echinococcus granulosus OX=6210 GN=EgrG_000193900 PE=3 SV=1	685461	171365
175_1	tr|A0A068WDZ3|A0A068WDZ3_ECHGR	48.5901	NA	45429.7	EICQAIVGK;FFAQESAELTGISSHPR;FKVEHEINLK;FVIFLPNER;GLHIYPGFLER;ILSLSNAVFLR;INEWSCSSTDGLIEHFLK;KGLHIYPGFLER;QVAVMEVDEAGVK;RFFAQESAELTGISSHPR;VPMMHLGTQMVYLK	1;1;1;1;1;1;1;1;1;1;1	11	17	0.2843	16532;55269;31564;31565;23788;34139;34138;30042;30118;30117;61204;61207;41027;41028;38180;59137;49341	tr|W6VA91|W6VA91_ECHGR	Estrogen regulated protein EP45 OS=Echinococcus granulosus OX=6210 GN=EGR_01302 PE=3 SV=1	1.8842e+07	785082
1118_1	tr|U6J4M3|U6J4M3_ECHGR	21.9336	NA	38396.4	AIECYTLAIK;DLDVIFAQVDER;FEQLDEK;FLAASDNTR;KLILEDGER;LYDQALADCR;QVGHFDPITR	1;1;1;1;1;1;1	7	7	0.1988	26881;40450;10731;15424;19682;29512;26059	-	RING-type E3 ubiquitin transferase OS=Echinococcus granulosus OX=6210 GN=EGR_04595 PE=4 SV=1	1.94179e+06	80908
1577_1	tr|W6UGJ4|W6UGJ4_ECHGR	5.25985	NA	338021	TDFWEVLTR	1	1	1	0.0029	25838	tr|A0A068WYC2|A0A068WYC2_ECHGR	E3 ubiquitin-protein ligase HUWE1 OS=Echinococcus granulosus OX=6210 GN=EGR_04468 PE=4 SV=1	0	0
354_1	tr|W6UGF9|W6UGF9_ECHGR	2.76792	NA	78834.3	TSFIVR	1	1	1	0.0084	1147	tr|A0A068WHH4|A0A068WHH4_ECHGR	Leucine-rich repeat transmembrane protein FLRT1 OS=Echinococcus granulosus OX=6210 GN=EGR_05054 PE=4 SV=1	4.37152e+06	128574
936_1	tr|W6UDH9|W6UDH9_ECHGR	24.296	NA	31308	AQLPSAPQAVR;GYCFVDFASK;IPDTGPFR;LEEDIAR;LVLVNVAFSATR;NGAFLLNR;REIEEFFLPIHPLYIR	1;1;1;1;1;1;1	7	7	0.2517	23968;27598;10346;7331;33472;10596;59926	tr|A0A068X094|A0A068X094_ECHGR	Eukaryotic translation initiation factor 4B OS=Echinococcus granulosus OX=6210 GN=EGR_06300 PE=4 SV=1	1.22215e+07	678970
177_1	tr|Q0PWC5|Q0PWC5_ECHGR	27.9298	NA	25404.9	AITADGLLWGTSK;LGQILPSESLK;LQIACVVENDK;LVPLVHGINK;SSLESNGSWNER;VNELEVQIQR	1;1;1;1;1;1	6	7	0.2913	35911;27091;33385;20835;20836;37725;29684	-	EF-1 protein (Fragment) OS=Echinococcus granulosus OX=6210 GN=EF-1 PE=2 SV=1	2.91508e+06	182193
385_1	tr|W6U8W7|W6U8W7_ECHGR	33.6678	NA	47901.7	ALSIQAHPDKK;LGATQPIPTPEGISLK;LHAEQPDLYK;LLEMLDYTPLTDSLR;LSLIYFGR;RLPFLFK;SFIPPVSEFAVDVIQFDAESR;SGEAIFLK	1;1;1;1;1;1;1;1	8	9	0.2217	28541;48647;28899;52787;14071;11482;64775;64774;8409	-	Mannose-6-phosphate isomerase OS=Echinococcus granulosus OX=6210 GN=EGR_07289 PE=3 SV=1	1.40976e+07	741980
1668_1	tr|W6UGZ8|W6UGZ8_ECHGR	2.36726	NA	13771.3	KLDYVSK	1	1	1	0.0565	7732	-	Prefoldin subunit OS=Echinococcus granulosus OX=6210 GN=EGR_04839 PE=3 SV=1	2.54199e+06	231090
606_1	tr|U6JBR8|U6JBR8_ECHGR	2.67064	NA	7695.22	EGDILVLLETER	1	1	1	0.1739	38808	-	40S ribosomal protein S28 OS=Echinococcus granulosus OX=6210 GN=EGR_03526 PE=3 SV=1	0	0
1209_1	tr|A0A068WJ01|A0A068WJ01_ECHGR	226.542	NA	139061	ASTPTFSHTASR;DGENAALPLQFTLTNK;EEASLPLNAEIDQQPTIK;ESAVVAGTMGTK;GDSAEIADNFGVNR;GESAEIASNLVDEGR;GESAEIASNLVDEGRDR;GESPVIAAR;GGAGASTIQVTER;GGEYAIFDDAGETIFEK;GMSGDYDTYTGK;GNWTAMTFSQTVPR;GSFMGPHPK;GSSLPTSGK;GSSLPTSGKR;GSYDLGEAQK;HFGGIHIGK;HLIPLPLVTHISIDGEAEFTGVEFK;HTTVPLK;HTTVPLKLTQDDLLSTAEK;IKGDSAEIADNFGVNR;IKGESPVIAAR;IQSDTELAMASR;IVIEVLADK;IVIEVLADKYVR;LDSSWEDEALLVHSSADAVQHSQPPEK;LDSSWEDEALLVHSSADAV…	1;1;1;1;1;1;1;1;1;1;1;1;1;1;1;1;1;1;1;1;1;1;1;1;1;1;1;1;1;1;1;1;1;1;1;1;1;1;1;1;1;1;1;1;1;1;1;1;1;1	50	86	0.5097	31871;31872;51525;51551;58211;58233;24811;25831;42716;46484;53811;10173;30883;54913;54912;33708;47992;47991;48024;48025;13481;6713;15179;19311;13929;69403;4726;60690;60689;50950;50948;50949;24176;24175;24177;24178;35354;15699;40349;40347;40348;70777;70778;73037;72700;72699;72701;35966;35962;27311;33612;34571;14229;58706;58707;73585;48858;48857;15210;16479;15674;70048;70049;28054;32937;32938;72350…	tr|W6UNQ7|W6UNQ7_ECHGR	Galectin carbohydrate recognition domain OS=Echinococcus granulosus OX=6210 GN=EGR_01786 PE=4 SV=1	2.41711e+08	3.96247e+06
171_1	tr|A0A068WD89|A0A068WD89_ECHGR	62.5587	NA	88286.1	AGVLQTCQITPAMAK;ESLEYLLVYLK;ESQSFTASSSSR;GDIMIVAPVDAPDR;GWYEVMNENHEPVPHWTTTEEVR;IKESQSFTASSSSR;IVVEAANPR;LALSPIAGPENISGVHTLSSVLR;LFYIGTEDASSQAVFPTK;LPLSVVPVAVPER;PNLFESAER;QISLILAVEK;SAAYFLSR;TIAASTPHILKPGMLLSYVDYLHDCTVSR;TINFISMAHPR	1;1;1;1;1;1;1;1;1;1;1;1;1;1;1	15	17	0.2594	47796;37934;32465;42927;69966;45072;45071;14070;64519;57721;57720;38257;19020;22406;11061;71939;33279	-	Uncharacterized protein OS=Echinococcus granulosus OX=6210 GN=EGR_03721 PE=4 SV=1	7.72235e+06	203220
47_1	tr|W6UY44|W6UY44_ECHGR	69.2897	NA	51981.8	ARPWTATSSYICADPHFDDGTVCSSK;EDNPNAEIR;GSWHSDVLFLTPTK;GSWHSDVLFLTPTKNGGVK;GYEFQTEVTFVNHGK;ILEYDSIK;KILEYDSIK;LDLEANYTNGR;LLEQLSSDCR;MVFVNYENAK;NGYFLVLGLLDANQVIR;QLPLSEAER;SDTTDPTTYHESER;SIQDDVLEPGKSDTTDPTTYHESER;TLDAFTSQR;VSADGPVMLYTATR	1;1;1;1;1;1;1;1;1;1;1;1;1;1;1;1	16	23	0.3935	70521;70520;18667;18738;18737;47775;59346;52142;52141;52167;14710;22075;22074;32099;32098;29294;28943;56076;16918;49049;69867;17605;43476	tr|A0A068W8B3|A0A068W8B3_ECHGR	Uncharacterized protein OS=Echinococcus granulosus OX=6210 GN=EGR_01609 PE=4 SV=1	1.70519e+07	682077
173_2	tr|A0A068X1N7|A0A068X1N7_ECHGR	2.86316	NA	71664.4	SVSLESHGGR;WDTTGQYIAAGDDEGR	1;0	1	1	0.0406	17066;52125	-	Dynein intermediate chain OS=Echinococcus granulosus OX=6210 GN=EgrG_000131500 PE=4 SV=1	0	0
173_1	tr|W6U5B5|W6U5B5_ECHGR	3.41904	NA	66890.2	LAQVFAGLK;WDTTGQYIAAGDDEGR	1;0	1	1	0.0416	12947;52125	-	Cytoplasmic dynein 1 intermediate chain OS=Echinococcus granulosus OX=6210 GN=EGR_09404 PE=4 SV=1	988166	39526.6
41_1	tr|A0A068WNM0|A0A068WNM0_ECHGR	18.3379	NA	28911.1	FPFCAVCIGFYK;ILETYPDHK;IVPISYPRD;VSFADLVTDTDK;VSHCTELHNALILTDWGGDR	1;1;1;1;1	5	5	0.2348	44786;22508;18858;34683;63923	-	Inositol-1-monophosphatase OS=Echinococcus granulosus OX=6210 GN=EgrG_000451900 PE=3 SV=1	3.17599e+06	198499
604_1	tr|A0A068X3S0|A0A068X3S0_ECHGR	3.81102	NA	7677.04	VMQIDWKPK	1	1	1	0.1343	24442	-	ATPase V0 complex subunit E OS=Echinococcus granulosus OX=6210 GN=EgrG_000936100 PE=4 SV=1	6.43723e+06	2.14574e+06
1535_1	tr|W6ULI0|W6ULI0_ECHGR	2.39705	NA	49415.6	ASEQLR	1	1	1	0.0136	250	tr|A0A068WLK0|A0A068WLK0_ECHGR	Uncharacterized protein OS=Echinococcus granulosus OX=6210 GN=EGR_02843 PE=4 SV=1	1.93599e+06	77439.6
746_1	tr|A0A068WIK9|A0A068WIK9_ECHGR	5.25985	NA	24250.4	EAEVPGNTDMEDMMR	1	1	1	0.0679	51354	tr|A0A0A7E8C5|A0A0A7E8C5_ECHGR;tr|W6UU51|W6UU51_ECHGR	Tetraspanin OS=Echinococcus granulosus OX=6210 GN=EGR_00715 PE=3 SV=1	4.05675e+06	579536
91_1	tr|W6UUX9|W6UUX9_ECHGR	36.3934	NA	41953.2	ILIDHIHK;ILIDHIHKK;IWLDPNENSTIASANSR;KVEVSSAEAK;LYKDNLIIR;MLLGVVAAAATQPSAK;QLSDQAEAMR;VPTAQTATRPK	1;1;1;1;1;1;1;1	8	9	0.2169	15147;22628;55547;18061;24641;45698;45697;24653;26068	tr|A0A068WCD6|A0A068WCD6_ECHGR	Ribosomal protein L19 OS=Echinococcus granulosus OX=6210 GN=EGR_00377 PE=3 SV=1	6.06509e+06	275686
973_1	tr|W6UDU7|W6UDU7_ECHGR	7.91914	NA	92952.5	FILDIAK;YQESGISLHDR	1;1	2	3	0.0216	5997;34308;34311	-	Formin-binding protein OS=Echinococcus granulosus OX=6210 GN=EGR_06117 PE=4 SV=1	151771	3097.36
930_1	tr|U6JR38|U6JR38_ECHGR	26.1548	NA	86693	EVEAQLQR;EWVGPWSDK;FVASESLEHSK;LITVFGK;LWLTIFK;QEFWSALLEK;WCRPNELVAHPQFVADGLSR	1;1;1;1;1;1;1	7	7	0.0944	14262;21693;30077;3842;11479;31187;64766	-	Calpain-B OS=Echinococcus granulosus OX=6210 GN=EGR_08035 PE=3 SV=1	1.39375e+06	29654.2
97_1	tr|W6UKJ8|W6UKJ8_ECHGR	2.04796	NA	40781.1	LNLLVIK	1	1	1	0.0199	5581	-	Coiled-coil domain-containing protein OS=Echinococcus granulosus OX=6210 GN=EGR_03071 PE=4 SV=1	0	0
1112_1	tr|A0A068WI01|A0A068WI01_ECHGR	13.0886	NA	23565	DVHIIESDAPQHQR;VSTADFR;YFDELNESTNR	1;1;1	3	4	0.1576	49239;49237;4701;38825	-	Tegumental antigen OS=Echinococcus granulosus OX=6210 GN=EgrG_001001400 PE=4 SV=1	1.99545e+06	142532
1252_1	tr|W6U6M5|W6U6M5_ECHGR	2.14087	NA	7895.12	SSNLRK	1	1	1	0.0857	317	-	Uncharacterized protein OS=Echinococcus granulosus OX=6210 GN=EGR_11165 PE=4 SV=1	507430	101486
932_1	tr|A0A068WFI9|A0A068WFI9_ECHGR	2.39458	NA	55854.7	EPDLIR	1	1	1	0.0123	2078	tr|W6VC72|W6VC72_ECHGR	Cytosolic non specific dipeptidase OS=Echinococcus granulosus OX=6210 GN=EgrG_000992300 PE=4 SV=1	240703	9628.1
744_1	tr|W6USV5|W6USV5_ECHGR	28.9616	NA	35260.2	CEYLNSTLSETR;ELDQCIPQMLAK;IKDAEVLK;KLSDFVK;LSDFVK;NYLANK;SATDDHQAEGTAASTHPTVSNSDSR;SLTFFPDSSTCDLEK	1;1;1;1;1;1;1;1	8	10	0.2724	43089;41783;11152;6850;479;1129;67179;67180;67196;51904	tr|A0A068WB28|A0A068WB28_ECHGR	Protein kinase C and casein kinase substrate in neurons protein OS=Echinococcus granulosus OX=6210 GN=EGR_00932 PE=4 SV=1	3.31459e+07	1.6573e+06
1250_1	tr|A0A068WXD4|A0A068WXD4_ECHGR	2.00962	NA	24444	LPTALSSDDLAK;PFTSTR;SADALQAKPYPR;VIPNAEGNSGPHPIPSAPPAGVSIGAGR	0;1;0;0	1	1	0.2601	29880;461;35058;67948;67961;67962;67960;67959;67947	-	Metacestode specific membrane protein 1 OS=Echinococcus granulosus OX=6210 GN=EgrG_000353400 PE=4 SV=1	2.01096e+06	223440
1066_1	tr|A0A068WKG3|A0A068WKG3_ECHGR	46.0343	NA	51471.5	AFTTQELLNWQNFR;CETLAFCSSTDYQRPEK;CYALEK;EFNGLIDEAADVLQEVK;FFQEEGTEDLK;IDRLDTVVR;IYVEVER;LIQEDPDEKR;LNEHLVIMSK;MVQAAMDYVESIADEQVK;VISAYYTQIR	1;1;1;1;1;1;1;1;1;1;1	11	12	0.2919	52460;60270;4077;55622;36405;20555;10695;30628;27023;59023;59024;28908	tr|W6V8T7|W6V8T7_ECHGR	26S proteasome non ATPase regulatory subunit 12 OS=Echinococcus granulosus OX=6210 GN=EgrG_000421800 PE=3 SV=1	8.25174e+06	294705
1250_2	tr|W6U5T3|W6U5T3_ECHGR	8.60343	NA	118320	LPTALSSDDLAK;MMVIALPGPGHTVFK;SADALQAKPYPR;VIPNAEGNSGPHPIPSAPPAGVSIGAGR;YWLNATR	0;1;0;0;1	2	3	0.0703	29880;48051;48052;35058;67948;67961;67962;67960;67959;67947;11631	-	B-cell receptor-associated protein OS=Echinococcus granulosus OX=6210 GN=EGR_08687 PE=3 SV=1	2.15834e+06	38541.8
258_1	tr|A0A068WYA4|A0A068WYA4_ECHGR	14.0926	NA	28007.9	FVKDQQSFSVDFAVGGAESDGVVLLER;NEVTICEWEGVK;STICNDLVK;TSFPLSR	1;1;1;0	3	6	0.2191	70328;42667;42714;42663;18169;18242;5329;5328;5323;5326	-	Diagnostic antigen gp50 (Fragment) OS=Echinococcus granulosus OX=6210 GN=EgrG_000324200 PE=4 SV=1	7.46965e+06	679059
258_3	tr|W6U118|W6U118_ECHGR	10.5197	NA	30218.4	EAAIFVIIDGLMSPIK;FGKGQSNVEVALAVR;GLTSLYQNGK;GQSNVEVALAVR;GTTLVLSESPVCR;IVGTPAGPSPPMYFR;TSFPLSR;VWGSPCQR	0;0;1;0;1;0;0;0	2	5	0.3066	51197;51559;47443;20243;20250;20247;20184;30645;30698;30641;30639;30647;30643;40380;47828;47829;48251;5329;5328;5323;5326;15157	-	DUF5727 domain-containing protein OS=Echinococcus granulosus OX=6210 GN=EGR_10334 PE=4 SV=1	4.86773e+07	3.24515e+06
258_2	tr|A0A068WWK3|A0A068WWK3_ECHGR	3.04746	NA	27105.6	EAAIFVIIDGLMSPIK;EDEFDWK;FGKGQSNVEVALAVR;GQSNVEVALAVR;IVGTPAGPSPPMYFR;TSFPLSR;VWGSPCQR	0;1;0;0;0;0;0	1	1	0.2798	51197;51559;14042;47443;30645;30698;30641;30639;30647;30643;47828;47829;48251;5329;5328;5323;5326;15157	-	Diagnostic antigen gp50 OS=Echinococcus granulosus OX=6210 GN=EgrG_000566700 PE=4 SV=1	4.1163e+07	3.16638e+06
258_4	tr|A0A068WXP7|A0A068WXP7_ECHGR	43.0208	NA	32906.6	ASGPSDTMNYEIEGK;FPPPEPDEVDLK;FVQDSETFK;KSEGNAAITVK;QGSLIILK;SEGNAAITVK;SEGNAAITVKDVTK;TSFPLSR;VDFAVWGANSMSEVK;VNNLSVITSTTFFLPGCK	1;1;1;1;1;1;1;0;1;1	9	38	0.3345	48093;48450;38567;38572;38561;38569;38570;38566;38568;38565;38571;38573;38564;38562;38560;38575;38574;21499;21498;22681;22757;22755;22754;22679;22687;8729;8787;8788;7846;15175;15173;15218;15219;41167;5329;5328;5323;5326;49093;49533;49092;58270	tr|W6U8U0|W6U8U0_ECHGR	Diagnostic antigen gp50 OS=Echinococcus granulosus OX=6210 GN=EgrG_000304800 PE=4 SV=1	2.24116e+08	1.17956e+07
95_1	tr|A0A068WK39|A0A068WK39_ECHGR	3.95308	NA	57778.5	VLQQLSADAK	1	1	1	0.0193	19687	tr|W6UIU1|W6UIU1_ECHGR	Ubiquitin carboxyl-terminal hydrolase OS=Echinococcus granulosus OX=6210 GN=EgrG_000580300 PE=3 SV=1	192131	9149.11
1448_1	tr|U6J3C8|U6J3C8_ECHGR	12.1268	NA	13383.9	AAEATEEGGVITSFCR;IVDFVPER;YQAVHVK	1;1;1	3	3	0.2605	50658;14393;7287	-	Cold shock domain-containing protein OS=Echinococcus granulosus OX=6210 GN=EGR_02816 PE=4 SV=1	3.88606e+07	4.31784e+06
1256_1	tr|A0A068WVE9|A0A068WVE9_ECHGR	40.3918	NA	45037.4	FPNLVYVAFR;GGLAFESEISFHK;LCSIHFFAAASEVLGPPSVFVAK;LTILHPDSK;SGEGGSKPILVLAGPR;TFQEYYLTQLEYSLTR;TPVLFRPSPVAHLK;VSYVHLESESLK	1;1;1;1;1;1;1;1	8	11	0.2811	29585;40574;40571;66045;16842;46169;46170;59568;59569;47050;39017	-	Lysosomal protein NCU G1 B OS=Echinococcus granulosus OX=6210 GN=EgrG_000116900 PE=3 SV=1	7.57255e+06	344207
1060_1	tr|W6ULQ6|W6ULQ6_ECHGR	108.296	NA	34757.5	AGENKLGTDESTFTR;AHVNAAALQK;DLKEDLHK;DLTGTVAEMLYR;ECDCNESQAHEDAMEIYK;EIADAYK;FDSTYEK;GAGTNDDSLIR;GLGTDEATIIDVLAHR;IILAHSEDDLR;IILAHSEDDLRK;IINEVYQEETGHDLIK;IKEAYEEITQK;KETSGDYEEALCR;LGTDESTFTR;LLIDILCTASNK;LLIDILCTASNKEVK;MISGDTSGDYK;QAVEWSFYNR;RECDCNESQAHEDAMEIYK;SLEDDVESETSGDFK;SLEDDVESETSGDFKR;VLVAILQGR	1;1;1;1;1;1;1;1;1;1;1;1;1;1;1;1;1;1;1;1;1;1;1	23	43	0.7032	48712;16802;16840;16839;15585;37850;37851;62810;5420;9637;22724;22786;50191;32997;32995;39981;39979;39980;55924;55971;55923;55969;36946;36945;46905;46904;23273;37418;37419;51196;26282;27389;34013;33018;65216;65214;65213;65215;65223;49565;53685;14080;14132	-	Annexin OS=Echinococcus granulosus OX=6210 GN=EGR_06074 PE=3 SV=1	3.14923e+08	1.43147e+07
975_1	tr|W6V2K4|W6V2K4_ECHGR	2.31597	NA	864854	DGASYTSPYYSIR	1	1	1	0.0017	43416	tr|A0A068X0X0|A0A068X0X0_ECHGR	Basement membrane-specific heparan sulfate proteoglycan core protein OS=Echinococcus granulosus OX=6210 GN=EGR_05022 PE=4 SV=1	427587	903.989
1744_1	tr|U6J0K5|U6J0K5_ECHGR	5.25985	NA	51345.1	VVPGYGHAVLR	1	1	1	0.0237	25933	-	Citrate synthase OS=Echinococcus granulosus OX=6210 GN=EGR_02955 PE=3 SV=1	1.35998e+06	48570.7
253_1	tr|W6UT73|W6UT73_ECHGR	88.1381	NA	136335	ALTAVNMTDEAR;AVLWPIGFHCTGTPIK;FLSNGEQTLNVR;GEYAAGFQALK;GTGVVTSVPSDSPDDFATLR;KEFLYWYPVDLHVSGK;LGFYDGVLLMGTHAGQK;LHIGHAFSLMK;LSELHSIEGNIQK;LVYTNAVHPLN;NLLGHEQSIFK;NPTAADFR;SIFANGLLLLNSEK;STGNFLTLSDAIDKYSADGLR;STTTTGQAVEELLLYR;VFENDLR;VWEDEHQFEVDSASPDGQK;WQFLHLR;YIDLQTILLSPICSHVCEHIWR;YSADGLR;YTTVTVASLQHLR	1;1;1;1;1;1;1;1;1;1;1;1;1;1;1;1;1;1;1;1;1	21	24	0.2291	33571;53269;38375;38374;25088;58888;57869;53517;31362;42883;30533;33235;33233;9753;45335;63047;52861;52838;9798;62393;15685;69352;4004;43858	-	Leucyl-tRNA synthetase OS=Echinococcus granulosus OX=6210 GN=EGR_08555 PE=3 SV=1	7.73287e+06	113719
64_1	tr|B9ZZQ3|B9ZZQ3_ECHGR	54.4781	NA	17106.2	ELKTTLPEHFR;GGSQVFK;GGSQVFKYTGFIR;LTANLYTTYVTFK;LTLEGLKPSTFYEVVVQAFK;LTLEGLKPSTFYEVVVQAFKGGSQVFK;NVPIER;QKLTLEGLKPSTFYEVVVQAFK;SLELGWNATGLANLHADHIK;TTLPEHFR;VDPELMAK;WIHVGSR;YTGFIR	1;1;1;1;1;1;1;1;1;1;1;1;1	13	50	0.6536	37977;1126;42488;42487;46053;46055;46013;46006;46008;46012;46010;46011;46009;46054;46052;63484;63479;63486;63481;63480;63485;63478;63482;63483;63487;70765;70766;1346;66805;66992;66806;66993;66991;61714;61715;61735;61736;61737;15729;15730;15732;10337;11304;7835;7834;2747;2742;2739;2745;2743	tr|C0STG9|C0STG9_ECHGR	G1Y162 protein (Fragment) OS=Echinococcus granulosus OX=6210 GN=egG1Y162 PE=2 SV=1	8.38229e+08	6.98524e+07
255_1	tr|A0A068WJJ4|A0A068WJJ4_ECHGR	12.6444	NA	24157	APPSLTDAAANIDSR;ETLSNQSFNMGQASFALQNVK;VFGRPSNSTK	1;1;1	3	9	0.2063	44318;44316;44322;64249;64274;64272;64248;64273;21090	tr|W6U2E6|W6U2E6_ECHGR	Charged multivesicular body protein 5 OS=Echinococcus granulosus OX=6210 GN=EgrG_001063800 PE=3 SV=1	7.32958e+07	9.16197e+06
977_1	tr|A0A068WD57|A0A068WD57_ECHGR	9.07087	NA	25912.6	IVQVPNGR;TLQTIISWFK	1;1	2	2	0.0796	9346;30288	-	Ufm1 specific protease 1 OS=Echinococcus granulosus OX=6210 GN=EgrG_000799700 PE=4 SV=1	0	0
1493_1	tr|A0A068WFJ3|A0A068WFJ3_ECHGR	2.00731	NA	23938.5	TNGYATIR	1	1	1	0.0376	9992	tr|W6U774|W6U774_ECHGR	Prefoldin subunit 3 OS=Echinococcus granulosus OX=6210 GN=EgrG_000879800 PE=3 SV=1	339388	22625.8
424_2	tr|A0A068WM25|A0A068WM25_ECHGR	2.29553	NA	19513.3	GIVVIVK;SIGVSNFNK;SIGVSNFNKR;TPAQVLLR;VVEIAHK	0;0;0;0;1	1	1	0.1829	1370;13965;13919;22955;22956;10063;10064;4724	tr|W6UPD5|W6UPD5_ECHGR	Aldo keto reductase family 1 member B4 OS=Echinococcus granulosus OX=6210 GN=EgrG_000155400 PE=4 SV=1	408348	31411.4
424_3	tr|A0A068WU31|A0A068WU31_ECHGR	13.5991	NA	38663.7	APAQVLLR;DQAKPLLQEGSVVEIAHK;GIVVIVK;KTPAQVLLR;SIGVSNFNK;SIGVSNFNKR;SLLEEENVVEIAR;TPAQVLLR	1;1;0;0;0;0;1;0	3	3	0.1912	8534;57482;1370;16940;16941;13965;13919;22955;22956;44420;10063;10064	-	Aldo keto reductase family 1 member B4 OS=Echinococcus granulosus OX=6210 GN=EgrG_000156300 PE=4 SV=1	2.82803e+06	134668
424_1	tr|A0A068WM30|A0A068WM30_ECHGR	8.39416	NA	17059.6	EDIFVTSK;IPQLGFGTFDAPK;SACELSIEK	0;1;1	2	2	0.1974	12472;39030;17485	-	Aldo keto reductase OS=Echinococcus granulosus OX=6210 GN=EgrG_000156200 PE=4 SV=1	5.61254e+06	623615
424_6	tr|W6U2I8|W6U2I8_ECHGR	48.4216	NA	35879.1	AACELSVK;AMEELVSDGLVK;DPNSFSFEYHK;EDIFVTSK;EGVDFNIR;EGVDFNIRDPNSFSFEYHK;EVVTEAVEVAISTGYR;HIDCAMIYGNEK;ILSSCTIPPAVNQVEVNIHCLNTK;IPQLGFGTFYAPK;KTPAQVLLR;REDIFVTSK;SIGVSNFNK;SIGVSNFNKR;TPAQVLLR;VIWWPGFSK;YKEGVDFNIR	1;1;1;0;1;1;1;1;1;1;0;1;0;0;0;1;1	12	14	0.454	9063;33524;37951;12472;13063;64043;51330;41988;41987;68890;41413;16940;16941;21143;21146;13965;13919;22955;22956;10063;10064;22817;30524	-	Estradiol 17 beta-dehydrogenase OS=Echinococcus granulosus OX=6210 GN=EGR_09848 PE=4 SV=1	2.30978e+07	1.00425e+06
424_4	tr|W6UTJ3|W6UTJ3_ECHGR	7.43883	NA	39004.1	AMEELVFAGLVK;DLGVQYLDLYLIHWPVSFQHK;EDIFVTSK;EVVTEAVEVAIGAGFR;FDISNPSCIVYENHK;GQAKPLLQEENVVEIAHK;HNLNREDIFVTSK;HPEYPFHEEY;ILASCIIPPAVNQVEVNIHWLNTK;LFAVPIFEK;SIGVSNFNK;SIGVSNFNKR;TPAQVLLR	0;0;0;0;0;0;0;1;0;1;0;0;0	2	3	0.4548	34490;34489;67508;12472;49318;53929;53928;58392;47360;36677;36676;69107;19112;13965;13919;22955;22956;10063;10064	-	1,5-anhydro-D-fructose reductase OS=Echinococcus granulosus OX=6210 GN=EGR_08377 PE=4 SV=1	3.95082e+06	188134
424_5	tr|A0A068WU90|A0A068WU90_ECHGR	5.25985	NA	42231.9	AMEELVFAGLVK;DLGVQYLDLYLIHWPVSFQHK;EDIFVTSK;EVVTEAVEVAIGAGFR;FDISNPSCIVYENHK;GQAKPLLQEENVVEIAHK;HIDCAMFYHNEPEVGTAIAASMK;HNLNREDIFVTSK;ILASCIIPPAVNQVEVNIHWLNTK;KTPAQVLLR;SIGVSNFNK;SIGVSNFNKR;TPAQVLLR	0;0;0;0;0;0;1;0;0;0;0;0;0	1	1	0.4293	34490;34489;67508;12472;49318;53929;53928;58392;67685;47360;69107;16940;16941;13965;13919;22955;22956;10063;10064	-	Aldo keto reductase family 1 member B4 OS=Echinococcus granulosus OX=6210 GN=EGR_08377 PE=4 SV=1	327560	14889.1
742_1	tr|W6UU08|W6UU08_ECHGR	3.06516	NA	92810	WWNINVK	1	1	1	0.0085	13591	tr|A0A068WB96|A0A068WB96_ECHGR	TBC1 domain-containing protein OS=Echinococcus granulosus OX=6210 GN=EGR_00062 PE=4 SV=1	56241.7	1520.04
971_1	tr|U6JBW8|U6JBW8_ECHGR	21.5957	NA	35825.1	AFVTPEVVDASK;EFHPELEYTQPGELDFLK;EGLEIVTADDGSK;MHLELK;NFKPEEITIK	1;1;1;1;1	5	5	0.1879	31928;62194;35946;3417;29215	-	Major egg antigen p40 OS=Echinococcus granulosus OX=6210 GN=EGR_03078 PE=3 SV=1	1.38213e+07	691066
93_1	tr|H8XXX6|H8XXX6_ECHGR	9.48272	NA	18978.4	EFIEGMSQFSVK;LNFAFK;TIMFADQDGDGR	1;1;1	3	3	0.1775	39571;1937;35505	-	Calcineurin B OS=Echinococcus granulosus OX=6210 GN=EGR_02530 PE=2 SV=2	691482	62862
1261_1	tr|A0A068WSI3|A0A068WSI3_ECHGR	3.34359	NA	15103.1	LDPEALLK	1	1	1	0.0576	10118	tr|A0A068X4U2|A0A068X4U2_ECHGR	Surface protein from Gram positive cocci OS=Echinococcus granulosus OX=6210 GN=EgrG_001132000 PE=4 SV=1	268527	44754.5
1457_1	tr|A0A068WA07|A0A068WA07_ECHGR	2.89329	NA	51370.8	VDPELQVK	1	1	1	0.017	11840	tr|W6UVH3|W6UVH3_ECHGR	Protein phosphatase 1b OS=Echinococcus granulosus OX=6210 GN=EgrG_000892100 PE=3 SV=1	179777	5799.27
1363_1	tr|A0A068WCZ6|A0A068WCZ6_ECHGR	71.7697	NA	58336.8	AAQVFNER;ALSAEAEFHWVLK;CIHEFLLQDGNQWAPQVNAQK;DLPTTYAHYCVR;DSETTLK;ELSSTEQVLFSK;FAATNMITK;HLELWLR;IGTSWVWSAPQQAFEWDCSIAGYK;LRDELSLYR;NGDAHIVFEIK;QLEEAIGGIR;RAVDIFR;SLLNDSSEGSSVQSWDEIFFK;SPAYHSDLPEK;TVMSSTLYDR;VMQLLEDLKEDFGLVYSQGGR;YFAIHPILSR	1;1;1;1;1;1;1;1;1;1;1;1;1;1;1;1;1;1	18	26	0.4373	12241;44419;44418;66651;44148;4606;37808;15531;13983;69624;69635;25746;25742;30690;30691;20482;9032;65085;65083;30681;30680;26222;65391;65389;29082;29083	-	Phox OS=Echinococcus granulosus OX=6210 GN=EgrG_001037300 PE=4 SV=1	4.70732e+07	1.34495e+06
740_1	tr|W6UGL9|W6UGL9_ECHGR	16.4087	NA	22246.2	AIGSGGASDTLLIQGNNIEDVSK;GVQFGYEYK;HLALDIK;KELAAVR;TVCSHIENMIK	1;1;1;1;1	5	5	0.2836	63280;20859;5439;4279;35837	tr|A0A068WJV4|A0A068WJV4_ECHGR	60S ribosomal protein L9 OS=Echinococcus granulosus OX=6210 GN=EGR_07887 PE=3 SV=1	2.46485e+06	176061
257_1	tr|A0A068WYY5|A0A068WYY5_ECHGR	76.0762	NA	57255.5	AAHSIDVR;ALDKYLK;CDAENFR;CPEFEATLDEEFK;DLQLVQDWANLVCSTGTMR;ELEEYLESMHGEAK;KSCCPTYALR;LGTYSALR;LGVSYETILEEYLVR;LLMDNGWR;LYSAYQVAVHNDPPEK;NQYLPSYLACPETYAWVALEK;SDSTYYTIAGEITAQDYK;SQLTIEGNVMVTSVGAAK;TSKDEEDTLPEDGCR;VVILLPLSTTLDWLLPK;VVPAYADFTQYYMGFYVHACQK;WQALQDR	1;1;1;1;1;1;1;1;1;1;1;1;1;1;1;1;1;1	18	25	0.4841	8562;7649;10844;48451;62453;62452;49785;31463;9215;52896;15968;54134;54133;54132;66909;66910;58998;58999;53466;53516;52052;52051;56482;68353;11178	-	Arginyl-tRNA--protein transferase 1 OS=Echinococcus granulosus OX=6210 GN=EgrG_002059700 PE=3 SV=1	2.92177e+07	885385
210_5	tr|W6UFG1|W6UFG1_ECHGR	40.6347	NA	20724.8	DAVLLVFANK;HYFQNTQGLIFVVDSNDR;HYFQNTQGLIFVVDSNDRER;ILMVGLDAAGK;IRPLWR;LGEIVTTIPTIGFNVETVEYK;LGLNSLK;MLSEDELR;MLSEDELRDAVLLVFANK;NVNFTVWDVGGQDK;QDLPNACPASEMTQK;QWFIQATCATTGTGLYEGLDWMAK;TTILYK	1;0;1;0;0;1;1;1;1;1;1;1;0	9	24	0.7802	20832;61570;65945;65921;65948;65941;65946;65942;65922;65944;65940;65924;65984;65949;20670;21727;7030;64407;2228;15309;16093;59735;59734;47556;47594;49966;69266;69267;1897	-	ADP-ribosylation factor OS=Echinococcus granulosus OX=6210 GN=EGR_05324 PE=3 SV=1	6.07226e+07	5.06022e+06
210_4	tr|U6JEY5|U6JEY5_ECHGR	21.0394	NA	20373.5	HYFQNTQGLIFVVDSNDR;HYFQNTQGLIFVVDSNDRDR;IGEAAEELQK;ILMVGLDAAGK;IRPLWR;LGEVVTTIPTIGFNVESVEYR;MLSEEDLANAAVLVFANK;TTILYK	0;1;1;0;0;1;1;0	4	9	0.5111	61570;65756;65743;65757;65742;20648;20670;21727;7030;64406;64405;56835;56832;1897	-	ADP-ribosylation factor 4 OS=Echinococcus granulosus OX=6210 GN=EGR_03438 PE=3 SV=1	6.30666e+06	573333
210_1	tr|W6UI23|W6UI23_ECHGR	5.25985	NA	12124.4	ILMIGLDAAGK;TTILYK	1;0	1	1	0.1532	21596;1897	-	ADP-ribosylation factor OS=Echinococcus granulosus OX=6210 GN=EGR_04367 PE=4 SV=1	525173	75024.8
210_3	tr|A0A068WC74|A0A068WC74_ECHGR	30.4539	NA	20216.7	EGLTWLSR;FNVWDVGGQEK;HYFTGTQGLIFVVDSADR;HYFTGTQGLIFVVDSADRER;IRPLWR;LNNAVTTIPTVGFNVETVSYDNIR;TTILYR;VWYVQPSNATTGEGLK	1;1;1;1;0;1;1;1	7	7	0.517	13705;32758;59008;64230;7030;68150;3285;52025	-	ADP-ribosylation factor 6 OS=Echinococcus granulosus OX=6210 GN=EgrG_001006100 PE=3 SV=1	2.88325e+07	2.4027e+06
210_2	tr|W6U6M6|W6U6M6_ECHGR	34.5941	NA	30841.8	FQVWDLGGQTSIRPYWR;ILILGLDGAGK;LQVGEVVTTIPTIGFNVETVHYK;QDIDGCMSVTQVASSLGLTSIK;QELISMLEEEELK;TAVLAVFANK;TTILYK;TYQIFK	1;1;1;1;1;1;0;1	7	7	0.3913	60672;19472;67217;64208;47858;17380;1897;4891	-	ADP-ribosylation factor-like protein OS=Echinococcus granulosus OX=6210 GN=EGR_08271 PE=3 SV=1	3.63776e+06	242517
555_1	tr|A0A068WFP5|A0A068WFP5_ECHGR	53.4309	NA	57536.6	EIGPYVYMEK;FIFAADLCR;GDHSQVSFYQR;GTDGSHLAPDVSMNSR;GYCPPK;LGLVLEAYK;LQISVYVRPSR;LTFTLNR;QNELRPPIYSSQPYFFGADPTVR;RFIFAADLCR;RQNELRPPIYSSQPYFFGADPTVR;SVLDVWSSDEANQIK;TAGPPCPPAGIFDLSSCR;VGLMFGK	1;1;1;1;1;1;1;1;1;1;1;1;1;1	14	18	0.2743	29719;22295;35389;35390;49203;49201;49225;1065;15994;35120;8414;68664;32237;69958;50464;50491;56005;2551	tr|W6V978|W6V978_ECHGR	CD36 class B scavenger receptor OS=Echinococcus granulosus OX=6210 GN=EgrG_000637200 PE=3 SV=1	2.50668e+07	895244
1532_1	tr|W6UUB3|W6UUB3_ECHGR	13.2968	NA	92839.5	EASWLQR;GIAALGFYKPSAIQEK;IAFGLAIR;VDCETYLHR;VDITFER	1;1;1;1;1	5	5	0.0564	9651;50530;8222;27542;9158	tr|A0A068WCY8|A0A068WCY8_ECHGR	RNA helicase OS=Echinococcus granulosus OX=6210 GN=EGR_00197 PE=3 SV=1	1.98573e+06	47279.2
422_1	tr|A0A068WFU9|A0A068WFU9_ECHGR	71.7042	NA	151579	ATNTSFHHPLR;HAQVIGFPSR;ITETSAVIR;LTGQAGGATSEIGR;LTLVPHLEETAESTEFK;NEPSLWVGTNR;NFFTNLFTGNGLSSADKDALFGEK;QSDTSEQSSIDQSVLEGIR;RATNTSFHHPLR;SACGTAALLPSGR;STIQEGTAEGQTLVTSNDSFSSK;TASSWHLFR;TGESIIVFSGGSR;WDAGSSAVPR;WLIYFHSNR;YFMVVISEK	1;1;1;1;1;1;1;1;1;1;1;1;1;1;1;1	16	19	0.1448	32921;32920;22243;15188;35092;57032;32429;67713;60039;41338;31766;65242;65243;21798;21800;34647;17929;30211;22514	-	Syntaxin binding protein 5 OS=Echinococcus granulosus OX=6210 GN=EgrG_000642900 PE=4 SV=1	3.22375e+07	596990
1393_1	tr|W6UQI6|W6UQI6_ECHGR	42.1391	NA	50045.1	AIAAATAK;EASLNSNIEAK;LHPHYNVFVSASEDATIK;QICIWDVR;QRDELHQAIADYLR;TAPFLITGSVDQTIR;TLDAHSHFVTTLDIHR;VWDYEVGEFEATLK;VWEVATGYCVK;YLLSASDDK	1;1;1;1;1;1;1;1;1;1	10	14	0.2737	857;26455;59052;19656;51039;51430;48576;48577;54958;54957;54956;50337;34745;16223	-	Lissencephaly-1 homolog OS=Echinococcus granulosus OX=6210 GN=EGR_02090 PE=3 SV=1	3.60704e+06	128823
181_1	tr|U6J165|U6J165_ECHGR	21.9213	NA	17211	EAAVVPEGEVHFR;EVLHLPTEIVPATLNKPSIDSR;IGAVGQVDAAK;MLVPLNIR;TFYWFLTNEGIDYLR	1;1;1;1;1	5	6	0.4481	41455;65802;65803;17094;13390;56894	-	40S ribosomal protein S10 OS=Echinococcus granulosus OX=6210 GN=EGR_00286 PE=3 SV=1	6.19638e+06	563307
820_1	tr|A0A068X383|A0A068X383_ECHGR	22.7825	NA	66677.7	AGELLHR;ALFLHYLSHVQR;AYENAVAEAPNGK;LDKYTPELHPDSAYVK;LFNYAAIK;NPEWAEVSDR	1;1;1;1;1;1	6	7	0.1128	4716;43629;43630;35990;55251;12532;28195	tr|W6UFX6|W6UFX6_ECHGR	RhoGEF domain containing protein OS=Echinococcus granulosus OX=6210 GN=EGR_05202 PE=4 SV=1	8.439e+06	191795
553_1	tr|A0A068WD37|A0A068WD37_ECHGR	104.135	NA	58858	AGISVIR;ALEIEEEYIGK;AYHAIDPAK;DILHPK;DVLNEIER;DVQFGNIEAGK;EHGKDVQFGNIEAGK;EITVEHPAAK;ELGVWDPVAVK;GASKDVLNEIER;GTPVLILNQNTR;HKPDVVITEK;ICEEIIR;IDDIVSGTK;LIGDEYFTFITGCK;LIGDEYFTFITGCKDPK;LSIPVDVNNHEAMVNLVK;LVPGGGALEMALAQELSQK;NLQDAMSVVR;QALEDITTAIDTK;TAIETAILLLR;TDEIKEEDIGTGAGLFEVK;TLAQNCGANVLK;VAYLAVAQALEVIPR;VVTIVDGGR	1;1;1;1;1;1;1;1;1;1;1;1;1;1;1;1;1;1;1;1;1;1;1;1;1	25	35	0.4861	804;33676;14958;1144;15063;26632;48776;21150;28856;35801;35545;35590;25797;25799;25800;25798;12135;12137;12975;49757;58410;58411;58103;56268;56265;23633;40383;39582;28922;59504;33386;33433;48428;48427;11142	-	T-complex protein 1 subunit gamma OS=Echinococcus granulosus OX=6210 GN=EgrG_000872100 PE=3 SV=1	5.19793e+07	1.20882e+06
1399_2	tr|A0A068WHB3|A0A068WHB3_ECHGR	33.0064	NA	145059	FDVITLILAGK;GSVAPSQTGTTAK;GVLLTAPGAR;LIDIFAK;LIIVDNSVDCR;LVDALAFFEDER;LVTLDSMLPVGK;SPYEFLQTR;TAVEDIESTPIKK;TGPQLDVIPR;TTDTIQFALNK;VSVLPVVDSLTNR	1;1;0;1;1;1;0;0;0;0;1;1	7	7	0.1001	27439;28328;13343;5996;34269;40737;32452;24149;41068;41067;21211;31247;39432	-	SNF4:AMP activated protein kinase gamma subunit OS=Echinococcus granulosus OX=6210 GN=EGR_03217 PE=4 SV=1	4.97493e+06	62973.8
1124_1	tr|W6U3Z0|W6U3Z0_ECHGR	9.92279	NA	54144.3	SELALASGLIK;VLNSPTFR;YQTFSNTINIVDQCHQR	1;1;1	3	4	0.0742	21598;21597;12201;60993	-	COP9 signalosome complex subunit OS=Echinococcus granulosus OX=6210 GN=EGR_09838 PE=3 SV=1	1.18356e+06	47342.3
1391_1	tr|U6J3Y6|U6J3Y6_ECHGR	23.8491	NA	11232.3	EIIYDLLNEAENR;ESCDEEFK;IKESCDEEFK;LKEIIYDLLNEAENR;NFDTDMKEER;SWPQNLAR	1;1;1;1;1;1	6	11	0.4624	47887;47888;17818;33134;33135;54208;33132;33131;14210;14209;14211	-	Dynein light chain OS=Echinococcus granulosus OX=6210 GN=EGR_00997 PE=4 SV=1	1.13752e+07	1.89587e+06
420_1	tr|W6V1F9|W6V1F9_ECHGR	2.27188	NA	86881	IYYLR	1	1	1	0.0062	1351	tr|A0A068WW40|A0A068WW40_ECHGR	GAS2-like protein 3 OS=Echinococcus granulosus OX=6210 GN=EGR_05461 PE=4 SV=1	2.0648e+06	51620
1334_2	tr|W6US78|W6US78_ECHGR	5.25985	NA	64156.2	AGVTVICANDPDADR;DFNSTPLLAYGVR;EGFNFEETLTGFK;ETICFTEEENGK;FVYTAMHGVGAPAAQR;HLVLVEEQIKPDPEFPTVK;IFHHFGFK;MEFGTAGLR;QLDHIFDIYGK;SALELAIATANR;VYWENGAQILSPHDK;YLTDNHSYLKPK;YYSELCGKPGDKR	0;1;0;0;0;0;0;0;0;0;0;0;0	1	2	0.2942	47423;42114;42157;45254;42353;50059;62648;62649;17302;14742;36752;36753;29802;52198;43395;43398;43399;47351;47350;47353	-	Phosphoglucomutase-2 OS=Echinococcus granulosus OX=6210 GN=EGR_08839 PE=3 SV=1	549645	14855.3
212_1	tr|A0A068WHG1|A0A068WHG1_ECHGR	5.69387	NA	88135.8	GLETSGLYR;KRPTLESIR	1;1	2	2	0.0229	15476;21474	tr|W6UNY5|W6UNY5_ECHGR	Rho GTPase activating protein 12 OS=Echinococcus granulosus OX=6210 GN=EgrG_000976700 PE=4 SV=1	1.93478e+06	42060.4
183_1	tr|A0A068WXJ6|A0A068WXJ6_ECHGR	5.25985	NA	56533.8	GLASLVEVAYFAAR	1	1	1	0.0273	42840	tr|W6UJ37|W6UJ37_ECHGR	Expressed conserved protein OS=Echinococcus granulosus OX=6210 GN=EgrG_001098400 PE=4 SV=1	0	0
251_1	tr|A0A068WCI4|A0A068WCI4_ECHGR	158.155	NA	108022	ACLVSVGHSIVAEAK;AFCAIINR;ALDFIQK;AVEISQMSDQLCDSYNR;DLEVEIEGLCK;ELTDLDTSDQLLQSFR;ETPIDPIWEK;FIQLATELNGWLEQTQGR;GYLTEADLR;HQNLSDAQSVLEK;IRDLEVEIEGLCK;KHEAFVSDLMAQQDR;KHQLVCDQVR;KPVLNLEDVNK;KTFTAWCNLHLK;KTSVDTSDEDILK;LETTFR;LHEQWK;LINAHAEYEK;LLTNLDGELEAQRPK;LNNVGLGEASLEEQVK;LSAPFHNWMQQAEEDLLDK;LSAPFHNWMQQAEEDLLDKFIAQSTADVEK;LVGIAAEEIVDGNVK;NAEITIIEEDFR;NEIENQILTR;NLGYTDMPSIDSR;NYEEWLMGER;QYQTEEKPAKI…	1;1;1;1;1;1;1;1;1;1;1;1;1;1;1;1;1;1;1;1;1;1;1;1;1;1;1;1;1;1;1;1;1;1;1;1;1;1	38	53	0.4653	46298;46297;46296;13869;6772;58713;34320;55366;55363;29675;60531;17555;42921;42922;47399;47398;52644;52642;33037;33038;32251;32248;45285;42006;3274;7012;27286;27285;27348;50643;50640;50641;50739;63510;72730;72729;45663;41960;41958;29787;42904;35559;51291;67445;6093;31874;30027;15520;39004;39006;21710;28777;47149	-	Alpha actinin sarcomeric OS=Echinococcus granulosus OX=6210 GN=EGR_01584 PE=3 SV=1	5.72762e+07	894941
1126_1	tr|W6U648|W6U648_ECHGR	33.2834	NA	11555.9	EYNADSSRPIK;EYNADSSRPIKLESLVTQLGR;FVVLVWQSSTY;LESLVTQLGR;NFIIDQVDDTLR;NFIIDQVDDTLREYNADSSRPIK;SDMPTEMK;SEVEVLK	1;1;1;1;1;1;1;1	8	25	0.596	32906;32851;32907;32850;65107;65131;65132;65129;65108;65106;65130;35686;22537;22536;41966;41934;41962;41932;41935;68919;12403;12402;13315;13316;5098	tr|Q5BU38|Q5BU38_ECHGR	Tegumental protein OS=Echinococcus granulosus OX=6210 GN=EGR_08521 PE=4 SV=1	1.44898e+08	2.06998e+07
426_1	tr|A0A068WK01|A0A068WK01_ECHGR	10.5197	NA	69072.2	LPVLLILDR;VASSDLLSAVR	1;1	2	2	0.0325	18320;22683	tr|W6U453|W6U453_ECHGR	Vacuolar protein sorting associated protein 45 OS=Echinococcus granulosus OX=6210 GN=EgrG_001073000 PE=3 SV=1	697674	19379.8
1397_1	tr|A0A068W859|A0A068W859_ECHGR	45.8326	NA	83766	AFTALCNLSEYK;AIAAQLK;DHWVPCEVR;DSLVGTLRPSDSQDTLR;EATSNGIAHQLR;GLDEVLQELR;GTINPGGNDSGK;HLALEAK;LTDDRLELLDHNGER;LVPAGIFGNK;LYDNVPTSESGEK;NPLTQSR;VLHWFPYLLIR	1;1;1;1;1;1;1;1;1;1;1;1;1	13	15	0.1847	40263;749;27851;27852;54868;33930;26175;22564;22640;4031;53265;16456;41397;5715;42346	-	Docking protein 3 OS=Echinococcus granulosus OX=6210 GN=EgrG_000848300 PE=4 SV=1	6.89977e+06	135290
83_1	tr|A0A068WPG1|A0A068WPG1_ECHGR	15.7795	NA	54023.7	AGYRPEASESNHLYNPSDDEK;DLAPPNAYYLIIQR;LLITTGDDLGSSYVDAQHYLQCR	1;1;1	3	4	0.1218	65150;65149;49321;68009	tr|W6UTR9|W6UTR9_ECHGR	Ferric chelate reductase OS=Echinococcus granulosus OX=6210 GN=EgrG_000487700 PE=4 SV=1	2.94719e+06	140342
185_1	sp|Q24799|MYPH_ECHGR	8.02776	NA	21231.9	GYGVPVADLFQTVDLFEK;LYEDILK	1;1	2	2	0.1316	58269;9870	tr|W6U948|W6U948_ECHGR	Myophilin OS=Echinococcus granulosus OX=6210 PE=2 SV=1 >tr|Q0PWB3|Q0PWB3_ECHGR Transgelin OS=Echinococcus granulosus OX=6210 GN=EgrG_000653900 PE=2 SV=1	177863	11857.5
828_1	tr|A0A068WGT6|A0A068WGT6_ECHGR	6.74692	NA	40651.7	LVLCETYTYDQKPHSSNK;YLELPSEK	1;1	2	2	0.0714	62058;14590	-	Glutamine synthetase OS=Echinococcus granulosus OX=6210 GN=EgrG_000959900 PE=3 SV=1	8.63175e+06	507750
1501_1	tr|A0A068WH30|A0A068WH30_ECHGR	3.57287	NA	35445.5	YGLSSISDK	1	1	1	0.028	14100	tr|W6URM7|W6URM7_ECHGR	Expressed conserved protein OS=Echinococcus granulosus OX=6210 GN=EgrG_000469400 PE=4 SV=1	137840	6892.01
447_1	tr|U6IWF1|U6IWF1_ECHGR	3.57287	NA	37159.9	FLSIGLALSGVDSK	1	1	1	0.0413	39834	-	GlcNAc kinase OS=Echinococcus granulosus OX=6210 GN=EGR_01510 PE=3 SV=1	113794	5172.46
1015_1	tr|W6UWW8|W6UWW8_ECHGR	66.9981	NA	88549	ATNPTSDIFTK;EVENDAHLK;FLTNDDR;GLDELNAAILEK;IQELEGIRDEIMSDVFK;IVEAFQK;IYDAYNAIGLIGR;LATHLLIDYLR;LLHFLGNVVR;LLPQLGR;LQQSFPDVR;QNSSADLDTLR;SESLENIDVIR;SYVDSLSR;TATEAQLK;TLNFTSVHER;VQGCSVDSENEK	1;1;1;1;1;1;1;1;1;1;1;1;1;1;1;1;1	17	21	0.2227	27687;18476;9195;33237;58916;6773;41414;35650;35649;25943;25942;4768;20806;20802;29245;32544;11771;8267;28271;28273;36897	tr|A0A068WBA7|A0A068WBA7_ECHGR	Exocyst complex component 3 OS=Echinococcus granulosus OX=6210 GN=EGR_07171 PE=3 SV=1	4.19502e+07	839004
1017_1	tr|W6UKC0|W6UKC0_ECHGR	44.7642	NA	22401.5	FQTITASYYR;GAMGIMLVYSVTCR;HFETSAMNGTNVEAAFLELTR;KSFENISK;KTYDLLFK;LMLIGDSGVGK;QVSVEEGLAVAER;TCILFR;TVEIDGKR;TYDLLFK;WMSNITNLASEEVEK	1;1;1;1;1;1;1;1;1;1;1	11	14	0.57	31107;46914;64611;64612;13238;17031;20818;38804;37922;38802;5425;11271;10166;52020	-	Ras-related protein Rab-10 OS=Echinococcus granulosus OX=6210 GN=EGR_03430 PE=4 SV=1	2.04038e+07	1.27524e+06
528_1	tr|W6V1T8|W6V1T8_ECHGR	85.6633	NA	36105.4	AASESSALK;AGIALNDTFVK;GILEYTEDQVVSTDFLSTTCSSTFDAR;ITVFQEMSASAIPWSQAGAEYIVESTGINTTVEK;KVIISAPSADAPMFVVGVNHEK;LIAWYDNEFGYSCR;LSKPATYDQIK;LTGMAFR;LVIDSHR;MKPQVGINGFGR;TAAQNIIPASTGAAK;VIISAPSADAPMFVVGVNHEK;VINDNFGIVEGLMTTVHSYTATQK;VIPELNGK;VPTPNVSVVDLTCK;VVDGPSKK;VVDLISYMFK;VVSNASCTTNCLAPLAK;YDPSMK	1;1;1;1;1;1;1;1;1;1;1;1;1;1;1;1;1;1;1	19	57	0.7619	8342;24755;24684;24754;24756;71032;73244;73243;64197;64198;64196;64213;64214;53155;53154;53183;31982;5502;6973;34332;34336;34333;34331;34328;34337;34335;34330;40187;40152;40153;40150;40154;62032;62033;62041;68158;68166;68165;68163;68159;8667;8670;8668;8666;8630;45750;45751;6504;28965;29870;53485;53511;53513;53515;53552;53484;1959	-	Glyceraldehyde-3-phosphate dehydrogenase OS=Echinococcus granulosus OX=6210 GN=EGR_05325 PE=3 SV=1	1.6915e+08	8.45751e+06
863_1	tr|A0A068WN30|A0A068WN30_ECHGR	36.8414	NA	38047.6	EGEVDAALDVLK;EREGEVDAALDVLK;MVEAPQHTAFIPETPK;RPDADNANRPGLHNQPSAEEMTR;SKRPDADNANRPGLHNQPSAEEMTR;SSSNTNENAGQEHETMFQQFTNSIR;TLEVAPAIAR;VKEELEK;VRPPIPESFHQPTAASVSSVTASK	1;1;1;1;1;1;1;1;1	9	18	0.3569	31663;46401;53248;53249;67580;69672;69673;70071;70080;70070;70072;70185;70075;70078;17730;8901;66608;66609	-	Expressed conserved protein OS=Echinococcus granulosus OX=6210 GN=EGR_09857 PE=4 SV=1	2.15914e+07	1.27008e+06
214_1	tr|W6UHT4|W6UHT4_ECHGR	14.3585	NA	54645.2	LLGLVTLR;LLVGGAISTHADGWDR;NLIDAGADALR;SHSAQIEGSVHSLHSYEK	1;1;1;1	4	4	0.1045	9407;49870;23402;58202	-	Inosine-5'-monophosphate dehydrogenase OS=Echinococcus granulosus OX=6210 GN=EGR_04088 PE=3 SV=1	5.30186e+06	196365
824_2	tr|W6UKF4|W6UKF4_ECHGR	24.3505	NA	42017.8	CDLEDER;INVSEVFYDLVR;KVEVDNEQCILEILDTAGTEQFTAMR;LVVLGSGGVGK;QWNCSFMETSAK;SALTVQFVQGIFVEK;YDPTIEDSYR	1;1;1;0;1;1;0	5	6	0.2435	12316;42165;42164;70928;14982;43821;49827;31629	tr|A0A068WII9|A0A068WII9_ECHGR	Ras-related protein Rap-1b OS=Echinococcus granulosus OX=6210 GN=EGR_03026 PE=3 SV=1	1.96544e+06	89338.4
1191_1	tr|W6UC73|W6UC73_ECHGR	2.07306	NA	98130	VILLDR	1	1	1	0.0067	1413	tr|A0A068WUA6|A0A068WUA6_ECHGR	Diacylglycerol kinase OS=Echinococcus granulosus OX=6210 GN=EGR_06871 PE=3 SV=1	5.92258e+06	126012
824_1	tr|A0A068W961|A0A068W961_ECHGR	21.9395	NA	20806.5	CDLDNER;EQGQTLAR;INVNEVFFDLVR;LVVLGSGGVGK;NWNCVFMETSAK;VKDTHEVPLVLVGNK;YDPTIEDSYR	1;1;1;0;1;1;0	5	6	0.4098	11486;10339;42744;14982;43725;49350;49351;31629	tr|W6V9Z6|W6V9Z6_ECHGR	Ras protein Rap 1b OS=Echinococcus granulosus OX=6210 GN=EgrG_000859400 PE=3 SV=1	6.85965e+06	685965
1462_1	tr|W6UCJ7|W6UCJ7_ECHGR	150.449	NA	279712	ALSAYFSSLIDAK;AVDLVNAQGSPEFWDR;DILDASTMK;EAIDIWLTK;EHLEFLSPITSLEHMFSEMAQK;ESLISSSEVASR;FGLIQTPYQLR;FGQTQTPIQEK;FLNELITTLR;GIQIDIEK;GIVDRPK;GLNRPVSGIMLCDYSTK;GLYPQQDASNLQTLININR;HDVSLEPSQQEPR;HLQFTSGPQK;ITEVASYR;KRPGEQISEAIEETK;LLYKPTR;LNSYITEGLFK;LRDHVNQIK;LYESTSTK;SALPIPR;SAPPIETTPTPVTLR;SQTIYIPEHYVAVAK;SQVTYIPEVK;TPFQLHYEGIVTGEVEPTVVETSTSR;TPGYVEATK;TQIHTIQR;VEMLIAK;VFEQFLEEVER;VHISNASEYQLFYYNC…	1;1;1;1;1;1;1;1;1;1;1;1;1;1;1;1;1;1;1;1;1;1;1;1;1;1;1;1;1;1;1;1;1;1;1;1;1;1	38	44	0.1776	38733;53478;15365;20759;67800;32023;36071;32652;29272;11141;4157;56242;56241;61671;61672;45408;45405;24277;12477;51151;9741;33169;23030;11885;2628;47582;51244;51245;25667;70194;13912;15541;5106;40736;68278;48232;8212;12882;272;43468;43473;22300;53363;53364	-	Uncharacterized protein OS=Echinococcus granulosus OX=6210 GN=EGR_09161 PE=4 SV=1	3.73912e+07	285429
822_1	tr|W6UWQ6|W6UWQ6_ECHGR	104.228	NA	134673	ALELIEVLDR;AWPEATEYLLK;ELGLQRPILSVAYLTNHALGETK;FWTNFPVWQR;GQWAENIVALTHCLHR;ILTEEMR;LDLNALMGK;LGSGPFASSK;LQQALALLTENHESDLIR;LYLPNAEVELR;NNNEIFVR;QEDILLHER;QPIVLAVSSPDALTAIISQQTQR;SISVLETNGATIPSAEWAR;SIYSLVLTFAR;SSIGSASIVQGLR;TANFWCPVDEVDVDSEVTR;TAPEVLK;TQGNSTAGDLSGLLTSK;TVLSAHLSNWKPLNNPTLPVTDIR;VFLLSFIDR;VQAYNLFGNLPR;YNEVTQILNVYR	1;1;1;1;1;1;1;1;1;1;1;1;1;1;1;1;1;1;1;1;1;1;1	23	25	0.2537	26127;35281;66966;66984;38455;56069;9762;14395;13122;59767;35065;15974;23824;24962;65906;58379;32297;32567;62937;2813;49393;68680;22125;39076;44947	-	Exocyst complex component Sec8 OS=Echinococcus granulosus OX=6210 GN=EGR_00360 PE=3 SV=1	3.13763e+07	475399
216_1	tr|A0A068W9W3|A0A068W9W3_ECHGR	40.5007	NA	51083.1	AVYNLTHLHVDK;ENISSTSSSNIR;FSNEEEFNNFFEAIK;IVVIATK;KPDPAPSAPEPKPAESEK;KQPGEIFAMK;LRNGHTPAPHTPVQKPHHTR;MNAQMTK;SVGAATYVTTDVLAK;YLTYVPGK	1;1;1;1;1;1;1;1;1;1	10	14	0.2684	39976;33730;55011;54993;2177;55230;55229;24679;24678;63704;63705;6154;44171;12581	-	Expressed conserved protein OS=Echinococcus granulosus OX=6210 GN=EgrG_000757300 PE=4 SV=1	1.17293e+07	378363
121_1	tr|A0A068X125|A0A068X125_ECHGR	19.7921	NA	58236.9	ALLSDWITGK;DTEDILISK;INLIDSPGIVLSK;KPESVEAPETAVSAILAWCPK;VDFGGSWR	1;1;1;1;1	5	5	0.1173	21722;17360;37883;63712;11623	-	GTP binding domain protein OS=Echinococcus granulosus OX=6210 GN=EgrG_000576400 PE=4 SV=1	3.47948e+06	102338
869_1	tr|W6U214|W6U214_ECHGR	2.78177	NA	49757.7	FFFDLWR	1	1	1	0.0153	17179	tr|A0A068WYK6|A0A068WYK6_ECHGR	Wiskott-Aldrich syndrome protein family member OS=Echinococcus granulosus OX=6210 GN=EGR_10005 PE=3 SV=1	0	0
520_1	tr|U6IWR1|U6IWR1_ECHGR	10.9678	NA	49758.7	FEVIHAPGNETLNQVHDFLFTR;IAFQSTK;LYVVSR	1;1;1	3	4	0.0788	67615;67632;4672;1805	-	Expressed conserved protein OS=Echinococcus granulosus OX=6210 GN=EGR_01670 PE=4 SV=1	5.76778e+06	221838
127_1	tr|W6V933|W6V933_ECHGR	2.94838	NA	11962.2	SIPLLFVR	1	1	1	0.0769	12837	-	U6 snRNA-associated Sm-like protein LSm3 OS=Echinococcus granulosus OX=6210 GN=LSM3 PE=3 SV=1	0	0
1011_1	tr|A0A068X0E4|A0A068X0E4_ECHGR	3.81102	NA	15055.9	SQITIPLHNK	1	1	2	0.0763	24841;24840	-	Expressed conserved protein OS=Echinococcus granulosus OX=6210 GN=EgrG_000087900 PE=4 SV=1	839507	104938
1117_1	tr|A0A068WR58|A0A068WR58_ECHGR	3.19749	NA	11801.9	MIFYSFFK	1	1	1	0.0784	20310	-	U6 snRNA-associated Sm-like protein LSm2 OS=Echinococcus granulosus OX=6210 GN=EgrG_000231500 PE=3 SV=1	0	0
1013_1	tr|U6JHY6|U6JHY6_ECHGR	209.461	NA	116931	CFELDPK;CIPDMPQNLTIISR;CLVVYFAHR;DEAGFLLDSMGQPSSDADAVR;EEPSIPFWSR;EGEVAGSSRPK;FDLTPKDEVLLK;FQPLDYVR;GEDGLLFNLDGSEYYSESPEMFFR;GGDDASPHYVTEEDVEYER;GYAQTGDQEDR;GYAQTGDQEDRNPLETAILANDDLVFVK;IACVGKGEDGLLFNLDGSEYYSESPEMFFR;IDFVLVYK;IVDDVCNR;LHASWSTMIR;LTDMENHR;MNLFDIPEDYDNFFNPTER;MTYILYYSPNR;NPLETAILANDDLVFVK;QKEGEVAGSSRPK;RIDFVLVYK;RTGTCECTGPGTCPPVK;SFEPPTQQPAIGFSSVESFKPEEQLFTGIGFLQK;SIFKLPSPYR;SLVVDY…	1;1;1;1;1;1;1;1;1;1;1;1;1;1;1;1;1;1;1;1;1;1;1;1;1;1;1;1;1;1;1;1;1;1;1;1;1;1;1;1;1;1;1;1	44	102	0.468	10729;49583;25727;25726;62026;62027;30960;30958;30962;22575;40343;40345;17563;69755;69752;61823;61824;30438;71259;71262;71258;72637;15550;15204;28146;28145;16410;65112;65320;65113;65115;65140;65321;40508;55155;55156;37148;24980;55279;73438;73437;28542;28544;28543;17467;27529;27528;21990;22043;22044;21986;13598;71393;71394;51299;51303;73686;73687;73685;32549;32614;52212;52209;53877;53874;53876;538…	-	Anoctamin OS=Echinococcus granulosus OX=6210 GN=EGR_10154 PE=3 SV=1	3.76967e+08	6.85395e+06
1111_1	tr|W6U1G6|W6U1G6_ECHGR	2.52259	NA	19205.7	LTLILPR	1	1	1	0.0407	6287	-	Uncharacterized protein OS=Echinococcus granulosus OX=6210 GN=EGR_10249 PE=4 SV=1	334805	83701.3
864_2	tr|W6UM50|W6UM50_ECHGR	156.434	NA	84372.5	ADLVNNLGTIAR;AESTLTIIDTGIGMTK;ALLFVPK;APFDLFENR;ASFEPTCK;DIYYITGESK;DSSTMGYMSAK;EDQSEYLEER;EGLELPEDEEEK;EGLELPEDEEEKK;ELISNGSDALDK;ELISNGSDALDKIR;EMLSAEGEPNK;ESLANSAFIEVLK;ESLANSAFIEVLKK;FYEQFSK;GLEVLYMVDPIDEYAVPQLR;HFSIEGQLEFR;HLEINPDHK;HSQFISYPIK;IIPNKAESTLTIIDTGIGMTK;IKDILGNK;KHLEINPDHK;KLAELLR;LGIHEDSTNRK;LKEMLSAEGEPNK;LTTSPCCIVTSTFGWSANMER;NNDDEQYLWESSAGGSFTIRPCSEEPLGR;NPEDISQEEYGEFYK;RAPFDL…	1;1;0;1;1;1;1;1;1;1;1;1;1;1;1;1;1;1;1;1;1;1;1;1;1;1;1;1;1;1;1;1;1;1;1;1;1	36	58	0.5014	31608;31563;49418;4336;22054;12504;27347;26617;33909;40257;46422;31870;45863;45865;28315;40538;40587;46576;13006;64366;64369;37532;37531;21645;29260;29262;29263;29261;62641;62642;10255;29877;29879;7211;32286;32287;41791;65670;65671;65669;72137;72136;54618;54619;32026;32028;32025;32029;45027;45069;45065;45063;45066;56724;65049;496;57963;24939;47989	-	Heat shock protein HSP 90-alpha OS=Echinococcus granulosus OX=6210 GN=EGR_10560 PE=3 SV=1	1.51029e+08	3.77573e+06
1054_1	tr|A0A068WY65|A0A068WY65_ECHGR	30.5666	NA	152151	ADFASFASSR;AQDDLLAYVK;LQTEVSHLSAEK;QSECLLQVK;SAGQLVATQMAEHTALDAATLVR;SSSQTIAVDSTAK;TQEPIIQR;YHDVLSTTQLVR	1;1;1;1;1;1;1;1	8	9	0.0702	18741;23830;36368;36369;21802;64797;33737;14925;41112	-	Dynactin subunit 1 OS=Echinococcus granulosus OX=6210 GN=EgrG_001179500 PE=3 SV=1	4.34218e+07	529534
864_1	tr|W6U2C9|W6U2C9_ECHGR	2.2102	NA	67298.1	ALLFVPK;KILVEK	0;1	1	1	0.0219	4336;1473	tr|A0A068WYJ3|A0A068WYJ3_ECHGR;tr|A0A068X2C3|A0A068X2C3_ECHGR	Heat shock protein OS=Echinococcus granulosus OX=6210 GN=EGR_10425 PE=3 SV=1	0	0
300_2	tr|A0A068X0W4|A0A068X0W4_ECHGR	64.4756	NA	44547.4	AINLKEELVR;CQALVLAPTR;DAIMSDFR;DVIAQAQSGTGK;GIDVQQVSLVLNYDLPNRR;GIYQYGFERPSAIQQR;IGHLLNVK;KEELTLDGIR;LQQDLQVLPEGQHVVVGTPGR;MIKDPVK;QFYIQVK;QIQSVIQK;TATFTISILQK;VFDMMER;VLLSTDILAR;VSCIHSDLTQEQR	1;1;1;0;1;1;1;1;1;1;1;1;1;1;1;1	15	18	0.4504	27092;23409;13321;26385;62331;56284;56285;9880;26333;26330;63493;63492;6561;11737;12740;29433;11809;21542;47349	tr|W6UXB5|W6UXB5_ECHGR	RNA helicase OS=Echinococcus granulosus OX=6210 GN=EgrG_000150000 PE=3 SV=1	2.33525e+07	1.06148e+06
300_1	tr|U6JHC3|U6JHC3_ECHGR	12.2928	NA	46435	DVIAQAQSGTGK;KGVAINFVK;KLDYGQHIVSGTPGR;VLITTDLLAR	0;1;1;1	3	3	0.1141	26385;14453;48761;22477	-	RNA helicase OS=Echinococcus granulosus OX=6210 GN=EGR_03121 PE=3 SV=1	3.67661e+06	147064
1236_1	tr|A0A068WL21|A0A068WL21_ECHGR	2.98893	NA	72373.7	LQALLAEK	1	1	1	0.0125	9454	tr|W6U4W9|W6U4W9_ECHGR	Protein hook 3 OS=Echinococcus granulosus OX=6210 GN=EgrG_001149400 PE=3 SV=1	0	0
1290_1	tr|A0A068WA84|A0A068WA84_ECHGR	6.79325	NA	47180.6	LAFVTSTGR;LGVNYFFK	1;1	2	2	0.041	13195;15071	-	BTB:POZ domain containing protein OS=Echinococcus granulosus OX=6210 GN=EgrG_000765900 PE=4 SV=1	2.13244e+06	142163
1056_1	tr|A0A068W8I8|A0A068W8I8_ECHGR	3.57287	NA	118582	AVNLLDDQPVFSQSIR	1	1	1	0.0151	53392	tr|W6UPY9|W6UPY9_ECHGR	Vacuolar protein sorting-associated protein 18 homolog OS=Echinococcus granulosus OX=6210 GN=EgrG_000829300 PE=4 SV=1	5192.25	99.851
304_1	tr|A0A068WHY1|A0A068WHY1_ECHGR	20.8986	NA	24320.2	AAGISTDR;FVSDSGVATANR;LAGLVALSCWLPLHEK;QDEPGILAATK;QTATFIFLHGLGDSGSGWADTLR;SIPILQCHGK	1;1;1;1;1;1	6	6	0.3524	4474;29470;53533;24280;66085;24974	tr|W6UH50|W6UH50_ECHGR	Acyl protein thioesterase 1 OS=Echinococcus granulosus OX=6210 GN=EgrG_000465300 PE=3 SV=1	2.0805e+06	138700
998_1	tr|W6V6H0|W6V6H0_ECHGR	19.0323	NA	73706.4	FCLGLLSNVNR;GHQIELTR;LGGAAAGGASR;LISYIK;VLSQMGSPNHPCTSVS	1;1;1;1;1	5	5	0.0757	33632;13291;9553;1812;50763	-	Mothers against decapentaplegic homolog OS=Echinococcus granulosus OX=6210 GN=EGR_03247 PE=3 SV=1	4.06791e+06	135597
1050_1	tr|W6UBC0|W6UBC0_ECHGR	107.394	NA	148844	AALLNYHYK;AIQGATSHHLGQNFSK;ATSIQNSHILPAK;AYADDTDLETMR;EAPCVLIYIPDGATK;EFLWQEGHTAFASK;FNHWELK;GGPLNLGNFVNLR;HGLTPEGLR;IWAFNK;KGDDTAEWYTQVIR;KGDIIQLQR;KGFYICDQPYRPSHPSTWR;KPIVIDFSR;MGEVVVR;MLDDIHDLMLSR;NFINHNSVSSEACFGDSQIR;NPIPLQPLTPQK;QFILAQGSSK;QLVDVANWIR;SHPGLTHLGEALVK;TITAVLGEEAGLR;VFPIYDFACPIVDSLEGVTHALR;VQLSNLSTFTEAIHELDNFLAHR;YQVVVVPCGVTAK;YTALSLSK	1;1;1;1;1;1;1;1;1;1;1;1;1;1;1;1;1;1;1;1;1;1;1;1;1;1	26	31	0.2479	21032;21031;50606;38434;39513;49309;49408;14306;37986;14650;3866;50215;50222;19538;65348;19834;4423;42434;42438;63707;36594;20071;28910;42456;42455;35770;67944;68342;68341;40472;9298	-	Bifunctional aminoacyl-tRNA synthetase OS=Echinococcus granulosus OX=6210 GN=EGR_07317 PE=3 SV=1	1.41538e+07	164579
1052_1	tr|A0A068WG53|A0A068WG53_ECHGR	16.801	NA	22309.4	AFVEGYEK;IGETETDAK;IVIGLFGNTVPK;VFFDITLGNK	1;1;1;1	4	4	0.194	12651;13803;31623;25039	tr|W6UU91|W6UU91_ECHGR	Peptidyl-prolyl cis-trans isomerase OS=Echinococcus granulosus OX=6210 GN=EgrG_001015600 PE=3 SV=1	2.65875e+06	147709
123_1	tr|A0A068WJU1|A0A068WJU1_ECHGR	19.3049	NA	39899.7	EVIYPVTAISFHQR;HVLLWDLR;LYDVTSGGQR;PPAVTTGDQFK;WLAQFEK	1;1;1;1;1	5	5	0.1366	49643;18314;21193;25488;11513	tr|W6UFE7|W6UFE7_ECHGR	Mitotic checkpoint protein bub3 OS=Echinococcus granulosus OX=6210 GN=EgrG_000256300 PE=4 SV=1	4.07002e+06	254376
1298_1	tr|W6UNS3|W6UNS3_ECHGR	131.607	NA	148713	AGLEDTETVSGPR;ASLETFIEPTPGR;AWLLDTLR;DFFEVAIGK;EDLVVSASLDQSVR;EPLSGAAYQPEFK;FVVLEAPGTLAVR;GALAAALPAVPLR;GSLALLTACTHGLTQESEK;GVNWVVFHPTLPIIVSASDDR;GYPEVALHFVK;ILSVDPTEYR;IWDLAK;LALINR;LQTAYQLTTK;LTFLYLITGNLEK;MFLYLCDR;MVLPGLAHSPSLR;NIAPAGLSGIEEQVR;NPFEVCPASFTPIYR;NQPLFVSGGDDYK;QAIWSPDGQHVAFFSK;QDLLLSDSEDK;RPWILSGLHTGVIELWDYR;SCTLIDKFEEHEGPVR;SGAWAEEAGVFIYTTSTHIK;SGHGSGAVWIGR;SPDSYWVDNSPLAVDHVLAGSY…	1;1;1;1;1;1;1;1;1;1;1;1;1;1;1;1;1;1;1;1;1;1;1;1;1;1;1;1;1;1;1	31	33	0.3145	35841;40323;15082;16922;45219;41330;38045;29274;58733;64392;31726;27567;2282;48;25867;45595;22641;38338;46761;53287;41447;53815;31868;64224;64222;56363;61825;26997;70640;10620;67138;67139;41100	tr|A0A068WGT2|A0A068WGT2_ECHGR	Coatomer subunit alpha OS=Echinococcus granulosus OX=6210 GN=EGR_02349 PE=4 SV=1	2.20775e+07	269237
359_1	tr|A0A068WJM6|A0A068WJM6_ECHGR	7.38389	NA	92868.9	ASLPSGGGHSAAFR;NFLSPFETAYLGR	1;1	2	2	0.0324	34901;45121	tr|W6ULT5|W6ULT5_ECHGR	Conserved oligomeric Golgi complex subunit 5 OS=Echinococcus granulosus OX=6210 GN=EGR_03112 PE=4 SV=1	2.47589e+06	49517.9
704_1	tr|A0A068WBH1|A0A068WBH1_ECHGR	37.7259	NA	26539.1	ICTWTENSNHEDNSIDGSHVNCTK;KANEPAQSPLAPAQTSEGSELPNSSR;KGGDEVSLLVLDSEAR;NQTGQYIDEVK;SGDFVVEVNGENILSYSHPEVVELIK;TEGYGFSLIATK;VEAAESSEPTPVVASQPIDDEESKK;YCCMR	1;1;1;1;1;1;1;1	8	9	0.595	69860;69861;68479;50401;33731;70189;33278;68193;4396	-	Na:H exchange regulatory cofactor NHE RF2 OS=Echinococcus granulosus OX=6210 GN=EgrG_000743800 PE=4 SV=1	4.05308e+06	311775
1296_1	tr|W6UHB1|W6UHB1_ECHGR	22.5483	NA	11795.5	EQTLASYVR;FGSEIAYVK;QALNEQSSYGNQTNK;QALNEQSSYGNQTNKEQTLASYVR;QYPGTWSCVCGQR	1;1;1;1;1	5	21	0.451	19277;16328;50255;50209;50256;49806;49807;49786;50296;50208;50254;69101;68937;69114;68940;68938;69113;69112;69098;48061;47627	-	Dynein light chain OS=Echinococcus granulosus OX=6210 GN=EGR_04637 PE=3 SV=1	8.45944e+07	1.40991e+07
558_1	tr|W6UB07|W6UB07_ECHGR	3.81102	NA	35759.7	SCGQLIAPCLCDGSLK	1	1	1	0.0497	52746	tr|A0A068WRN0|A0A068WRN0_ECHGR	E3 ubiquitin-protein ligase 1-Mar OS=Echinococcus granulosus OX=6210 GN=EGR_06910 PE=4 SV=1	0	0
702_1	tr|W6U3X1|W6U3X1_ECHGR	2.26779	NA	55353	ADDILR	1	1	1	0.0121	191	-	Uncharacterized protein OS=Echinococcus granulosus OX=6210 GN=EGR_09856 PE=4 SV=1	259508	8650.28
128_1	tr|W6UTA1|W6UTA1_ECHGR	7.08619	NA	133419	FIDNFSTGSR;VLGLISTK	1;1	2	2	0.0146	24345;6575	tr|A0A068WDW8|A0A068WDW8_ECHGR	DFP domain-containing protein OS=Echinococcus granulosus OX=6210 GN=EGR_00453 PE=3 SV=1	507761	11038.3
556_1	tr|A0A068WE23|A0A068WE23_ECHGR	31.3109	NA	126885	FPDQVETVLR;GVSDADQDAR;LFPIIAGGLSSK;NISAYGDSHSHTGAK;NLDFAK;SGQPLSHAEVMR;SGSSGAIDEEGFR;VLEYLK	1;1;1;1;1;1;1;1	8	9	0.0725	28284;17343;28232;46416;421;34747;34744;34734;3186	tr|W6VC90|W6VC90_ECHGR	CLIP associating protein 1 OS=Echinococcus granulosus OX=6210 GN=EgrG_000910700 PE=4 SV=1	1.37439e+07	199187
700_1	tr|W6UUI4|W6UUI4_ECHGR	101.901	NA	41313.6	AKDYDWK;ATSPFLMVWR;AYQFNGSK;CNTSVLDEADTPQDHEFWTALPDVPVK;CWEPVGR;DSNMELFGSSK;EGLFVYIGK;ELEPPKEVIK;EVEGYESQLFK;FLQTCPNPFLPITVVTDEQAESFLK;HDIKPDDVYIILTK;HSTADEYGTAAYK;HVKPDEYRPR;LELTIVSEGSASK;LLYNVHFWIGK;LSDSSGKLELTIVSEGSASK;NALSNAHK;QSVHSGDVFILDLGSR;SSAAAFLQDLESK;SSAAAFLQDLESKR;TVELDTFLDDAAVQHR;VNQFTLEPVPSDEIGNFYNGDSYVICK	1;1;1;1;1;1;1;1;1;1;1;1;1;1;1;1;1;1;1;1;1;1	22	40	0.7486	11710;28529;11107;11108;71231;10382;28929;16929;26894;26895;26893;35665;70302;70301;49911;49912;49913;40121;40120;33875;33876;35977;38972;38973;39033;58510;58509;7916;51486;51096;51097;37750;37743;45464;54112;54111;54109;71333;71331;71332	tr|A0A068WDB3|A0A068WDB3_ECHGR	Severin OS=Echinococcus granulosus OX=6210 GN=EGR_08063 PE=4 SV=1	1.22636e+08	4.54206e+06
1294_1	tr|W6VBZ1|W6VBZ1_ECHGR	2.87199	NA	82064.7	FYQILR	1	1	1	0.0083	6974	tr|A0A068WB41|A0A068WB41_ECHGR	Dolichyl-diphosphooligosaccharide--protein glycotransferase OS=Echinococcus granulosus OX=6210 GN=EGR_00913 PE=3 SV=1	707326	21434.1
866_1	tr|A0A068WHF7|A0A068WHF7_ECHGR	9.32419	NA	13945.2	IEWTVLK;LFTHNILTSR;VGYPLAIK	1;1;1	3	3	0.2	9627;28168;8221	tr|W6UVQ6|W6UVQ6_ECHGR	Multifunctional methyltransferase subunit TRM112-like protein OS=Echinococcus granulosus OX=6210 GN=EgrG_000976100 PE=3 SV=1	2.49415e+06	415691
1230_1	tr|U6JKN1|U6JKN1_ECHGR	8.54042	NA	14831.7	LIGPVLVEQSLEEAR;LQEVESNIQK	1;1	2	2	0.2	49464;27301	-	Prefoldin subunit 6 OS=Echinococcus granulosus OX=6210 GN=EGR_09412 PE=3 SV=1	815758	101970
89_1	tr|A0A068WL99|A0A068WL99_ECHGR	21.0707	NA	32325.3	ANIWALK;GSCVTIEGPR;NTIIEAIK;TEEWDDVIAANR;VGIIGGSGLDDPEIFENQHEVR	1;1;1;1;1	5	5	0.2021	5738;19863;10303;40361;65185	-	Purine nucleoside phosphorylase OS=Echinococcus granulosus OX=6210 GN=EgrG_000622900 PE=3 SV=1	4.16658e+06	378780
1292_1	tr|W6UI27|W6UI27_ECHGR	2.96029	NA	103772	ASEGDSFESR	1	1	1	0.0108	20401	tr|A0A068WIG6|A0A068WIG6_ECHGR	Choline transporter-like protein 5-A OS=Echinococcus granulosus OX=6210 GN=EGR_03983 PE=3 SV=1	1.45675e+06	30349
554_1	tr|A0A068WIK5|A0A068WIK5_ECHGR	10.5197	NA	24186.3	LFDELDKDK;SALQSCSAEPLDDDHVK	1;1	2	4	0.1238	22992;22991;55138;55139	tr|G8IIR3|G8IIR3_ECHGR;tr|Q56J99|Q56J99_ECHGR;tr|Q869D3|Q869D3_ECHGR;tr|W6UZX2|W6UZX2_ECHGR	Immunogenic protein OS=Echinococcus granulosus OX=6210 GN=EgrG_000492700 PE=4 SV=1	5.58215e+06	328362
1232_1	tr|W6UQL7|W6UQL7_ECHGR	3.06516	NA	33001.3	SLFDQFEEK	1	1	1	0.0304	24264	tr|A0A068X0H3|A0A068X0H3_ECHGR	Mps one binder kinase activator-like 3 OS=Echinococcus granulosus OX=6210 GN=EGR_04445 PE=4 SV=1	5.53605e+06	369070
444_1	tr|A0A068WXZ9|A0A068WXZ9_ECHGR	33.2867	NA	29438.1	AFLDLSGLK;AFLDLSGLKEQVK;FTEIMK;GNLEASLSAALNR;KSDLISTPFGFQHVQHLGFNK;NVDTEAAPAPPASK;SDLISTPFGFQHVQHLGFNK;TDADKEFALNFIK	1;1;1;1;1;1;1;1	8	9	0.292	13832;41896;3341;34980;65435;37799;63538;44946;44988	-	PAK box P21 Rho binding OS=Echinococcus granulosus OX=6210 GN=EgrG_001173100 PE=4 SV=1	5.89425e+06	535841
82_1	tr|A0A068WAJ9|A0A068WAJ9_ECHGR	99.4449	NA	49655.1	EAAEFTAQVIVLNHPGEIGAGYTPVLDCHTAHIACK;EHALLAFTLGVK;FQEISSEMK;GITIDIALWK;GPTLLASIDLVEPPTRPVDKPLR;GPTLLASIDLVEPPTRPVDKPLRLPLQDVFK;ISGIGTVPVGR;KLIIAVNK;LIIAVNK;LPLQDVFK;MDAVDYSEK;MVPSKPMCVEVFSEFPPLGR;NMITGTSQADCAILVVAAGTGEFEAGISK;RFQEISSEMK;SGDAAIVR;STSTGHLIYK;STVAVGVIK;THINLIVIGHVDSGK;TIEKFEK;VETGIMKPGMIVTFAPVGISTEVK;YAWVLDK;YLVTIIDAPGHRDFIK	1;1;1;1;1;1;1;1;1;1;1;1;1;1;1;1;1;1;1;1;1;1	22	41	0.5978	73743;73744;73746;33994;33992;21359;23465;66482;66483;66481;66485;72612;18576;10132;10199;3428;13605;13604;18656;64163;64164;70391;70409;31412;31410;32316;4373;4372;4367;21952;8866;48185;48186;48212;48211;48210;9917;66743;66744;9907;54818	tr|A5LIC3|A5LIC3_ECHGR	Elongation factor 1-alpha OS=Echinococcus granulosus OX=6210 GN=EGR_02642 PE=3 SV=1	3.13712e+08	1.42596e+07
1756_1	tr|U6JKZ7|U6JKZ7_ECHGR	9.07087	NA	12210.8	HNGSITFLDVLEVAR;SIGCSIDGETPQAVIEK	1;1	2	2	0.2857	49956;53430	-	60S ribosomal protein L12 OS=Echinococcus granulosus OX=6210 GN=EGR_05898 PE=3 SV=1	0	0
1754_1	tr|U6J068|U6J068_ECHGR	42.8765	NA	25122	AAYLAYEEK;AEEDAYWEDNDKHVNR;ALNVTGDSPTEK;ALNVTGDSPTEKHPER;LNAQLAALAPK;LTQAQIAAAR;MLPELR;RDVDNLAPLTENPNR;TVEDAIK;VADDVIEAR	1;1;1;1;1;1;1;1;1;1	10	12	0.4521	18674;58042;58041;29937;52028;22129;17808;2864;51346;51344;3719;15064	-	Coiled coil domain containing protein 124 OS=Echinococcus granulosus OX=6210 GN=EGR_06933 PE=3 SV=1	1.99179e+07	1.24487e+06
84_1	tr|A0A068WLT7|A0A068WLT7_ECHGR	102.804	NA	83602.9	ATVVGFFK;DLKPENILLTEEGHIK;DSPASPPSASAHELFR;DSQTVYAMK;DVYECSGK;EASSVVEVLAR;FKEFLGDYQILEEIGK;GLVSIGEYVDDKQPCDDNETEVDIASLK;GVPNIVTLR;HLVLSMLNVDPK;IPFATGPNDPPEVILR;IYLILEFVK;KRPTASEILR;LGYGPDGFQK;LQAHEFFLPINWPDLVDLK;PLAPLIEPFPDDK;PLAPLIEPFPDDKK;QISTGNTFAVK;QPDGIQFR;RIELGPPQLTDSCWSSISDAAK;TELEPVGASFLAQR;TLDILHK;TLLPAHPSYSLQLPDAQTVK;VSPADFELLSIIGQGSFGK	1;1;1;1;1;1;1;1;1;1;1;1;1;1;1;1;1;1;1;1;1;1;1;1	24	29	0.4188	8571;54647;49886;17789;13470;25442;56676;56677;71351;14075;37718;37719;51638;23976;26136;26133;20235;63955;42081;47583;25789;24670;12700;65821;45223;6979;62001;62019;57545	-	Ribosomal protein S6 kinase OS=Echinococcus granulosus OX=6210 GN=EgrG_000641400 PE=3 SV=1	3.18183e+07	723144
353_1	tr|W6UD14|W6UD14_ECHGR	17.7176	NA	199049	FLDFPFR;FTTFLADLSQHQLFIDQLWQHR;IQTICEPTK;LINQSSASNPR;TDLLHPHAR	1;1;1;1;1	5	6	0.0329	12618;69248;69247;20800;27210;18852	tr|A0A068WTN7|A0A068WTN7_ECHGR	Phosphatidylinositol-4-phosphate 3-kinase C2 domain-containing subunit alpha OS=Echinococcus granulosus OX=6210 GN=EGR_05933 PE=3 SV=1	4.97009e+07	497009
1337_1	tr|U6JBL1|U6JBL1_ECHGR	45.0055	NA	68920.9	ALDEYYEQNFPDFVTLR;EASIYTGITLSEYFR;IIKDDFLQQNGYSDYDR;LPANYPLLTGQR;MQEILQEEK;NIIHFYDQAR;NIVEATAQSPR;VGHDNLVGEIIR;VLETEYDGEVTEHSMLQIWPVR;VTWAIIR;WIAPPGNYSITDK	1;1;1;1;1;1;1;1;1;1;1	11	13	0.2335	60889;60903;51994;60253;36437;24606;32650;32649;27156;35327;68112;8081;42572	-	H(+)-transporting two-sector ATPase OS=Echinococcus granulosus OX=6210 GN=EGR_04878 PE=3 SV=1	6.24218e+06	156054
446_1	tr|W6UH87|W6UH87_ECHGR	131.301	NA	75648.6	EGIHVSPLVEDKPLVDTVEGVGAVYDFFR;FALKEK;GASCVSGYYK;HICNEAELSVVVCDTPER;IGFYSGNITTVSEDMR;ILRPTIFTSVPR;IYDNVYER;KIVMADLK;KLIDASCSTPCLK;LAQGEYIAPEK;LIDASCSTPCLK;LIDEDGWLHTGDVGTWQEGCLK;LTDVPDMGLLAAR;LVLVTGAPIAPPVLR;NLIAVIAATQR;NPEMTAK;QKPCPLDGDGLITICYTSGTTGTPK;RQPSDQFIGWHDSPSSPYEWMTYEEVNEK;SAAGSNIGVITFNELLAR;SFWDSTVFSK;SLREPILDAQNKPSLEDICADPR;SLSEAANFMGFEK;SPLINQIFVDGDAHSTFPVALVVPEVEPLLK;SSHVTDFFYENTSYLR…	1;1;1;1;1;1;1;1;1;1;1;1;1;1;1;1;1;1;1;1;1;1;1;1;1;1;1;1	28	46	0.5994	71644;71643;1773;20914;61064;61063;61062;53039;39502;39501;19579;11282;44027;44028;29200;37631;67034;67035;38031;45143;45144;26076;26075;4460;68633;68413;72957;54211;54210;28253;68149;68148;41042;72289;72288;57568;57567;57585;57584;16107;61536;61569;61568;10765;53130;53129	-	Long-chain-fatty-acid--CoA ligase OS=Echinococcus granulosus OX=6210 GN=EGR_04798 PE=4 SV=1	3.55504e+07	1.07729e+06
369_1	tr|A0A068WL75|A0A068WL75_ECHGR	2.57359	NA	66758.3	TVIQTTDADR	1	1	1	0.0164	22804	tr|W6UKX7|W6UKX7_ECHGR	Phosphoacetylglucosamine mutase OS=Echinococcus granulosus OX=6210 GN=EGR_03362 PE=3 SV=1	298973	8542.09
86_2	tr|W6UGX7|W6UGX7_ECHGR	30.1244	NA	42204.7	DLKPENILIDER;FPSHFSSDLK;FYASQVVLAFEYLHHLELVYR;ILQAICFPFLVK;ITDFGFAK;LNYSFK;QVEHTLNEK;VMLVQHK;WEKPSQNTACLDDFDR	1;1;1;1;1;1;0;1;1	8	10	0.276	42218;42219;25715;25714;67743;41946;10097;3453;21321;20174;7843;57882	tr|A0A068WMG2|A0A068WMG2_ECHGR	cAMP-dependent protein kinase catalytic subunit alpha OS=Echinococcus granulosus OX=6210 GN=EGR_04421 PE=3 SV=1	4.65177e+06	202251
124_1	tr|W6USC8|W6USC8_ECHGR	41.1922	NA	45623.2	ADLDIFDETLHPMK;DLTVSTHEFTR;DRDCIIGQVK;EIQHISEREPENEDSDPSINVR;ILLCAILLASK;LLHGGPLYLGVANWK;QSWYLELLK;RPNTTTEMYLDCSTVSKPDSR;SRPLVLP;YYFDIR	1;1;1;1;1;1;1;1;1;1	10	13	0.3158	49236;34380;34381;28274;67701;67700;28974;49047;26776;66150;66153;4038;8995	-	Cyclin-Y-like protein OS=Echinococcus granulosus OX=6210 GN=EGR_00717 PE=3 SV=1	3.68583e+06	141763
1059_1	tr|W6U9W1|W6U9W1_ECHGR	5.5028	NA	19145.7	FTSEIEIVK;IPTCHFTVR	1;1	2	2	0.1078	19235;23491	-	Trafficking protein particle complex subunit 6B OS=Echinococcus granulosus OX=6210 GN=EGR_06993 PE=3 SV=1	625377	56852.5
489_1	tr|W6TZX3|W6TZX3_ECHGR	10.5197	NA	6681.76	ELDEEDIAFK;KPAKELDEEDIAFK	1;1	2	2	0.2333	28567;48900	tr|A0A068WUH2|A0A068WUH2_ECHGR	Uncharacterized protein OS=Echinococcus granulosus OX=6210 GN=EGR_10753 PE=4 SV=1	4.01127e+06	2.00564e+06
527_1	tr|A0A068WRM6|A0A068WRM6_ECHGR	2.16622	NA	77360.2	KGILLSQR	1	1	1	0.0115	11156	-	Run domain Beclin 1 interacting and cystein rich OS=Echinococcus granulosus OX=6210 GN=EgrG_000251200 PE=4 SV=1	0	0
1018_1	tr|W6VAD4|W6VAD4_ECHGR	4.21845	NA	67369.5	LFLEEFGVK	1	1	1	0.0151	20260	tr|A0A068WE47|A0A068WE47_ECHGR	RNA helicase OS=Echinococcus granulosus OX=6210 GN=EGR_01357 PE=4 SV=1	25852.8	807.901
1752_1	tr|W6UGK2|W6UGK2_ECHGR	13.2876	NA	39852	FDSVVLFGR;GNCPSFSISEYSTLR;INKLDLK	1;1;1	3	3	0.0868	17677;51208;7261	-	Uncharacterized protein OS=Echinococcus granulosus OX=6210 GN=EGR_04478 PE=4 SV=1	4.90663e+06	350473
525_1	tr|A0A068WI46|A0A068WI46_ECHGR	14.3307	NA	7773.81	ELMAALNCDDIQEEQVK;PCSEVVKELLK;QLDRDGSGTVSAK	1;1;1	3	5	0.5857	58455;58473;34146;35958;35957	-	Immunogenic protein OS=Echinococcus granulosus OX=6210 GN=EgrG_000474400 PE=4 SV=1	4.57345e+06	1.14336e+06
80_1	tr|U6JMB7|U6JMB7_ECHGR	11.7793	NA	22632.4	HEMEYLEVR;LGKEEGIAPEQSK;TVLFALEK	1;1;1	3	3	0.1508	28364;38734;11477	-	Transmembrane emp24 domain containing protein OS=Echinococcus granulosus OX=6210 GN=EGR_09144 PE=3 SV=1	2.96715e+06	247262
523_1	tr|A0A068WWZ9|A0A068WWZ9_ECHGR	10.2521	NA	26006.4	FGGPISEEEKK;LGAPAENDSDK;QELVDR	1;1;1	3	3	0.1186	29301;22560;2903	-	SAP domain containing ribonucleoprotein OS=Echinococcus granulosus OX=6210 GN=EgrG_000294500 PE=4 SV=1	1.76028e+06	146690
1364_1	tr|W6UPA0|W6UPA0_ECHGR	2.00731	NA	51424.7	IGLFNR	1	1	1	0.0131	1006	tr|A0A068WMB9|A0A068WMB9_ECHGR;tr|A0A068WK05|A0A068WK05_ECHGR	Platelet glycoprotein OS=Echinococcus granulosus OX=6210 GN=EGR_09887 PE=3 SV=1	2.22967e+06	131157
477_1	tr|W6UZZ5|W6UZZ5_ECHGR	21.6493	NA	21429.1	EICCYSISCK;GVNAVLFMVDAADRDK;IWDIGGQPR;NELHALLEK;SQLAGIPVLVLGNK;SQLAGIPVLVLGNKR	1;1;1;1;1;1	6	8	0.3089	35183;51292;51290;17753;19291;19287;39949;47155	tr|A0A068X0R3|A0A068X0R3_ECHGR	ADP-ribosylation factor-like protein 8B OS=Echinococcus granulosus OX=6210 GN=EGR_05865 PE=3 SV=1	4.07452e+06	339543
993_1	tr|W6UYJ6|W6UYJ6_ECHGR	3.17405	NA	150322	DGPFVPSLR;EHAVAVGVTTLSTDEMLDINK;ENISSVNTAK;FNEKENISSVNTAK;IHSLESQLEQK;LCNVPANTVVAIMAEGK;LLHKYPFLLPQLQVDR;SVGVETLHYLNDGLWQMRPVR;VTENFEVAK;YPFLLPQLQVDR	0;0;0;0;1;0;0;0;0;0	1	1	0.0877	15070;15069;63011;19033;47616;47615;34759;52971;52968;57852;66351;17495;43859	-	Malignant T cell-amplified sequence OS=Echinococcus granulosus OX=6210 GN=EGR_01340 PE=3 SV=1	189554	2283.78
993_2	tr|A0A068WE29|A0A068WE29_ECHGR	5.25985	NA	20354.7	CHEHIELFADPSGEVIFFR;DGPFVPSLR;EHAVAVGVTTLSTDEMLDINK;ENISSVNTAK;FNEKENISSVNTAK;LCNVPANTVVAIMAEGK;LLHKYPFLLPQLQVDR;SVGVETLHYLNDGLWQMRPVR;VTENFEVAK;YPFLLPQLQVDR	1;0;0;0;0;0;0;0;0;0	1	2	0.6923	64098;64101;15070;15069;63011;19033;47616;47615;52971;52968;57852;66351;17495;43859	-	Malignant t cell amplified sequence 1 OS=Echinococcus granulosus OX=6210 GN=EgrG_000827900 PE=3 SV=1	970600	97060
794_1	tr|A0A068WHR1|A0A068WHR1_ECHGR	2.35029	NA	22890.8	CAVEHHAFFR;FYASFR;GIPKPPTK;LGTRPVVEDTR;LQQFFR;NTSTGQSLR	0;0;0;1;0;0	1	1	0.2488	32468;4467;6897;30642;6932;13809	-	FERM C terminal PH domain OS=Echinococcus granulosus OX=6210 GN=EgrG_001079600 PE=4 SV=1	950684	59417.7
794_2	tr|A0A068WD32|A0A068WD32_ECHGR	15.7795	NA	24249.3	EWTPEEADMMFLDR;FFSAEPQK;FLPNYGVDMHLVK;GKDSENYTLGLTPTGILVYEGEQK;KQLEHGILQCTDDR;LRDEYTR;MAAELAAFLLQGEFGAYDSR;QLEHGILQCTDDR;QTETLELAILHEYQK;YLYVLQLR	1;0;1;1;0;0;0;0;0;0	3	3	0.5913	52509;13275;45920;67876;51093;51091;51092;13226;61705;61702;47705;53305;53766;19349	-	FERM central domain OS=Echinococcus granulosus OX=6210 GN=EgrG_001079700 PE=4 SV=1	1.08761e+06	83662.4
794_3	tr|W6UIB0|W6UIB0_ECHGR	5.25985	NA	33976.7	CAVEHHAFFR;FFSAEPQK;FYASFR;GIPKPPTK;KQLEHGILQCTDDR;LQQFFR;LRDEYTR;LVVAEENEQAR;MAAELAAFLLQGEFGAYDSR;NTSTGQSLR;QLEHGILQCTDDR;QTETLELAILHEYQK;YLYVLQLR	0;0;0;0;0;0;0;1;0;0;0;0;0	1	2	0.4122	32468;13275;4467;6897;51093;51091;51092;6932;13226;31597;31650;61705;61702;13809;47705;53305;53766;19349	-	Band 4.1-like protein OS=Echinococcus granulosus OX=6210 GN=EGR_04275 PE=4 SV=1	1.48966e+06	70936.3
287_1	tr|A0A068WAV7|A0A068WAV7_ECHGR	35.3053	NA	30847.3	AETYAWYYLR;AGQTDEGWQVLSK;DRNYQLK;GGPIAEDDEER;SLEIDEK;SLEIDEKDDGGR;VGEDGLSLREDETESVSVK;WGVGLYSNVPAMK;YKGGPIAEDDEER	1;1;1;1;1;1;1;1;1	9	12	0.321	36037;40368;40372;12335;27264;6706;35940;35936;59473;41374;40580;43388	tr|W6U4D6|W6U4D6_ECHGR	Uncharacterized protein OS=Echinococcus granulosus OX=6210 GN=EgrG_000950600 PE=4 SV=1	1.02229e+08	7.86377e+06
1177_2	tr|W6U9S4|W6U9S4_ECHGR	8.95742	NA	85065.3	ALQAMVHEMPQYQK;APSPQPPSTTR;CISDSLDSQCFPYLPGVQGSLSK;DLKEINGNSYK;DVDENSYALSR;EAASYNALVSITDYCLSACR;EINGNSYK;GFDPLTPLLHDLTLQSLTR;GLPSLASAPSFIQYYLPIK;GQEYELTDKDK;HKGDNPQLGQGLHK;IFLEHVFCPK;KADEIASGASSLR;LESLAEQIATLCVTLNEYPK;LRDVDENSYALSR;LSLTYK;MQDIMDTGVTLVENITK;NGGGAGWNWEVILGGTGVLTPK;QFVANLQNLVEYS;QISVSGCVR;SSNLELAQFIQLK;STVSADDSIFGETSMSDHCGPR;TGGSEGPAGGIPTSPDLSNR;VCYSVTQR;VGSFPKPTDQLAVPNSSDLR;VPDMNNR…	0;0;0;0;0;0;0;0;0;0;0;1;0;0;0;0;1;0;0;0;0;0;0;0;0;0;0	2	6	0.4747	50012;24027;24024;67365;67367;33031;32985;32216;63360;63359;11762;61232;61231;59794;59795;35512;35510;45747;33438;33442;33439;33437;34334;34338;63895;63894;46136;46140;46184;46183;1222;56157;56202;62063;62062;45574;15975;43958;43959;64815;55104;55103;55102;16264;61075;61074;7322;39019	-	Syntaxin-binding protein OS=Echinococcus granulosus OX=6210 GN=EGR_07043 PE=3 SV=1	2.07984e+06	47269.2
1177_1	tr|A0A068WW32|A0A068WW32_ECHGR	5.25985	NA	77444.3	ALQAMVHEMPQYQK;APSPQPPSTTR;CISDSLDSQCFPYLPGVQGSLSK;DLKEINGNSYK;DVDENSYALSR;EAASYNALVSITDYCLSACR;EINGNSYK;GFDPLTPLLHDLTLQSLTR;GLPSLASAPSFIQYYLPIK;GQEYELTDKDK;HKGDNPQLGQGLHK;KADEIASGASSLR;LESLAEQIATLCVTLNEYPK;LRDVDENSYALSR;LSLTYK;NGGGAGWNWEVILGGTGVLTPK;QFVANLQNLVEYS;QISVSGCVR;SSGPTTGVHVK;SSNLELAQFIQLK;STVSADDSIFGETSMSDHCGPR;TGGSEGPAGGIPTSPDLSNR;VCYSVTQR;VGSFPKPTDQLAVPNSSDLR;VPDMNNR;WVPYLDDLLEK	0;0;0;0;0;0;0;0;0;0;0;0;0;0;0;0;0;0;1;0;0;0;0;0;0;0	1	2	0.4965	50012;24027;24024;67365;67367;33031;32985;32216;63360;63359;11762;61232;61231;59794;59795;35512;35510;45747;34334;34338;63895;63894;46136;46140;46184;46183;1222;62063;62062;45574;15975;19449;19448;43958;43959;64815;55104;55103;55102;16264;61075;61074;7322;39019	-	Syntaxin binding protein 1 OS=Echinococcus granulosus OX=6210 GN=EgrG_001188600 PE=3 SV=1	3.97282e+06	101867
1175_1	tr|U6J9Y7|U6J9Y7_ECHGR	9.42358	NA	8264.26	AELPAELR;AELPAELRDL;LAFSCCVCK	1;1;1	3	3	0.2639	10109;23288;24401	-	Zinc finger protein 706 OS=Echinococcus granulosus OX=6210 GN=EGR_07284 PE=4 SV=1	3.78409e+06	756818
479_1	tr|A0A068WRG9|A0A068WRG9_ECHGR	12.4503	NA	8265.61	AEIWLGNVLK;ILEGIGHFISEDELGTGALEAGK;TVINVVEK	1;1;1	3	3	0.5541	24310;64825;10306	-	Expressed protein OS=Echinococcus granulosus OX=6210 GN=EgrG_000550400 PE=4 SV=1	305551	61110.2
285_1	tr|A0A068WNT9|A0A068WNT9_ECHGR	10.7123	NA	49908.8	CLCIKPDR;HEDHYDDIYLV;IYLASGSNTPLVR	1;1;1	3	3	0.071	18972;40359;39036	-	Palmitoyltransferase OS=Echinococcus granulosus OX=6210 GN=EgrG_000457700 PE=3 SV=1	2.65477e+06	147487
1401_1	tr|W6ULM1|W6ULM1_ECHGR	2.89329	NA	50609.5	IFSVTLR	1	1	1	0.0154	6821	tr|A0A068WRX7|A0A068WRX7_ECHGR	DUF5736 domain-containing protein OS=Echinococcus granulosus OX=6210 GN=EGR_06143 PE=4 SV=1	117458	6181.98
1715_1	tr|U6J9Q7|U6J9Q7_ECHGR	10.9784	NA	8389.97	EVYFAER;GVGVGSSYRYD;TLSPGQHAEHDGKPYCNKPCYQALFGPK	1;1;1	3	5	0.6133	10996;25372;71713;71714;71715	-	Cysteine rich protein 1 OS=Echinococcus granulosus OX=6210 GN=EGR_02747 PE=4 SV=1	2.8381e+06	473016
796_1	tr|A0A068WQL8|A0A068WQL8_ECHGR	23.9396	NA	107713	ESLSGLLAQPFQR;EVDVNQPK;IPQNLLAVFPQNLQR;KPIAEVQAK;YGILIR;YTTTDSIR	1;1;1;1;1;1	6	7	0.0611	41801;11887;52048;52047;14883;1718;13413	tr|W6ULZ2|W6ULZ2_ECHGR	DH domain containing protein OS=Echinococcus granulosus OX=6210 GN=EgrG_000214000 PE=4 SV=1	5.13021e+06	100592
1368_1	tr|W6U4U1|W6U4U1_ECHGR	2.19732	NA	9164.63	CYFIK	1	1	1	0.061	1486	-	Uncharacterized protein OS=Echinococcus granulosus OX=6210 GN=EGR_09555 PE=4 SV=1	0	0
1229_1	tr|W6U0E4|W6U0E4_ECHGR	2.4129	NA	22207.5	ELHELLLR	1	1	1	0.041	16809	-	Uncharacterized protein OS=Echinococcus granulosus OX=6210 GN=EGR_10672 PE=4 SV=1	9.63377e+06	802814
991_1	tr|U6J0E7|U6J0E7_ECHGR	12.4056	NA	24928.5	EGPVLHGK;NLIGIISMDEK;QTISNACGTVAILHALANNASALDLNSLPWLR	1;1;1	3	3	0.2277	6845;30026;72532	-	Ubiquitin carboxyl-terminal hydrolase OS=Echinococcus granulosus OX=6210 GN=EGR_02941 PE=3 SV=1	439521	62788.8
790_1	tr|U6JEW1|U6JEW1_ECHGR	2.34204	NA	24388.4	LLDFIQNK	1	1	1	0.0354	15231	-	Tetraspanin OS=Echinococcus granulosus OX=6210 GN=EGR_09512 PE=3 SV=1	837410	167482
1713_1	tr|W6UQV5|W6UQV5_ECHGR	10.1518	NA	35666.9	DGEEHVNSASGEHAESLEK;LNGTTQASGDVEGTR;RHYGFIQR	1;1;1	3	3	0.1273	58972;44642;19946	-	Nuclease-sensitive element-binding protein OS=Echinococcus granulosus OX=6210 GN=EGR_01213 PE=4 SV=1	1.56328e+06	82278.1
929_1	tr|U6JCB7|U6JCB7_ECHGR	16.0862	NA	95701.8	AAILSGDWNATEK;AALVDCIQR;AVEELAPTIDNPSNLAHIR;LLVGLNAK	1;1;1;1	4	4	0.0545	38233;17943;59682;6401	-	WD repeat-containing protein 26 OS=Echinococcus granulosus OX=6210 GN=EGR_04731 PE=4 SV=1	3.85387e+06	93996.7
1711_1	tr|A0A068WQU6|A0A068WQU6_ECHGR	7.38389	NA	29922.5	SFCLHVVGPR;VEVLEAIVNWETSNR	1;1	2	2	0.0947	26170;52238	-	Phospholipid scramblase OS=Echinococcus granulosus OX=6210 GN=EGR_07294 PE=3 SV=1	1.83709e+06	122473
792_1	tr|W6U831|W6U831_ECHGR	77.1699	NA	46897.1	AGVPNTCVK;DLLSSNVK;DQQIILHLLDIPEAK;EGEWVSMSVYSTGDHYGAPK;ELINDEKWVK;ENFTALTR;EVALASFK;EVFTPCVQNR;GAAVIGLR;IFKEQGEALDK;NVCIWGNHSNK;QFPDLSHAVVTK;SLFNLSADELVDER;SLFNLSADELVDEREVALASFK;VLVTGAAGQIAYNLSNMVANGNLFGK;VLVVGNPANTNCLIMSK;VVDGLSMDEWSR;YAPSIPKENFTALTR	1;1;1;1;1;1;1;1;1;1;1;1;1;1;1;1;1;1	18	47	0.4824	12853;12854;8967;51898;51899;62336;62335;62624;32489;13180;8408;31099;31101;2770;32722;32723;35662;35663;35733;35734;35730;35728;36377;36379;36376;36375;35480;35482;36374;36378;48294;48323;48325;48295;66100;66101;67997;67993;67991;67994;67995;54149;54147;54146;39960;39146;50979	-	Malate dehydrogenase, cytoplasmic OS=Echinococcus granulosus OX=6210 GN=EGR_08628 PE=3 SV=1	1.57278e+08	5.2426e+06
1179_1	tr|A0A068WWY2|A0A068WWY2_ECHGR	44.2987	NA	103440	ADYEEVEAFFK;AVQQALESISLNTR;FDYTEAR;HGGDDVYER;LFPLMSLSSGSAIGR;LLNLYER;LNPGAVGFYR;RVIGLAFSDLVR;VIGLAFSDLVR;VTINFDSK;YGLPTATSHPYVK	1;1;1;1;1;1;1;1;1;1;1	11	11	0.1145	36687;45798;10266;18029;46062;11472;21095;36601;27438;11632;41207	tr|W6UW20|W6UW20_ECHGR	Aminopeptidase OS=Echinococcus granulosus OX=6210 GN=EGR_07486 PE=3 SV=1	2.59818e+06	45582.2
857_1	tr|A0A068WM01|A0A068WM01_ECHGR	5.25985	NA	23246.8	SLYFMVSTTVFHNR	1	1	1	0.0664	50800	tr|W6UTN7|W6UTN7_ECHGR	Expressed conserved protein OS=Echinococcus granulosus OX=6210 GN=EgrG_000481800 PE=4 SV=1	453803	56725.4
1409_1	tr|A0A068WFY3|A0A068WFY3_ECHGR	13.8308	NA	38205	EISAAYEILSDAEK;FKEISAAYEILSDAEK;YGLAGLR	1;1;1	3	3	0.0671	46186;53701;2464	tr|W6UNP9|W6UNP9_ECHGR	DnaJ subfamily B OS=Echinococcus granulosus OX=6210 GN=EGR_02304 PE=4 SV=1	1.65291e+07	869953
1718_1	tr|W6V4G1|W6V4G1_ECHGR	2.05071	NA	20585.2	IVQLLK	1	1	1	0.0333	694	-	Uncharacterized protein OS=Echinococcus granulosus OX=6210 GN=EGR_04052 PE=4 SV=1	27943.9	1746.49
219_1	tr|W6UJH7|W6UJH7_ECHGR	12.8219	NA	48593.1	DGNVGLR;LLCPLAATLK;NAEETEFFTEHDEDSTSPV	1;1;1	3	3	0.0791	1490;21472;62050	tr|A0A068WVY4|A0A068WVY4_ECHGR	Amino acid transporter OS=Echinococcus granulosus OX=6210 GN=EGR_03484 PE=3 SV=1	7.0475e+06	414559
486_1	tr|A0A068WNZ2|A0A068WNZ2_ECHGR	8.33925	NA	15553.7	FFCPTCQR;RPLGNFR	1;1	2	2	0.1034	22488;8133	-	Lipopolysaccharide induced TNF alpha factor OS=Echinococcus granulosus OX=6210 GN=EgrG_000464600.1 PE=3 SV=1	4.89003e+07	1.22251e+07
1407_1	tr|A0A068WJZ9|A0A068WJZ9_ECHGR	24.4584	NA	23011.6	AGTIVPVAITCSLLHK;AMLEGYSSQK;GLVTHIDGSK;SKEEVIDEVK;VAAEIESYMK	1;1;1;1;1	5	6	0.2679	50173;50174;22351;16971;26464;24145	tr|W6UQC0|W6UQC0_ECHGR	UMP CMP kinase OS=Echinococcus granulosus OX=6210 GN=EgrG_001107800 PE=3 SV=1	3.05277e+06	218055
653_1	tr|W6UJ61|W6UJ61_ECHGR	48.2489	NA	36134.7	AMETLVDAGLVR;DLVVIPK;EDIFITTK;GLVQQAISAALDAGYR;GPFTLEDTWK;HIDTAFIYSNEAQIGATLK;KIPSIGLGTFK;LQLDYVDLYLLHWPVHLPR;MSESGIAR;RLQLDYVDLYLLHWPVHLPR;TPAQILIR	1;1;1;1;1;1;1;1;1;1;1	11	12	0.3684	32553;4104;13975;48906;27615;60279;25508;65298;7607;67244;67261;10898	tr|A0A068WT71|A0A068WT71_ECHGR	Alcohol dehydrogenase [NADP+] B OS=Echinococcus granulosus OX=6210 GN=EGR_03866 PE=4 SV=1	6.67113e+06	351112
480_1	tr|A0A068WT11|A0A068WT11_ECHGR	2.84517	NA	246752	ITPELVK	1	1	1	0.003	4908	tr|W6UJK6|W6UJK6_ECHGR	Multiple pdz domain protein OS=Echinococcus granulosus OX=6210 GN=EgrG_001151200 PE=4 SV=1	8.04786e+06	80478.6
1194_1	tr|U6JEZ5|U6JEZ5_ECHGR	8.83272	NA	23370.9	CLGASGVVDTR;DLKPVEIELK	1;1	2	2	0.101	23764;27035	-	Transmembrane emp24 domain-containing protein OS=Echinococcus granulosus OX=6210 GN=EGR_09048 PE=3 SV=1	1.17691e+06	69229.8
997_1	tr|W6UJ60|W6UJ60_ECHGR	22.5781	NA	37912.5	IVVLGLLPCGK;LLAANLSHPGGR;TYIEPLHCLNFSIPNDETQNVLWR;VLNGELDEVK;VVVMAVGTHNK	1;1;1;1;1	5	6	0.2	26021;28406;28402;70701;22580;25109	-	Platelet-activating factor acetylhydrolase IB subunit gamma OS=Echinococcus granulosus OX=6210 GN=EGR_04096 PE=4 SV=1	4.54667e+06	206667
707_1	tr|A0A068WTC7|A0A068WTC7_ECHGR	62.8121	NA	218911	AHQFSTEESNLSK;ATLTQMLNVIFQR;DAYVQALAR;EACCDGIEFLK;FASIATR;IACTFR;LNQTVQDDPEAFESR;LVICLAK;NILWEAGFK;QEDALILQETR;QETHSLSTALR;SVVVAVDK;TIEEAIAYYR;TLISVAQTDGNYLGHSWLHILR;TTQPQLQNLR;WIVTEALQR	1;1;1;1;1;1;1;1;1;1;1;1;1;1;1;1	16	16	0.0867	43342;46019;16036;36333;3232;3305;51950;5840;20004;34976;30630;5835;29726;66616;27942;22531	tr|W6UK96|W6UK96_ECHGR	Brefeldin A inhibited guanine OS=Echinococcus granulosus OX=6210 GN=EgrG_000708200 PE=4 SV=1	1.15131e+07	111778
1405_1	tr|A0A068WJN3|A0A068WJN3_ECHGR	3.19749	NA	28072.8	SDSGSVLSHR	1	1	1	0.0405	17885	-	Zinc finger RING type OS=Echinococcus granulosus OX=6210 GN=EgrG_001068400 PE=4 SV=1	0	0
283_1	tr|U6JGK0|U6JGK0_ECHGR	24.8504	NA	45197.4	EGGAETLDHSR;IATLSSLDDR;LNHQHTVQDLR;SVGVSSHGYDGGEGEGSSEAQSVVVK;VSDLGFDSASHR	1;1;1;1;1	5	7	0.1675	26152;26153;20887;37406;66792;33508;33506	-	NSFL1 cofactor p47 OS=Echinococcus granulosus OX=6210 GN=EGR_05653 PE=4 SV=1	6.1194e+06	278155
1173_1	tr|W6UGL0|W6UGL0_ECHGR	95.5289	NA	78685.7	FAPPVEADLWEGQLDATK;FMSIGHLLEPFPAIATLQYGFNSPNIPK;GCTFWNDIFPSLQR;GIEVNENWPDFR;HISAFTGDPGLVTLFGESAGAVSVGLHYLAPSSR;IDYLQLVQTR;IGGSSVQFYNFIHR;KHISAFTGDPGLVTLFGESAGAVSVGLHYLAPSSR;LDDLSGEVDFICPTLLFAR;LPASSVFDTLSELTLASTK;LPNSCWQYRPGNFDVTNPAAR;MILQSSSPLSR;RLPASSVFDTLSELTLASTK;SYPQSGSSAVCPYMEVDLYPVER;VDAYLGIPFAKPPVGNLR;VTSYNTGLQYNSLTSTSAFLDR;WALWQKPVAHEAGISFIK;YLAAMENVIVVSMQYR;YWANFAK	1;1;1;1;1;1;1;1;1;1;1;1;1;1;1;1;1;1;1	19	52	0.4347	57961;57962;71313;71329;51750;51776;51777;43279;43278;43219;43221;72577;72578;31069;48719;48718;48720;48695;72954;72956;72955;62031;62030;57849;57848;66245;66261;29210;61216;61217;68133;68132;68134;56616;56617;56618;56640;65947;65923;65939;65943;65920;65938;60103;60104;60105;60123;55530;55529;10216;10148;10219	-	Acetylcholinesterase OS=Echinococcus granulosus OX=6210 GN=EGR_07877 PE=3 SV=1	9.65109e+07	3.32796e+06
995_1	tr|W6UCY9|W6UCY9_ECHGR	62.9045	NA	27002.6	AAFTGDALLIR;AVLIDPVLETVQR;AVPLNLK;AVPLNLKDGCEDE;ELDLDLR;FVDIMQNLNLSYPK;IFSLPDDYFLFPAHEYSGR;MFAPTCQSVISATSGAR;QLFESTSCTFTYLIADAASR;STPGHTNGCFTYVLHSAR;TDLGQGSPEILYESVHSK;VLPLLAADGPFIFR;YAINTHLHADHVTGTGALK;YAINTHLHADHVTGTGALKK	1;1;1;1;1;1;1;1;1;1;1;1;1;1	14	22	0.751	24636;42130;42131;2674;42475;8832;50238;63549;52879;63658;63693;58452;58453;58451;58454;57425;57424;45760;58828;58827;58826;61451	-	Lactamase_B domain-containing protein OS=Echinococcus granulosus OX=6210 GN=EGR_05903 PE=4 SV=1	2.83397e+07	1.77123e+06
705_1	tr|W6V3L5|W6V3L5_ECHGR	66.654	NA	30407.5	EVLEATHAFIDVYK;FQCPQLALPFESK;LTFADCMLMPK;NGVESPLLNALK;NTVGACLICHQWLMVFR;NVLNFIR;QLQGQPEVR;QWDIPMDLVNIWR;RLEDYLQTQK;RLPAAFLPDLQLAASTPDELEALLAK;SADDYLHSCPSQLPPLK;YLLGEK;YMVEMDLIR;YVQSMYETTAFTVTCPLDR	1;1;1;1;1;1;1;1;1;1;1;1;1;1	14	24	0.6985	48969;48967;47145;47147;35569;31497;31498;31551;60526;8978;18497;18496;50342;33683;33680;69414;69415;56631;56633;56632;56630;1140;26048;63691	-	Chloride intracellular channel protein 5 OS=Echinococcus granulosus OX=6210 GN=EGR_04447 PE=4 SV=1	3.49808e+07	1.74904e+06
482_1	tr|U6J4Q9|U6J4Q9_ECHGR	14.2173	NA	10230.1	LGDISVLLFR;QYGNIWQCVVGK;YNTLVGISK	1;1;1	3	3	0.3407	23658;42059;15445	-	Dynein light chain OS=Echinococcus granulosus OX=6210 GN=EGR_02264 PE=3 SV=1	4.94632e+06	824386
1171_1	tr|A0A068WCA5|A0A068WCA5_ECHGR	2.18071	NA	80658.8	KIEALK	1	1	1	0.0081	174	tr|W6UAQ3|W6UAQ3_ECHGR	Sec1 family domain containing protein 1 OS=Echinococcus granulosus OX=6210 GN=EgrG_000767000 PE=3 SV=1	159192	4682.13
281_1	tr|A0A068WDN4|A0A068WDN4_ECHGR	73.5952	NA	73808.9	EEGFDYALGYTESDTGYDKPSK;EGGVDRDCVAPNKPIYGWTHTSNYK;EPATVESIGIDINK;GPSVISNYSAEAVVR;GPVILVDQYADNASK;IYVPENQVPTFTYTSLK;NSSSYEIDCPAK;NYEILVNNK;QLPLVLPDTGSQPTDPSAAR;QNPANPSVK;RLPNDFALIETIAK;SFAPELK;SNPVVDK;TYVADLGSASVSSSK;VFFDLK;VPALGEK;VPVKVPALGEK	1;1;1;1;1;1;1;1;1;1;1;1;1;1;1;1;1	17	18	0.3298	66354;70114;43710;46569;47834;58335;37943;21953;59732;13335;48142;48143;4519;2854;43048;3358;669;23908	-	Expressed conserved protein OS=Echinococcus granulosus OX=6210 GN=EGR_03176 PE=4 SV=1	9.16536e+06	254593
1597_1	tr|A0A068WK50|A0A068WK50_ECHGR	10.153	NA	8672.46	NYCWALAK;RFPNECEK;VGDCIMYR	1;1;1	3	6	0.3333	16908;16955;20093;20088;16308;16307	-	Uncharacterized protein OS=Echinococcus granulosus OX=6210 GN=EgrG_000663200 PE=4 SV=1	0	0
615_1	tr|W6UFG6|W6UFG6_ECHGR	6.42793	NA	23083.8	GLSLLQVR;VEDIEALSR	1;1	2	2	0.0817	9462;17248	tr|A0A068WPE2|A0A068WPE2_ECHGR	Proteasome assembly chaperone 2 OS=Echinococcus granulosus OX=6210 GN=EGR_05329 PE=3 SV=1	439801	36650.1
1270_1	tr|A0A068WT16|A0A068WT16_ECHGR	2.72197	NA	16090.1	LTIVALR	1	1	1	0.0486	4226	tr|W6V5R4|W6V5R4_ECHGR	Riboflavin kinase OS=Echinococcus granulosus OX=6210 GN=EgrG_001152500 PE=4 SV=1	92588	15431.3
1485_1	tr|U6JII8|U6JII8_ECHGR	5.88884	NA	13251.5	EYALTSGIIK;LVSSDDHEFYVK	1;1	2	2	0.1849	21163;41398	-	Elongin-C OS=Echinococcus granulosus OX=6210 GN=EGR_10345 PE=3 SV=1	771187	96398.4
1653_1	tr|W6UW67|W6UW67_ECHGR	66.4186	NA	115256	AENILLDSQLNVK;AFVNMGR;AGTSTGLGELEGTR;ALGSFLQGPSK;ASDAVVVVVEGK;EEATSGDASASAAVAK;EVSILQK;FTVEPATETPR;GEVSNDLLALLK;NPWGVHVTSTK;QASAPTQLIGGGK;QIYSKPR;QLVSAIDYCHSR;TASELMNEMK;TELPGISVTSPGQQQQHHR;VAENIVEDVVENVR	1;1;1;1;1;1;1;1;1;1;1;1;1;1;1;1	16	18	0.1761	42343;4657;36745;21822;26263;42718;5834;30986;32385;29575;29577;29682;9774;41089;25004;60448;60446;47712	-	Non-specific serine/threonine protein kinase OS=Echinococcus granulosus OX=6210 GN=EGR_07379 PE=3 SV=1	9.98589e+06	221909
1651_1	tr|W6U3C3|W6U3C3_ECHGR	24.0197	NA	87535.9	LGEEINSNLPEDEKPGEVK;LIVNESENK;NDLPLKK;SAFVMLR;SLSHAQGATLMAGFIK;VKEMGDQLTEDEER	1;1;1;1;1;1	6	6	0.0897	60367;17949;6389;6182;48869;50135	-	Sodium/myo-inositol cotransporter OS=Echinococcus granulosus OX=6210 GN=EGR_09523 PE=3 SV=1	5.92337e+06	211549
1483_1	tr|W6V9F6|W6V9F6_ECHGR	33.7442	NA	38540.7	FNDLTYVR;GLDFLCQR;ICDYGVAQK;KLGSGQFATVHHMR;LDFIANIK;QEEGFR;RNDVVYDFAVK;TTVVVNNTALQLK;VNEANRPNYTELLR	1;1;1;1;1;1;1;1;1	9	11	0.2676	17017;17062;16096;18400;47266;47265;12209;3197;35528;39592;50425	tr|A0A068WIV8|A0A068WIV8_ECHGR	Dual specificity mitogen-activated protein kinase kinase OS=Echinococcus granulosus OX=6210 GN=EGR_01740 PE=3 SV=1	60198190	2.61731e+06
1198_1	tr|A0A068W8W4|A0A068W8W4_ECHGR	10.5197	NA	57873.1	FVSTAMPVSSHADFQVIELSK;IEAWDSDLSTSDDLIAK	1;1	2	2	0.0735	63911;55299	tr|W6UP10|W6UP10_ECHGR	Delta-like protein OS=Echinococcus granulosus OX=6210 GN=EgrG_000847000 PE=4 SV=1	89740.5	3323.72
1272_1	tr|A0A068WVF9|A0A068WVF9_ECHGR	2.47148	NA	79802.5	LISIIQK	1	1	1	0.0096	5686	tr|W6UF51|W6UF51_ECHGR	ATP dependent RNA helicase DDX31 OS=Echinococcus granulosus OX=6210 GN=EgrG_000110700 PE=3 SV=1	446592	8756.7
617_1	tr|U6J5X0|U6J5X0_ECHGR	84.1656	NA	55932.4	EAGNIPK;EPLTESIATLIGHQR;FTETGTCHEGK;GFAFMPK;HVFGKPLKR;KPQMCVFVEGDR;KSGLFQEDLYPDTVAPVSSISCDAWFHGQDADPIK;LFTTGFSK;LGLNVAICEIAR;NWCEVIPFTVPR;QLALWDSSDLSK;SGLFQEDLYPDTVAPVSSISCDAWFHGQDADPIK;SGSALQPQPPSR;STHDTSFCAVNPK;VVDKLSDQVK;VWEIPEGGIGKEPLTESIATLIGHQR;YDSTDPQR;YFEYSPHDNQVYYLSR;YLAIITESSGGGGFTVIPIK	1;1;1;1;1;1;1;1;1;1;1;1;1;1;1;1;1;1;1	19	30	0.4545	1389;49803;32088;32087;4787;20278;20279;42763;42765;73749;73748;73747;10232;35701;45209;45208;37536;36546;73427;29528;42655;23516;23515;69929;69930;14728;60081;60082;58948;58947	-	Coronin OS=Echinococcus granulosus OX=6210 GN=EGR_03223 PE=3 SV=1	1.98763e+07	795050
484_1	tr|W6UEY5|W6UEY5_ECHGR	7.35277	NA	152944	LGLSAFLR;VFDPTLNLFR	1;1	2	2	0.0133	9039;29369	-	HECT-type E3 ubiquitin transferase OS=Echinococcus granulosus OX=6210 GN=EGR_08420 PE=4 SV=1	122459	1883.99
441_1	tr|W6V5T4|W6V5T4_ECHGR	8.77317	NA	101287	ENLGVKPIAPGPK;KESEENFGSVIR;TGTFMAAR;TNPQNVDIVGTVLAMR	1;1;0;0	2	3	0.0529	35234;39204;39205;7821;51435	-	Protein-tyrosine-phosphatase OS=Echinococcus granulosus OX=6210 GN=EGR_03538 PE=4 SV=1	468746	11160.6
441_3	tr|A0A068WT62|A0A068WT62_ECHGR	11.1759	NA	34543.2	CTQYWPDGMTSTFESAK;GYINASYVR;QIAPGPK;RPEYGSGGEALVSSFSTRPAYIATQGPLR;STVTDFLTMVCQQR;TGTFMAAR;TNPQNVDIVGTVLAMR	1;0;1;0;1;0;0	3	3	0.3226	58512;17796;17831;548;71163;50332;7821;51435	-	Receptor type tyrosine protein phosphatase O OS=Echinococcus granulosus OX=6210 GN=EgrG_001149600 PE=4 SV=1	3.81709e+06	347008
441_2	tr|A0A068WQQ3|A0A068WQQ3_ECHGR	3.07941	NA	35215.5	GYINASYVR;NCSVEVR;RPEYGSGGEALVSSFSTRPAYIATQGPLR;TGTFMAAR;TNPQNVDIVGTVLAMR	0;1;0;0;0	1	1	0.219	17796;17831;8329;71163;7821;51435	-	Receptor type tyrosine protein phosphatase O OS=Echinococcus granulosus OX=6210 GN=EgrG_001149950 PE=4 SV=1	107805	8292.67
799_1	tr|A0A068WIX7|A0A068WIX7_ECHGR	121.905	NA	109312	AAIIGLGVAYAGSNK;AELATDEYVPVTNLPLEGFVILTK;CAENIYR;DADSLLNK;DNSDDDLSDEDR;EYLELAGK;FLRPQYAR;FMALGLALTCLGR;IVPLALALCYISNPQLK;KDDIGVWGHEYVR;LAQGLTHLGK;LEEPNVYLYETALESLK;LLMTFDK;LNDESLAR;LSEHFLSLAR;NECDPALALLSSYVEHQTDVLSR;NIYENIQDPK;NLKPLTVTVR;QIAEVWDETEVSSSGK;QKEYLELAGK;QLAGYHCR;QLAYLLGK;SDYLIFYLTPAIQPR;SIFNEAASLPTSK;TITGFQTHTTPVLLAHGER;VCLYLISCTAYIPDPDNVK;VGQAVDVVGQAGRPK;VLDTLSK;YGATGTDVR;YLYAVDDHTQA…	1;1;1;1;1;1;1;1;1;1;1;1;1;1;1;1;1;1;1;1;1;1;1;1;1;1;1;1;1;1	30	36	0.381	39748;68118;68119;11703;8944;39230;11595;18264;40639;56299;56300;47388;47384;17578;58588;8520;11248;26256;26257;67907;30078;24184;24183;52387;26710;15918;10617;53270;37654;60050;62982;43505;43504;3734;12516;68663	tr|W6UXI7|W6UXI7_ECHGR	26S proteasome non-ATPase regulatory subunit 2 OS=Echinococcus granulosus OX=6210 GN=EgrG_000223600 PE=3 SV=1	3.42278e+07	600488
439_1	tr|W6U1B5|W6U1B5_ECHGR	38.5973	NA	117767	AFFPAGNLADILYAK;ASLPYLSK;DGVSEGQFDPVLR;FNPVGSR;FVENETIIR;ILFSLGPLDGK;LGGVNWLVNGLSGR;QYLDNSR;SAIFYDRPER;SVAAVIASISR;YGIDLK	1;1;1;1;1;1;1;1;1;1;1	11	11	0.1053	48370;9126;40370;3768;22886;25448;41648;9948;31345;19760;475	-	Protein argonaute-3 OS=Echinococcus granulosus OX=6210 GN=EGR_10859 PE=4 SV=1	1.13402e+07	180003
1612_1	tr|W6UZC3|W6UZC3_ECHGR	2.01338	NA	68513.8	QVNNLEK	1	1	1	0.0116	7334	tr|A0A068W9S4|A0A068W9S4_ECHGR	Rho-GAP domain-containing protein OS=Echinococcus granulosus OX=6210 GN=EGR_06183 PE=4 SV=1	910760	26021.7
1193_1	tr|A0A068WY29|A0A068WY29_ECHGR	6.84384	NA	210114	QTPQITDETEIK;SFEKPLESNQEGMDVEMTGVK;VHPDYVIATK	1;1;1	3	3	0.0222	39631;64817;24294	-	60S ribosomal protein L6 OS=Echinococcus granulosus OX=6210 GN=EgrG_000322250 PE=3 SV=1	165584	1780.47
1610_1	tr|U6JJC7|U6JJC7_ECHGR	18.311	NA	36826.8	HLDNEFVEDEDVK;HLDNEFVEDEDVKEK;SIDAVFVVK;VHQIYMNWR	1;1;1;1	4	8	0.1015	47785;47784;54580;54579;54603;14548;30866;30865	-	PQ-loop repeat-containing protein 2 OS=Echinococcus granulosus OX=6210 GN=EGR_04241 PE=4 SV=1	1.01437e+07	845312
1659_1	tr|U6J703|U6J703_ECHGR	31.6072	NA	107361	ATGVRPYAGK;FVIVSEEAIAK;FYITYFGGDKK;GGFVLHLGR;HNDLDDVGR;IVAVTGPEGER;QIWIDLGIPSER;TKLESDEEVR;VTTLPGAVAWR;VVSVGVPVEK	1;1;1;1;1;1;1;1;1;1	10	10	0.107	16654;28403;36200;13381;17699;23350;40861;28374;26122;16293	-	Alanine--tRNA ligase OS=Echinococcus granulosus OX=6210 GN=EGR_02223 PE=3 SV=1	2.62006e+07	459660
449_1	tr|W6U9X5|W6U9X5_ECHGR	16.9976	NA	71212.8	ALALSTLK;DFDMCIFR;DIVPTPPDNCCQVR;DLPAVGQPSR;EFFEEICRPLLLR;EFSIVDACPYSISLHWKPTDGGVVVGDR;GCALQAAICSSTR;HLSSVPASK;IGSFLIK;IVLRPR;KDLPAVGQPSR;KIVLRPR;KSGFDLTASYSHPEGLHIGDSR;LALVTESNLGTK;LGDLYSVELVGGGTR;LVNETTAIGIAYGYLK;NAFLDAAR;NVAFVSLGNSNLQVAIVAFNAGK;NVYETTEAK;SGFDLTASYSHPEGLHIGDSR;TEGGVEQPPTGGAASGTTETAVANQSPSQPTR;VISTAWDPCLGGR;VNSNGIFTICNACVLER;VVDVVLSVPSYYTDR;VVDVVLSVPSYYTDRER	0;1;0;0;0;0;1;0;0;0;0;0;0;0;0;1;0;0;1;0;0;0;0;0;0	4	7	0.4668	5842;21687;49917;49936;49916;17676;51318;71319;39191;39190;11732;3845;2637;25923;9274;65068;65067;30824;46057;51398;51417;51418;9103;64540;64541;18471;63063;63064;71229;41096;57602;57601;51067;51068;58235;58236	-	Heat shock protein OS=Echinococcus granulosus OX=6210 GN=EGR_06932 PE=3 SV=1	1.10664e+07	335345
449_3	tr|A0A068WE37|A0A068WE37_ECHGR	67.7136	NA	70836.2	ALALSTLK;DFDMCIFK;DIVPTPPDNCCQVR;DLPAVGQPSR;DVAVEATTLQLPHAQLVEFTEFQAR;EFFEEICRPLLLR;EFSIVDACPYSISLHWKPTDGVVEVERDEDAGEVAK;EHTFFHIVSDR;GGGFEILANEFGDR;GGGFEILANEFGDRR;HLSSVPASK;IGSFLIK;IVLRPR;KDLPAVGQPSR;KIVLRPR;KSDFALTASYSHPEGLHIGDSR;LALVTESNLGTK;LGDLYSVELVGGGTR;LLGSAAEQQMATNVANTITSFSR;LNQSDKLER;NAFLDAAR;NALEAYVYEMR;NVAFVSLGNSNLQVAIVAFNAGK;RTPSCVAFDGK;SDFALTASYSHPEGLHIGDSR;TPSCVAFDGK;VISTAWDPCLGGR;…	0;1;0;0;1;0;1;1;1;1;0;0;0;0;0;1;0;0;1;1;0;1;0;1;1;1;0;1;0;0	14	26	0.538	5842;19853;49917;49936;49916;17676;69842;51318;73896;73895;38837;38838;43559;43525;43558;49033;49035;11732;3845;2637;25923;9274;65255;65253;65256;30824;46057;65592;21667;9103;37286;64540;64541;30318;30322;63286;63284;20224;41096;63216;63205;63204;63215;51067;51068;58235;58236	-	Heat shock protein 105 (Fragment) OS=Echinococcus granulosus OX=6210 GN=EgrG_000917000 PE=3 SV=1	2.66155e+07	739320
449_2	tr|A0A068X599|A0A068X599_ECHGR	53.3226	NA	60662.7	ALALSTLK;ALASSCEGVR;DIVPTPPDNCCQVR;EFFEEICRPLLLR;EFSIVDACPYSISLHWKPTDGGVVVGDR;FTEADSRPSAIK;HLSSVPASK;IGSFLIK;IVLRPR;KIVLRPR;KLHPTSDPTFFVADLYDAQK;KSGFDLTASYSHPEGLHIGDSR;KVVESYLAGDPR;LETCLQQYTTER;LGDLYSVELVGGGTR;LHPTSDPTFFVADLYDAQK;LNQIDELER;LNQIDELERER;LNTFVDGVK;LNTFVDGVKK;QDLMNELTSYVYEMQSK;SGFDLTASYSHPEGLHIGDSR;TEGGVEQPPTGGAASGTTETAVANQSPSQPTR;VNSNGIFTICNACVLER;VVESYLAGDPR;YWICNEGEGAKK	0;1;0;0;0;1;0;0;0;0;1;0;1;1;0;1;1;1;1;1;1;0;0;0;1;1	13	19	0.5285	5842;18153;49917;49936;49916;51318;71319;35316;11732;3845;2637;9274;63909;63910;65068;65067;35976;46317;46057;61778;61777;23446;23487;40178;40180;15331;15380;22901;60038;63063;63064;71229;57602;57601;28380;42191;42193	-	Heat shock 70 kDa protein 4 OS=Echinococcus granulosus OX=6210 GN=EgrG_000938600 PE=3 SV=1	2.26464e+07	707701
1176_1	tr|W6UU57|W6UU57_ECHGR	5.25985	NA	58877.8	SVVISFDQLVTGVK	1	1	1	0.0263	44001	tr|A0A068WD85|A0A068WD85_ECHGR	Programmed cell death protein 4 OS=Echinococcus granulosus OX=6210 GN=EGR_00117 PE=3 SV=1	0	0
1487_1	tr|U6J7F4|U6J7F4_ECHGR	67.8255	NA	30953.1	DGDIEAIVK;DPVNVSQGVR;DSLGCLGILIK;EAMSFIR;FGDQVLK;GVFVTYVESDSPAAEAGLR;HGFVGLQLR;INSQYTVGMTGK;NGVLINSHLVEVNGINVLGLSDK;NGVLINSHLVEVNGINVLGLSDKK;NKHGFVGLQLR;PLYPSLEALTIGK;RSCGPTVDIIIR;SCGPTVDIIIR;VSPQNVR;VTLIPGFYYQHLSK	1;1;1;1;1;1;1;1;1;1;1;1;1;1;1;1	16	44	0.5417	13588;19513;19512;19589;19590;27376;7760;5272;5271;57608;57607;16975;33980;34895;34014;65527;65530;65528;65544;65545;65511;65543;65529;67093;67090;67091;67089;67109;67077;67105;67106;67092;67110;67094;67108;32250;39594;39593;38811;38810;29872;4892;4941;49822	-	Syndecan binding protein syntenin OS=Echinococcus granulosus OX=6210 GN=EGR_02526 PE=4 SV=1	1.88126e+08	1.10663e+07
1655_1	tr|A0A068WT51|A0A068WT51_ECHGR	5.25985	NA	26354.9	RSDVTHDSYVFAGDK	1	1	1	0.0633	50618	-	Diagnostic antigen gp50 OS=Echinococcus granulosus OX=6210 GN=EgrG_000520550 PE=4 SV=1	162377	11598.4
1243_1	tr|A0A068WM66|A0A068WM66_ECHGR	37.3011	NA	130768	DHLTWLGK;FTATATLGVIHR;LLHAAVSDTNDDVR;LLSILVR;QALGIAIETR;VETAILSITAK;VLSLPEDCR;VVLTLVDSVK;YYSIKPITQAGILLFHDR	1;1;1;1;1;1;1;1;1	9	11	0.0823	14108;33294;45617;45616;5629;19616;24513;20720;19703;61194;61193	tr|W6U9W9|W6U9W9_ECHGR	26S proteasome non-ATPase regulatory subunit 1 OS=Echinococcus granulosus OX=6210 GN=EGR_07286 PE=3 SV=1	9.22346e+06	204966
644_1	tr|A0A068WNU0|A0A068WNU0_ECHGR	41.0906	NA	36499	DENGQTWFR;DFPICPFTDLNR;DSGMQSNFDDFWR;FDLQAFNPEDIEVK;GNNSSSGQYFCR;INNEMR;LVVEGERDDSYFSR;SLHITLPIDGIYEGNHLHIQCSGGK;VENQTLSVHAK;VHNEMMNFMR	1;1;1;1;1;1;1;1;1;1	10	15	0.3962	24999;44119;48215;48216;49790;38260;38306;3754;49946;49945;69380;69382;69384;29581;34564	tr|W6UXT1|W6UXT1_ECHGR	Major egg antigen OS=Echinococcus granulosus OX=6210 GN=EgrG_000236500 PE=3 SV=1	9.34063e+06	424574
1286_1	tr|U6J0Y2|U6J0Y2_ECHGR	35.3701	NA	31181.2	ALEIEANNAFDQYR;GSWDSVHIVEVQEHSTAK;LTSTIIMWIDTNTHECGASALGGHFTR;MKEHEYPLIDQR;QHISNIGSMVEELESQMR;SFLNDVYFGSSK;SPWTNVYDPPLDDGVLPSER	1;1;1;1;1;1;1	7	18	0.4432	49468;49480;58532;58531;58530;70845;70844;46940;46937;59895;60213;60215;60214;59894;37582;37627;63222;63223	-	F-actin-capping protein subunit beta OS=Echinococcus granulosus OX=6210 GN=EGR_00374 PE=3 SV=1	1.5505e+07	861388
581_1	tr|A0A068WJX6|A0A068WJX6_ECHGR	41.1811	NA	58736.8	AGDVFNLLDDSDPNWWK;AMEPLIEAELEGVYTR;DFDGEKEK;GSNHNGEGLFPAQFVTR;ISEVDALK;KIFQQNPNVTMK;LTEALAQYHELVTAR;NLQVKEEEDIAK;TLDDNWAQILHISDTYAVGQPK	1;1;1;1;1;1;1;1;1	9	15	0.2365	58074;53900;14002;54166;54167;54164;54200;8902;41890;51173;51171;40228;40229;66493;66492	-	Expressed protein OS=Echinococcus granulosus OX=6210 GN=EgrG_000305200 PE=3 SV=1	7.22086e+06	328221
470_1	tr|A0A068WBT7|A0A068WBT7_ECHGR	5.07401	NA	116630	LFEIIANEK;VSDALHL	1;1	2	2	0.0145	19950;2657	tr|W6UJR6|W6UJR6_ECHGR	Non-specific serine/threonine protein kinase OS=Echinococcus granulosus OX=6210 GN=EgrG_000754400 PE=3 SV=1	255427	5434.62
583_1	tr|A0A068WW79|A0A068WW79_ECHGR	23.1729	NA	42930.5	ASSASPPQSTVK;DDSSNEPLPIR;GCSPVTYEHPR;IGATDTELHPVSEASSGAK;STTPTNNENHEVNIEASASSR;VNIEVNVK	1;1;1;1;1;1	6	6	0.2055	25388;30612;34168;55109;63247;11077	-	Uncharacterized protein OS=Echinococcus granulosus OX=6210 GN=EgrG_001191000 PE=4 SV=1	2.36802e+06	131556
1288_1	tr|W6UT35|W6UT35_ECHGR	10.0571	NA	14749.9	AIPNQTILTK;DNATINAATR;INEKPQIIAEYEQGK	1;1;1	3	3	0.2632	21412;17991;52255	-	Endothelial differentiation-related factor OS=Echinococcus granulosus OX=6210 GN=EGR_01489 PE=4 SV=1	742153	67468.5
1618_1	tr|U6JBX5|U6JBX5_ECHGR	110.328	NA	67715.8	AVELAANTK;AYDQIR;EMHLIGTLK;GHAAPILYAAWAEVGHLSESELLNLR;GSTVFYPSDAVSCER;GVSFTQHVLAVQEVPHSGKPDELLAK;GYDFPGISDQENWHGKPLGTSAAK;ICLTALPSGEDHVTVVAAGVTLFEALK;IIDPFTVKPIDAELIASSVK;IIGLDGDTK;INAAAICEEAR;LDNLVAIFDVNR;LGQSQPACLQHDLDCYR;LGSTYSR;LITVEDHGPEGGLSEAVAVALGER;LKPQEPVVDCK;LTTPPPYK;NIDSDLEGHPTPR;NSTFSIYLR;RVEAFGCHAIVVDGHNIPELLR;TGRPAVPVIYDANEDFVIGK;TIEHLEK;TLIVPSTLGK;TVPFVSTFAAFLSR;VEAFGCHAIVVDGHNIPEL…	1;1;1;1;1;1;1;1;1;1;1;1;1;1;1;1;1;1;1;1;1;1;1;1;1	25	38	0.5696	11199;3208;3209;17766;69854;69855;69856;50026;69619;69620;69618;67546;67547;69828;61621;61622;12080;29114;38964;59691;4082;65682;34818;11207;41996;41997;21518;66710;66711;66712;61738;61739;8622;17112;46375;46374;64707;64708	-	Transketolase OS=Echinococcus granulosus OX=6210 GN=EGR_09975 PE=4 SV=1	5.45257e+07	1.5146e+06
16_1	tr|A0A1W5YQC0|A0A1W5YQC0_ECHGR	3.95308	NA	46979.8	AYHEQLTVPELTNACFEPANQMVK;EDAANNYAR;EDLAALEK;FDLMYAK;LDHKFDLMYAK;NLDIERPTYTNLNR;RNLDIERPTYTNLNR;TIQFVDWCPTGFK;YMACCMLYR	1;0;0;0;0;0;0;0;0	1	3	0.2114	69798;69794;69806;16814;9601;9532;38457;38456;51240;51264;51262;55232;48074;32159	tr|W6V1C8|W6V1C8_ECHGR;tr|A0A068WVQ1|A0A068WVQ1_ECHGR	Alpha tubulin isotype 3 (Fragment) OS=Echinococcus granulosus OX=6210 PE=3 SV=1	0	0
1539_1	tr|U6JHM5|U6JHM5_ECHGR	22.4303	NA	15317.7	AYCPYSGFPVGAALIDPEGR;DFVAMAVAVDRDEFASPCGR;KTALSLLER;NMPLLLVNR;QVVCEFCYGK;TALSLLER	1;1;1;1;1;1	6	7	0.4857	61280;61281;62572;17216;19463;33411;10361	-	Cytidine deaminase OS=Echinococcus granulosus OX=6210 GN=EGR_09582 PE=3 SV=1	7.45171e+06	827968
1361_1	tr|W6UN57|W6UN57_ECHGR	23.8917	NA	38095.5	DSWEDEFDR;EAPVPLTHAEEEAK;FTHEFDGTK;LLSALAK;LVYMQIEDEQIK;SILPLLDSK;TASYILYR	1;1;1;1;1;1;1	7	7	0.2006	27904;45369;20221;815;44801;14979;15005	tr|A0A068WHP2|A0A068WHP2_ECHGR	Twinfilin-1 OS=Echinococcus granulosus OX=6210 GN=EGR_02670 PE=3 SV=1	6.09941e+07	3.0497e+06
472_1	tr|A0A068WF15|A0A068WF15_ECHGR	5.25985	NA	29326.2	SEHPGTDAPGLLAEQVALLR	1	1	1	0.0769	59963	tr|W6UPL8|W6UPL8_ECHGR	Syntaxin 6 OS=Echinococcus granulosus OX=6210 GN=EgrG_000863200 PE=4 SV=1	112226	6601.51
648_1	tr|W6UK03|W6UK03_ECHGR	33.7668	NA	80289.5	AEQTQYSAVFTK;DFFMHSNLPQTVLAR;GQVTTQQISIR;KISNLESIR;KVAVETLR;LLFSLDQYAK;LSYLEALAR;SQVEEVVQLR	1;1;1;1;1;1;1;1	8	9	0.1129	38085;52676;29885;18870;18869;11155;27884;17459;27231	-	Epidermal growth factor receptor substrate 15-like protein OS=Echinococcus granulosus OX=6210 GN=EGR_03693 PE=4 SV=1	2.81889e+07	741813
1488_1	tr|U6JHU3|U6JHU3_ECHGR	14.7904	NA	18531.5	ADDGLFDSDFIESR;GLEEFINK;VAGHPLVQSEK;YVDYEVR	1;1;1;1	4	5	0.2516	47741;13070;25747;25744;12698	-	Sorting nexin OS=Echinococcus granulosus OX=6210 GN=EGR_09117 PE=4 SV=1	2.87348e+07	2.87348e+06
474_1	sp|Q8T6C4|TDX_ECHGR	52.056	NA	21391.7	ADEFHQR;ALVDGELK;ALVDGELKDVSLSDYR;DVSLSDYR;EGGVQGMR;GCQLLACSTDSGYCHLAWNNVSR;GLFIIDDK;GLFIIDDKGVLR;HGEVCPANWQPGSK;LAPSFTCK;LLDAFQFTDK;QITINDLPVGR;SVDEALR	1;1;1;1;1;1;1;1;1;1;1;1;1	13	28	0.601	10319;7291;7288;52785;52786;13326;6701;68492;68510;68493;68535;68520;11466;36596;36595;47194;47192;47191;47193;11629;27867;29639;28602;29588;29638;28653;29637;4415	tr|A8BPG6|A8BPG6_ECHGR	Thioredoxin peroxidase OS=Echinococcus granulosus OX=6210 GN=TPX PE=2 SV=1 >tr|U6IUN6|U6IUN6_ECHGR TPx OS=Echinococcus granulosus OX=6210 GN=TPx PE=2 SV=1	1.12486e+08	7.03039e+06
1249_1	tr|W6UPX2|W6UPX2_ECHGR	2.00846	NA	38971.1	VPISEDSR	1	1	1	0.023	10335	tr|A0A068W8G3|A0A068W8G3_ECHGR	Hsp70-interacting protein OS=Echinococcus granulosus OX=6210 GN=EGR_01318 PE=4 SV=1	716603	37715.9
1367_1	tr|W6U8F2|W6U8F2_ECHGR	4.37738	NA	309841	IPLEPR;NIDELNDAVR	1;1	2	2	0.0057	1225;25320	tr|A0A068WHF2|A0A068WHF2_ECHGR	DUF3883 domain-containing protein OS=Echinococcus granulosus OX=6210 GN=EGR_10421 PE=4 SV=1	1.09278e+06	7976.48
1694_1	tr|A0A068WSL6|A0A068WSL6_ECHGR	17.5824	NA	32554.1	DRDFVNQR;IVEGNVVR;KSDFDSFIDLATDSLGWVK;SLPITAYTK;VPAWVVNASVK	1;1;1;1;1	5	6	0.1877	18156;9444;61378;61377;15396;26069	tr|W6UM10|W6UM10_ECHGR	Phosphatidylcholine transfer protein OS=Echinococcus granulosus OX=6210 GN=EgrG_001090900 PE=4 SV=1	1.09104e+07	681900
1615_1	tr|A0A068WHB4|A0A068WHB4_ECHGR	3.57287	NA	13983.1	GAAQAVMQKPGY	1	1	1	0.0902	29296	-	Uncharacterized protein OS=Echinococcus granulosus OX=6210 GN=EgrG_000480350 PE=4 SV=1	1.57571e+06	393928
1280_1	tr|A0A068WF25|A0A068WF25_ECHGR	30.3355	NA	82044.7	ADHLIEAALEAIR;ANLLAAWR;DAVTGECFR;LLPEPVTVHEVK;LPFGAAQIGSAFR;SKLEDLLK;STQEVPLKDAVAR;TYLSLPPIIAPYK	1;1;1;1;1;1;1;1	8	9	0.1219	40591;40593;11074;18454;37423;36014;12880;40151;43265	tr|W6V7M3|W6V7M3_ECHGR	Diadenosine tetraphosphate synthetase OS=Echinococcus granulosus OX=6210 GN=EGR_02591 PE=3 SV=1	5.28678e+06	125876
884_1	tr|U6JKY2|U6JKY2_ECHGR	17.9172	NA	12169.3	DFACNGNVVQHEQYGEVLQLQGDQR;KDFACNGNVVQHEQYGEVLQLQGDQR;KYGLVK;TLTTVQGIPDKFDK	1;1;1;1	4	5	0.4299	70370;71003;446;47076;47077	-	protein Translation factor SUI1 OS=Echinococcus granulosus OX=6210 GN=EGR_08508 PE=3 SV=1	2.53408e+06	506815
886_1	tr|W6UWQ7|W6UWQ7_ECHGR	11.5077	NA	27362.5	FSPITQK;HSFNHNSPALGCK;SATYLPEVAVEQGWNHQETIDSLLR	1;1;1	3	4	0.1891	6025;42909;70057;70067	tr|A0A068WQC7|A0A068WQC7_ECHGR	AMME syndrome candidate gene 1 protein OS=Echinococcus granulosus OX=6210 GN=EGR_07194 PE=4 SV=1	941747	62783.1
1282_1	tr|W6V8Z5|W6V8Z5_ECHGR	24.8184	NA	47014.7	FFQVDMR;HTFSTSANGGDPESR;LPNPLEPLWVDGADHNNIELFHEYTIR;STSEWVFQSAEK;TTPFVTTSK;YLCPLNR	1;1;1;1;1;1	6	6	0.1812	12650;47084;71720;39377;14758;12283	tr|A0A068WGZ7|A0A068WGZ7_ECHGR	Abhydrolase domain-containing protein OS=Echinococcus granulosus OX=6210 GN=EGR_02103 PE=4 SV=1	3.02668e+06	137576
1476_1	tr|W6UJV6|W6UJV6_ECHGR	3.51332	NA	82975.5	MALQDLNAR	1	1	2	0.0125	17292;17294	tr|A0A068WF90|A0A068WF90_ECHGR	Transmembrane protein OS=Echinococcus granulosus OX=6210 GN=EGR_06689 PE=4 SV=1	1.20795e+06	38966.2
888_1	tr|W6UY68|W6UY68_ECHGR	37.7584	NA	61788.5	DLGHENCHLAPCSNTAIR;LQTNCIIGTVHLR;NDVPVFTTTNLANAVADSTQK;NTFGWQR;QLFHEYNIHCTTIQPEFEDNIEQNPETCLYDCGPNQK;SLPEYTIVAR;SSEKDLGHENCHLAPCSNTAIR;VHDLHVWK;YCFCFR	1;1;1;1;1;1;1;1;1	9	15	0.2234	59775;59774;59773;45591;45590;62442;62459;62457;62440;10732;74212;24687;66646;17366;13205	tr|A0A068WEW9|A0A068WEW9_ECHGR	Zinc transporter OS=Echinococcus granulosus OX=6210 GN=EGR_01629 PE=3 SV=1	6.60524e+06	330262
1698_1	tr|U6JA70|U6JA70_ECHGR	5.25985	NA	85649.6	YIDTEHGASQAR	1	1	1	0.0156	36691	-	Protein transport protein SEC23 OS=Echinococcus granulosus OX=6210 GN=EGR_03928 PE=3 SV=1	40132.5	1114.79
1284_1	tr|W6VAP8|W6VAP8_ECHGR	36.5468	NA	21814	CHLDIAQR;DIVYPAEIVGQR;EFSIGHEK;ILPKPR;LVGELEKK;MIYFCGAK;TAPTPLEEEIAGTLVDLQSHEDMSELVK;TITGLYK;TLTAVHQAILK;TYHLLHNR	1;1;1;1;1;1;1;1;1;1	10	12	0.5445	16266;37367;12915;1187;11153;15155;71099;4717;27717;27718;18418;18417	-	40S ribosomal protein S7 OS=Echinococcus granulosus OX=6210 GN=EGR_01477 PE=3 SV=1	2.29285e+07	1.43303e+06
585_1	tr|W6U6N0|W6U6N0_ECHGR	22.4699	NA	56340.3	EYCPLAFQNLR;FNVDTNDYWESFTR;FQPFTGDLNPISEFYAFR;HGGANADQITTVRPEVYGR;LLVTYNR;YQPLWDSVSSK	1;1;1;1;1;1	6	6	0.1594	40007;53151;61477;59277;9130;34639	-	Phosphatidylinositol-5-phosphate 4-kinase type-2 alpha OS=Echinococcus granulosus OX=6210 GN=EGR_08276 PE=4 SV=1	4.63955e+06	220931
339_1	tr|W6U5H9|W6U5H9_ECHGR	8.2218	NA	28886.4	GQDFFELK;ICIYNLK;NPIQVAK	1;1;1	3	3	0.0876	14852;11640;3386	tr|U6JHZ5|U6JHZ5_ECHGR	Uncharacterized protein OS=Echinococcus granulosus OX=6210 GN=EGR_09300 PE=4 SV=1	2.85428e+06	203877
288_1	tr|A0A068WTI4|A0A068WTI4_ECHGR	72.1474	NA	98816.7	AFDDNQVCGGPQR;CPEYIGWR;CQGETEFTK;DIANSFTVVTK;DISVIFAIDAK;EMLGTDEVR;HILSLTSDFAEFEQK;IDFTFQSK;IVLFATDGGFHLAGDGR;KIVLFATDGGFHLAGDGR;LAAFLPSAAVGTLTDSSTNIVNLLR;LAGLIKPPPK;TCQLTYELDR;TILSRPSGNLDSPEGGLDALLQVAR;VFPLYEK;VQIIDEVGEESK;VSVTPTR;YSDAVYIHR	1;1;1;1;1;1;1;1;1;1;1;1;1;1;1;1;1;1	18	21	0.23	42647;20164;21423;27703;27520;18151;52398;52400;14954;51895;55192;55195;67219;67218;17385;33970;67593;9970;36559;2923;23064	tr|W6USA6|W6USA6_ECHGR	Integrin beta OS=Echinococcus granulosus OX=6210 GN=EgrG_000528400 PE=3 SV=1	2.4075e+07	601874
337_1	tr|W6UJW6|W6UJW6_ECHGR	3.57287	NA	60629.8	GFFLFVEGAR	1	1	1	0.0181	24278	-	Alkaline phosphatase OS=Echinococcus granulosus OX=6210 GN=EGR_03839 PE=3 SV=1	82057	2829.55
1480_1	tr|A0A068W7P5|A0A068W7P5_ECHGR	19.2396	NA	45510	FAQDTSGSRPPK;FAQDTSGSRPPKENEK;FVAPLAATLK;SGMSCASTFYCVIYTEYMTIK	1;1;1;1	4	8	0.1108	33515;53081;53080;53114;53115;17218;66839;66838	-	Amino acid transporter OS=Echinococcus granulosus OX=6210 GN=EgrG_000819900 PE=3 SV=1	13081030	872069
587_1	tr|W6VD92|W6VD92_ECHGR	53.6816	NA	105534	FAETEGHFYAK;FAFLLHSWR;HGSSISDYEIFEALPR;KETLAAAFHGTALACK;LASGEGDLSTTEAEK;LLCVFGAADR;LLYATADLR;LRDDYLPVHGIR;SYISFDIIR;VDLPPLK;VLVDYFGFNVK;YVMNITDIDDK	1;1;1;1;1;1;1;1;1;1;1;1	12	15	0.1441	34011;26602;26600;53894;50428;44737;22940;17461;42170;42169;42171;22371;4037;34083;35568	tr|A0A068WAU2|A0A068WAU2_ECHGR	Cysteinyl-tRNA synthetase OS=Echinococcus granulosus OX=6210 GN=EGR_00193 PE=3 SV=1	4.03831e+06	66201.8
31_1	tr|A0A068X1Z6|A0A068X1Z6_ECHGR	5.42144	NA	48789.3	IPVPSDVDSPR;SGYTALPWVR	1;1	2	2	0.0495	26877;24746	-	Clathrin coat assembly protein ap 1 OS=Echinococcus granulosus OX=6210 GN=EgrG_000044900 PE=3 SV=1	1.16795e+06	41712.5
1133_1	tr|A0A068WIM4|A0A068WIM4_ECHGR	18.118	NA	121259	DGRPLVNYGNDILAEGDGELLR;GYGQLNIDWFR;LGELVELACDVR;QNQPLAIR;SNYRDEEIQMNVK;VIVGEKPR	1;1;1;1;1;1	6	6	0.0672	65233;37849;38146;12537;48708;10066	-	Tyrosine protein kinase otk OS=Echinococcus granulosus OX=6210 GN=EGR_03072 PE=4 SV=1	1.61811e+06	29420.2
1279_1	tr|W6U5G5|W6U5G5_ECHGR	2.07442	NA	58044.1	LQTLPR	1	1	1	0.0118	1357	tr|A0A068WVF4|A0A068WVF4_ECHGR	Tyrosine-protein kinase OS=Echinococcus granulosus OX=6210 GN=EGR_08791 PE=3 SV=1	444988	13484.5
33_1	tr|A0A068WFS7|A0A068WFS7_ECHGR	131.279	NA	137676	ASSVILGPHLSR;DIAAGPYHSAAITTAGR;EFFILIMR;ELLNPVYGMFK;FANWLVQR;GPWLSHESSPSSSGNSDDLAIIGVYTGGNHCFAVTHHSGLACPTPIDFR;GVTFVACGETHSALLTK;HTLVLVTNPSK;IPLIPSGGEVVVTQENK;ITIQPNSSGDDFLPVAHTCYNILDLPK;KFANWLVQR;KFSSTDATAADISDATYSLEAYSMHTALR;KNTNYQGEYWDQHPVIK;LACGYQHTLALDSEGLVYSSGSNEFGQLGHCR;LIRPLVEVISRPR;LLGEEPTLEDLKELDPVVAK;LLVFGCGVDGQLGLLNR;LSQDLAMEK;LVANLNNFVAYLCSSK;QQYVEMYLNFR;RGVTFVACGETHSALLTK;RLESAFGSIG…	1;1;1;1;1;1;1;1;1;1;1;1;1;1;1;1;1;1;1;1;1;1;1;1;1;1;1;1	28	37	0.3544	30292;30291;49954;19401;34690;17365;75124;53090;53089;53091;28611;28612;52794;70987;25554;25556;71399;60909;60911;72926;72928;46546;46545;62494;54150;54151;17416;53678;43931;57093;66392;28200;43345;10369;16811;58705;51993	tr|W6V8P2|W6V8P2_ECHGR	E3 ubiquitin protein ligase HERC4 OS=Echinococcus granulosus OX=6210 GN=EgrG_000424000 PE=4 SV=1	5.13405e+07	950750
1131_1	tr|A0A068WVR4|A0A068WVR4_ECHGR	18.8589	NA	38456.6	DLEAEISSGDNTVR;KVVNPELYLISDQTGAVCGR;LCQAVVSDLVR;VVNPELYLISDQTGAVCGR	1;1;1;1	4	4	0.1304	44637;62666;31724;60260	-	Protein XRP2 OS=Echinococcus granulosus OX=6210 GN=EgrG_001174400 PE=3 SV=1	0	0
880_1	tr|W6UR23|W6UR23_ECHGR	37.6279	NA	45364.4	FHSDYHPEAYDR;FQSWVK;FVCILGTPHISLLR;GTAVAPIR;GTIYGAFR;LPGACLIAPPPK;MEEWYFAK;QPDFFALITSPNHPHCLAFR;RDFLHEAVR;TLPLNASWYK	1;1;1;1;1;1;1;1;1;1	10	10	0.2675	46078;4662;48729;4156;9377;30114;21690;64991;24281;27572	tr|A0A068WUN7|A0A068WUN7_ECHGR	Beta-1,3-galactosyl-O-glycosyl-glycoprotein beta-1,6-N-acetylglucosaminyltransferase OS=Echinococcus granulosus OX=6210 GN=EGR_09267 PE=4 SV=1	2.00727e+07	716882
1611_1	tr|U6J284|U6J284_ECHGR	20.9373	NA	43116.5	FQGMAYGVGTQK;LLTSQNVPR;LPDQQLAR;LSLVLPDGR;SCNLEHLIDKR	1;1;1;1;1	5	5	0.1256	33259;17034;12583;14122;38681	-	Protein DDI1 OS=Echinococcus granulosus OX=6210 GN=EGR_00531 PE=3 SV=1	1.70676e+06	113784
1521_1	tr|W6UA63|W6UA63_ECHGR	45.1721	NA	36768.2	FTGHNGDVLSVAFSADNR;GTLDGHSDWVTQLATNAQHPELLLSSSR;IHVWQFMHTAE;IWNLEDK;LWNTLGVCK;TLIIWELQGQQGK;VEPAINTESK;VLVEDLR;YLYTLPGGAEINALCFSPTR;YTFDNEGHTDWVSCVR;YWLCAAAGPSIK	1;1;1;1;1;1;1;1;1;1;1	11	16	0.4576	56126;56125;71009;71008;39380;39379;11252;20885;45046;20647;7248;63030;63032;57946;57948;36105	-	Guanine nucleotide-binding protein subunit beta-2-like protein OS=Echinococcus granulosus OX=6210 GN=EGR_07740 PE=3 SV=1	1.19751e+07	598753
610_1	tr|W6UT85|W6UT85_ECHGR	116.001	NA	105694	ACEIISAMSQPIDLANKDVLLK;ADLVEEIESGGSK;AFSDAMEVIPYTLAENAGLNPIQTVTELR;ALIAGGGAPEIEISQK;AQDIEAGDGTTSVVVLAGSLLDASAK;DAVNDLALHYFGK;DSNIVAAK;DVERDEVEFICK;GDVTITNDGATILK;GLHPTVISEAFQLAASK;HSNGEVNCGINVR;IALVQFCISPPK;IASTSLNSK;IDDVINAVR;KLGGTIEDAQLIDGLLLNQK;KSGANVILVQK;LAHLANQTTGLEQYCLR;LGGTIEDAQLIDGLLLNQK;QYILNIVK;SGANVILVQK;SLHDALCVIR;TLNCVPAASVDHLTPEVLGK;TVSVLLR;VTGIQNK;VVSQYSSILSPIAVDSVLAVTDSNDPESVSLSD…	1;1;1;1;1;1;1;1;1;1;1;1;1;1;1;1;1;1;1;1;1;1;1;1;1	25	40	0.3621	65797;35952;71551;46766;66520;66519;42674;5871;46177;46178;40331;52499;52527;42293;42292;42290;42360;38103;38104;11464;16427;16382;61274;61273;25248;57989;57991;58005;58594;58593;15236;14342;17109;27011;27012;60952;60953;4335;2916;73256	tr|A0A068WG86|A0A068WG86_ECHGR	T-complex protein 1 subunit delta OS=Echinococcus granulosus OX=6210 GN=EGR_00428 PE=3 SV=1	3.06294e+07	600576
1275_1	tr|W6V8A6|W6V8A6_ECHGR	28.5198	NA	20128.2	EIPEGSIEDLGDLK;EIPEGSIEDLGDLKR;FELMELIPK;FTTSVIGLDTYGIDLK;MNSVEQLADEGSSK;NLPEIFEK;SATYEYSPR	1;1;1;1;1;1;1	7	8	0.3923	45079;49930;22823;51839;44107;44108;15178;19717	-	Density-regulated protein OS=Echinococcus granulosus OX=6210 GN=EGR_02540 PE=4 SV=1	1.09641e+07	1.37052e+06
882_1	tr|W6UU22|W6UU22_ECHGR	2.48259	NA	36231.4	RLEEAIVR	1	1	1	0.0252	14978	tr|A0A068W7H5|A0A068W7H5_ECHGR	UBX domain-containing protein 1-A OS=Echinococcus granulosus OX=6210 GN=EGR_00077 PE=4 SV=1	282920	15717.8
165_1	tr|A0A068WUM6|A0A068WUM6_ECHGR	49.3936	NA	87718.8	ANLQVLR;AYYNLLNTIER;DTHFIDFK;FMTHNEAVAAIR;FSWSDAFTGEQHNQR;KAEGNPWSAPTFLPAEIELPK;LPVIPIGLK;NLSYNVLK;QLNELFVILRPYIK;SQYYQAQINHK;WSQPYTVQLAR	1;1;1;1;1;1;1;1;1;1;1	11	13	0.1612	5620;37926;16775;37355;53580;63952;63954;13089;13090;13138;51901;38416;36754	-	Rhophilin 2 OS=Echinococcus granulosus OX=6210 GN=EgrG_000179600 PE=4 SV=1	4.53089e+06	92467.1
39_1	tr|A0A0K1EUI9|A0A0K1EUI9_ECHGR	2.85506	NA	15713.8	FADLLK	1	1	1	0.0432	397	tr|A0A0N9JVG3|A0A0N9JVG3_ECHGR	NADH dehydrogenase subunit 1 (Fragment) OS=Echinococcus granulosus OX=6210 GN=ND1 PE=3 SV=1	588896	294448
926_1	tr|A0A068WHX2|A0A068WHX2_ECHGR	19.7838	NA	18453.2	HAVGVIVNK;HAVGVIVNKR;HGTLPTSVYMR;REPVGPRPAHLVR;RGDIVDIVGDGGVQK	1;1;1;1;1	5	6	0.3063	12358;21052;31815;31813;43635;45691	tr|W6UIS0|W6UIS0_ECHGR	60S ribosomal protein L21 OS=Echinococcus granulosus OX=6210 GN=EgrG_000582200 PE=3 SV=1	4.98611e+06	623264
346_1	tr|A0A068WHM7|A0A068WHM7_ECHGR	7.65133	NA	144811	LVSELLEAR;VFSLFR	1;1	2	2	0.0115	17155;3361	-	Phospholipase A(2) OS=Echinococcus granulosus OX=6210 GN=EgrG_000492900 PE=4 SV=1	2.62611e+06	45277.8
924_1	tr|A0A068WJJ7|A0A068WJJ7_ECHGR	2.3231	NA	12052.5	LLVVLR	1	1	1	0.0583	641	-	Expressed protein OS=Echinococcus granulosus OX=6210 GN=EgrG_000643000 PE=4 SV=1	300262	50043.6
163_1	tr|W6U8T7|W6U8T7_ECHGR	7.38905	NA	13540.4	EKFDPTCTK;KIDPTIK;WHNDCFVCTGCK	1;1;1	3	3	0.2353	23207;5679;47682	tr|A0A068WZT2|A0A068WZT2_ECHGR	Four and a half LIM domains-containing protein OS=Echinococcus granulosus OX=6210 GN=EGR_07403 PE=4 SV=1	1.08223e+06	135279
1478_1	tr|W6UNH6|W6UNH6_ECHGR	9.4783	NA	11951.3	HGFPYQPLCMGFDPVQR;SDHFQLGTIVK	1;1	2	2	0.2617	59466;30753	-	Syntaxin-binding protein 5-like protein OS=Echinococcus granulosus OX=6210 GN=EGR_01979 PE=4 SV=1	817074	102134
228_1	tr|A0A068WBJ0|A0A068WBJ0_ECHGR	34.2853	NA	22584.5	AIENLGHEPAMQK;FNEALK;GSFSIQTMLALMK;KMVLDTPTVK;KQIGLEEFLTK;MVLDTPTVK;QIGLEEFLTK;SELDDLFNNDNK	1;1;1;1;1;1;1;1	8	13	0.3266	41376;41373;1083;40851;23597;34422;34423;15886;26647;25497;40661;40710;40711	tr|W6UU16|W6UU16_ECHGR	Vacuolar protein sorting associated protein 37b OS=Echinococcus granulosus OX=6210 GN=EGR_03145 PE=3 SV=1	1.31922e+07	1.09935e+06
618_1	tr|W6UWL4|W6UWL4_ECHGR	15.9633	NA	45338.5	AVADFDCRPIQGVQSHLLK;FQEYPFNIR;IIELCEYGDR;KLVYVGEK;LVYVGEK	1;1;1;1;1	5	5	0.1139	61586;28895;32170;12305;5347	tr|A0A068W7S0|A0A068W7S0_ECHGR	Proliferation-associated protein 2G4 OS=Echinococcus granulosus OX=6210 GN=EGR_00300 PE=3 SV=1	6.87134e+06	274854
344_1	tr|U6JCH2|U6JCH2_ECHGR	18.6227	NA	39403.2	AQLPSLILACDVCLCAYTQTHR;FASTFYGPFR;LSEISLNYAK;SPVIGALK;TAIGSGDGTTDR	1;1;1;1;1	5	5	0.1703	67680;27549;23962;4163;24795	-	Delta-aminolevulinic acid dehydratase OS=Echinococcus granulosus OX=6210 GN=EGR_01040 PE=3 SV=1	5.91161e+06	328423
342_1	tr|A0A068X0J3|A0A068X0J3_ECHGR	29.6374	NA	109713	AVIGLSPFR;IPVDLR;KLVVVVDPHIK;RVIVTTASEPSQR;SEGFFVK;TIPLFYR;TLPLEVHR;VFWPSAPK;VYSGGQVVK;WYQAAAFHPFLR;YLDPIR	1;1;1;1;1;1;1;1;1;1;1	11	11	0.1007	13610;635;30914;41711;5592;10789;13881;12073;12343;44698;3776	tr|W6UHV3|W6UHV3_ECHGR	Neutral alpha glucosidase AB OS=Echinococcus granulosus OX=6210 GN=EgrG_000716600 PE=3 SV=1	3.9407e+06	77268.5
161_1	tr|W6U713|W6U713_ECHGR	2.76792	NA	68992.1	KAEFVDWCPTGFK	1	1	1	0.0211	47707	tr|A0A068WQJ6|A0A068WQJ6_ECHGR	Tubulin alpha-8 chain OS=Echinococcus granulosus OX=6210 GN=EGR_08207 PE=3 SV=1	2.19012e+07	811156
36_2	tr|U6JEE0|U6JEE0_ECHGR	43.1123	NA	29199.8	DNLTLWR;DSTLIMQLLR;IISAIESKDEGNER;IVDLNDESAPELTVEER;MQGDYNR;NLLSVAYK;QAFDDAIAELDTLNEESYK;QMANEILSLLEK;VATDIGTAELQPTHPIR;YDDMAQFMHK;YLAEIATASERDEVAK	1;0;1;1;1;0;1;1;1;1;1	9	14	0.5373	11259;27430;28396;28399;47004;56656;56690;56657;9325;10711;10758;61907;38906;38025;53846;53847;33189;33190;52428	-	14-3-3 protein epsilon OS=Echinococcus granulosus OX=6210 GN=EGR_01834 PE=3 SV=1	7.2974e+06	364870
36_3	tr|U6JGI4|U6JGI4_ECHGR	67.8326	NA	27759.8	AAFDAAITEVDSIK;AAFDAAITEVDSIKDETYK;ATSLAEAELSVTHPIR;DHASLVSIAK;DNLTLWNSECETDS;DSTLIMQLLR;ICNDVLALLSK;IMSSIAK;KQAGTPLADQTDIYLK;KVEEELTK;LAEQAER;MMGDYYR;NLLSVAYK;STEAAEEAYQK;TIAEMGNELNNEER;YEDMAVAMK;YLAEVQEGEQNDK;YLAEVQEGEQNDKSTEAAEEAYQK	1;1;1;1;1;0;1;1;1;1;1;0;0;1;1;1;1;1	15	22	0.7258	42009;60201;50585;50586;17716;50279;27430;28396;28399;30819;30898;30817;2459;52297;52299;14438;5806;12269;10711;10758;29607;48976;18663;45446;45491;69108;69119;69109	-	14-3-3 protein beta:alpha OS=Echinococcus granulosus OX=6210 GN=EGR_10354 PE=3 SV=1	9.13004e+07	4.15002e+06
36_1	tr|U6J5Z8|U6J5Z8_ECHGR	29.9204	NA	29393.4	AYEEATEIANEK;CLEQAER;DSTLIMQLLR;DSYVNTAK;ELNAICSDVLQLIEER;EYLDILQK;FDKELNNEER;LSCTHPIR;LYPSCSNAEGK;MMGDYYR;NLLSVAFK	1;1;0;1;1;1;1;1;1;0;1	9	14	0.4102	37782;10570;27430;28396;28399;10033;10085;55980;55975;16748;33657;33655;33721;14863;29561;29559;12269;9777	-	14-3-3 protein zeta OS=Echinococcus granulosus OX=6210 GN=EGR_03190 PE=3 SV=1	1.07568e+07	537839
36_4	tr|Q56J98|Q56J98_ECHGR	74.1126	NA	27927.8	AFDDAVAELDTLPEESYK;AMKDVLESGADLSVEER;DATLIMQLLR;DNLTLWNSDAGDTDAAEPPKAD;DVLESGADLSVEER;EILDLLDK;KAFDDAVAELDTLPEESYK;KQASDNSLMAYK;LCEQCER;NLLSVAYK;RACELAR;REENVYMAK;SATEVAEGDMQTTHPIR;TLLPAASSSESK;VISSIEQK;VISSIEQKHDGDAK;VREEIER;YDEMVK;YVAEFCTGDER	1;1;1;1;1;1;1;1;1;0;1;1;1;1;1;1;1;1;1	18	32	0.753	58624;58625;54640;54639;26342;27431;64308;64287;64285;64286;45263;13557;13556;61304;61302;37140;37139;15406;10711;10758;8949;24081;24083;54459;54458;54832;27464;27465;10422;10420;45653;12000;4117;36608	-	14-3-3 protein OS=Echinococcus granulosus OX=6210 GN=EGR_03128 PE=2 SV=1	1.76208e+08	8.81038e+06
1435_1	tr|A0A068WPV9|A0A068WPV9_ECHGR	5.25985	NA	47874.9	EASQSQISDTR	1	1	1	0.0255	29336	-	Vesicle associated membrane protein vamp OS=Echinococcus granulosus OX=6210 GN=EgrG_001122200 PE=4 SV=1	53405.8	2427.54
1178_1	tr|W6U7P9|W6U7P9_ECHGR	5.66304	NA	14022.2	LGHLGAYWPTSLR;RDILISLER	1;1	2	2	0.1774	43006;22475	tr|A0A068X1I3|A0A068X1I3_ECHGR	Uncharacterized protein OS=Echinococcus granulosus OX=6210 GN=EGR_08751 PE=4 SV=1	475551	79258.5
643_1	tr|W6V437|W6V437_ECHGR	2.57727	NA	60362.1	HVLSGSADGSVR	1	1	1	0.0222	27072	tr|A0A068WHR7|A0A068WHR7_ECHGR	WD40 repeat-containing protein SMU1 OS=Echinococcus granulosus OX=6210 GN=EGR_04288 PE=3 SV=1	0	0
770_1	tr|A0A068X015|A0A068X015_ECHGR	3.22038	NA	23191.8	FNSLILPHPVSFK	1	1	1	0.065	44345	tr|W6UIP6|W6UIP6_ECHGR	Eukaryotic translation initiation factor 4E type OS=Echinococcus granulosus OX=6210 GN=EgrG_000261200 PE=3 SV=1	96958.5	7458.34
1251_1	tr|A0A068WGK3|A0A068WGK3_ECHGR	29.3502	NA	16328.1	AWQCIVGK;AYFDSK;EAANVIAEALSIHYK;ENVFDEIAK;KENVFDEIAK;MDDHNIQLVVR;STDMSEAQQK	1;1;1;1;1;1;1	7	12	0.4138	13695;1482;48790;48791;48787;19136;27570;27564;36266;36263;37142;23113	tr|W6U531|W6U531_ECHGR	Dynein light chain OS=Echinococcus granulosus OX=6210 GN=EGR_09474 PE=3 SV=1	1.1437e+07	1.03973e+06
169_1	tr|A0A068W727|A0A068W727_ECHGR	20.4745	NA	82288.1	ATSEASTGQACVAR;EHDDAVLELSR;LSVEEVASHILAK;SALFLPAHK;VLNLQLTR	1;1;1;1;1	5	6	0.0738	39905;33089;39280;39278;14878;13462	-	DCC interacting protein 13 beta OS=Echinococcus granulosus OX=6210 GN=EgrG_000769900 PE=4 SV=1	1.22125e+06	45231.4
1246_1	tr|A0A068WER2|A0A068WER2_ECHGR	13.6937	NA	14672.8	FFAVVASTGLR;GPNSNFKPT;RFFAVVASTGLR	1;1;1	3	4	0.1556	25932;13688;35443;35444	-	40S ribosomal protein S30 OS=Echinococcus granulosus OX=6210 GN=EgrG_000855200 PE=3 SV=1	7.59901e+06	1.2665e+06
641_1	tr|W6URW1|W6URW1_ECHGR	11.9067	NA	28849.7	ASLLTNTER;LQCYGQELGR;QYGNLTSEITAK	1;1;1	3	3	0.1211	15937;29462;35476	tr|A0A068WP94|A0A068WP94_ECHGR	Vesicle transport through interaction with t-SNAREs 1A OS=Echinococcus granulosus OX=6210 GN=EGR_01086 PE=3 SV=1	629584	34976.9
922_1	tr|A0A068WHQ8|A0A068WHQ8_ECHGR	9.00087	NA	28919.1	IAEVGLDGR;ISQVWASSR;SAITIPGR	1;1;1	3	3	0.1024	11949;17359;5668	tr|W6UIA6|W6UIA6_ECHGR	Transcriptional activator protein Pur alpha OS=Echinococcus granulosus OX=6210 GN=EgrG_001079100 PE=3 SV=1	2.14755e+06	102264
167_1	tr|W6UKR4|W6UKR4_ECHGR	570.571	NA	306204	AFEDAIER;AGMSITEMEAR;AGSEPPPLSSTPTELQTYR;AITACAWDSQR;ALNNDIPGVIEEFLGSDISDPDTR;ALSDSGFGNQLSR;ASVCCGENLVK;AVQREDESTFTGLQVIRPK;CMLLYSVSADSTACLWK;CNTLSTDYLHDVEMIWR;CYFAQYGK;DAGLPLYLK;DGAYFEQWAGVR;DGLLAIYQVDK;DLISGLIFPALR;DSACLEGVPSDLR;DWITCLAIEQK;EALHALLVDLPMR;EDESTFTGLQVIRPK;EDSLSDLR;EELACAGHASVADCSAIHLVPSAESGALVSACTSDSQAGEVCLWR;EKNEVLR;ENGLILLNTYPASFAGR;FALICYAMSSLNPYNSPSVPANK;FDTLFEEHAK;FPHLTGQLLL…	1;1;1;1;1;1;1;1;1;1;1;1;1;1;1;1;1;1;1;1;1;1;1;1;1;1;1;1;1;1;1;1;1;1;1;1;1;1;1;1;1;1;1;1;1;1;1;1;1;1;1;1;1;1;1;1;1;1;1;1;1;1;1;1;1;1;1;1;1;1;1;1;1;1;1;1;1;1;1;1;1;1;1;1;1;1;1;1;1;1;1;1;1;1;1;1;1;1;1;1;1;1;1;1;1;1;1;1;1;1;1;1;1;1;1;1;1;1;1;1;1;1;1;1;1;1	126	219	0.5926	13100;27728;59096;59097;59098;32747;67661;67660;36920;36982;30253;30308;61962;61961;58432;61556;61557;17477;15187;39374;30171;34943;40360;38280;43360;43359;51267;12225;74381;9565;54309;54310;54328;67216;30258;30257;66713;66727;66725;66730;66729;66726;71526;20350;20196;30577;42175;42176;49512;49543;71667;71775;71774;71773;74123;64732;64734;22829;22824;9826;52712;52714;52792;52791;44165;44132;44130…	tr|A0A068WJ20|A0A068WJ20_ECHGR	Telomerase protein component OS=Echinococcus granulosus OX=6210 GN=EGR_02877 PE=4 SV=1	4.97835e+08	3.55597e+06
647_1	tr|A0A068WES7|A0A068WES7_ECHGR	11.6182	NA	10584.6	ESVAIVK;LVDSPKEPSAPTK;MESKPNEGVEDTELR	1;1;1	3	3	0.3646	2287;37872;51567	tr|W6UNF2|W6UNF2_ECHGR	Expressed conserved protein OS=Echinococcus granulosus OX=6210 GN=EgrG_000639100 PE=4 SV=1	6.02919e+06	753648
1472_1	tr|W6V661|W6V661_ECHGR	15.7795	NA	18730.7	ATPTGVQPVPGIFISR;SSASSSSAAAGAVEGHR;TGSKPLGFYIR	1;1;1	3	5	0.2472	49117;45847;45846;30424;30425	-	Partitioning defective protein OS=Echinococcus granulosus OX=6210 GN=EGR_03167 PE=4 SV=1	2.10882e+06	191710
1240_1	tr|A0A068WL97|A0A068WL97_ECHGR	54.2513	NA	69412.6	DSHILLGSAK;FDAPITCAAWIK;GPLVNSLNLLFNIK;GSNALLESENPDR;GYLYAYDIGPK;HQLSCALDELK;LGNTDEDVYYAIEGR;LLSTSTFEPTCYCDISR;MSGGITAITIDR;QGNCIVSISQR;SGSQDAINFSSCTDTTVEDEKPTLLK;SNEDDAVLK	1;1;1;1;1;1;1;1;1;1;1;1	12	12	0.2588	17715;39110;46350;39568;31710;34854;51140;59485;30164;31812;69983;15207	tr|W6U428|W6U428_ECHGR	Tbc tre 2:bub2:cdc16 domain family member OS=Echinococcus granulosus OX=6210 GN=EGR_09292 PE=4 SV=1	2.46179e+07	703369
1617_1	tr|W6UFE0|W6UFE0_ECHGR	47.7411	NA	34148.6	AASDAYNWVSSGER;AFVAGAISQLHNFTQELR;ELLGQTADR;GIQDQLASLSAVTSK;LQSALVNSEK;LSHYPLISDSLK;QAAEVAFPR;SIFQLSESAASAIR;VQAAQNTISNAYK;WLHGPSAETKPSTEK	1;1;1;1;1;1;1;1;1;1	10	15	0.4216	44972;58365;58364;15828;45294;20756;38100;38101;15120;43436;43434;43487;39871;49868;49867	-	Sj-Ts4 protein OS=Echinococcus granulosus OX=6210 GN=EGR_08263 PE=4 SV=1	8.9711e+07	4.07777e+06
920_1	tr|A0A068WC02|A0A068WC02_ECHGR	2.59159	NA	284205	VIAAAPLAVFR	1	1	1	0.0041	23367	tr|W6UIP1|W6UIP1_ECHGR	HEAT repeat containing protein 5B OS=Echinococcus granulosus OX=6210 GN=EgrG_000752900 PE=3 SV=1	134164	1208.68
1433_1	tr|W6UI96|W6UI96_ECHGR	9.53208	NA	65352.2	LLIILNK;VEVISADANK;VNDYLVEHR	1;1;1	3	3	0.0439	6343;17948;24424	-	Biotin--protein ligase OS=Echinococcus granulosus OX=6210 GN=EGR_07298 PE=4 SV=1	2.35e+06	67142.7
263_1	tr|W6UXS7|W6UXS7_ECHGR	8.83272	NA	83413.8	KSVLGLK;LENVAPAGPVSQNR	1;1	2	2	0.0275	2236;42077	tr|A0A068WR95|A0A068WR95_ECHGR	Uncharacterized protein OS=Echinococcus granulosus OX=6210 GN=EGR_01878 PE=4 SV=1	317624	8144.2
1305_1	tr|W6U0D6|W6U0D6_ECHGR	8.09571	NA	30651.1	NGSQSLIEIK;WTGTTLVAHDSPFCR	1;1	2	3	0.0912	20811;51925;51924	-	Uncharacterized protein OS=Echinococcus granulosus OX=6210 GN=EGR_10680 PE=4 SV=1	3.41697e+06	310633
225_1	tr|A0A068WX31|A0A068WX31_ECHGR	2.16622	NA	268205	HLLTQR	1	1	1	0.0026	3321	tr|W6V239|W6V239_ECHGR	Pre mRNA processing splicing factor 8 OS=Echinococcus granulosus OX=6210 GN=EgrG_000151700 PE=4 SV=1	34353.1	241.923
967_1	tr|A0A068WDP6|A0A068WDP6_ECHGR	19.4925	NA	114601	ALCTNHAELPR;EWDFLK;ILISDAYK;YASTIHSWLK;YLATSQLQPTDAR	1;1;1;1;1	5	6	0.048	32984;32983;6873;11605;28391;42682	tr|W6U0S7|W6U0S7_ECHGR	Aminopeptidase OS=Echinococcus granulosus OX=6210 GN=EgrG_001063900 PE=3 SV=1	1.90809e+06	34692.6
430_1	tr|W6UY90|W6UY90_ECHGR	46.81	NA	38048.2	ASCFCPPDR;FDPGDNAK;FYSDGFVTGK;GPNPTIATAFMDCDLQEYHK;HDCSPSASCIWDGITYSCECNR;ILVGNQEGVR;LPTACTK;LSMNLYENGK;SKPLLAYAACNQVTASILR;SLCLVSPSGK;TGEFCELEIVK	1;1;1;1;1;1;1;1;1;1;1	11	16	0.3965	22089;22088;8326;8376;22871;64176;68560;20478;20429;20481;4477;4478;26042;60001;18051;35469	tr|A0A068WPW1|A0A068WPW1_ECHGR	Crumbs protein OS=Echinococcus granulosus OX=6210 GN=EGR_06623 PE=4 SV=1	8.65262e+06	480701
432_1	tr|W6VAE7|W6VAE7_ECHGR	8.13184	NA	39267.4	VNAQSEAYEFMALYTELVAK;VNLGAFR	1;1	2	2	0.0767	63601;3779	tr|A0A068WBX0|A0A068WBX0_ECHGR	COP9 signalosome complex subunit OS=Echinococcus granulosus OX=6210 GN=EGR_01372 PE=3 SV=1	0	0
265_1	tr|U6JAP6|U6JAP6_ECHGR	8.37494	NA	35452.5	FTTLLR;LIAPCLCDGSLK;RCELCHFEYETR	1;1;1	3	3	0.0974	2518;36638;50716	-	E3 ubiquitin protein ligase MARCH8 OS=Echinococcus granulosus OX=6210 GN=EGR_06913 PE=4 SV=1	3.72211e+06	195900
1431_1	tr|A0A068WTY8|A0A068WTY8_ECHGR	24.4157	NA	109474	FDTACGLLTDFEK;GCYIASVVR;NRPDASVLLTHDFVSNPFLSIASTR;SILVLEWFNPR;TSQDLAGGTLTGR;VLISAATSTSAACAK	1;1;1;1;1;1	6	6	0.0871	45160;16878;69372;38153;32655;42011	-	Non-specific serine/threonine protein kinase OS=Echinococcus granulosus OX=6210 GN=EgrG_001102400 PE=3 SV=1	4.52076e+06	98277.3
227_1	tr|A0A068WQ79|A0A068WQ79_ECHGR	70.0924	NA	182700	AAVEYQR;ASLEESAASQTTR;EFSIAMFLIK;FVPPTLPDR;GHNDVIGDILIR;GLFPANHVQK;LDELTFAER;LLLLSGTLFK;LPTLLLAK;LTPIDGEQKEESEGR;LVQIFGK;NPFLSDIGK;QNTILEFIETER;RLVQIFGK;TAILDLAAQR;TNVILSTR;VTAAQAEVEAQK;YLNLFR	1;1;1;1;1;1;1;1;1;1;1;1;1;1;1;1;1;1	18	20	0.1024	6837;36851;27941;17762;35330;35326;22198;21083;21835;8581;50376;5165;15222;44030;13675;19618;10424;10423;30747;6273	tr|W6UH99|W6UH99_ECHGR	Intersectin 2 OS=Echinococcus granulosus OX=6210 GN=EgrG_000513400 PE=4 SV=1	5.9108e+06	71214.4
965_1	tr|W6UVN1|W6UVN1_ECHGR	8.02776	NA	59517.4	EGLLNAIER;HLEAAILHLIR	1;1	2	2	0.0379	16381;33245	tr|A0A068WFN9|A0A068WFN9_ECHGR	Rab5 GDP/GTP exchange factor OS=Echinococcus granulosus OX=6210 GN=EGR_00651 PE=4 SV=1	141891	4577.14
1437_1	tr|W6U6M2|W6U6M2_ECHGR	3.81102	NA	13444.1	TAAEVEFEK	1	1	1	0.0796	16825	-	Uncharacterized protein OS=Echinococcus granulosus OX=6210 GN=EGR_09150 PE=3 SV=1	526244	105249
776_1	tr|U6J0N8|U6J0N8_ECHGR	36.2086	NA	45722.3	ADILILGK;DHGLLAKPTR;GEGPYVWDVEGNK;GLLNAIVINEK;IALAALEILENEHLAER;LFGYDK;LVEALIDQAQQLTLVSR;YLDFLSAYTAVSQGHCHPK;YNVLWISDEVQTGLGR	1;1;1;1;1;1;1;1;1	9	9	0.284	7210;22028;41951;27036;56075;2068;55807;62251;54668	-	Ornithine--oxo-acid aminotransferase OS=Echinococcus granulosus OX=6210 GN=EGR_02924 PE=3 SV=1	1.86936e+06	77890
221_1	tr|A0A068WUF3|A0A068WUF3_ECHGR	13.7401	NA	58007.3	ADIDAILSSLLSR;SLGVHLSFIR;TGADNSLEAETQR	1;1;1	3	3	0.0667	38154;23424;39047	-	GTPase activating protein ZNF289 OS=Echinococcus granulosus OX=6210 GN=EgrG_000054800 PE=4 SV=1	532247	15654.3
963_1	tr|W6UNS9|W6UNS9_ECHGR	19.1564	NA	35383.9	DGVIVLSAISR;FIVDGQWK;FVSTVLYKPI;QNFYTIIDLPEGEHQYK;SSKPPLLPPQLLQVILNR	1;1;1;1;1	5	5	0.1951	23464;15324;25875;60330;58651	tr|H9M5Q1|H9M5Q1_ECHGR;tr|A0A068WKH4|A0A068WKH4_ECHGR	5'-AMP-activated protein kinase subunit beta-1 OS=Echinococcus granulosus OX=6210 GN=EGR_02359 PE=3 SV=1	2.37196e+06	237196
1686_1	tr|W6UE99|W6UE99_ECHGR	113.967	NA	44199	AAGLLLNK;ADSGKVEEFSK;ALESPTRPFLAILGGAK;AVMDAVVAATSK;DCVGPEVEAACK;DCVGPEVEAACKDPTPGTVFLLENLR;DVEKELEKPITFLK;EFADVISR;ELEKPITFLK;ELEYFAK;FHVEEEGK;GLDATGNK;IQLINNMLDK;IVAAVPTIK;KLSIMNVDVR;LSIMNVDVR;SLFDEAGAK;SLTALGDIYVNDAFGTAHR;TIIWNGPAGVFEWSNFANGTK;TVPQIMEK;VEEFSK;VGTATIESGIEDNLMGLDCGPTSSK;VHLPSDFITGDK;VHLPSDFITGDKFAEDAK;VSHVSTGGGASLELLEGK;YSLQQIVK	1;1;1;1;1;1;1;1;1;1;1;1;1;1;1;1;1;1;1;1;1;1;1;1;1;1	26	39	0.6602	4921;27797;51766;51765;25605;35985;70257;70256;50433;50431;50432;12330;29148;29149;10151;14362;3701;28164;10905;10904;26402;26403;18009;12372;58889;58890;58910;58909;58908;64205;12861;1866;67326;67325;35680;58027;51758;51759;14606	-	Phosphoglycerate kinase OS=Echinococcus granulosus OX=6210 GN=EGR_05752 PE=3 SV=1	6.60369e+07	2.06365e+06
32_1	tr|U6JBE2|U6JBE2_ECHGR	15.7795	NA	9183.77	FIDEINQFEFIAVK;ILVSVDSEYVDK;LLLERPQSVAEYQPLTR	1;1;1	3	4	0.5584	51101;37757;58650;58649	-	Expressed conserved protein OS=Echinococcus granulosus OX=6210 GN=EGR_10160 PE=4 SV=1	1.51422e+07	3.02845e+06
1260_1	tr|U6JJF9|U6JJF9_ECHGR	41.5065	NA	20333.9	AVDRDNSGCIDIHELQSAISQAGYR;DGSGTLSASELQK;DGYIQIGFEDFLVR;DNSGCIDIHELQSAISQAGYR;GVVYFDDFMHMCIILQK;KGVVYFDDFMHMCIILQK;LCQIFQK;LDKDGSGTLSASELQK;LSPAMYQLMMCR;LWDFVEGWQR	1;1;1;1;1;1;1;1;1;1	10	14	0.5862	69511;33613;49951;64550;64546;60822;63029;63028;12338;49370;49369;44398;36038;36042	-	Programmed cell death protein 6 OS=Echinococcus granulosus OX=6210 GN=EGR_04452 PE=4 SV=1	2.9975e+07	2.725e+06
223_1	tr|W6U899|W6U899_ECHGR	25.8986	NA	48738.9	EFSIYLTK;HLDHEYLPISGLSSFCK;ILIRPIISNPPLYGAR;NVAYVAQAIHAVTK;TLFLAQSFAK;VNLGVGAYR;WMVDLK	1;1;1;1;1;1;1	7	8	0.1848	15737;58375;53147;43668;43667;23240;13036;4516	tr|A0A068WSK6|A0A068WSK6_ECHGR	Aspartate aminotransferase OS=Echinococcus granulosus OX=6210 GN=EGR_07719 PE=3 SV=1	2.34503e+06	86852.9
961_1	tr|U6IVP2|U6IVP2_ECHGR	5.25985	NA	27974.7	NLDAVLDNYFK	1	1	1	0.0437	34750	-	Uridine/cytidine kinase OS=Echinococcus granulosus OX=6210 GN=EGR_03828 PE=3 SV=1	81838.6	5845.62
1309_1	tr|A0A068WEV7|A0A068WEV7_ECHGR	261.356	NA	249351	ACGPGLEETGNTVNSIAR;ADLCEIK;ADLEVIILTAGGAAIPCEIVK;AFGPGLSK;AGGPAELFVDLK;DHQDGSCSVYYK;EAGPVQVELR;EIDPVGEETVSAIIKDPDGR;EIPNSPFPVNVEGAPGDPR;EITGEVYSSSGR;ENQFFVDASK;ETGEHLVNVYK;FADEHIPFSPFR;FEIVHTGNNR;FFVNTANAGR;FGGVEIPMSPFHVR;FLEEDEGLK;FMDKPISGSPYVAK;FTVDTFAAGR;GIHTVSILNR;GISQTPGDVIK;GLLSVVVDGPSK;GPVQASLPSTFTVDATDAGLGDLK;GVHVPGSPFQLTVGQPVEGGPSK;GVSTDFTIDLTHVMPSLTQVAQK;HIPCDIVPIDDER;IAVGDETSVTVDTSR;IH…	1;1;1;1;1;1;1;1;1;1;1;1;1;1;1;1;1;1;1;1;1;1;1;1;1;1;1;1;1;1;1;1;1;1;1;1;1;1;1;1;1;1;1;1;1;1;1;1;1;1;1;1;1;1;1;1;1;1	58	77	0.3525	54586;54604;7506;61576;3775;29070;29068;42413;42412;21329;61284;61283;58096;33143;27066;33381;42604;42603;27278;27281;27205;27204;21249;21314;21312;47356;20106;46243;20415;22126;22460;26128;64881;64882;63561;66518;47557;46591;65866;12065;57677;66279;66278;52546;18015;22083;22082;14290;41829;9206;51161;48300;13175;35831;56155;23157;23156;29412;29413;66042;66040;30607;14422;49130;49169;21378;28930;…	-	Filamin OS=Echinococcus granulosus OX=6210 GN=EgrG_000859700 PE=3 SV=1	8.01694e+07	722247
34_1	tr|U6JFN5|U6JFN5_ECHGR	30.034	NA	37319.3	AVLALHDLINNK;DSSLGSLTQR;ISGLSGMLR;LQDMFNLLPDVR;TFDHLLSEIGAEEAEEVGVEHLLR;VTVHPLVLLGVVDHFNR;VVGVLLGALR	1;1;1;1;1;1;1	7	8	0.2831	35301;19089;12197;42528;68759;56339;56340;15564	-	26S proteasome non-ATPase regulatory subunit 7 OS=Echinococcus granulosus OX=6210 GN=EGR_04682 PE=3 SV=1	7.55699e+06	397737
774_1	tr|W6V9R5|W6V9R5_ECHGR	40.422	NA	25195.8	AQINSVIMELENQVAMAK;DIVSTQQNSK;EMEEMAQAEVDK;ILFELTNGAMGK;KLAEGIVASR;LGLMNEMVEESVESALDQPK;MASALNQSTSVMQAMSK;SGNIDAAK;TTMCNLSK	1;1;1;1;1;1;1;1;1	9	14	0.5157	58008;58006;58028;22877;22803;39953;33742;33750;17866;62659;62658;52910;3759;13323	tr|A0A068WNW0|A0A068WNW0_ECHGR	Charged multivesicular body protein 3 OS=Echinococcus granulosus OX=6210 GN=EGR_01905 PE=3 SV=1	3.33959e+07	2.783e+06
968_1	tr|A0A068WNJ0|A0A068WNJ0_ECHGR	21.8567	NA	51606.4	AHTDFFEAFK;ALYEQSLQIK;NYDESGSPR;SINSILDYVSTSK;TLLTYIK	1;1;1;1;1	5	6	0.1086	28834;28833;27577;16852;40853;7684	tr|W6UIR9|W6UIR9_ECHGR	COP9 signalosome complex subunit 2 OS=Echinococcus granulosus OX=6210 GN=EgrG_000119600 PE=3 SV=1	1.19783e+06	42779.5
1525_1	tr|W6UG94|W6UG94_ECHGR	3.57287	NA	12911.6	IEQYTEGK	1	1	1	0.0696	14013	tr|A0A068WWP5|A0A068WWP5_ECHGR	Uncharacterized protein OS=Echinococcus granulosus OX=6210 GN=EGR_05114 PE=4 SV=1	249802	49960.3
1547_2	tr|W6U266|W6U266_ECHGR	15.7795	NA	70786.5	AEFVIFMTSDK;ASGEIALQSEK;EPVWWGMR;FLLWLEQLPLPSTSGAGAGTSSK;GDSSLVDSIEEASLFAMSFKPGR;HGFYLQWTGTEMR;HGLTFSTTMEELEDHK;HGLTFSTTMEELEDHKNTLYQLEYVGGR;HLISGTVQFFTK;IDCAAWQPSPAEMLHLLPLINR;ISIACYSPFACAFLAPAAGAATR;KQIWTLYTEEK;LGIHPQIHLHSVHR;LLTSETFQGSLNVSGVSLK;LWAWNNK;LWQILPTGSAELAPEDCTK;MPCSPK;NPTAFLLQNHLGDFLSADHNGK;QIWTLYTEEK;REEFFSIETPSNQVR;RLWQILPTGSAELAPEDCTK;RPAFLAVSLQGGVK;SQVVMFQDVNGEYLTVGAR;SSLGAASTVD…	0;0;0;0;0;0;0;0;0;0;1;0;0;0;0;0;0;0;0;0;0;1;0;0;0;0;0;1	3	6	0.6049	33318;23636;18894;64890;64888;66000;65999;65998;48707;55216;55213;71982;71984;71983;38335;38334;67228;65228;65227;41410;49215;49216;49214;57851;57850;12062;12122;61085;61082;968;65588;65591;65589;65590;34685;54359;54377;54378;63784;41653;41654;60788;60787;60808;66335;66338;66337;57965;57966;61353;39673;48820;48821	-	Fascin-2 OS=Echinococcus granulosus OX=6210 GN=EGR_09978 PE=3 SV=1	8.45664e+06	264270
1301_1	tr|A0A068WR29|A0A068WR29_ECHGR	16.9263	NA	68391.2	DVKPENFLIGR;IIYMIDFGLAK;RDDLEALGHMFLYFLR;WIFTDLMK	1;1;1;1	4	4	0.0755	33353;33114;58207;18413	tr|W6UAW9|W6UAW9_ECHGR	Casein kinase I gamma OS=Echinococcus granulosus OX=6210 GN=EgrG_000345900 PE=4 SV=1	82056.3	3282.25
434_1	tr|U6JLR2|U6JLR2_ECHGR	5.25985	NA	16512.6	AQAGNDGIIDEILPFKER	1	1	1	0.1111	57957	-	Expressed protein OS=Echinococcus granulosus OX=6210 GN=EGR_03134 PE=4 SV=1	30815.2	5135.87
1138_1	tr|W6UXF9|W6UXF9_ECHGR	3.57287	NA	25073.8	MVITTHGVFR	1	1	1	0.0442	25499	tr|A0A068X0B0|A0A068X0B0_ECHGR	Marvel-containing potential lipid raft-associated protein OS=Echinococcus granulosus OX=6210 GN=EGR_06869 PE=4 SV=1	1.03591e+06	129488
261_1	tr|W6UE77|W6UE77_ECHGR	16.5017	NA	106307	KPFWFEK;LGEDSVER;LQLASNQAILR;VITNAWWVR;VLEEVLEK	1;1;1;1;1	5	5	0.0454	14759;10442;29645;24448;13555	tr|A0A068WXB6|A0A068WXB6_ECHGR	Serologically defined colon cancer antigen OS=Echinococcus granulosus OX=6210 GN=EGR_05909 PE=3 SV=1	2.25985e+06	38302.6
1303_1	tr|W6UGE3|W6UGE3_ECHGR	41.9801	NA	38848.9	AKPLQWGQPGNK;CTEANCDGVVKPDVVFFGEGLPSK;EYPFEFFK;FADLLEWK;FADLLEWKDDLLR;HYTQNVDQLER;ISGLPEDK;NAELDREFEEER;NIITAVGAGISTSAGIPDFR;NPKPFFEVAR;TDVFVK	1;1;1;1;1;1;1;1;1;1;1	11	14	0.3615	35438;68007;21928;16742;48944;39622;39623;8053;46086;57429;57431;28337;28336;483	-	NAD-dependent protein deacetylase OS=Echinococcus granulosus OX=6210 GN=EGR_05039 PE=3 SV=1	7.83297e+06	391649
1136_1	tr|W6UPG6|W6UPG6_ECHGR	12.8219	NA	95140.9	IQSANDLDEVIEAHK;KFLLLGQGDFIQR;LNEILETAIR	1;1;1	3	3	0.0451	50230;46021;26186	tr|A0A068WUW6|A0A068WUW6_ECHGR	Gamma-tubulin complex component OS=Echinococcus granulosus OX=6210 GN=EGR_05020 PE=3 SV=1	342038	6577.65
436_1	tr|A0A068WF53|A0A068WF53_ECHGR	3.06516	NA	50166	LFFTLPGK	1	1	1	0.0175	11608	tr|W6UVP3|W6UVP3_ECHGR	N acetylgalactosamine kinase OS=Echinococcus granulosus OX=6210 GN=EgrG_000657000 PE=3 SV=1	0	0
875_1	tr|W6UIK9|W6UIK9_ECHGR	5.25985	NA	35207.3	MWLTSHDFDR	1	1	1	0.0314	34505	tr|A0A068WTF1|A0A068WTF1_ECHGR	Aquaporin-4 OS=Echinococcus granulosus OX=6210 GN=EGR_04164 PE=3 SV=1	16160.8	2020.1
1708_1	tr|A0A068WL18|A0A068WL18_ECHGR	9.4783	NA	71123.9	LLTNSQQDAIWSTVR;YAIVIDAGSSGSR	1;1	2	2	0.0437	51526;33814	-	Ectonucleoside triphosphate diphosphohydrolase OS=Echinococcus granulosus OX=6210 GN=EgrG_000614100 PE=3 SV=1	68762.7	2455.81
877_1	tr|W6UR14|W6UR14_ECHGR	33.3218	NA	65901.5	ALKDTLAEFDK;AVIAYHQK;DTLAEFDK;EYVQVFGR;FEHLDIR;FVDEFSR;KFGGPGAR;REYVQVFGR;TLVVADPR;VNGRPLALLQPEPLLPK	1;1;1;1;1;1;1;1;1;1	10	11	0.1284	31194;31198;11954;12416;15581;11937;10147;4427;25031;8677;54781	tr|A0A068W8E8|A0A068W8E8_ECHGR	40S ribosomal protein S16 OS=Echinococcus granulosus OX=6210 GN=EGR_01281 PE=3 SV=1	8.16055e+06	204014
1005_1	tr|W6U9H4|W6U9H4_ECHGR	48.5386	NA	57564.1	AANVFVAK;AICSGVILDPPEDCTWR;DDELTVIDHFDQPWR;GSFGEVWLGR;IQSVEVAVK;LLIPGTETGTFLIRPSR;MYELMR;TLCEGVVK;TLEPTNILNK;TNDSKDLYIDK;TSGPITSQPCSR;YLQTEEGR;YTVEEAIR	1;1;1;1;1;1;1;1;1;1;1;1;1	13	14	0.2747	5988;57999;55494;55493;22012;14283;55135;7114;10592;24306;34746;33510;15466;14699	-	Tyrosine-protein kinase OS=Echinococcus granulosus OX=6210 GN=EGR_10002 PE=3 SV=1	3.26775e+07	1.02117e+06
514_1	tr|A0A068WEN7|A0A068WEN7_ECHGR	7.61567	NA	25028.7	AAFGSGVYEGMK;FQEILTSNR	1;1	2	2	0.0938	29043;22021	tr|W6UCC4|W6UCC4_ECHGR	Expressed conserved protein OS=Echinococcus granulosus OX=6210 GN=EgrG_000596300 PE=4 SV=1	3.48282e+06	316620
115_1	tr|W6U6P9|W6U6P9_ECHGR	2.36454	NA	236129	NIQPLK	1	1	1	0.0029	632	tr|A0A068WNK8|A0A068WNK8_ECHGR	Uncharacterized protein OS=Echinococcus granulosus OX=6210 GN=EGR_08219 PE=4 SV=1	3.29305e+06	25137.8
1040_1	tr|A0A068W745|A0A068W745_ECHGR	2.55026	NA	96421.3	QSGQYILAEQALR	1	1	1	0.015	43354	tr|W6VE36|W6VE36_ECHGR	Tetratricopeptide repeat protein 7B OS=Echinococcus granulosus OX=6210 GN=EgrG_000775000 PE=4 SV=1	0	0
512_1	tr|A0A068W7D4|A0A068W7D4_ECHGR	59.1567	NA	80175.2	APLHTAVCHR;ASSELINLLR;FGYTPLTHAIR;GANPNPVDR;KLTVIDSLCR;KPVIVTGSQIPIGELR;LAYVLGCFK;MLTYDLR;MVGMSLQELDLEGR;NLPEIVSLLK;NQIHVNYYK;NVVSGQAGITQIVGHVGSILSR;QYGATLSPVEVTR;SDLLDIFK;TSYGTTAHEEALQR	1;1;1;1;1;1;1;1;1;1;1;1;1;1;1	15	16	0.2386	25541;22534;32627;12520;28346;50961;19520;10860;47560;23255;26690;62204;40529;13135;47092;47091	tr|W6UU87|W6UU87_ECHGR	Asparaginase OS=Echinococcus granulosus OX=6210 GN=EgrG_000796600 PE=4 SV=1	7.67241e+06	191810
1003_1	tr|A0A068X2Y9|A0A068X2Y9_ECHGR	35.6482	NA	118431	ALASLLGLSTVPTR;ASLLADLSTGR;FLWEAYR;HYFSLIK;ICLDLVR;KAPSVEELSALGSK;KEQLEQIQEER;TAELFLR;TLLQLSQVYR;VVEDIWGLVLLSK	1;1;1;1;1;1;1;1;1;1	10	10	0.0994	39433;21719;14911;10703;9614;40240;41013;7588;29320;43017	tr|W6UYX1|W6UYX1_ECHGR	Eukaryotic translation initiation factor 3 OS=Echinococcus granulosus OX=6210 GN=EGR_06323 PE=4 SV=1	1.01186e+07	151024
1477_1	tr|U6JAB5|U6JAB5_ECHGR	26.4504	NA	17552	DAGLKDAVSALILR;DAVSALILR;GFQKPVDITYPALLVWHEK;KLDVDSFSQSNFEEETVDDTHLNPR;MVLDNAPVNSK;YEEALR	1;1;1;1;1;1	6	9	0.4839	41616;41614;13507;62989;62987;70490;70488;27352;3940	-	Actin-related protein 2/3 complex subunit 5 OS=Echinococcus granulosus OX=6210 GN=EGR_07233 PE=3 SV=1	6.36476e+06	578615
113_1	tr|W6UP73|W6UP73_ECHGR	5.25985	NA	32842.7	AEIGASLVLLAPPR;IASYQVGNELAHSTSVVTPTSPS;IQTHIFEEGNVQLLSSK;LDLFTHSVADVSSLRPDDCGGGSIK;NPSIVIYVESSFQQSFR;QTNEVVKDVK;SFKFEVVAK;SPEILGR;SQWTLTIPDEIEGAVCQGSGEIR;VLAGQNSLIEGK	0;1;0;0;0;0;0;0;0;0	1	1	0.5233	39836;39835;64697;57008;57009;68238;68241;58333;58334;25440;18505;18508;3465;67240;67239;29798;29743;29795	-	F-actin-capping protein subunit alpha OS=Echinococcus granulosus OX=6210 GN=EGR_02698 PE=3 SV=1	1.24095e+06	88639.4
113_2	tr|A0A068WAP8|A0A068WAP8_ECHGR	10.5197	NA	35028.1	AEIGASLVLLAPPR;IQTHIFEEGNVQLLSSK;ITECDSDYQQAIGSNLTEMSSK;KITECDSDYQQAIGSNLTEMSSK;LDLFTHSVADVSSLRPDDCGGGSIK;NPSIVIYVESSFQQSFR;QTNEVVKDVK;SFKFEVVAK;SPEILGR;SQWTLTIPDEIEGAVCQGSGEIR;VLAGQNSLIEGK	0;0;1;1;0;0;0;0;0;0;0	2	3	0.4922	39836;39835;57008;57009;66400;66411;67810;68238;68241;58333;58334;25440;18505;18508;3465;67240;67239;29798;29743;29795	-	F-actin-capping protein subunit alpha OS=Echinococcus granulosus OX=6210 GN=EgrG_000989000 PE=3 SV=1	428334	32948.8
588_1	tr|A0A068WBM7|A0A068WBM7_ECHGR	3.57287	NA	25146.5	LLLDWIQGK	1	1	1	0.0381	20494	tr|W6U7P4|W6U7P4_ECHGR	NADP binding domain OS=Echinococcus granulosus OX=6210 GN=EgrG_000819200 PE=4 SV=1	26204.9	2382.27
266_1	tr|A0A068WM23|A0A068WM23_ECHGR	8.12301	NA	32157.2	SEFQDILIFK;VLIIGGGDGGVAR	1;1	2	2	0.0796	30483;27033	tr|W6UQR9|W6UQR9_ECHGR	Spermidine synthase OS=Echinococcus granulosus OX=6210 GN=EgrG_000485300 PE=3 SV=1	314636	18508
1001_1	tr|U6J9R0|U6J9R0_ECHGR	38.8346	NA	35790.7	AGTVAPCDVTVPALNTGLGPEK;CFVVCADNVR;EYLADPSK;FASTVTNAPVASAEANADDKGAAPTETK;GSAEIVFGK;GTIEILSDVPLIK;ILHNYDR;INPFDYGLQIR;VGQSEAVLLK	1;1;1;1;1;1;1;1;1	9	11	0.3653	61815;61826;61827;30443;11550;69156;10690;39357;11991;36059;17861	-	60S acidic ribosomal protein P0 OS=Echinococcus granulosus OX=6210 GN=EGR_02751 PE=3 SV=1	6.97578e+06	279031
1475_1	tr|W6UKN9|W6UKN9_ECHGR	8.20823	NA	136987	ADQFVTGSVDK;YSVPSHPISIPR	1;1	2	2	0.0184	25827;37014	-	Ribosome biogenesis protein WDR12 OS=Echinococcus granulosus OX=6210 GN=EGR_06438 PE=4 SV=1	0	0
510_1	tr|W6V280|W6V280_ECHGR	5.25985	NA	36795.8	ESIGGLITDPWVLDDR	1	1	1	0.0475	52944	tr|A0A068WSH9|A0A068WSH9_ECHGR	Solute carrier family 10 member OS=Echinococcus granulosus OX=6210 GN=EGR_05140 PE=3 SV=1	710472	59206
879_1	tr|A0A068WEW2|A0A068WEW2_ECHGR	20.8772	NA	50997	AGHQTSAESWGTGR;AWSDIQK;FTIWTEGAFR;LNPNAISER;VDKIPELPLVVSGDVEK;YLNILK	1;1;1;1;1;1	6	7	0.1388	41732;41731;7456;29673;16329;54319;3146	tr|W6UY64|W6UY64_ECHGR	Ribosomal protein l4 OS=Echinococcus granulosus OX=6210 GN=EGR_01624 PE=3 SV=1	1.24334e+08	4.44051e+06
268_1	tr|U6JDJ7|U6JDJ7_ECHGR	22.7515	NA	14628.5	AVKGEEVVYR;EDVEDLKEK;GAEVVVLTR;GEEVVYR;GGTSHWGGITR;MSWGSISLEK	1;1;1;1;1;1	6	8	0.3712	24769;24766;21786;12742;7664;23383;23382;23933	tr|W6U1R1|W6U1R1_ECHGR	Uncharacterized protein OS=Echinococcus granulosus OX=6210 GN=EGR_10686 PE=4 SV=1	8.2412e+06	686766
516_1	tr|A0A068WEV4|A0A068WEV4_ECHGR	53.9518	NA	106785	AIENHVINVGFAPVPLSAVNTEK;CALQNSFLAK;ESFQAEVK;FYILSR;IPSPFFDLAWR;LDESSPNTCVNK;LLTSLYNTGVDIIK;SIVSDVDR;SYSAVDSIQAAYDALMKDDK;TFIVIK;TGASLLTFGLSTTYAPK;VNYEVVLFTPKPDEPYYVEMLK;VVWGGIGGLFR	1;1;1;1;1;1;1;1;1;1;1;1;1	13	13	0.175	65684;24887;12371;4860;36755;37575;46607;9703;62177;1050;51434;68549;25503	-	Ribosomal protein S1 RNA binding domain OS=Echinococcus granulosus OX=6210 GN=EgrG_000967800 PE=4 SV=1	2.22809e+07	464185
1007_1	tr|W6V4F6|W6V4F6_ECHGR	2.01959	NA	62421.9	QELSHALYQHDAACR	1	1	1	0.0263	52822	tr|A0A068WNG0|A0A068WNG0_ECHGR	Pre-mRNA-processing factor 19 OS=Echinococcus granulosus OX=6210 GN=EGR_04047 PE=3 SV=1	475570	18291.1
1473_1	tr|U6JEN8|U6JEN8_ECHGR	20.9808	NA	23585.9	APIMLFMK;DKHDDQESLNAR;KNEVSSVPVVLFFK;MLEILHK;SEEEVDSFLK	1;1;1;1;1	5	6	0.2429	13136;40876;47931;47932;9350;26911	-	Glutaredoxin 3 OS=Echinococcus granulosus OX=6210 GN=EGR_04216 PE=4 SV=1	1.80701e+06	150584
872_1	tr|W6U9J4|W6U9J4_ECHGR	15.7795	NA	46979	EGGMPLDVLQR;LAFGSIALNK;QIMFEDSAFLQK	1;1;1	3	3	0.0789	28952;17381;42314	-	Rhomboid-related protein OS=Echinococcus granulosus OX=6210 GN=EGR_09968 PE=4 SV=1	2.45616e+06	153510
1046_1	tr|U6JGN1|U6JGN1_ECHGR	61.7741	NA	47702.7	ALTFLNDFLASK;AQLAAAYSGVPLELVEYCPGISSLPDEAK;DGVTLFDANAIAYFLGNK;GTGLIFDLSPDLQTDYESYTWTK;IADFFALGDVCDGK;LDPDCPDTK;LLDEAGR;LLDEAGREPYPHLVR;LYTPPDYHK;SCPAEAAPVFHAR;SNPLVQLPAGTFNYNDFK;TFDPTTDSIWYCEYNYPEELK;TVAETCVFK;TYFVGEHITQADLTVFSALR	1;1;1;1;1;1;1;1;1;1;1;1;1;1	14	22	0.5	36273;71063;56675;68297;45675;18887;3579;52410;52409;52408;23697;23693;23692;40089;40091;58982;58980;68519;68521;18477;63464;63463	-	Elongation factor 1-gamma OS=Echinococcus granulosus OX=6210 GN=EGR_04125 PE=3 SV=1	1.07366e+07	488027
625_1	tr|W6UDJ4|W6UDJ4_ECHGR	5.27839	NA	177627	KRPTTTELLK;LVDFGVSAQLDR	1;1	2	2	0.0136	27244;35223	tr|A0A068WVK0|A0A068WVK0_ECHGR	Serine/threonine-protein kinase mig-15 OS=Echinococcus granulosus OX=6210 GN=EGR_08767 PE=4 SV=1	681960	9742.28
332_1	tr|A0A068WTD4|A0A068WTD4_ECHGR	2.04669	NA	25324.7	SITDAEAIQK	1	1	1	0.0442	19880	-	Ras C3 botulinum toxin substrate 1 OS=Echinococcus granulosus OX=6210 GN=EgrG_000522200 PE=4 SV=1	173212	11547.5
1226_1	tr|W6USV8|W6USV8_ECHGR	23.9597	NA	20394.7	DLMTTMGDR;EAFSLIDGSK;NGDFNYR;NPSEEYLDEMLK;VDELFHGAPIK;WTDEKVDELFHGAPIK	1;1;1;1;1;1	6	6	0.3051	17629;19274;9469;42862;29583;55466	tr|A0A068X1P7|A0A068X1P7_ECHGR	Myosin regulatory light chain sqh OS=Echinococcus granulosus OX=6210 GN=EGR_00670 PE=4 SV=1	2.14128e+06	214128
836_1	tr|W6UUL5|W6UUL5_ECHGR	2.23902	NA	45857.5	LSPSWK	1	1	1	0.0151	896	-	Uncharacterized protein OS=Echinococcus granulosus OX=6210 GN=EGR_08032 PE=4 SV=1	2.95872e+06	113797
683_1	tr|W6USW1|W6USW1_ECHGR	114.295	NA	46464.8	AANENSLEK;AANENSLEKDVVGDTSGYFK;ALLTTLLANTNTPMAFAEHFNDGLSGAGTNDDQLMR;AMDGMGTDEAMIIEILGTR;AQLCYDAINGAGTDELALIEVICTSTNSEIEELKK;DDTSGDYEK;DLVDDIKDDTSGDYEK;DVVGDTSGYFK;GIDSIIDK;GIDSIIDKK;GSYGEDLR;GSYGEDLREK;HEPTEQQLK;HEPTEQQLKDIANR;ILVALLAAQR;LGTDEEAFITILCTR;LVEAIASETK;LYDAGEK;NCYLTR;RLGTDEEAFITILCTR;SPWQLIAISK;VCQNHGK;VEIAEAYK;VEIAEAYKGSYGEDLR;VTNCGLPCNPTLRPYPNFNANSDVELLK;VTNCGLPCNPTLRPYPNFNANSDVELLKK	1;1;1;1;1;1;1;1;1;1;1;1;1;1;1;1;1;1;1;1;1;1;1;1;1;1	26	75	0.6268	14419;14470;14469;14471;14516;61392;61390;61389;61398;61391;61393;61394;61395;73573;73578;73574;73576;73579;73577;73604;73603;58962;58963;59264;73682;73684;73681;73683;17117;54072;54071;27271;8186;15144;15143;9985;9984;25009;22101;22102;22104;22100;50169;19354;19356;19353;19355;51709;51708;18940;18938;18941;4694;4698;6300;55754;55753;24312;24311;7120;11591;53326;71743;71737;71733;71724;71730;7173…	tr|A0A068WUR8|A0A068WUR8_ECHGR	Annexin OS=Echinococcus granulosus OX=6210 GN=EGR_00675 PE=3 SV=1	4.2919e+08	1.71676e+07
982_1	tr|U6JDY8|U6JDY8_ECHGR	8.41132	NA	9302.87	IHALTLTTLTPK;ISVLNPLHLGITDFSDGCGLK	1;1	2	2	0.4024	34606;63214	-	BolA-like protein OS=Echinococcus granulosus OX=6210 GN=EGR_08566 PE=3 SV=1	1.92988e+07	3.85976e+06
1572_1	tr|W6UUL9|W6UUL9_ECHGR	7.23589	NA	22344.6	KTLSQADLK;TYDVCSICLEK;YYCHVCQR	1;1;1	3	3	0.1379	15902;38826;27119	tr|A0A068WCT8|A0A068WCT8_ECHGR	RING-type E3 ubiquitin transferase OS=Echinococcus granulosus OX=6210 GN=EGR_00237 PE=4 SV=1	113273	14159.1
1570_1	tr|W6UIV3|W6UIV3_ECHGR	7.41604	NA	48466.1	FNDQPIDPIVVK;TLQPSQPELEEFFESVHER	1;1	2	2	0.0723	38687;64076	-	Epidermal growth factor receptor kinase OS=Echinococcus granulosus OX=6210 GN=EGR_04189 PE=4 SV=1	487934	23235
681_1	tr|A0A068WMY2|A0A068WMY2_ECHGR	20.9904	NA	57009.9	HEVGTQILR;ISELGSGNWGVVSR;QLDDQQLDDSQR;TCFSDDFIDLVASCLR;TESVERPSLEVLQHHAFVATVAGLVPAGANR	1;1;1;1;1	5	7	0.1577	18369;42523;42515;56411;56413;71933;71932	tr|W6U8Y3|W6U8Y3_ECHGR	Dual specificity mitogen activated protein OS=Echinococcus granulosus OX=6210 GN=EgrG_000514400 PE=4 SV=1	1.4189e+06	59120.9
1044_1	tr|W6UIX6|W6UIX6_ECHGR	23.8945	NA	29215.3	GGGGCLIQEK;GLPIEVIPIAATPIKLEIEK;IQCIPTSYQALQLIK;LPLTSLTDHPLLDVAFDGVDEITR;YLGEHWAR	1;1;1;1;1	5	5	0.2873	16569;61385;52682;68151;17232	-	Ribose-5-phosphate isomerase OS=Echinococcus granulosus OX=6210 GN=EGR_07012 PE=3 SV=1	1.00628e+06	71876.9
838_1	tr|U6JFG3|U6JFG3_ECHGR	127.784	NA	63365.9	EFMPEALK;EFMPEALKEK;ELVSCSNCTDYQSR;EVEYVHMLNATMCATTR;EVMQEVAQLSQFDEELYK;GDVADSVAK;GEWVSPADLPLR;GPLVFLEQAIINLALR;IPFVHTAPIDQQK;KEVMQEVAQLSQFDEELYK;KYVPLYTPFFMR;LPQNEVK;MSLEDKAESK;NDLVYEIGNILHPEVPISDDEENNK;QYSHVDLVQMVDGYDGDR;SNDAEEEVK;STKPAAQATTDGSCVPSVATPPSSAAPTNVR;TDKGGDPDLLR;TFGDASVVK;TLTICIDETIK;TLTICIDETIKK;VICAILENYQTTDGIVVPEAIR;VLSLDLFR;VVSIVSGELNNAAAMK;YAGISTCFR;YDLEGWYPGSK;YKNPEAVDK;YLIATS…	1;1;1;1;1;1;1;1;1;1;1;1;1;1;1;1;1;1;1;1;1;1;1;1;1;1;1;1	28	43	0.6099	13861;29350;51218;51253;58997;59022;62088;62087;8249;36268;52450;44080;44082;44079;64251;47043;6380;23927;23924;70132;60359;60062;60360;16675;16719;70979;27206;27207;11634;34476;41262;41260;66374;66373;13779;48181;48209;19778;34882;19095;19091;51558;51557	-	Seryl-tRNA synthetase OS=Echinococcus granulosus OX=6210 GN=EGR_08439 PE=3 SV=1	1.22639e+08	3.71634e+06
984_1	tr|W6UC62|W6UC62_ECHGR	3.81102	NA	52242.2	LSYYVPFPQELR	1	1	1	0.026	44950	tr|A0A068X0Q9|A0A068X0Q9_ECHGR	Ubiquitin carboxyl-terminal hydrolase OS=Echinococcus granulosus OX=6210 GN=EGR_06950 PE=3 SV=1	0	0
986_1	tr|A0A068WMC8|A0A068WMC8_ECHGR	30.2662	NA	15860	CTFDDFK;CTFDDFKAELESLEK;IEEQKEIIVDK;RCTFDDFK;SDLLLVSWIPDTASVR;SFVQVNEK;YAVLDFEPDNNK	1;1;1;1;1;1;1	7	10	0.4599	12106;54161;36482;36481;20697;52571;52570;13123;40727;40782	tr|W6UJD3|W6UJD3_ECHGR	Actin depolymerizing factor OS=Echinococcus granulosus OX=6210 GN=EgrG_000528900 PE=3 SV=1	3.36237e+07	3.0567e+06
1042_1	tr|A0A068WDX8|A0A068WDX8_ECHGR	39.9851	NA	36244.2	GSVQEFLDFTAK;LCAVVFSDQEYPQR;LFSLQVLYK;LFYQTAK;LGEYLVK;LLQGTYDLSSFSFFQR;LQADVEDTTQILHQTLETLIER;QDKLCAVVFSDQEYPQR;VAQTLLTK	1;1;1;1;1;1;1;1;1	9	10	0.3082	36356;36353;51060;22205;8661;6076;56184;67476;60133;8868	-	Synaptobrevin YKT6 OS=Echinococcus granulosus OX=6210 GN=EgrG_000826400 PE=3 SV=1	3.489e+07	1.51695e+06
1224_1	tr|A0A068WSJ6|A0A068WSJ6_ECHGR	2.59159	NA	60093.6	LLGELAPTR	1	1	1	0.0165	14123	tr|W6UPT4|W6UPT4_ECHGR	Pyruvate dehydrogenase OS=Echinococcus granulosus OX=6210 GN=EgrG_000185500 PE=4 SV=1	0	0
627_1	tr|A0A068WMT5|A0A068WMT5_ECHGR	22.1635	NA	61267.4	AANILLSDKGEVK;DFVQCCLVQRPENR;LADFGVAGQLTK;THIRPLLLDIQR;TLRPVAIK;TVYLQELIEAYR	1;1;1;1;1;1	6	6	0.1272	37265;53891;29269;43203;10071;44279	-	Serine threonine protein kinase OS=Echinococcus granulosus OX=6210 GN=EgrG_000423200 PE=4 SV=1	1.01243e+06	29777.3
330_1	tr|W6U687|W6U687_ECHGR	20.9472	NA	16015.1	ALKPLPHPK;ELEVLLMQHR;HIHPDGFK;HVLINNVK;IVNPNAK	1;1;1;1;1	5	8	0.3134	15761;32195;32193;13116;12395;12359;12396;2699	-	60S ribosomal protein L32 OS=Echinococcus granulosus OX=6210 GN=EGR_08481 PE=3 SV=1	1.1881e+07	1.69729e+06
117_1	tr|A0A068W7V8|A0A068W7V8_ECHGR	5.5961	NA	364296	LNLSQK;TLDAISDILGK	1;1	2	2	0.0052	210;24510	tr|W6UWH5|W6UWH5_ECHGR	Non-specific serine/threonine protein kinase OS=Echinococcus granulosus OX=6210 GN=EgrG_000787900 PE=3 SV=1	631615	3568.44
629_1	tr|W6V1M1|W6V1M1_ECHGR	8.83272	NA	28837.6	IWHPNIDEEGR;LLAQELTDLK	1;1	2	2	0.083	37687;24386	tr|A0A068WB40|A0A068WB40_ECHGR	NEDD8-conjugating enzyme UBE2F OS=Echinococcus granulosus OX=6210 GN=EGR_00111 PE=3 SV=1	605329	43237.8
1170_1	tr|A0A068WSU3|A0A068WSU3_ECHGR	29.8721	NA	21450.6	IDCEEGLLDTAIEAAR;LKIDCEEGLLDTAIEAAR;QLQVECDTYK;QLQVECDTYKLR;TAIDAATEAISR;YGQAWCCVVGR	1;1;1;1;1;1	6	12	0.2789	52669;52671;52672;58753;58752;33084;32090;46713;46712;29198;29196;37123	-	Dynein light chain OS=Echinococcus granulosus OX=6210 GN=EgrG_000684700 PE=4 SV=1	9.1389e+07	9.1389e+06
830_1	tr|U6JCI6|U6JCI6_ECHGR	10.6624	NA	13455.4	AMSIMNSFVNDIFER;EIQTAVR;QVHPDTGISSK	1;1;1	3	5	0.2705	52667;5829;25985;25987;24870	tr|W6U140|W6U140_ECHGR	Histone H2B OS=Echinococcus granulosus OX=6210 GN=EGR_01053 PE=3 SV=1	2.039e+07	2.26555e+06
26_1	tr|W6UW77|W6UW77_ECHGR	16.7797	NA	84623.4	FGDIGAYGVDLLR;LFIAPLYSK;LKDALTEFSTLQK;TPSAVAVR	1;1;1;1	4	4	0.057	39270;18317;44086;4949	-	Uncharacterized protein OS=Echinococcus granulosus OX=6210 GN=EGR_07389 PE=4 SV=1	1.36175e+06	31668.7
832_1	tr|A0A068WB11|A0A068WB11_ECHGR	46.287	NA	81850.6	FKPPPPNTDIGWR;GFKPLEHDR;GYLLDTDCR;ITNDVVAECLAVSR;LGVEQFIR;LNFLIPISR;RASGELPTTAR;RGDLIFYGK;SLFYPEEAINDSIPR;STGAALYFGDEIEYTLIHIDPK;TEILLHGMTSSR;VLLIASELVPYMR;WDIISASVDDRTEEER	1;1;1;1;1;1;1;1;1;1;1;1;1	13	15	0.2213	45582;21379;21377;22276;46492;13724;19698;25345;19400;52024;66099;36514;36517;44569;56471	tr|W6VD41|W6VD41_ECHGR	Glutamate--cysteine ligase OS=Echinococcus granulosus OX=6210 GN=EGR_00133 PE=3 SV=1	4.57218e+07	1.4749e+06
1578_1	tr|U6J5T1|U6J5T1_ECHGR	42.6521	NA	17302.5	AGELTEDEIEK;DIEDGKHTQLLAQGLDSK;HTQLLAQGLDSK;IAYALTAIK;IPDWFLNR;IVTVMANPR;KIAYALTAIK;QKDIEDGK;RAGELTEDEIEK;VMNTNIDGQR	1;1;1;1;1;1;1;1;1;1	10	12	0.4631	30061;57615;34698;34696;13835;18914;15747;20975;20974;11110;38946;24601	-	40S ribosomal protein S18 OS=Echinococcus granulosus OX=6210 GN=EGR_02621 PE=3 SV=1	6.22288e+07	5.18574e+06
689_1	tr|U6J6U1|U6J6U1_ECHGR	77.8563	NA	23420.8	DTFLHLTSWLEDAK;DVQKEEGEAFAR;EEGEAFAR;EHGLIFLETSAK;FQPVHDLTIGVEFGAR;GAAGALLVYDITR;IGPHNYPSGASASASNPPK;IQEGILDLNNEANGIK;KIQEGILDLNNEANGIK;LQIWDTAGQETFR;QHSSSNMVIMLIGNK;RDTFLHLTSWLEDAK;SCLLLQFTDK;SCLLLQFTDKR;TAANVEEAFIETAK	1;1;1;1;1;1;1;1;1;1;1;1;1;1;1	15	33	0.7406	50058;38364;38362;10726;36520;36521;52946;52947;35231;35230;54713;51783;51784;51800;51782;51788;55111;55112;55113;47135;47138;47125;49172;49605;49632;49639;54176;54177;54178;29527;38465;38463;44068	-	Ras protein Rab 2A OS=Echinococcus granulosus OX=6210 GN=EGR_02294 PE=4 SV=1	2.96845e+07	1.85528e+06
349_1	tr|U6J582|U6J582_ECHGR	20.5876	NA	14962.1	DTEHWTR;GYIGEFEIVDDHR;HLGGVILGYFF;IVVQLNGR;VNVLADALK	1;1;1;1;1	5	6	0.3692	12764;46588;46585;29424;10183;12671	-	40S ribosomal protein S15a OS=Echinococcus granulosus OX=6210 GN=EGR_02076 PE=3 SV=1	4.63862e+06	463862
24_1	tr|W6UF42|W6UF42_ECHGR	2.51047	NA	19746.7	HDKPADCDKK	1	1	1	0.0549	28886	tr|A0A068WVE7|A0A068WVE7_ECHGR	Uncharacterized protein OS=Echinococcus granulosus OX=6210 GN=EGR_05636 PE=4 SV=1	254403	21200.3
621_1	tr|A0A068WMZ9|A0A068WMZ9_ECHGR	5.74772	NA	61043.9	IGDFGLLR;NVLQVTQLQHFDFVR	1;1	2	2	0.0423	9729;54510	tr|A0A068WTZ7|A0A068WTZ7_ECHGR;tr|W6UAY6|W6UAY6_ECHGR	Non-specific protein-tyrosine kinase OS=Echinococcus granulosus OX=6210 GN=EgrG_000557500 PE=4 SV=1	18509.7	616.99
1222_1	tr|A0A068WJY5|A0A068WJY5_ECHGR	171.196	NA	78825.6	AGTLSIHR;ASGGSDKENASSANVLVVR;DDVCIFISQSGETADTLLALR;DIEFFLSSDASAVVEHTDR;DIVTLHLEIK;EIFEQPDSILNTMR;ELDGSFALACK;ELTYIHAEGIVSGELK;ETDCGIHMNAGPEIGVASTK;GFVFETETDTEVIPK;GLDVDCPR;GSPLLLGIK;GSYDYFMQK;GYDSAGIAIDEDCVK;GYHYATCLEGALK;HDDPIFETHVGIAHTR;HGPLAMIDAEMR;IAEDMVNAR;IIMVVTK;KEIIEALSR;KGFVFETETDTEVIPK;KQISEVLINGLR;LKELTYIHAEGIVSGELK;LMFIGCGTSYNAAVAVR;LPEQVDSILHKDDEIVK;LTMDQIPVSYPTK;LTPVFR;NNLVDIK;NPGKV…	1;1;1;1;1;1;1;1;1;1;1;1;1;1;1;1;1;1;1;1;1;1;1;1;1;1;1;1;1;1;1;1;1;1;1;1;1	37	62	0.6308	7842;54895;54894;54917;64426;61241;61239;26838;26839;50519;28689;52240;52241;60196;51065;12048;10070;23988;48405;43570;43569;54537;54540;36300;16572;16632;5123;18797;18796;54384;37992;37990;37989;37991;58313;54113;57804;57805;44033;1625;5821;5722;23401;23399;53824;53826;53366;30656;30654;18441;43954;43996;32563;32561;32626;32624;44760;44708;73583;73582;73575;25988	-	Glutamine--fructose-6-phosphate transaminase (isomerizing) OS=Echinococcus granulosus OX=6210 GN=EGR_08869 PE=4 SV=1	5.31945e+07	1.1821e+06
834_1	tr|H9M5P9|H9M5P9_ECHGR	45.7581	NA	54670.4	AGFFHMPEWLGASVR;AMSTLGYEWK;EIQNLWLFR;IADFGLSNIMQDGEFLR;IMLQLYQVDAR;KFFQQIISGVDYCHR;KWNPVLQHHFK;MLTVDPIKR;SQSRPWDIMQEVFR;STGVQVAVK;VITPFNIR;WHLGIR	1;1;1;1;1;1;1;1;1;1;1;1	12	14	0.2803	50895;27131;29213;56591;36817;55814;55816;41212;19692;19693;52750;9622;13609;4029	-	AMP-activated protein kinase alpha subunit OS=Echinococcus granulosus OX=6210 PE=2 SV=1	1.78076e+07	574440
687_1	tr|A0A068WE86|A0A068WE86_ECHGR	2.76792	NA	24633.5	AVEDYEPTEK	1	1	1	0.0442	26803	tr|W6UYP7|W6UYP7_ECHGR	Tetraspanin OS=Echinococcus granulosus OX=6210 GN=EGR_01395 PE=3 SV=1	2.76981e+06	307757
1576_1	tr|A0A068X1U4|A0A068X1U4_ECHGR	5.25985	NA	107999	AVTQGLVHLVR;LADFGFSNTFR;LMSQLISALNTAR;VAIPTTHFDTPK	1;0;0;0	1	1	0.047	27588;32526;40342;35584;35585	-	Serine:threonine protein kinase OS=Echinococcus granulosus OX=6210 GN=EgrG_000419700 PE=4 SV=1	0	0
22_1	tr|W6UCM0|W6UCM0_ECHGR	2.65929	NA	29640.7	LLLVAGVDR	1	1	1	0.0326	13393	tr|A0A068WFI8|A0A068WFI8_ECHGR	Protein phosphatase methylesterase-1 OS=Echinococcus granulosus OX=6210 GN=EGR_06738 PE=3 SV=1	52932.7	4812.06
876_1	tr|A0A068WJY0|A0A068WJY0_ECHGR	44.3211	NA	50463.8	EIDYETVTTLDPDHVVAIK;EYQLADSAK;FVFAAVK;IAASDYLPTLQDILR;IIHGSGYSDEER;ILYSHLVDYFPEYDGPQR;IPYENPINR;VIYSHITCATDTENIR;VPTTGIIEYPFDLDSIIFR;YYLDNIDR	1;1;1;1;1;1;1;1;1;1	10	12	0.307	61670;16866;4034;50430;37510;37511;62561;22515;55660;62279;62280;19581	tr|W6UU29|W6UU29_ECHGR	Expressed protein OS=Echinococcus granulosus OX=6210 GN=EgrG_000305900 PE=3 SV=1	4.33748e+06	197158
20_1	tr|A0A068WQM0|A0A068WQM0_ECHGR	3.37947	NA	41062	LGVDYWPVR	1	1	1	0.0241	21816	tr|W6U180|W6U180_ECHGR	Immunoglobulin OS=Echinococcus granulosus OX=6210 GN=EgrG_000362000 PE=4 SV=1	0	0
1220_1	tr|W6UNN4|W6UNN4_ECHGR	49.3943	NA	25238.7	CDGYILEGK;ELEFYSR;IIDVVYNASNNELVR;KVETTENPEDDVLLK;LDQGNFSWPTQAISR;LLACISSRPGQVGR;LPQATLSENLK;NAIVQVDSAPFR;QKLPQATLSENLK;QWYEAHYLK;VETTENPEDDVLLK	1;1;1;1;1;1;1;1;1;1;1	11	15	0.4977	18460;12697;51243;51242;51483;51259;45042;28914;35059;42981;42126;30319;29285;30317;48155	tr|A0A068WXA1|A0A068WXA1_ECHGR	40S ribosomal protein S8 OS=Echinococcus granulosus OX=6210 GN=EGR_05228 PE=3 SV=1	1.20395e+07	926115
623_1	tr|W6UQ90|W6UQ90_ECHGR	3.28057	NA	42899.2	SWVDFSSGLR	1	1	1	0.0261	25016	tr|A0A068WRW3|A0A068WRW3_ECHGR	Abhydrolase domain-containing protein 4 OS=Echinococcus granulosus OX=6210 GN=EGR_04646 PE=4 SV=1	0	0
118_1	tr|A0A068WLY7|A0A068WLY7_ECHGR	15.9028	NA	176226	GTLLHQFGR;LADLDPSLASVR;TAEEAEQLATGDR;VGWEDVEELVK	1;1;1;1	4	4	0.0288	17090;31560;38987;34189	-	Glycogen debrancher OS=Echinococcus granulosus OX=6210 GN=EgrG_000644500 PE=3 SV=1	9.18116e+06	109300
685_3	tr|A0A068WKM2|A0A068WKM2_ECHGR	223.803	NA	164931	AQHEIFITDWWLSPEVFLK;DKGTSIHCELLFIR;DYENWLFK;DYISVCGLR;EHTDWNHELLNDPVCDEFYHNVWCR;EIAFDQVK;ELVQGIHGHVVCFPDEFLCEEDLSPPQVSK;FFIPNPK;FLFVGKDYENWLFK;FQNAPPAEALK;FSTAEIGNGIQNLFAR;GGGTGGENDFAYEPNNLNITPQFTER;GGHDTAAGYEIR;GGHDTAAGYEIREDLIVLGEESK;GTSIHCELLFIR;HAHQAQMQALR;HTSTWLSSLHPNIHVIR;ICILIYR;KLIIGSANINDR;LIIGSANINDR;LLEEYLQSIVDCKPLR;LMIVDDR;LMIVDDRK;LQVPIDAPHGATEHR;LTTEFIYVHSK;MPWHDVGCVVTGSVVSDFAR;NTEE…	1;1;1;1;1;1;1;1;1;1;1;1;1;1;1;1;1;1;1;1;1;0;0;1;1;1;1;1;1;1;1;1;1;1;1;1;1;1;1;1;1;1;1;1;1;1;1;1;1;1;1	49	88	0.4157	64865;64866;50427;22432;20306;72040;72039;72041;13069;72743;8309;8308;53493;27157;27160;51714;69728;30857;30854;30856;66179;66182;41797;41799;33520;33519;58277;58276;58275;13141;34938;34869;34868;27169;27230;57764;57765;8261;15183;49143;49142;36163;62656;55750;55749;55752;28577;28523;28576;26756;26757;15168;42072;42074;42073;41250;14868;14866;59352;59350;20531;50583;14338;33290;33339;33288;33340;…	tr|W6UAU2|W6UAU2_ECHGR	Phospholipase OS=Echinococcus granulosus OX=6210 GN=EgrG_000249000 PE=3 SV=1	1.36932e+08	1.63014e+06
685_2	tr|A0A068WPA9|A0A068WPA9_ECHGR	69.4165	NA	125366	DTYLVVLKPHK;FTTELIYIHSK;GHLCEYPEDYLADEDLTFPR;IGALTNPFR;IPPILLPTPPHNTPLAAR;LMIVDDR;LMIVDDRK;LTSFAYLEEK;NCSESIHLWDSYHR;NIHVIR;NQLVENQIAQAIYDR;RPYSDDYWR;SASHWSLESTR;SGSSIHAILR;SKFEVTDLACLPLSAASLPLR;TLTSLHR;VEDYLETVINHCEVQR;VYILIPLLAAFEGVPGDKK;WDLPDHPILDVANHR	1;1;1;1;1;0;0;1;1;0;1;1;1;1;1;1;1;1;1	16	21	0.2099	34831;34832;36951;36955;65957;15136;56403;8261;15183;28086;53424;53425;2560;52652;31577;31752;17721;63847;6386;58400;59331;59332;53292;53291	-	Phospholipase OS=Echinococcus granulosus OX=6210 GN=EGR_06663 PE=3 SV=1	7.3886e+06	119171
685_1	tr|A0A068WDN0|A0A068WDN0_ECHGR	2.20847	NA	453793	LQPQLLATGAETDALLAR;NIHVIR	1;0	1	1	0.006	55375;2560	-	Dynein heavy chain OS=Echinococcus granulosus OX=6210 GN=EgrG_000596000 PE=3 SV=1	0	0
1470_1	tr|W6UWX5|W6UWX5_ECHGR	2.59159	NA	60961.3	LYATIANK	1	1	1	0.0144	9872	-	Phosphate transporter OS=Echinococcus granulosus OX=6210 GN=EGR_07181 PE=3 SV=1	392596	19629.8
29_1	tr|A0A068W8H4|A0A068W8H4_ECHGR	30.0043	NA	23887.1	ALYLIK;ASTVEEMLVK;EFVTQYR;LAYNKPNMDTQVLDAMK;NDNSGSIGLLWLTR;NLFYAGLALFPDK;NVMEPVQQLLVK	1;1;1;1;1;1;1	7	8	0.3726	1053;21947;12653;57238;57236;46457;42938;39353	-	Glycolipid transfer protein OS=Echinococcus granulosus OX=6210 GN=EgrG_000827550 PE=4 SV=1	1.16014e+07	773424
157_1	tr|A0A068WGV0|A0A068WGV0_ECHGR	3.41904	NA	18714.9	GELEAALASQGIPASETEK	1	1	1	0.1105	55970	tr|W6UFZ3|W6UFZ3_ECHGR	Calmodulin OS=Echinococcus granulosus OX=6210 GN=EgrG_000460000 PE=4 SV=1	1.75369e+06	438422
76_1	tr|W6UU26|W6UU26_ECHGR	2.94838	NA	38375.8	GFGFVTFR	1	1	1	0.0231	11994	tr|W6UUU5|W6UUU5_ECHGR;tr|W6U4U7|W6U4U7_ECHGR;tr|A0A068X4X5|A0A068X4X5_ECHGR;tr|A0A068WBR8|A0A068WBR8_ECHGR	DAZ-associated protein OS=Echinococcus granulosus OX=6210 GN=EGR_03155 PE=4 SV=1	22564.1	902.563
1347_1	tr|A0A068WX14|A0A068WX14_ECHGR	7.79133	NA	30467.2	SLPTPIPVYGGGR;VVDPDLQK	1;1	2	2	0.0755	34862;11013	tr|W6UJ86|W6UJ86_ECHGR	Hydroxyacylglutathione hydrolase OS=Echinococcus granulosus OX=6210 GN=EGR_03614 PE=3 SV=1	2.56344e+06	150791
450_1	tr|U6JCM5|U6JCM5_ECHGR	7.08619	NA	16496	ISQWEKPTGDDGK;TYYVNTVTK	1;1	2	2	0.1477	42518;20731	-	Peptidyl-prolyl cis-trans isomerase OS=Echinococcus granulosus OX=6210 GN=EGR_01100 PE=4 SV=1	703753	70375.3
70_1	tr|U6IUL2|U6IUL2_ECHGR	36.9277	NA	34371.2	AISYLSGYIVR;AQNSPTVKPWIFPEQNK;AYPEWK;GKFPSWAVNR;IAQIIAPK;KSGPDSCFFGFVTQSDPR;NLMDDDSQWR;SDSSSIHMVK;SWFQFENEYVIMNHSVFHAAAPPR;TVSVLIK	1;1;1;1;1;1;1;1;1;1	10	12	0.3941	30584;57912;57913;4605;25546;7790;59114;32836;20861;70198;70197;2942	-	PCTP protein OS=Echinococcus granulosus OX=6210 GN=EGR_00228 PE=4 SV=1	6.86196e+06	361156
456_1	tr|A0A068WL00|A0A068WL00_ECHGR	19.2815	NA	76207.6	IYVYETETFK;KPYHDVGNLR;SWLLNEFAR;VALISIPTR;VSEVSTFDR;YSAQFDAEDK	1;1;1;1;1;1	6	6	0.0851	33617;27937;23829;14133;17644;26281	tr|W6V822|W6V822_ECHGR	Eukaryotic translation initiation factor 3 subunit B OS=Echinococcus granulosus OX=6210 GN=EgrG_000445000 PE=3 SV=1	2.30367e+06	65819.2
1341_1	tr|W6UMH3|W6UMH3_ECHGR	12.7004	NA	62265	FDSSDVASAER;LLQVYR;QVLLSLTAASSSSPHR	1;1;1	3	3	0.0579	26974;4543;49475	tr|A0A068WLD3|A0A068WLD3_ECHGR	Brain protein 44-like protein OS=Echinococcus granulosus OX=6210 GN=EGR_02784 PE=3 SV=1	6.52042e+06	217347
1343_1	tr|A0A068WBK1|A0A068WBK1_ECHGR	29.1539	NA	90430.8	AVAPLIEAGFLR;FFTQAAIVR;LLFNPSTLLELEESTITK;LNTVCGYEFTSK;SCLIDSISCR;YMDDLLR;YYIYSR	1;1;1;1;1;1;1	7	8	0.0934	31566;18371;59461;59460;40363;28684;11715;8390	-	Cullin 2 OS=Echinococcus granulosus OX=6210 GN=EgrG_000981400 PE=3 SV=1	2.63519e+06	56067.9
454_1	tr|U6JQA4|U6JQA4_ECHGR	2.76792	NA	53279.9	ISVNDIFIK	1	1	1	0.0177	18126	-	Acetyltransferase component of pyruvate dehydrogenase complex OS=Echinococcus granulosus OX=6210 GN=EGR_09744 PE=3 SV=1	35301.8	1534.86
110_1	tr|A0A068W7F1|A0A068W7F1_ECHGR	38.0655	NA	38694.8	DDEQLNGKPITVPSVDCEPYR;DPSLGLCR;FIISQASWLGGR;GAFANGLPAGYYEVDVDYSYPVTQFSGTK;KNYADIIHK;SAEVEDGDVPTSK;SSVLVEFSMDNIAWK;TAALPNFR;YNVVDGVK	1;1;1;1;1;1;1;1;1	9	10	0.3576	65839;65837;11245;36012;71378;21584;35933;51394;9664;9860	-	Uncharacterized protein OS=Echinococcus granulosus OX=6210 GN=EgrG_000800700 PE=3 SV=1	4.15809e+07	3.46507e+06
155_1	tr|W6U5R6|W6U5R6_ECHGR	2.13765	NA	107724	ADALSSR	1	1	1	0.0071	976	tr|A0A068WZD7|A0A068WZD7_ECHGR	Importin N-terminal domain-containing protein OS=Echinococcus granulosus OX=6210 GN=EGR_08630 PE=4 SV=1	1.89229e+06	47307.3
780_1	tr|W6UFN6|W6UFN6_ECHGR	10.5197	NA	143471	ATDVMLAGK;TGVPVFAWK	1;1	2	2	0.0139	10591;15943	tr|A0A068WTV2|A0A068WTV2_ECHGR	Adenosylhomocysteinase OS=Echinococcus granulosus OX=6210 GN=EGR_05478 PE=3 SV=1	7.20366e+06	101460
409_1	tr|W6UM68|W6UM68_ECHGR	26.6145	NA	27607.2	LLEIENLVVAPITDSPKPPPNR;LSPAPVVHK;VFVSASEEAFK;VMFIVTGANK;VTLTLPVINK;VVPFDDPESTFGVYQR	1;1;1;1;1;1	6	6	0.3095	65609;12993;28896;20135;21344;54770	tr|A0A068WNB7|A0A068WNB7_ECHGR	6-phosphogluconolactonase OS=Echinococcus granulosus OX=6210 GN=EGR_02436 PE=3 SV=1	3.89893e+06	324910
772_1	tr|A0A068W9N8|A0A068W9N8_ECHGR	12.0256	NA	31509	ESVEEEGDAIPIYRPDLVMIGGMK;TNTQTASVLK;TVYPTEELR	1;1;1	3	3	0.1536	68285;19040;22015	tr|W6UJV7|W6UJV7_ECHGR	LIM and SH3 domain protein 1 OS=Echinococcus granulosus OX=6210 GN=EGR_03829 PE=4 SV=1	489026	34930.4
1723_1	tr|U6JCJ6|U6JCJ6_ECHGR	37.3147	NA	24396.4	GEIQFNVWDTAGQEK;HLTGEFEK;KYVATLGVEVHPLSFHTNR;LVLVGDGGTGK;NLQYYDISAK;SNYNFEKPFLWLAR;VCENIPIVLCGNK;VDIKDR;YVATLGVEVHPLSFHTNR	1;1;1;1;1;1;1;1;1	9	16	0.4465	51309;51308;13644;61830;61831;61829;16449;16443;28948;52918;52917;52943;45124;2275;59268;59269	-	GTP-binding nuclear protein OS=Echinococcus granulosus OX=6210 GN=EGR_04178 PE=3 SV=1	2.47263e+07	2.24784e+06
153_1	tr|A0A068WFQ1|A0A068WFQ1_ECHGR	45.5099	NA	46487	AFSEENPSVHSQLPK;ALQLIYFFTAGKDEVK;AVDGIFQVLR;FDYLCEHYQPVSR;FNAGAGLK;HLLCEER;IFDDPDVSHVEGDVDPIRDLEIIR;IIQTGYK;QKPDYDCIAK;STFFNVLTTSAAAAANFPFCTIEPNESR;VAVPDER	1;1;1;1;1;1;1;1;1;1;1	11	13	0.3502	49906;49905;54468;22689;51114;3821;13411;69424;69423;6131;29281;71146;4191	tr|W6UGS0|W6UGS0_ECHGR	Obg-like ATPase 1 OS=Echinococcus granulosus OX=6210 GN=EGR_04341 PE=3 SV=1	6.76603e+06	241644
779_1	tr|W6V5E3|W6V5E3_ECHGR	50.2992	NA	338483	AFYDPSLFLR;FAVIMSALPELR;FGTGETESVSR;FYDVLTLIK;LELLHFLAK;LFNNPQQLLLITR;LVETNQYER;NAILSAPVSDTLQK;STLCESLEEYVK;TAGSVQQNLAWLSR;TYEALAR;VAHDTGIDSISSQPPSTTSTLGR;VVIDELMR	1;1;1;1;1;1;1;1;1;1;1;1;1	13	14	0.0499	29732;36659;26038;22257;20391;20390;47298;24875;42341;42369;45824;6174;64452;14394	-	Ubiquitin hydrolase FAF-X OS=Echinococcus granulosus OX=6210 GN=EGR_03548 PE=4 SV=1	2.84003e+06	19319.9
1008_1	tr|A0A068WKM7|A0A068WKM7_ECHGR	2.65351	NA	65997	LFFLQVK	1	1	1	0.0121	9933	-	Radixin OS=Echinococcus granulosus OX=6210 GN=EgrG_000598050 PE=4 SV=1	317274	9331.6
519_1	tr|U6J907|U6J907_ECHGR	59.5326	NA	27959.2	ANPGDPLYTEEK;DRDSAINYLK;DSAINYLK;EALSLLSEH;KANPGDPLYTEEK;LAQDNEESDPVITYYCR;LLDYLSEAK;LYVASMGLRPEFK;NVKPVAGPLTEGDASVTPNIAGLHQDPLPPTTSK;QALDHFTVAFK;QDPAPAEPAEHGSGSHGGDK;SGELSVDTCEK;VGLEYVER;VLYLIDCK	1;1;1;1;1;1;1;1;1;1;1;1;1;1	14	26	0.6392	35939;35937;27690;27692;27750;11637;15626;42564;42565;42567;59954;59936;18307;45660;45659;72602;72603;72606;72605;72604;31712;56607;56608;29507;13872;16838	-	Vacuolar protein sorting-associated protein OS=Echinococcus granulosus OX=6210 GN=EGR_04361 PE=3 SV=1	1.22593e+08	9.43019e+06
348_1	tr|W6VCI4|W6VCI4_ECHGR	25.738	NA	133342	AADISTPTTTPDVQPR;KLSLLQK;LLAHPHALR;LLDLPVNNK;LSLLQK;WVLPAQGPSK;WVLVITQSAEAAR	1;1;1;1;1;1;1	7	8	0.0542	49909;6524;17036;16939;16974;179;20324;41712	tr|A0A068W923|A0A068W923_ECHGR	General transcription and DNA repair factor IIH helicase subunit XPD OS=Echinococcus granulosus OX=6210 GN=EGR_00549 PE=3 SV=1	5.92097e+06	84585.4
74_1	tr|W6UHV2|W6UHV2_ECHGR	212.624	NA	70429	AEADKITDELLK;AINPEAGFFGVAPGTNHK;AVKEELEEQR;CLHSIGLPLPHEGVK;DIFICDGSK;DLDESLRDR;EELEEQR;FAWPGFGNNIR;FCCPASQCPIIHPK;FFWEGLESEYKPEIK;FLDDQVGVDLPK;FNDKGELR;FPGCMNDR;FQTVPHVAEGVK;FSDLPQVAQPFVGHWANVCTPK;FVCAAFPSACGK;GILGQWISPK;GKFSDLPQVAQPFVGHWANVCTPK;HGVMIGAQVK;IAYDEGWMAEHMLIMSVTNPK;IAYDEGWMAEHMLIMSVTNPKGEEK;IFHVNWFR;ITDELLK;KGSINMEGLDCDWDAIFGLEK;LAAYENNFICCTDPK;LAAYENNFICCTDPKDVAR;LIMSFGSGYGGNSLLGK;L…	1;1;1;1;1;1;1;1;1;1;1;1;1;1;1;1;1;1;1;1;1;1;1;1;1;1;1;1;1;1;1;1;1;1;1;1;1;1;1;1;1;1;1;1;1	45	108	0.8089	36566;54051;54081;54052;54078;54076;54075;54079;54077;29864;29866;49550;49549;18466;22722;12112;32770;32848;32852;32847;32771;51137;51138;51135;51136;55966;55965;36561;14626;15503;15502;34765;34764;66669;66668;66667;66666;34881;21406;21408;68674;17681;65900;65899;70203;70202;22745;22806;22809;22747;22805;22807;22808;6617;65402;65403;53741;53777;53776;53778;53779;63221;50802;50777;12978;43978;4393…	-	Phosphoenolpyruvate carboxykinase (GTP) OS=Echinococcus granulosus OX=6210 GN=EGR_07484 PE=3 SV=1	4.29907e+08	9.7706e+06
1244_1	tr|W6ULS9|W6ULS9_ECHGR	2.57359	NA	75051.6	LDLAEGFLR	1	1	1	0.0134	17369	-	Conserved oligomeric Golgi complex subunit 6 OS=Echinococcus granulosus OX=6210 GN=EGR_03029 PE=3 SV=1	35654	1048.65
151_1	tr|U6IYB8|U6IYB8_ECHGR	5.25985	NA	60018.7	YLEIVSPLLGPK	1	1	1	0.022	35712	-	Leucine-rich repeat-containing protein 47 OS=Echinococcus granulosus OX=6210 GN=EGR_06160 PE=4 SV=1	0	0
786_1	tr|A0A068WLM2|A0A068WLM2_ECHGR	2.04285	NA	37813.3	SLRPQIR	1	1	1	0.0217	8631	tr|W6UR74|W6UR74_ECHGR	Uncharacterized protein OS=Echinococcus granulosus OX=6210 GN=EgrG_000539700 PE=4 SV=1	1.3866e+06	63027.3
1037_1	tr|A0A068WD16|A0A068WD16_ECHGR	2.52576	NA	39882.6	VAIQYFQPSAPR	1	1	1	0.0332	38329	tr|W6UU89|W6UU89_ECHGR	mRNA export protein rae1 OS=Echinococcus granulosus OX=6210 GN=EgrG_000796200 PE=3 SV=1	0	0
1143_1	tr|A0A068WLA1|A0A068WLA1_ECHGR	30.1436	NA	107162	IAIVGPNGVGK;LADIGLK;LLTGELTPTEGER;LNLLQELETLR;QLFYYR;QLIAKPK;RLNLLQELETLR;TVLNENQLDIK	1;1;1;1;1;1;1;1	8	8	0.0697	16935;1465;40230;36387;9656;4814;44288;33291	-	ATP binding cassette sub family F OS=Echinococcus granulosus OX=6210 GN=EgrG_000523700 PE=4 SV=1	8.3737e+06	167474
1443_1	tr|A0A068WWV0|A0A068WWV0_ECHGR	5.25985	NA	24133.3	GFDESVEVVK	1	1	1	0.0465	22055	tr|W6UFR4|W6UFR4_ECHGR	Ovarian cancer associated gene 2 protein OS=Echinococcus granulosus OX=6210 GN=EgrG_000339800 PE=3 SV=1	891502	127357
79_1	tr|W6UD48|W6UD48_ECHGR	14.3936	NA	145253	FVIFPLVNLAASGSGVK;LATAACPPGQR;SVADILTLRPEALK;VFACDSSEPLTDNVHFGLFLPK	1;1;1;1	4	4	0.0484	51249;24225;45631;66600	-	Tyrosine--tRNA ligase OS=Echinococcus granulosus OX=6210 GN=EGR_06392 PE=3 SV=1	69148	1047.7
1729_1	tr|U6FTV2|U6FTV2_ECHGR	43.2999	NA	150536	DTADIATHSSSFHR;GVQLIAPNDLLEAAR;LLQPLLEQR;LLSPTQLLNAVK;LTLTSHR;QAGIAPVLAR;SMLAQTVSADR;VAMAAGLDYIR;VLQLASESEEATLK;VWTVALKPGSGHVGVAGIER	1;1;1;1;1;1;1;1;1;1	10	11	0.0924	46417;47584;22128;33901;6384;15495;26686;26767;45228;59141;59142	-	XK-related protein OS=Echinococcus granulosus OX=6210 GN=EgrG_000096100 PE=3 SV=1	7.07135e+06	105542
784_1	tr|A0A068WYU4|A0A068WYU4_ECHGR	9.4783	NA	41022.2	LNDSTPAEIDYIK;NQLAEVLLEHTGVK	1;1	2	2	0.0726	43393;46658	tr|W6UCB6|W6UCB6_ECHGR	Actin protein 9 OS=Echinococcus granulosus OX=6210 GN=EGR_06853 PE=3 SV=1	1.24874e+06	54293
293_2	tr|A0A068WEN2|A0A068WEN2_ECHGR	30.2523	NA	24373.2	AAQEIPEDITSAPAEQFYQYLK;LLTPPSGVPDDLIK;NFTEEQLK;SGLVLGYLMASLKPDR;VSDKPIFETNR;VSSLGVNMWK;YNAEEAGK	1;1;0;1;1;1;1	6	10	0.4064	66844;66846;42748;42749;16100;51271;34400;34401;22882;22932;9276	-	Calponin OS=Echinococcus granulosus OX=6210 GN=EgrG_000595700 PE=3 SV=1	1.62695e+07	1.80772e+06
1372_1	tr|W6UNE1|W6UNE1_ECHGR	15.8712	NA	29929.9	DFYFSK;FNTNLEHEYIANFK;LRDIEDLCR;QLQAIFK;TTIATTVR	1;1;1;1;1	5	5	0.166	5252;51726;27411;7487;8315	-	Microtubule-associated protein RP/EB family member 3 OS=Echinococcus granulosus OX=6210 GN=EGR_01924 PE=3 SV=1	2.52345e+06	126172
403_1	tr|W6V9S3|W6V9S3_ECHGR	8.02948	NA	63591.8	HEAADGYCDR;LSLYYTNPK	1;1	2	2	0.0329	27591;21390	tr|A0A068WEK3|A0A068WEK3_ECHGR	Delta-like protein OS=Echinococcus granulosus OX=6210 GN=EGR_01506 PE=4 SV=1	1.02718e+07	395071
293_1	tr|A0A068WKR6|A0A068WKR6_ECHGR	4.93336	NA	28103.1	ISDKPIFETNR;NFTEEQLK;YDAEEAAK	1;0;1	2	2	0.1076	35220;16100;9982	-	Myophilin OS=Echinococcus granulosus OX=6210 GN=EgrG_000595600 PE=3 SV=1	889593	88959.3
1327_1	tr|W6UFM2|W6UFM2_ECHGR	22.6366	NA	110484	IYLDMLNIYR;LLSEQINASIATHGEQVVK;LSENVLR;SAQNDLVEGLFR;SFLVIVIR;VVELFDLTTSK	1;1;1;1;1;1	6	6	0.069	34860;59206;6557;36750;12949;31249	tr|A0A068WWG2|A0A068WWG2_ECHGR	Exportin-1 OS=Echinococcus granulosus OX=6210 GN=EGR_05229 PE=3 SV=1	1.52345e+07	304690
981_1	tr|U6IUA6|U6IUA6_ECHGR	6.5618	NA	28635	IAALVVEK;MTWSVNLER	1;1	2	2	0.0649	7206;23818	-	Cysteine-rich secretory protein LCCL domain-containing OS=Echinococcus granulosus OX=6210 GN=EGR_07496 PE=4 SV=1	1.10673e+06	85132.8
782_1	tr|W6UWK5|W6UWK5_ECHGR	5.25985	NA	130773	ASLVRPGLALCHFGNPLSVGEGATCALR;ASVTFTIDAGDKDHTSDNLELK;DRDGPVVLVGDDEFQSVEVK;DTQILPGYWAPR;DVDLVDLSSPIR;EGSGFVVLNVIEK;ENTGQSLITFGNECESR;EPGATNKPPSPAELDQATPVR;GPNQIVIPQVK;HSLVPNSR;KCNPILLPQFEYSVTR;KTDIAYVGDYSLLGSSSVLSDR;LDSLEVCTR;LEIFVLR;LLFYLLEKPYITK;LLLTINPPDHWLNEEFTNK;LVNPYNYR;LWDNTMR;MLAPATDSITVK;TGILTFEMPAR;VGDPEVGEFYR;VYSSASDSERPIVSVFGAPGVPQTWDR;WLLDAPSPSSPFADLINYPINNPR	0;0;1;0;0;0;0;0;0;0;0;0;0;0;0;0;0;0;0;0;0;0;0	1	1	0.2941	70499;65123;62399;40272;35689;39034;56974;61970;27648;27587;10783;57546;64706;64705;21006;9683;49155;49154;63928;17611;12274;30896;30215;32172;70378;68805;68806	-	Integrin alpha ina-1 OS=Echinococcus granulosus OX=6210 GN=EGR_00285 PE=3 SV=1	1.04458e+06	17704.8
782_2	tr|A0A068WCN4|A0A068WCN4_ECHGR	2.57727	NA	126788	ASLVRPGLALCHFGNPLSVGEGATCALR;ASVTFTIDAGDKDHTSDNLELK;DTQILPGYWAPR;DVDLVDLSSPIR;EGSGFVVLNVIEK;ENTGQSLITFGNECESR;EPGATNKPPSPAELDQATPVR;GPNQIVIPQVK;HSLVPNSR;KCNPILLPQFEYSVTR;KTDIAYVGDYSLLGSSSVLSDR;LDSLEVCTR;LEIFVLR;LLFYLLEKPYITK;LLLTINPPDHWLNEEFTNK;LVNPYNYR;LWDNTMR;MLAPATDSITVK;TGILTFEMPAR;VGDPEVGEFYR;VNFDIHK;VYSSASDSERPIVSVFGAPGVPQTWDR;WLLDAPSPSSPFADLINYPINNPR	0;0;0;0;0;0;0;0;0;0;0;0;0;0;0;0;0;0;0;0;1;0;0	1	1	0.2928	70499;65123;40272;35689;39034;56974;61970;27648;27587;10783;57546;64706;64705;21006;9683;49155;49154;63928;17611;12274;30896;30215;32172;8754;70378;68805;68806	-	Integrin alpha ps OS=Echinococcus granulosus OX=6210 GN=EgrG_000782500 PE=3 SV=1	0	0
1141_1	tr|U6JIF4|U6JIF4_ECHGR	10.7516	NA	9964.1	GLIFFK;HGILLFR;TGADNQGIASYVR	1;1;1	3	3	0.2921	1227;7894;36924	-	Dynein light chain OS=Echinococcus granulosus OX=6210 GN=EGR_08563 PE=3 SV=1	830946	166189
983_1	tr|U6J1I3|U6J1I3_ECHGR	19.5906	NA	15686.7	KYSFEEEAIYSHSPGAR;QAAAYIK;RVTYTYENNQLLEDGQPVK;VTYTYENNQLLEDGQPVK	1;1;1;1	4	5	0.3139	57663;57662;3174;63442;60702	-	Dynein light chain OS=Echinococcus granulosus OX=6210 GN=EGR_03188 PE=3 SV=1	4.08605e+06	510756
1271_1	tr|U6J6Z7|U6J6Z7_ECHGR	124.29	NA	112750	AAEAAAAHQEGENTEVAGLK;AGHAPSAVVCGGGGGGANVR;ALEETMLK;ANEQLLAGSGSTNK;EAELAVR;EFNTLATLR;EILAGQSEIR;ELIGEEEEDESSQWGSLAQR;ESEVQLAR;FVSTPAEVFDIIDEGK;HLRDELETK;ILQESLGGNAK;IRDLLDVSK;ISFLENNLAK;KQLETATLR;LDEEATVMR;LEAETSLADVAQLQAECQSSKEEAK;LEAVEKEETR;LFVEDLK;LYLVDLAGSEK;NIVTVNEELTADEWR;QENLETQK;QLIHDNAELR;QLQDLVDNLNADVAK;QSEQYAQQVK;SLSALGNVINALVDNHAHVPYR;TYAFDNVFQPK;VQNVQLLR;VQSLTDK;VRPLNENEK;YAEILGALVR	1;1;1;1;1;1;1;1;1;1;1;1;1;1;1;1;1;1;1;1;1;1;1;1;1;1;1;1;1;1;1	31	42	0.3674	57588;57589;52022;52021;12245;38949;4314;19159;22526;63881;12066;52443;24159;24161;23455;23507;18794;18795;24689;24758;18872;19079;69176;28275;28278;8363;28533;53021;15163;28595;28596;27507;49517;28579;27495;64886;64889;35745;14125;4484;21394;21830	-	Kinesin-like protein OS=Echinococcus granulosus OX=6210 GN=EGR_02990 PE=3 SV=1	7.20245e+07	1.20041e+06
496_1	tr|A0A068WWW2|A0A068WWW2_ECHGR	33.3042	NA	93559.8	DGLASIPHFDLLK;FISPEVNVVLLR;LAEMWVK;LYQSLADTTK;NANDLSCPGFR;TSLVSHIR;VLFVAPNAHQLR;YYVATTVAPTADLLK	1;1;1;1;1;1;1;1	8	9	0.1005	40825;40824;38769;9011;24099;31157;10957;37668;48726	-	Microtubule associated protein 1A OS=Echinococcus granulosus OX=6210 GN=EgrG_000733000 PE=4 SV=1	3.23717e+06	85188.7
789_1	tr|W6U8W2|W6U8W2_ECHGR	25.3226	NA	70584.8	ATNYEYAAWQVK;FGPAQSLR;STLDNHNLSITEWEER;TPGQDPSDQFAK;VFLEQDFFK;VYSAILSEK	1;1;1;1;1;1	6	7	0.1049	41687;8954;57020;57015;33504;26243;16153	tr|A0A068WT26|A0A068WT26_ECHGR	Moesin OS=Echinococcus granulosus OX=6210 GN=EGR_07279 PE=4 SV=1	5.85988e+06	167425
295_1	tr|A0A068WXW0|A0A068WXW0_ECHGR	10.5197	NA	18374	AGAAAAWEAENACSVSK;CDSAILAAER	1;1	2	2	0.1579	50509;21868	-	Ubiquitin carboxyl terminal hydrolase 5 (Fragment) OS=Echinococcus granulosus OX=6210 GN=EgrG_002006000 PE=4 SV=1	72681	6056.75
494_2	tr|A0A068WB55|A0A068WB55_ECHGR	5.25985	NA	19910	LPTEEYYHHLIK;RDDVCNALR	1;0	1	1	0.1221	46371;22718	-	Calcium binding EF hand domain containing protein OS=Echinococcus granulosus OX=6210 GN=EgrG_001001300 PE=4 SV=1	492969	49296.9
494_1	tr|W6UUJ4|W6UUJ4_ECHGR	3.28057	NA	28705.8	RDDVCNALR;VSTNLWFNHK	0;1	1	2	0.0763	22718;30798;30879	-	Dynein light chain 1 cytoplasmic OS=Echinococcus granulosus OX=6210 GN=EGR_00895 PE=4 SV=1	857033	65925.6
1530_1	tr|A0A068WCI0|A0A068WCI0_ECHGR	43.9801	NA	26359.3	AGKFPTAVSHQEPLLQK;ANNIPCMDVDELK;ANNIPCMDVDELKK;EIEDMLSYSLK;FLETVELQVALK;FPTAVSHQEPLLQK;FSVCVLGDQQHCDEAK;ILGPGLNK;KYQAFLASESVIR;YQAFLASESVIR	1;1;1;1;1;1;1;1;1;1	10	14	0.3957	54695;54696;45253;49281;35621;38978;47981;55653;55652;5523;44954;44953;38640;38641	tr|W6UWP2|W6UWP2_ECHGR	Ribosomal protein OS=Echinococcus granulosus OX=6210 GN=EgrG_000776500 PE=3 SV=1	2.22992e+07	1.48661e+06
73_1	tr|A0A068WLB6|A0A068WLB6_ECHGR	2.87199	NA	58141.2	INLQNVLSR	1	1	1	0.0174	18710	tr|W6UPL9|W6UPL9_ECHGR	TBC1 domain family 5 OS=Echinococcus granulosus OX=6210 GN=EgrG_000454000 PE=4 SV=1	41861.1	1820.05
1147_1	tr|A0A068WVK9|A0A068WVK9_ECHGR	5.25985	NA	15676.3	LPAEEAVYDDEDETVVSER	1	1	1	0.1319	61789	-	Solute carrier family 1 protein OS=Echinococcus granulosus OX=6210 GN=EgrG_001168100 PE=4 SV=1	0	0
297_1	tr|W6U7B9|W6U7B9_ECHGR	83.5951	NA	127861	AGAYIGASFATK;ASQSPAVIVVKPTLYR;ETGFSQAVLNK;FGTLSEYFDLVHSR;FIYAEVAYLDR;FTLLAGLYDK;GLDATVDFLGK;GLNEPLINVKPSR;KPGALGPLFHLSAGPIHLEPLEVVR;KQNLEFIWR;MSQPVEALR;NADILFSIASHWSAAAHK;SNLMELTFDR;STSASPDLNIVIPR;SVFSILVER;TVHACGATYLCDSACDCSPQDESSIR;VPVEVDVPHNIVEQK;VTLKPVSK;VTLLSGQSVGVLAGENPGEIK	1;1;1;1;1;1;1;1;1;1;1;1;1;1;1;1;1;1;1	19	22	0.2302	25229;51463;27631;49923;49924;37358;24166;23831;41351;68276;30112;30108;17190;56914;56913;29566;42970;18189;70698;50821;8728;59854	-	Alpha-mannosidase 2 OS=Echinococcus granulosus OX=6210 GN=EGR_08871 PE=3 SV=1	1.2372e+07	220928
989_1	tr|W6UKB0|W6UKB0_ECHGR	24.589	NA	69963.7	IGNTLIELVATDNR;ILTSSLYK;LGVPGLPR;LILAPEGAK;LVLQDVPNLINLQQGFTALR;SLDLSLNGLTHLTR	1;1;1;1;1;1	6	9	0.1134	45756;45755;11691;5399;10897;63167;63166;46300;46299	-	Platelet glycoprotein V OS=Echinococcus granulosus OX=6210 GN=EGR_06534 PE=4 SV=1	3.42803e+06	107126
492_1	tr|A0A068WRP3|A0A068WRP3_ECHGR	6.54467	NA	48849.3	FREDEAVR;LFLVLKPHLK	1;1	2	2	0.0421	16733;28547	-	Myosin xviiia OS=Echinococcus granulosus OX=6210 GN=EgrG_000250300 PE=4 SV=1	170296	6081.99
545_1	tr|A0A068WXH0|A0A068WXH0_ECHGR	29.7226	NA	66470.7	AAAGIAAGAATGYVAGK;AVSSFLAFGPVLNQVPCKPSAFSESDIER;KAAAGIAAGAATGYVAGK;LLGNGCFQWFDSK;NGKPYTIVYK;SFGVPHEANQR;TAVSFFR	1;1;1;1;1;1;1	7	7	0.1443	40469;71491;46536;47346;27016;30562;6370	tr|W6U3V1|W6U3V1_ECHGR	Pleckstrin y OS=Echinococcus granulosus OX=6210 GN=EgrG_000358300 PE=4 SV=1	3.59008e+06	149587
490_3	tr|A0A068WTS7|A0A068WTS7_ECHGR	23.3358	NA	14963.7	EAFLGTWK;EVSSLITLENGVMK;MATSLKPDLIISDLGDGK;QEQVGEDITVHIER;SECSFK;SEGLEDVMER;VDMQLR;VVEGNELK	0;1;1;1;1;1;1;0	6	6	0.6316	13181;45383;55193;49456;2780;25702;3003;9560	tr|W6UFM4|W6UFM4_ECHGR	Fatty acid binding protein, adipocyte OS=Echinococcus granulosus OX=6210 GN=EGR_04945 PE=3 SV=1	3.48769e+06	317063
490_2	tr|Q5Q030|Q5Q030_ECHGR	23.9359	NA	15085.7	EAFLGTWK;EVTPDSR;EVTSLITVENGVMK;FKEVTPDSR;KMGNLVKPNLIVTDLGGGK;MGNLVKPNLIVTDLGGGK;SEGFDKIMER;VVEGNELK	0;1;1;1;1;1;1;0	6	13	0.5113	13181;5077;45377;45379;45375;45384;20061;57297;57318;57655;57296;54029;54030;28750;9560	tr|A0A068WLT8|A0A068WLT8_ECHGR	Fatty acid binding protein OS=Echinococcus granulosus OX=6210 PE=3 SV=1	2.14853e+07	1.79044e+06
490_1	tr|W6UDS5|W6UDS5_ECHGR	23.6857	NA	16430.3	DADTYCIAVSSIK;EAFLGTWK;HIQVGGGETIITTR;LDQEFEEACSGGATMK;TINGNIMTVVYTVGDLTCSR;VDSNGDFHK	1;0;1;1;1;1	5	8	0.5333	41631;13181;43535;52577;62612;62608;62609;16626;16627	-	Fatty acid-binding protein OS=Echinococcus granulosus OX=6210 GN=EGR_05655 PE=3 SV=1	2.74091e+06	210839
1145_1	tr|W6U9U3|W6U9U3_ECHGR	2.18946	NA	93690.3	IGLPRR	1	1	1	0.0072	594	-	Uncharacterized protein OS=Echinococcus granulosus OX=6210 GN=EGR_07832 PE=4 SV=1	303525	5726.89
1498_1	tr|W6U9Q5|W6U9Q5_ECHGR	26.9677	NA	20004.7	FTPNGETIDAIIGLESR;GINFLDIFPIFR;GTYNLEYGSAAFELQK;KGINFLDIFPIFR;RFTPNGETIDAIIGLESR;VPFVPIR	1;1;1;1;1;1	6	6	0.2951	54231;42083;53075;47587;58010;6393	-	Adenine phosphoribosyltransferase OS=Echinococcus granulosus OX=6210 GN=EGR_09920 PE=3 SV=1	1.32757e+07	1.0212e+06
1264_1	tr|W6UBM1|W6UBM1_ECHGR	34.591	NA	33859.4	EFNVPYFDMQDVR;KVMEITLK;SMVLAEVNTSLGSPK;TTVNSAVELIK;VLAQTGHLR;VNDYGEITQPK;YASCTGTPVPGGLSLEEGK;YSPNSQVHLSFDIDSLDPK	1;1;1;1;1;1;1;1	8	10	0.3376	49617;13726;45923;26406;26478;15448;31961;32003;56511;61746	-	Arginase OS=Echinococcus granulosus OX=6210 GN=EGR_06681 PE=3 SV=1	6.58621e+06	346642
667_1	tr|W6USH7|W6USH7_ECHGR	14.0926	NA	56194.4	KGDTNVALEDDALR;LLDAIVSGINDESEGGK;QSGQGGHSAAATAAAATQLK	1;1;1	3	3	0.1016	45177;51189;54020	-	Transmembrane protein 87A OS=Echinococcus granulosus OX=6210 GN=EGR_08764 PE=4 SV=1	1.62217e+06	81108.6
1510_1	tr|U6IZK7|U6IZK7_ECHGR	12.8428	NA	12429.1	CNNLSFLIYK;FLEVVQTACQIHDNLVDLSTSIK;GPEDPCEVR	1;1;1	3	3	0.3962	32366;68091;18733	-	Dynein light chain OS=Echinococcus granulosus OX=6210 GN=EGR_00996 PE=3 SV=1	423518	70586.3
1527_1	tr|A0A068WLY9|A0A068WLY9_ECHGR	4.21845	NA	22367.2	GSVHHFAQQPR	1	1	2	0.0573	31964;31966	-	Expressed protein OS=Echinococcus granulosus OX=6210 GN=EgrG_000646900 PE=4 SV=1	643174	64317.4
661_1	tr|A0A068WB44|A0A068WB44_ECHGR	22.5499	NA	26106.5	CLPGVHVTTGTDAGTAR;FDALLIPGGFGAATTLSNFASAGASCEVLQDVK;KPIGLCCIAPVLAAR;VALILHGCGVFDGSEIHEATSMLVHLSK;VLEDFVHAK	1;1;1;1;1	5	7	0.4146	51094;72195;49078;49079;70956;70957;18696	-	ES1 protein mitochondrial OS=Echinococcus granulosus OX=6210 GN=EgrG_000999800 PE=4 SV=1	830287	59306.2
1262_1	tr|A0A068WM41|A0A068WM41_ECHGR	5.25985	NA	71253	TNVLQSVLAQR	1	1	1	0.0176	29747	tr|W6UKU6|W6UKU6_ECHGR	Phosphatidylinositide phosphatase sac1 OS=Echinococcus granulosus OX=6210 GN=EgrG_001151400 PE=4 SV=1	0	0
453_1	tr|A0A068WV09|A0A068WV09_ECHGR	5.25985	NA	101718	LDLVAIPDFACGAMENWGLVTYR	1	1	1	0.0253	68023	tr|W6U0A1|W6U0A1_ECHGR;tr|A0A068WR84|A0A068WR84_ECHGR	Aminopeptidase OS=Echinococcus granulosus OX=6210 GN=EgrG_000350500 PE=3 SV=1	0	0
663_1	tr|A0A068WRQ4|A0A068WRQ4_ECHGR	2.39458	NA	71794.3	LLALLVK	1	1	1	0.0106	3395	tr|W6UFF6|W6UFF6_ECHGR	Glutathione gamma-glutamylcysteinyltransferase OS=Echinococcus granulosus OX=6210 GN=EGR_05319 PE=4 SV=1	0	0
1726_1	tr|U6J309|U6J309_ECHGR	15.8462	NA	50556.6	FGIQLLTPASR;LDPSIYESLQK;TAIALAISQELGNR;VSEEAFQR	1;1;1;1	4	4	0.0965	28230;33629;42345;13901	-	RuvB-like helicase OS=Echinococcus granulosus OX=6210 GN=EGR_01542 PE=3 SV=1	3.22313e+06	146506
1346_1	tr|A0A068WA55|A0A068WA55_ECHGR	56.9386	NA	83594.7	ALHNAHGYLYWAELFHPAIEVAHNGFPVHPDLLK;APGHRPLLPFSPVFFETAQQK;KLAWGEASELALIYHR;LAWGEASELALIYHR;LFSSVGQGGVNSR;LGHNVENAVDGDFR;LQHTSNGGDEFHVLLEPGFNSAVGEELK;LQHTSNGGDEFHVLLEPGFNSAVGEELKK;NILSIESR;QVSLLGDPYNPTTGKK;SFPSPFAGGILTTTVLANLDILNHQRPLNAR;VASDASLAPFAQHFLK	1;1;1;1;1;1;1;1;1;1;1;1	12	20	0.2558	73715;73714;73716;73713;64979;64983;54803;51450;34533;34584;46391;46361;70971;71493;12084;50780;72238;72237;50816;50813	tr|W6UFF3|W6UFF3_ECHGR	Gamma glutamyltransferase 1 OS=Echinococcus granulosus OX=6210 GN=EgrG_000761500 PE=4 SV=1	6.12406e+06	226817
451_1	tr|W6UJQ3|W6UJQ3_ECHGR	9.21293	NA	106671	ADTTEEGISTTFPK;VLINLISKPDWYLR	1;1	2	2	0.0296	44202;51490	tr|A0A068WXK8|A0A068WXK8_ECHGR	Glutathione transferase OS=Echinococcus granulosus OX=6210 GN=EGR_03311 PE=3 SV=1	885325	21079.2
498_1	tr|W6UIA9|W6UIA9_ECHGR	3.95308	NA	85789.9	SATAIHAANVASGR	1	1	2	0.0182	35530;35531	tr|A0A068WT84|A0A068WT84_ECHGR	Eukaryotic translation initiation factor 2A OS=Echinococcus granulosus OX=6210 GN=EGR_03890 PE=3 SV=1	0	0
1536_1	tr|W6UR96|W6UR96_ECHGR	2.70308	NA	14179.2	ISIAGSAPSR	1	1	1	0.0781	13551	-	Uncharacterized protein OS=Echinococcus granulosus OX=6210 GN=EGR_02005 PE=4 SV=1	2.73646e+06	456076
658_1	tr|A0A068WVY3|A0A068WVY3_ECHGR	80.0175	NA	146785	ADVYFK;FTLEEISDTR;HAQQHVYDIESK;ILVNSVHLR;INGAWWSVDTVK;INPGAAPPALVDAR;KAPPHLSAATR;KGDLVTLK;LDPSQPR;LLAQFTDQLQSK;LLDGSTSDYAWVNTLPK;LSLMDWGEPPQILR;RYEEEGEIIEK;SILADPQCNQYTR;SSISWLIIAGTSPK;SVEEDKEALTPGR;TNEGDTLLYLADK;VPVLIYSLPR;VTVIYPFGDNR	1;1;1;1;1;1;1;1;1;1;1;1;1;1;1;1;1;1;1	19	21	0.1616	2070;28694;42205;42203;18268;38278;37489;24694;8867;5551;39080;55338;49495;39200;39201;47166;42495;41050;42110;25250;32929	-	Integrin alpha ps OS=Echinococcus granulosus OX=6210 GN=EgrG_000192500 PE=3 SV=1	11550580	172397
1509_1	tr|W6ULU8|W6ULU8_ECHGR	12.0584	NA	17494.3	IAGYLTHLMK;IQAGPIR;VTADVAIVGSK	1;1;1	3	4	0.1818	24572;24573;2668;18866	tr|A0A068WYJ9|A0A068WYJ9_ECHGR	40S ribosomal protein S17 OS=Echinococcus granulosus OX=6210 GN=EGR_03127 PE=3 SV=1	1.86292e+06	169357
1604_1	tr|U6JM50|U6JM50_ECHGR	32.4154	NA	29919.3	AITVFSPDGHLFQVEYAQEAVK;ALFEVVQTGAK;GADCVVLCVEK;MLTTEEIEEYVK;NYSEAAVTTQEATIK;RPFGVSTLLCGVNQDGSTHLYQTDPSGTHFEWLANAIGK;RSDYKPGEPIAEWK	1;1;1;1;1;1;1	7	8	0.4644	66063;25618;31098;43647;48716;74049;74048;50061	-	Proteasome subunit alpha type OS=Echinococcus granulosus OX=6210 GN=EGR_04632 PE=3 SV=1	1.05047e+07	750333
1328_1	tr|A0A068X180|A0A068X180_ECHGR	6.80814	NA	32542.6	FLEDYDTIHFFGDK;GTFVEFR	1;1	2	2	0.0737	51905;7869	tr|W6UB48|W6UB48_ECHGR	Phosphomannomutase OS=Echinococcus granulosus OX=6210 GN=EGR_06847 PE=3 SV=1	320225	15248.8
459_1	tr|A0A068WSH7|A0A068WSH7_ECHGR	70.9385	NA	117102	AGNILITLNNEVR;ALDKPLTEPQIR;AWSPSLNNLLQR;DAFGSGITVLR;DFALADR;EKYEEEVIER;FISHEVISGLAFLHK;FVELDEQQSEK;HLIIHR;HPNILQLHEAYVFDKK;LASQLVEFR;QAAEFTHLHR;RVVLAEATARPVEK;SDPFVANVTEADR;SDPPTFSRPK;TFLEQFK;TLLVNQESR;TPSDIPPAVEQHYAEAADFFR;VVLAEATARPVEK	1;1;1;1;1;1;1;1;1;1;1;1;1;1;1;1;1;1;1	19	20	0.1998	40864;38479;39486;23835;5306;35400;50687;50688;36916;4394;57240;19047;28645;46207;40500;23570;10940;18855;64892;38601	tr|W6UKP2|W6UKP2_ECHGR	STE20 serine:threonine protein kinase OS=Echinococcus granulosus OX=6210 GN=EgrG_001193000 PE=4 SV=1	7.10778e+06	107694
699_1	tr|A0A068WCX6|A0A068WCX6_ECHGR	3.03506	NA	12279.2	LAEMDNR	1	1	1	0.0654	7500	-	Expressed protein OS=Echinococcus granulosus OX=6210 GN=EgrG_001072800 PE=3 SV=1	1.12549e+06	225099
195_1	tr|A0A068WI53|A0A068WI53_ECHGR	34.2421	NA	29584.9	AIYHATYR;ASAGSYIASPHVHK;LGPGLYYVDNDGTR;LLSNMLYNYK;LTGDYFSSGSGSPHAYAILDGEHR;YDMTTQEAIDLGR;YQGGIIVSVDSR	1;1;1;1;1;1;1	7	8	0.3532	15430;40745;46232;31664;67119;44973;33681;33685	tr|W6U9V0|W6U9V0_ECHGR	Proteasome subunit beta type-8 OS=Echinococcus granulosus OX=6210 GN=EgrG_000590200 PE=4 SV=1	5.81464e+06	447280
1688_1	tr|A0A068WSP9|A0A068WSP9_ECHGR	3.41904	NA	18930.4	PLNNAYIK	1	1	1	0.046	12148	-	Marvel OS=Echinococcus granulosus OX=6210 GN=EgrG_001135300 PE=4 SV=1	4.63295e+06	926590
1548_1	tr|A0A068WM92|A0A068WM92_ECHGR	49.0311	NA	30601.9	GNKLDELFDK;LDELFDK;LDELFDKTEQFEADAQMFQSTAK;LMQLHSQVADVSMLMHQNINDLNER;RVQCLFTSDPSR;TEQFEADAQMFQSTAK;VLCEQSVGSVDYGK;VLEAQSGSEHCHQVDFGR;VLSEEMVQFSSQDR;VQCLFTSDPSR	1;1;1;1;1;1;1;1;1;1	10	28	0.4022	26693;26692;26751;9156;68733;68753;68893;70549;70555;70556;70557;70550;70558;42773;42774;54160;54193;54159;46273;46276;46270;59584;59603;59585;59586;59604;49483;34623	tr|W6VBD9|W6VBD9_ECHGR	Vesicle associated membrane protein OS=Echinococcus granulosus OX=6210 GN=EgrG_000494400 PE=4 SV=1	7.48689e+07	6.80627e+06
404_1	tr|W6V0S2|W6V0S2_ECHGR	5.25985	NA	43075.1	VSVLTDLLR	1	1	1	0.023	16457	tr|A0A068W9E3|A0A068W9E3_ECHGR	NAD-dependent deacetylase sirtuin-6 OS=Echinococcus granulosus OX=6210 GN=EGR_00437 PE=4 SV=1	8715.45	363.144
652_1	tr|A0A068WXM7|A0A068WXM7_ECHGR	23.7548	NA	25603.8	ASVKPSATNMLEMVYSLK;DLLHYHNHK;DYGQNLVLFGGVSR;KDLLHYHNHK;NLVEMAAK;WWEEVK	1;1;1;1;1;1	6	7	0.2557	57634;26585;45577;34343;34346;8953;8996	-	Cysteine rich secretory protein LCCL OS=Echinococcus granulosus OX=6210 GN=EgrG_001155900 PE=4 SV=1	5.70013e+06	475011
193_1	tr|W6UQL8|W6UQL8_ECHGR	5.0674	NA	24562.4	DLDGTVICGVR;TRPKPWIR	1;1	2	2	0.0892	28325;18435	tr|A0A068WEN9|A0A068WEN9_ECHGR	Splicing factor, arginine/serine-rich 7 OS=Echinococcus granulosus OX=6210 GN=EGR_02105 PE=4 SV=1	1.73184e+06	133218
191_1	tr|W6U6M0|W6U6M0_ECHGR	145.441	NA	59579.6	DWESDANLPNNGCTDLAYQLVTEHPDIHVLMGGGQR;EEISPQYWENLAR;ETLLIVTADHSHSFALVGQPSR;FDENYAK;FSTFFAPDK;FSTFFAPDKIK;GMLPIGYMTGPGAK;HTYEDWEFGTLCR;IKGEQTLDK;ITHASPSGCYGHVAHR;KEEISPQYWENLAR;KGMLPIGYMTGPGAK;LTDMWEQNQK;NFYPAGVQLPSEPNQK;NVILFLGDGMGVPTVSATR;NYVYADGPEK;QCSLYADEEK;QCSLYADEEKTESALTAAEK;QFPEWFSVAK;QQGNPSLYEMTMAALDILTK;QTTFSK;RLTDMWEQNQK;SPNGFFLFVEGAR;TAMIGVTGAVLVK;TESALTAAEK;TIHAVFK;TYDLETTVTDSASSATAYL…	1;1;1;1;1;1;1;1;1;1;1;1;1;1;1;1;1;1;1;1;1;1;1;1;1;1;1;1;1;1	30	78	0.6529	73862;73863;48956;65142;65144;65143;65141;9473;9524;9475;9525;18823;34080;34082;39112;51113;51112;17261;51986;51990;51987;51989;52355;52330;52326;52354;52353;52329;45388;33599;34565;34613;33648;33647;53049;53050;53023;53051;57099;57098;25133;25134;25136;25207;30603;29557;63020;63019;62771;30401;29344;30403;30400;30402;62456;62455;572;41924;42719;42721;41527;41581;41582;41580;31742;16688;16689;166…	-	Alkaline phosphatase OS=Echinococcus granulosus OX=6210 GN=EGR_08266 PE=3 SV=1	3.69513e+08	1.23171e+07
1608_1	tr|A0A068WCG4|A0A068WCG4_ECHGR	20.8546	NA	68435.6	APFASATVEELK;IHHEQFFVHPFIDLAHAPCPQSIDK;LLMAWFSSPTGANR;LSQYIK;RAQDNLVDEIGILK;SNAAPSVLSK	1;1;1;1;1;1	6	7	0.1328	31927;70817;70816;46636;2554;47697;14325	tr|W6UPB9|W6UPB9_ECHGR	Serine/threonine-protein kinase ULK3 OS=Echinococcus granulosus OX=6210 GN=EgrG_000854700 PE=4 SV=1	1.22059e+08	3.48739e+06
1377_1	tr|A0A068WN67|A0A068WN67_ECHGR	38.4159	NA	34983.7	AESSLPK;AGVGLNTIMVK;ASNTAGDHEDMPK;GSANRPTSGVVENETTR;INGIPCENVSHDQICQAIQK;ITTCGNLTYITGVYENTPAAR;SEGDVVVVK;SKSEGDVVVVK;TLLLSNGK;VENPEPSFPSVYELQTSLPAGK	1;1;1;1;1;1;1;1;1;1	10	15	0.4194	1536;21677;38064;52646;52648;64423;64276;64275;64299;12078;24576;7422;7424;65264;65265	-	Pdz domain containing protein OS=Echinococcus granulosus OX=6210 GN=EgrG_000105600 PE=4 SV=1	7.89813e+06	376101
406_1	tr|W6UKP8|W6UKP8_ECHGR	112.423	NA	107783	AADLLYAMCDR;ACNQLGQFLQHK;EDVQAYAAK;EMAEQFGSEIPK;ETIVEVLSQDSNYR;FINLFPELK;GLSVFISDIR;HQETIVNALK;KPESDGLSSSVK;LLCQPGQECQR;LLVSGETSDSIK;LTDCLDTILK;MQFELIHSK;QLLLSTYVK;QNAALCLLR;SGSAITAFASK;SPLNLDLRPAPTTIEPEK;STAFVNLALQCVANIGNR;STALVDLESEYIR;SVEYLALSK;VAGDYVSDEVWHR;VAILAEK;VGGYILGEFGNLIAGDAR;VVFSEICPTTGR;VVQIVVNR;YLALESLCLLATSEFSHEAVK	1;1;1;1;1;1;1;1;1;1;1;1;1;1;1;1;1;1;1;1;1;1;1;1;1;1	26	31	0.3165	33966;41697;15417;37684;49454;22904;21961;24975;30094;30093;38887;31062;27514;23635;19175;18772;17756;17673;58057;57123;57124;44169;16154;45886;45887;2165;53936;37697;37698;11798;65188	tr|A0A068WH48|A0A068WH48_ECHGR	AP-2 complex subunit alpha OS=Echinococcus granulosus OX=6210 GN=EGR_06448 PE=3 SV=1	1.4409e+07	257303
571_1	tr|A0A068WHH2|A0A068WHH2_ECHGR	365.577	NA	514307	AGQDLSNSIPSSK;AQNFASALGSIEGNIK;ARPYTQTDPQLK;ASDFQECQAAVQLWNR;ASVVAPQLAAVPGDLAEK;ATRPEINPQTSTGLER;AWEELENAESDFEEAIR;DKGLLQEQVR;DLTNPLLSK;DLVVWYK;DSLASSSSALEASR;EKDILLAK;ENQSLAAITYDWR;ESGESGNHGGTWSR;FGENVPGSENDQTCGPK;FSSQTVIQR;FSTGQANNNSR;GDFGSDYDHCVSLK;GQELLSILR;GSGELFYK;HYASTQIHEVINR;IDAIMEECSSVQTAPK;INWYEVGIR;IQWDTLNK;KAGAWTPELAAQIK;KHEALETEFVSIQQQVDDVISK;KWLPHEQTAGYNWAVLEGSR;LAESFLNVR;LAMLAVQEI…	1;1;1;1;1;1;1;1;1;1;1;1;1;1;1;1;1;1;1;1;1;1;1;1;1;1;1;1;1;1;1;1;1;1;1;1;1;1;1;1;1;1;1;1;1;1;1;1;1;1;1;1;1;1;1;1;1;1;1;1;1;1;1;1;1;1;1;1;1;1;1;1;1;1;1;1;1;1;1;1;1;1;1;1;1;1;1	87	105	0.2296	34250;48595;40329;56506;51640;52524;59211;27171;27168;15753;11600;38448;11966;47199;42512;54265;19232;27846;48092;17106;10222;47236;52748;24753;16526;43632;43631;67210;67209;64650;64649;18117;68542;61188;61187;38850;22326;10111;29749;27649;27650;46114;46113;15027;11694;17854;20065;72804;72805;9148;35843;41140;33512;19434;4217;41747;30799;34141;34135;10287;47941;12567;42447;42446;12932;17696;67420…	-	Spectrin alpha actinin OS=Echinococcus granulosus OX=6210 GN=EgrG_000486600 PE=3 SV=1	5.3714e+07	181466
400_1	tr|W6UIJ6|W6UIJ6_ECHGR	46.0633	NA	16847.3	AELSGEKIPGK;APCQGEMCVGK;EHEVSFCEILCDTTVTCGGACYK;EIPVGALEVDDGIFVAR;GFQLGLSWVPMR;NAIIAGIASDGEPLYICK;VHMGHSCAYIPYGGEEK;WVADSDGDVPK;YEVLVLR;YQTCYLPYGGK	1;1;1;1;1;1;1;1;1;1	10	17	0.8903	23414;23410;30239;69183;53342;53339;53340;39020;56071;56087;56807;56809;56808;57206;27337;9776;36787	-	DUF3421 domain-containing protein OS=Echinococcus granulosus OX=6210 GN=EGR_04177 PE=4 SV=1	6.2808e+07	6.2808e+06
1371_1	tr|A0A068X0Z8|A0A068X0Z8_ECHGR	13.0637	NA	28327.6	GMTGSLPANDWELVER;GSFGSECLEISSPLHPYQK;TSADVYANR	1;1;1	3	3	0.1679	52640;61205;15518	tr|W6U9J7|W6U9J7_ECHGR	Expressed conserved protein OS=Echinococcus granulosus OX=6210 GN=EgrG_001159100 PE=4 SV=1	2.82478e+06	353097
1649_1	tr|W6ULV8|W6ULV8_ECHGR	10.5197	NA	80049.8	ADVAFEVYHTILR;EIALLPLIASLR	1;1	2	3	0.0347	45964;45962;34608	tr|A0A068WQK3|A0A068WQK3_ECHGR	Signal recognition particle subunit SRP72 OS=Echinococcus granulosus OX=6210 GN=EGR_03049 PE=3 SV=1	0	0
896_1	tr|W6U2U0|W6U2U0_ECHGR	52.3044	NA	33715.2	ANLNAALPSLPPDSESPPPYSHPDIPFDK;APPANLCEAYLVEIAR;EAIATIIWVAPR;EFAQVCSTNANHSVNPK;FDPNKLK;GGGSTLPPTNDDDDFDALSAR;IRVEQIVR;KNELNVR;LGLITSTVECDPGLK;LGLITSTVECDPGLKEAIATIIWVAPR;LSYDCQELEVLK;TQFAIK	1;1;1;1;1;1;1;1;1;1;1;1	12	48	0.4983	71234;71236;71235;52967;52970;52996;52966;52969;52999;36275;36277;36276;56039;56036;56040;56043;56001;56042;56034;56033;56035;56062;56063;56038;56061;8270;60933;60932;60926;60927;60931;60929;60934;60925;60928;60930;60921;60922;60935;60920;16298;8767;48180;70500;70501;44207;44211;439	tr|A0A068WMD9|A0A068WMD9_ECHGR	IST1 homolog OS=Echinococcus granulosus OX=6210 GN=EGR_09731 PE=3 SV=1	1.56208e+08	1.2016e+07
61_1	tr|U6IWA4|U6IWA4_ECHGR	36.1433	NA	30799.2	EMTSEQFQEVVR;GIVGGITPITK;LITSCELPEGTILSPK;NLDEVNECHSFR;QAIAAIVYQPWR;QAIAAIVYQPWRDPK;VIEATQQVVAGMK;YELMDVIEGK	1;1;1;1;1;1;1;1	8	8	0.3248	43560;18580;52217;45315;40239;52153;38151;27799	-	Proteinase inhibitor I25 cystatin OS=Echinococcus granulosus OX=6210 GN=EGR_01530 PE=4 SV=1	3.06995e+06	204663
1603_1	tr|A0A068WFM8|A0A068WFM8_ECHGR	8.95742	NA	7994.46	TLFELVQYITQR;VKPINLSK	1;1	2	3	0.2985	44913;44914;10128	-	Guanine nucleotide binding protein OS=Echinococcus granulosus OX=6210 GN=EgrG_000674600 PE=4 SV=1	550266	110053
691_1	tr|U6J1G5|U6J1G5_ECHGR	70.757	NA	72142	ALDLQGLPWQR;ATVGVDFK;DGLVTIDELLK;DILYGQIQK;DSPANSVKPAAPAFISTR;EWVSMLEESCGDSFIPR;FCTGDFYYNAR;HALYLQGEFLDR;KCDGAILMYDVSSWASFVGVR;KYEAAYVEK;LDTDRDGLVTIDELLK;LKDALHEVQGK;SLNATTPGDDSVFGR;SYDTNDSGNFNR;TCFMYR;VMVIDGNVYTIELWDTAGQEK	1;1;1;1;1;1;1;1;1;1;1;1;1;1;1;1	16	16	0.3127	33890;6841;29024;20012;54098;59290;40119;42573;64897;21512;53767;30355;46089;38911;9047;65184	-	Ras and EF-hand domain-containing protein OS=Echinococcus granulosus OX=6210 GN=EGR_05057 PE=4 SV=1	9.57393e+06	239348
1542_1	tr|W6UW45|W6UW45_ECHGR	2.10054	NA	7057.87	NGIYRPPK	1	1	1	0.1356	12865	-	60S ribosomal protein L29 OS=Echinococcus granulosus OX=6210 GN=EGR_00110 PE=3 SV=1	0	0
67_1	tr|W6UD45|W6UD45_ECHGR	46.7833	NA	43127.5	DIIEATGDILSK;DLSDACELLQEK;FLEENRDK;FLGCTDLSELSETEK;IDEVNQK;IDGVTPVHSR;LKPDVAWLVDLLHAFNK;LLILQDLPGAR;NVYNFGELISHEILETLR;SFKDDWTQIR;VTLTWLQPR	1;1;1;1;1;1;1;1;1;1;1	11	13	0.3422	32555;40495;18248;51440;7329;20192;20191;57828;28616;61447;33800;33803;22391	-	26S proteasome non-ATPase regulatory subunit 13 OS=Echinococcus granulosus OX=6210 GN=EGR_06387 PE=3 SV=1	5.28084e+06	188601
808_1	tr|A0A068WGQ7|A0A068WGQ7_ECHGR	23.0894	NA	87453.6	EIGHPEGGFVPEK;GRPIYDLITPR;LLDIAAHLAR;LVDTYSGR;NLANHLVAVDR;SLNQPLR;STQIELSSK	1;1;1;1;1;1;1	7	10	0.0866	39258;34093;34090;21049;21050;10823;29372;29371;6383;15326	-	Macrophage-expressed gene 1 protein OS=Echinococcus granulosus OX=6210 GN=EGR_02534 PE=3 SV=1	2.72891e+07	620207
1540_1	sp|Q9U8G7|P29_ECHGR	93.8499	NA	27079.7	AAPQLSK;AEKNYYEACAK;AGELVNK;AGELVNKNEK;EFDGLSVQLLDLIR;IITATEEFVDINIASK;ITTTDKLGTALEQVASQSEK;KDESDFDR;KNFNSEVNTTFIEDLK;LDLDSDKTK;LGTALEQVASQSEK;MLTEASDVHQR;NFLNTTLSEAQK;NFNSEVNTTFIEDLK;NYYEACAK;TCKEFDGLSVQLLDLIR;TKLEEVR;TSDLIHEIDQMK;TSYPTR;VADAFQK;VHQESLTIFEK;WEAEVR	1;1;1;1;1;1;1;1;1;1;1;1;1;1;1;1;1;1;1;1;1;1	22	89	0.7815	736;735;36612;36611;1501;21662;21661;21660;21705;48559;48558;52373;52376;52378;52406;52375;52374;52407;60916;60917;16207;16208;55886;55880;55846;55885;55876;55916;55912;55877;55913;55882;55844;55878;55883;55914;55879;55884;55843;55881;55918;55964;55915;55889;55868;55845;55875;55865;17427;42530;42527;42532;42525;42531;33264;33262;34175;34176;33263;37709;37708;37747;37702;37741;37746;37745;37707;37…	tr|A0A068WMU2|A0A068WMU2_ECHGR	Hydatid disease diagnostic antigen P-29 OS=Echinococcus granulosus OX=6210 PE=1 SV=1 >tr|W6V2P2|W6V2P2_ECHGR Hydatid disease diagnostic antigen P-29 OS=Echinococcus granulosus OX=6210 GN=P29 PE=2 SV=1	5.3063e+08	2.79279e+07
693_1	tr|A0A068X3I9|A0A068X3I9_ECHGR	77.3801	NA	48428.9	AICQCYQQK;AIENDTSGDYK;AIENDTSGDYKR;ALMQLVLGR;CEIDLQDVK;DKALMQLVLGR;DTMVSIVR;EEGTPVSVNCAAADAEALYK;ETSGDYRDTMVSIVR;GLGTDEGCIIAVLSK;ILVALLQAQR;LGTEEAVFTR;LLIQALVPYSNAIVGEIPK;RLGTEEAVFTR;SDTSGDFEK;SLETAIK;SLETAIKK;YAEDKNALLATWFYESMVGIGTR	1;1;1;1;1;1;1;1;1;1;1;1;1;1;1;1;1;1	18	31	0.3792	27914;28822;28879;28877;37913;37911;15758;22790;30714;30713;11457;60324;51444;45922;45921;23186;23007;59254;59253;59252;59227;59228;59255;32800;32798;14944;3028;9681;9682;68143;68142	-	Annexin OS=Echinococcus granulosus OX=6210 GN=EgrG_000330300 PE=3 SV=1	6.78963e+07	3.39482e+06
579_1	tr|W6U962|W6U962_ECHGR	3.03506	NA	51706.8	VVIVASGVHHR	1	1	1	0.0234	26344	tr|A0A068WSW4|A0A068WSW4_ECHGR	Galactokinase OS=Echinococcus granulosus OX=6210 GN=EGR_07631 PE=4 SV=1	0	0
894_1	tr|U6IXS1|U6IXS1_ECHGR	39.3211	NA	44400.7	DGLIINDLYR;DIKPDNFLMGIGR;FDEAPDYLYLR;GSLPWQGLR;ILNGGIGIPR;KIGCGSFGVIYLGVNQK;LYIIDYGLAK;QLVYESK;SGEEVAVK;YASINAHLGIEQSR	1;1;1;1;1;1;1;1;1;1	10	11	0.2817	27516;43245;43246;39570;16330;16199;54388;26014;8478;5920;46951	-	Casein kinase I alpha OS=Echinococcus granulosus OX=6210 GN=EGR_01275 PE=3 SV=1	6.48444e+06	281932
695_1	tr|A0A068WRB1|A0A068WRB1_ECHGR	45.5412	NA	33435.5	ALDQEVGAR;DSSVSYASASLVIK;FSYTYYNR;FVNLALK;GMELIENLDASGFNK;HPISVLLQAVR;IFVLGPSHNLYLESCAIPIADYFETPFYNLR;KNLLSTGK;NSWYSGNSDELDK;QLSNWLSK;SYGEIWESIR;YLADYGNTICGR	1;1;1;1;1;1;1;1;1;1;1;1	12	13	0.4949	13537;40854;22346;5166;49028;30044;30045;73245;8219;45049;13538;30455;39609	-	Protein memo1 OS=Echinococcus granulosus OX=6210 GN=EGR_01893 PE=3 SV=1	1.8016e+07	1.05976e+06
1546_1	tr|U6J6D8|U6J6D8_ECHGR	9.07087	NA	35916	GVNDLQTQADR;SVQHCIVTSLSK	1;1	2	2	0.068	29050;37308	-	3'(2'),5'-bisphosphate nucleotidase OS=Echinococcus granulosus OX=6210 GN=EGR_04418 PE=3 SV=1	31854.8	1676.57
1544_1	tr|A0A068WD13|A0A068WD13_ECHGR	12.5941	NA	38929	LSADDLLSCCR;NVCQEEYK;VYSVHSNEDAIK	1;1;1	3	4	0.0883	34615;19421;37455;37457	tr|W6UUL0|W6UUL0_ECHGR	Cathepsin b OS=Echinococcus granulosus OX=6210 GN=EgrG_000790200 PE=3 SV=1	3.51774e+06	175887
697_1	tr|W6V1I8|W6V1I8_ECHGR	5.25985	NA	12565.2	LDAITDAIEK	1	1	1	0.0877	20746	-	Selenoprotein W OS=Echinococcus granulosus OX=6210 GN=EGR_00071 PE=4 SV=1	4.93703e+06	822839
298_1	tr|W6V5C9|W6V5C9_ECHGR	47.9525	NA	54739.8	DVFFYQADDAHYIPR;GAFLEQFR;KDVFFYQADDAHYIPR;LENPTFAQINQLVSK;LQEEIFDIIDR;LTLNADCVVVLDNTALHR;QVVQHLIEEHLAATK;RSPYVQTAHR;SDYVQWGAQK;VINTILSSPYAR;VMSVSTATLR	1;1;1;1;1;1;1;1;1;1;1	11	12	0.2561	54785;14019;57933;50820;50818;39015;58968;50751;28959;26858;35980;19161	tr|A0A068WXL7|A0A068WXL7_ECHGR	Tubulin gamma chain OS=Echinococcus granulosus OX=6210 GN=EGR_03754 PE=3 SV=1	4.58628e+06	158147
1641_1	tr|W6URV4|W6URV4_ECHGR	32.7465	NA	156812	AASTSYLAR;HSVIVGGK;IDESIQAIDDLLDFYTR;LETYSSQLEADVR;LLGIAVR;LLQNQGDFLVR;RPTFANLVVTLTELK;VSNALWHTVQYSK	1;1;1;1;1;1;1;1	8	9	0.0648	12526;4764;59027;44886;2056;34217;50824;45918;45919	tr|A0A068WS98|A0A068WS98_ECHGR	Non-specific protein-tyrosine kinase OS=Echinococcus granulosus OX=6210 GN=EGR_08994 PE=4 SV=1	4.72498e+06	62999.7
668_1	tr|W6UTP0|W6UTP0_ECHGR	13.3917	NA	93320.1	AAGISETSTSSER;LNVIVSK;SEGGAGLGSAALTAQR	1;1;1	3	3	0.0432	33793;3547;41792	tr|A0A068WM05|A0A068WM05_ECHGR	LMBR1 domain-containing protein OS=Echinococcus granulosus OX=6210 GN=EGR_01134 PE=4 SV=1	2.32795e+06	61261.7
540_1	tr|W6UDI1|W6UDI1_ECHGR	44.823	NA	40843.4	APVDALWNSDISSTK;GNAIVQSTPGGK;KATQWSIDK;KQLQIYITDLK;MDLEQIDTGTR;MISMSWR;NVNNWHWIEK;QGSSDLILK;TEGVCYLR;WIVEER;YAIFDGNVSGSFIDLEPNK	1;1;1;1;1;1;1;1;1;1;1	11	12	0.3259	48198;23400;19947;37562;37561;32751;10813;36260;13666;15576;6601;60189	-	Activator of heat shock protein ATPase OS=Echinococcus granulosus OX=6210 GN=EGR_06055 PE=3 SV=1	4.88042e+06	221837
1643_1	tr|A0A068WH68|A0A068WH68_ECHGR	5.25985	NA	142864	VSANSVVDSGR	1	1	1	0.0083	20876	tr|W6UPC7|W6UPC7_ECHGR	Immunoglobulin OS=Echinococcus granulosus OX=6210 GN=EgrG_000967100 PE=4 SV=1	0	0
892_1	tr|U6J321|U6J321_ECHGR	41.7718	NA	47259.7	EFDENNTPWEVNICYIK;EVSGTYPSTR;GSWWVYGPPVQLLAYK;NLGDIYHQCLQILAGK;TKGPGYANHLLSVLR;TKTELVVVK;VETLDSVVCYGQEAEK;VLMLITNEDR;VPEDLPETR;VQEPQQLEK	1;1;1;1;1;1;1;1;1;1	10	13	0.3009	61872;61871;21242;54982;54467;54466;48727;48728;16507;54048;28287;18550;21385	-	Expressed conserved protein OS=Echinococcus granulosus OX=6210 GN=EGR_02048 PE=4 SV=1	1.09991e+07	439962
664_1	tr|W6V2B5|W6V2B5_ECHGR	16.4429	NA	21766.7	DCISGWGAR;FGVGYQTIATNYPK;VEQLGPHLFVGFPGLVTDKETVCQR;VYLIEK	1;1;1;1	4	5	0.2812	16723;46943;69906;69907;3184	tr|A0A068WDQ4|A0A068WDQ4_ECHGR	Proteasome subunit beta type-3 OS=Echinococcus granulosus OX=6210 GN=EGR_05037 PE=4 SV=1	2.85247e+06	285247
1267_1	tr|W6UCR6|W6UCR6_ECHGR	50.9293	NA	36866.7	ENKQDASGLLGQK;EWMNLLCQHAYCERPDVILVGNK;GRDEEDYDYLIK;LAQELQVPYIETSALSGK;LLALGDSNVGK;LYLQLWDTAGQER;NSNGGIHLENAK;QDASGLLGQK;RIEESVTK;SLCTVFLR;VISTSDAQR	1;1;1;1;1;1;1;1;1;1;1	11	21	0.3848	38857;69996;45107;45106;57100;57094;57154;20553;47926;47925;31404;31464;31406;31460;31403;31408;16481;15673;13713;15482;14491	-	Ras-related protein Rab-27A OS=Echinococcus granulosus OX=6210 GN=EGR_06615 PE=4 SV=1	4.93737e+07	2.35113e+06
542_1	tr|A0A068WXK5|A0A068WXK5_ECHGR	6.08663	NA	94925.9	TFADFFK;VLSLTFK	1;1	2	2	0.0166	8936;5350	tr|W6U2T1|W6U2T1_ECHGR	Dipeptidyl peptidase 9 OS=Echinococcus granulosus OX=6210 GN=EgrG_000362100 PE=4 SV=1	78072.8	1774.38
1645_1	tr|A0A068WPG8|A0A068WPG8_ECHGR	91.288	NA	91570.5	CDADVGNIQK;DFKEPQEQDAQEFLLFLLNR;FSPPLSVNVPNDICFDSLR;GSIETGHITAYCK;IFEGTLQTHLIYPQHK;KCDADVGNIQK;LAGSNNLEDSYFTIEK;LLALQSLLVFCGNR;LLVVWSSPPIDPLPTFK;LVVAIFR;MQLLLVHVEEHK;NDYASELK;NLDLSFMFDQSK;QHTTVLLNTR;QVLDSASSSTVESR;SLISGQWWHYNDLK;STGFGDWFLESSGR;TPTGSMLTSEVYR;VSPDQVVQPGAYILFYK;WLSTENGDRPR	1;1;1;1;1;1;1;1;1;1;1;1;1;1;1;1;1;1;1;1	20	26	0.3143	22779;66447;61987;41326;41323;56571;56570;30963;53357;48214;56193;5900;43257;43256;12512;41735;26953;25791;42772;42770;51911;51908;46446;41575;56569;35834	tr|W6UII9|W6UII9_ECHGR	Ubiquitin carboxyl terminal hydrolase 4 OS=Echinococcus granulosus OX=6210 GN=EgrG_000065800 PE=4 SV=1	1.82426e+07	350820
1647_1	tr|U6J7W8|U6J7W8_ECHGR	3.46004	NA	7814.96	LLQSLDHDK	1	1	1	0.1304	19393	-	Calcium-binding protein OS=Echinococcus granulosus OX=6210 GN=EGR_01020 PE=4 SV=1	268278	89426
63_1	tr|W6UIR6|W6UIR6_ECHGR	8.83272	NA	16392.9	LNHETVTIELK;YFILPDTLPLDTLLIDEGPTKR	1;1	2	3	0.2292	33892;33893;67054	tr|A0A068WKE6|A0A068WKE6_ECHGR	Small nuclear ribonucleoprotein Sm D1 OS=Echinococcus granulosus OX=6210 GN=EGR_03685 PE=3 SV=1	0	0
544_1	tr|W6ULG2|W6ULG2_ECHGR	5.38916	NA	54943	HNYYDLR;NSVLATKPK	1;1	2	2	0.0329	14687;13505	tr|A0A068WDK8|A0A068WDK8_ECHGR	Uncharacterized protein OS=Echinococcus granulosus OX=6210 GN=EGR_03224 PE=4 SV=1	0	0
890_1	tr|A0A068WG80|A0A068WG80_ECHGR	12.9924	NA	73238.9	AAESPQLRPR;DDLNEVR;FGADVNAR;GITQEDIDEKR	1;1;1;1	4	4	0.0541	23169;8165;7567;34248	tr|W6UP99|W6UP99_ECHGR	Protein phosphatase 1 regulatory inhibitor OS=Echinococcus granulosus OX=6210 GN=EgrG_000440300 PE=4 SV=1	3.89784e+07	1.55914e+06
666_1	tr|U6JN38|U6JN38_ECHGR	6.1144	NA	10421.6	KIEVSQHATYNCNFCGK;KVGIVGK	1;1	2	2	0.25	59588;109	-	60S ribosomal protein L37a OS=Echinococcus granulosus OX=6210 GN=EGR_09271 PE=3 SV=1	245506	40917.6
68_1	tr|W6U4I7|W6U4I7_ECHGR	90.4601	NA	74485.5	ASQEIPTPIR;CLDALEELHNIGYLHR;EFFSPSATFIR;ESGLPPIIATTWVHELK;FLSVITLGR;GELPWQR;GFGSTGELK;GSVPDNYVVAVK;INYIVMTLQGK;KFSEDGLESADSGNSSGHSER;KNFCDLITCGK;MEWNDPYDWQK;QFVQNIK;QGANTNLR;RFDTEEAEGGTTALGGK;RVIEVWLLENR;SFSHSTSLR;SLNYFLKPNYR;STAAVCEDATTNK;VIEVWLLENR;YASINAHEYR;YVNFNNPHK	1;1;1;1;1;1;1;1;1;1;1;1;1;1;1;1;1;1;1;1;1;1	22	29	0.3664	22247;57259;57260;34124;55632;55635;15996;9429;9958;30996;32879;62266;62267;37132;44919;9029;8827;51699;40867;16735;40183;40184;40182;37777;32333;29461;29460;23629;23627	tr|A0A068WUY5|A0A068WUY5_ECHGR	Tau-tubulin kinase OS=Echinococcus granulosus OX=6210 GN=EGR_09115 PE=4 SV=1	2.09253e+07	475576
1464_1	tr|U6J9Q8|U6J9Q8_ECHGR	18.0456	NA	26574.2	AEVNWQIAETVAGYE;DTMTVLFYR;SQFNPLWNSYIVGGVQK;VNECTALACSGDIADFQYLVK	1;1;1;1	4	4	0.2541	50162;24485;56878;65063	-	Proteasome subunit beta OS=Echinococcus granulosus OX=6210 GN=EGR_03528 PE=3 SV=1	2.25477e+06	173444
1466_1	tr|U6JPQ6|U6JPQ6_ECHGR	35.2688	NA	49063.7	ELSLLCNEIFR;FFIFAR;GVNRPANNGVGR;KAPEIESKPEVNK;KSVVGSAPR;LVILVVPDK;LVILVVPDKSEGNR;TEAVIEGR;VPIKPQDEVDIQGAR	1;1;1;1;1;1;1;1;1	9	12	0.2005	39163;4945;28763;42942;42943;10248;15496;15497;46206;46205;8890;49802	-	Expressed protein OS=Echinococcus granulosus OX=6210 GN=EGR_07941 PE=4 SV=1	1.01734e+07	363336
910_1	tr|A0A068WT58|A0A068WT58_ECHGR	101.733	NA	66560.3	FSGVALGEACTIVLR;GATNSILSEAER;IADLEIAEK;IADLEIAEKEK;IGVNQPK;IINHGCNVFINR;ILLAGETFEVTNDGATILK;LALVTGGEIVSTFDSPETAR;LGGTLSDSYLDEGFLLDKK;LGHCDLIEETTIGEDR;LHPQTIVSGWR;LKGSGNLDAIQVIQK;MAIAMEAFATALR;QLIYNYPEQLFADAHVMAIEHADFEGVER;QMIISASEAAEMIIR;RLPAIIADNGGYDSAELVSQLR;SLHDALCVLQQTVK;SLHDALCVLQQTVKDPR;TVSGGGAMEMLMAEAVAK;VALDALEK;VQDNEVGDGTTSVTVLASELLR	1;1;1;1;1;1;1;1;1;1;1;1;1;1;1;1;1;1;1;1;1	21	37	0.4902	47930;30982;31047;31046;15789;31676;31674;2701;42328;42329;42326;58447;58462;58446;59729;59728;59904;59903;54810;54809;33694;33693;47699;39265;39264;72534;49735;49736;64868;64867;48392;57847;57846;52092;8070;64110;64111	tr|W6V5H0|W6V5H0_ECHGR	CCT-beta OS=Echinococcus granulosus OX=6210 GN=EGR_03598 PE=3 SV=1	4.75548e+07	1.32097e+06
1568_1	tr|W6UGH6|W6UGH6_ECHGR	57.8696	NA	98104.9	AAPSITISSTK;ALLELAK;AVASNSQNTPVSLR;GVGHVIADAQK;HLHHQQQPLDEATDR;LAEVGLANLHR;LALLEVLDR;LKELINGNQDIR;LVNICLTALQR;NFDEVALGYLIR;TSTVVNTAAAAIR;TYLLENNVELVNPLIK;YVPIKDSAEAQIK	1;1;1;1;1;1;1;1;1;1;1;1;1	13	15	0.1736	19893;2833;41749;21155;21154;53986;27583;17775;40149;34092;39975;32566;55158;42586;42587	tr|A0A068WDV1|A0A068WDV1_ECHGR	Uncharacterized protein OS=Echinococcus granulosus OX=6210 GN=EGR_07919 PE=3 SV=1	3.55715e+06	74107.4
1549_1	tr|A0A068WEY5|A0A068WEY5_ECHGR	27.0972	NA	67746.1	DITYGVFDEYTIATILR;DKQNVSTEWNFDTLGR;ELFSHSYIK;GLAYIHEGGLVHR;GSLLDVIK;NSADVLAR;SIGQGATSVVHEALCKPLNR;TAYEIVK	1;1;1;1;1;1;1;1	8	9	0.1593	58030;56200;23075;40589;40590;7308;7391;61229;6184	-	Non-specific serine/threonine protein kinase OS=Echinococcus granulosus OX=6210 GN=EGR_07184 PE=4 SV=1	4.04246e+06	149721
378_1	tr|A0A068WR11|A0A068WR11_ECHGR	2.1562	NA	45239.4	IWDDR	1	1	1	0.012	283	tr|W6U1Z2|W6U1Z2_ECHGR	WD repeat containing protein 55 OS=Echinococcus granulosus OX=6210 GN=EgrG_000344200 PE=4 SV=1	1.01767e+06	59862.7
1307_1	tr|W6U5W8|W6U5W8_ECHGR	94.2007	NA	106751	AGDTSFFSR;AGTGPSRPSIGPQR;ALIHLVNSFSER;DIQSAIASER;DTLPTLR;ESEIGGNGTPPR;FFLGHPAYR;FINAIDGHSGAISVDSLSGGAEINR;FPLDLIEIQIDEK;FVLPLEGLK;GISNIPINLR;GWLTLLNGK;HFTNFEDVR;ITMYLLIDDVKK;IYSPQVLNLTLIDLPGLTK;KDIQSAIASER;KEIEAETDR;KFVLPLEGLK;LLAPSLSCVDR;LQSQMLSLEK;LQSQMLSLEKDVEAFK;RPLILQLINNNIEYAEFLHLK;SSVLENFVGR;TLDLAADNVDAR;TQLDLVPK	1;1;1;1;1;1;1;1;1;1;1;1;1;1;1;1;1;1;1;1;1;1;1;1;1	25	27	0.2771	15047;38464;38467;38740;20799;5725;28938;22019;66687;47363;16459;21284;15846;25708;42084;60404;60403;29135;20873;24393;29873;26601;55020;67318;22022;32478;11023	tr|A0A068WP58|A0A068WP58_ECHGR	Dynamin GTPase OS=Echinococcus granulosus OX=6210 GN=EGR_08549 PE=3 SV=1	1.71799e+07	296206
918_1	tr|W6U3C7|W6U3C7_ECHGR	10.5197	NA	36067.5	AFICHFDMHWLAIR;LGHQWFDLNSLHSQPR	1;1	2	2	0.0946	53791;56819	tr|A0A068WS04|A0A068WS04_ECHGR	Ubiquitinyl hydrolase 1 OS=Echinococcus granulosus OX=6210 GN=EGR_09510 PE=4 SV=1	113779	7585.29
916_1	tr|A0A068WBC0|A0A068WBC0_ECHGR	18.0456	NA	92782.6	NTEEYCSHALR;SLQPDDVTFLAR;SSNHLFLDLPK;WTQVAQSIAR	1;1;1;1	4	4	0.0537	38395;37484;32326;25397	-	Methionine--tRNA ligase, cytoplasmic OS=Echinococcus granulosus OX=6210 GN=EgrG_000972000 PE=3 SV=1	1.69082e+07	469673
198_1	tr|A0A068X350|A0A068X350_ECHGR	7.21089	NA	43108.1	ILITGALPR;LYSLNVLFTGLPEDHHSR	1;1	2	2	0.0699	13304;60397	-	Dendritic cell protein OS=Echinococcus granulosus OX=6210 GN=EgrG_000914900 PE=3 SV=1	793957	37807.5
953_1	tr|A0A068WE74|A0A068WE74_ECHGR	5.25985	NA	77505.4	HLIVDQTIEK	1	1	1	0.0141	27768	tr|W6UQ35|W6UQ35_ECHGR	Protein numb OS=Echinococcus granulosus OX=6210 GN=EgrG_000836200 PE=4 SV=1	0	0
655_1	tr|A0A068WG72|A0A068WG72_ECHGR	49.634	NA	62053	CFDQVTFK;EIVAPTGGK;GTHAIPFAVR;HGSDTEVQVNSFK;IPAEVNPTITYTR;ITIYTDNK;KAPGIELLDR;KPESQAQLITVANQLR;NPTYSAGYNSGVK;QAVCMLELK;VHLDVR;VPEDTESSIEAGEYR	1;1;1;1;1;1;1;1;1;1;1;1	12	16	0.2338	17881;8713;19402;19403;41912;41910;41918;43196;14023;22261;22262;53262;37228;20946;1895;50207	-	Expressed conserved protein OS=Echinococcus granulosus OX=6210 GN=EGR_00739 PE=4 SV=1	1.00309e+07	371515
1506_1	tr|U6JJX4|U6JJX4_ECHGR	12.1133	NA	33225.7	ASSLIQLK;ITGPEDSGPK;VDVDTCSECVANFGVVQIPTFVFLR	1;1;1	3	3	0.1424	8149;15721;70182	-	Thioredoxin protein 1 OS=Echinococcus granulosus OX=6210 GN=EGR_08045 PE=4 SV=1	1.26228e+06	90162.6
196_1	tr|U6J1C5|U6J1C5_ECHGR	2.87199	NA	10206.2	DIAAYIK;FNIEKDIAAYIK;HSPTWHCIVGR	0;0;1	1	2	0.2584	4622;4623;40753;40752;36794;36796	-	Dynein light chain OS=Echinococcus granulosus OX=6210 GN=EGR_03187 PE=3 SV=1	1.2728e+06	318201
196_2	tr|A0A068WE66|A0A068WE66_ECHGR	8.83272	NA	12595.1	AVDCAQDAMNK;LYSPTWHCIVGR;NADMAEDMQQR;NFGSYVTHETK	1;0;1;0	2	2	0.4091	29387;43842;43840;43841;34554;33081;33029;33027;33026;33080;33082;33023	tr|W6U526|W6U526_ECHGR	Dynein light chain OS=Echinococcus granulosus OX=6210 GN=EGR_09469 PE=3 SV=1	278576	39796.6
196_3	tr|A0A068WAL2|A0A068WAL2_ECHGR	11.8507	NA	10535.1	AVDCAQDAMNR;NFGSYVTHETK;NVDMAEEMQER;VYGPTWHCIVGR	1;0;1;1	3	4	0.4891	31224;33081;33029;33027;33026;33080;33082;33023;36894;41742;41741	-	Dynein light chain OS=Echinococcus granulosus OX=6210 GN=EgrG_000940800 PE=3 SV=1	1.15279e+06	164685
196_4	tr|U6J496|U6J496_ECHGR	8.4339	NA	10467.2	DIAAYIK;FNIEKDIAAYIK;HSPTWHCVVGR;NFGSYVTHETK;NVDMSEEMQQDAIDVATHAFEK	0;0;1;0;1	2	3	0.6154	4622;4623;40753;40752;36036;36035;33081;33029;33027;33026;33080;33082;33023;66790	-	Dynein light chain OS=Echinococcus granulosus OX=6210 GN=EGR_07359 PE=3 SV=1	3.79364e+06	632273
196_5	tr|U6IY96|U6IY96_ECHGR	12.4366	NA	10511.1	DAMNQFTIEK;EFDKLYSPTWHCIVGR;LYSPTWHCIVGR;NADMSDEMQQR;NFGSYVTHETK	1;1;0;1;0	3	4	0.5217	27789;27849;58499;43842;43840;43841;35451;33081;33029;33027;33026;33080;33082;33023	-	Dynein light chain OS=Echinococcus granulosus OX=6210 GN=EGR_09473 PE=3 SV=1	4.55163e+06	568953
196_6	tr|A0A068W9L2|A0A068W9L2_ECHGR	24.8504	NA	22281.8	AVDCAQDAMEK;DIAAYIK;FNIEKDIAAHIK;LFNPTWHCIVGR;NADMSEEMQQK;NFGSYVTHETK;TYTPTWHCIVGR	1;0;1;1;1;0;1	5	18	0.3938	30301;30299;31323;4622;4623;39428;39427;39425;44371;44372;44370;44373;44410;35556;34726;34672;34671;34724;33081;33029;33027;33026;33080;33082;33023;43935;43938	-	Dynein light chain OS=Echinococcus granulosus OX=6210 GN=EgrG_000941000 PE=3 SV=1	3.59041e+07	2.76186e+06
914_1	tr|W6UR05|W6UR05_ECHGR	15.7795	NA	54100.5	EDHDFIDESDQPSAQGSQIK;FFCPIATTMK;SAKEDHDFIDESDQPSAQGSQIK	1;1;1	3	4	0.0661	63053;28992;67063;67061	-	Amino acid transporter OS=Echinococcus granulosus OX=6210 GN=EGR_01271 PE=3 SV=1	2.8971e+07	1.9314e+06
1148_1	tr|U6J7X5|U6J7X5_ECHGR	6.04313	NA	26301.9	INSSAFSSSR;LPDEVPK	1;1	2	2	0.0705	18543;4797	-	Expressed conserved protein OS=Echinococcus granulosus OX=6210 GN=EGR_01858 PE=4 SV=1	2.8204e+06	402914
1460_1	tr|W6U842|W6U842_ECHGR	5.25985	NA	16770.2	APHDLQVGEGGGDTEVDSR	1	1	1	0.1275	56911	tr|A0A068WUK9|A0A068WUK9_ECHGR	Uncharacterized protein OS=Echinococcus granulosus OX=6210 GN=EGR_08643 PE=4 SV=1	1.48881e+06	248135
1504_1	tr|A0A068WGY1|A0A068WGY1_ECHGR	2.01959	NA	32292.8	ILGEILK	1	1	1	0.0249	4223	tr|W6UPY2|W6UPY2_ECHGR	Calbindin 32 OS=Echinococcus granulosus OX=6210 GN=EgrG_000463600 PE=4 SV=1	6.485e+06	381471
657_1	tr|W6ULG9|W6ULG9_ECHGR	5.25985	NA	57549.5	VGNLSENAEITR	1	1	1	0.0223	34190	-	Far upstream element-binding protein 2 OS=Echinococcus granulosus OX=6210 GN=EGR_02828 PE=4 SV=1	374009	14385
912_1	tr|W6UVV4|W6UVV4_ECHGR	9.07087	NA	33631.2	ATIELVGTAFGIK;VSDDLFCLR	1;1	2	2	0.0743	35233;23135	-	Lysosomal acid phosphatase OS=Echinococcus granulosus OX=6210 GN=EGR_02669 PE=4 SV=1	374515	17834.1
194_1	tr|A0A068WAT4|A0A068WAT4_ECHGR	2.89329	NA	10786.4	TAILLWK	1	1	1	0.0769	7312	-	Dynein light chain OS=Echinococcus granulosus OX=6210 GN=EgrG_000947200 PE=3 SV=1	595628	148907
760_1	tr|W6USX8|W6USX8_ECHGR	83.6767	NA	68250.1	ADGCVELFVVSEAGR;AYEQSVK;GDIFVTGGSDGK;GGFIVYPNKK;GGIYGLDFSPSGAR;HFATGGLDCTIMVFSPTASSK;HVIIGAHPK;IAVGGAGGEK;LVTGSEDFTACYFEGPPFK;LWSAEKPYDLLYEYAFEDK;LYPAVPYVER;NAHPGSLITALVWK;PLSFDK;SAIHGVVTCGDR;VINAEIGTEVGEVVGMSK;VINSLDFKPTRPFR;VLSAGVDDR;VTCVAWAPDGR;VVFSSLSNR	1;1;1;1;1;1;1;1;1;1;1;1;1;1;1;1;1;1;1	19	23	0.3794	48322;6215;24943;23029;39297;62778;14234;8061;61774;65165;28470;44717;44718;387;32360;32359;54179;54180;50456;50457;12063;29928;16111	tr|A0A068WAV5|A0A068WAV5_ECHGR	Actin-interacting protein OS=Echinococcus granulosus OX=6210 GN=EGR_00962 PE=4 SV=1	2.64373e+07	695720
651_1	tr|A0A068WSP7|A0A068WSP7_ECHGR	57.8841	NA	61088	AGEYVEVLNDSLNWK;DFLAESDQEISLK;FSVILLSR;GGPSDDNVSVSGADFK;KVISPLFPESAIR;LASGPEVR;LIQNSLIEPELSLWR;LQGYVTEPNPPLLTHK;NEFSENGNEDLTSQQLK;QLTITPVNLLLR;QPIDFIR;SHSEYLQYLR;VISPLFPESAIR	1;1;1;1;1;1;1;1;1;1;1;1;1	13	17	0.2773	51655;44126;12264;46667;42347;42348;6435;53634;53633;53524;57270;38487;37606;9612;33807;33802;35708	tr|W6UFX7|W6UFX7_ECHGR	Epidermal growth factor receptor kinase OS=Echinococcus granulosus OX=6210 GN=EgrG_000099700 PE=3 SV=1	1.30035e+07	433450
1502_1	tr|W6UCZ3|W6UCZ3_ECHGR	17.8851	NA	120902	AQISFLNLR;NVVLSSYTGGK;SPLALIVEPSR;VGWSTALACHDIGTDTESFGFGGTGK;VTLIIGGTSAR	1;1;1;1;1	5	5	0.0622	18991;23155;26899;68522;20679	tr|A0A068WTU5|A0A068WTU5_ECHGR	ATP-dependent RNA helicase DDX1 OS=Echinococcus granulosus OX=6210 GN=EGR_06524 PE=3 SV=1	1.05722e+06	15322.1
1492_1	tr|U6JQW5|U6JQW5_ECHGR	2.65351	NA	107981	LYPDIAK	1	1	1	0.0071	5984	-	GAS2-like protein OS=Echinococcus granulosus OX=6210 GN=EGR_06955 PE=4 SV=1	4.62652e+06	77108.6
235_1	tr|W6V2P4|W6V2P4_ECHGR	2.20658	NA	195367	LAVQLQAAAR	1	1	1	0.0058	17770	tr|A0A068WTY5|A0A068WTY5_ECHGR	Abnormal spindle-like microcephaly-associated protein OS=Echinococcus granulosus OX=6210 GN=EGR_04944 PE=4 SV=1	0	0
1425_1	tr|W6US13|W6US13_ECHGR	136.125	NA	108478	DVLVLGATNIPWCLDSAIR;EAVILPIK;EAVILPIKFPHLFTGK;EMDWTQIK;EMDWTQIKGDR;FHNQLSEAIVMEKPNVR;FPHLFTGK;GPSPADPSQIVDDLWTPCSPGDPGAK;IKTEFLVQMQGVGTNNK;IYIPLPEAPAR;KLADMTDGYSGADIAICVR;KVQTATHFK;KYLESNTGEEAAAEATTER;LADMTDGYSGADIAICVR;LFDPIVCMDDMIQAVK;MHLGTTPHELTDADFK;MHLGTTPHELTDADFKK;NLFELAR;NYEEALR;NYPGAAAQIR;QHRPSIVFIDEVDSLCGSR;RTPWQGILLYGPPGTGK;SKPTVNEADLQK;STFFSISSSDLVSK;TEFLVQMQGVGTNNK;TPWQGILLYGPPGTGK;V…	1;1;1;1;1;1;1;1;1;1;1;1;1;1;1;1;1;1;1;1;1;1;1;1;1;1;1;1;1	29	51	0.3065	60755;9312;53598;53596;53597;53595;18231;38357;58611;58612;12930;68432;68431;56121;30492;30493;59590;18860;18859;59880;59879;56626;55745;53670;53671;56961;56959;56960;56956;8306;9892;9941;18911;62613;62303;62304;54425;54424;35758;35800;35797;35759;44613;44612;49848;50320;12072;27349;56975;56993;56976	-	Vesicle-fusing ATPase OS=Echinococcus granulosus OX=6210 GN=EGR_01166 PE=4 SV=1	1.39722e+08	2.18316e+06
1317_1	tr|W6VC22|W6VC22_ECHGR	28.4233	NA	24042.1	DNGVHDFIETSAK;ELSKPDLAVVLVGNK;GAAGALVVYDISCR;LGENIQEAFYAAAR;VADWISSVR;VIQVGGESLK	1;1;1;1;1;1	6	8	0.3456	41180;41181;47655;47656;42069;46756;17312;17154	tr|A0A068WFM6|A0A068WFM6_ECHGR	Ras-related protein Rab-4B OS=Echinococcus granulosus OX=6210 GN=EGR_00953 PE=4 SV=1	1.32503e+07	779430
271_1	tr|W6UNJ9|W6UNJ9_ECHGR	11.0461	NA	119761	SLTTLSVHTLPR;SSPQDTDSSAAVVR;VLLSSVEELLER	1;1;1	3	3	0.0351	35489;40416;38816	tr|A0A068WJM9|A0A068WJM9_ECHGR	Conserved oligomeric Golgi complex subunit 1 OS=Echinococcus granulosus OX=6210 GN=EGR_02019 PE=3 SV=1	1.5171e+06	24081
1315_1	tr|A0A068WCF9|A0A068WCF9_ECHGR	3.06516	NA	354352	EYTALWR;FFTEGAHHR;FSLDTVGSWDR;IPTVQYLR;IVDFFK;LPLLGIDFTDK;LTSGALVDAPVVK;NATEYAIEK;NEAEGSIILSR;NWNDEIHASR;RLEIELFR;TALDVLSK;TLLFTNDPTVANLTAK;TSVAVECAQVR;TTVSQNPGTLR	0;0;0;0;0;0;0;1;0;0;0;0;0;0;0	1	1	0.0468	12441;21553;33025;15189;3355;29970;32300;17601;27365;30553;19902;7420;51247;29248;26315	-	Vacuolar protein sorting associated protein 13A OS=Echinococcus granulosus OX=6210 GN=EgrG_000774600 PE=3 SV=1	320629	1705.47
1315_2	tr|W6V289|W6V289_ECHGR	8.12301	NA	390592	EYTALWR;FFTEGAHHR;FSLDTVGSWDR;IPTVQYLR;IVDFFK;LPLLGIDFTDK;LTSGALVDAPVVK;LVELDSLAVYWNHDTK;NEAEGSIILSR;NWNDEIHASR;RLEIELFR;TALDVLSK;TLLFTNDPTVANLTAK;TSVAVECAQVR;TTVSQNPGTLR;VFETLVADLLNR	0;0;0;0;0;0;0;1;0;0;0;0;0;0;0;1	2	2	0.0479	12441;21553;33025;15189;3355;29970;32300;56017;27365;30553;19902;7420;51247;29248;26315;38975	-	Vacuolar protein sorting-associated protein OS=Echinococcus granulosus OX=6210 GN=EGR_00351 PE=3 SV=1	2.37044e+06	11507
233_1	tr|W6ULH6|W6ULH6_ECHGR	5.59569	NA	39876	TIAVGNPGDRVEVFAEK;VEVFAEK	1;1	2	2	0.0464	53393;6068	tr|A0A068WH91|A0A068WH91_ECHGR	Basigin OS=Echinococcus granulosus OX=6210 GN=EGR_03244 PE=4 SV=1	5.9121e+06	422293
959_1	tr|W6UMC1|W6UMC1_ECHGR	2.1107	NA	102233	SQLLEEFR	1	1	1	0.0084	16781	tr|A0A068WHJ5|A0A068WHJ5_ECHGR	Maternal protein pumilio OS=Echinococcus granulosus OX=6210 GN=EGR_02486 PE=4 SV=1	2.02378e+06	57822.4
1427_1	tr|A0A068WGI3|A0A068WGI3_ECHGR	19.5215	NA	97553.2	GIGGDDFEGQQQQK;IITAVEK;INDPFLQVK;VDTTLTVLK;VLAINILGR	1;1;1;1;1	5	5	0.0544	44678;3612;19750;15193;14082	-	AP-1 complex subunit gamma OS=Echinococcus granulosus OX=6210 GN=EgrG_000669200 PE=3 SV=1	525709	11428.5
277_1	tr|A0A068WI30|A0A068WI30_ECHGR	12.8254	NA	21848.8	IFKDANDDTR;TVSSNWSCLEGVDPASSLK;VTFVEDAVAIYINNELANQINLAHK	1;1;1	3	3	0.2769	27674;59198;69734	tr|W6USN7|W6USN7_ECHGR	Suppressor of G2 allele of SKP1 OS=Echinococcus granulosus OX=6210 GN=EgrG_001006400 PE=4 SV=1	152645	13876.8
768_1	tr|U6J9J8|U6J9J8_ECHGR	29.6296	NA	28084.2	ILGIGDFYYHLAVR;KLQCLGNGFK;LAESHAAHINVQQCVK;LGWTHER;SSHESDICQDDVIR;SSLEYFASK;SYWFPSLLTTK	1;1;1;1;1;1;1	7	7	0.3293	49016;25782;53460;10095;49652;17231;36423	-	Vacuolar-sorting protein SNF8 OS=Echinococcus granulosus OX=6210 GN=EGR_02396 PE=3 SV=1	1.44852e+06	85207.1
1421_1	tr|W6UM30|W6UM30_ECHGR	5.25985	NA	23605.9	SLGQGVCSSFAR	1	1	1	0.0543	32223	tr|A0A068WG93|A0A068WG93_ECHGR	Putative transporter SVOPL OS=Echinococcus granulosus OX=6210 GN=EGR_02401 PE=4 SV=1	1.40129e+07	2.00184e+06
1423_1	tr|A0A068WLU1|A0A068WLU1_ECHGR	15.023	NA	81053.9	FKPYLK;IFHALCVYK;LLHILEVDQDFQISGIQPYK;TIVQHILEQQLFESAR	1;1;1;1	4	5	0.072	4730;24826;64832;56267;56266	tr|W6UXA2|W6UXA2_ECHGR	Sn1 specific diacylglycerol lipase beta OS=Echinococcus granulosus OX=6210 GN=EgrG_000642000 PE=4 SV=1	3.09386e+06	75460.1
1319_1	tr|A0A068WGR1|A0A068WGR1_ECHGR	73.1353	NA	62665.2	AIDQSEFDGFEYLNPLLIK;EIITDEEDIDWVQTEK;FLNKDPTER;FYYLK;HVFEIASNHPFLVGLHSCFQTPSR;IWGLGQQGYK;KEIITDEEDIDWVQTEK;LDNVLMDLEGHIK;LTDYGMCK;RVQPPYRPEETDDYNLIHFDPTFTNEK;SEQVGLEHFK;SPWEGIGSSNNPDQNTEEYLFQVILTKPIR;VEGDGVVIPQIPVK;VFQVEYKPTSK;VQPPYRPEETDDYNLIHFDPTFTNEK;WIDDEGDPCMLTSDAELK	1;1;1;1;1;1;1;1;1;1;1;1;1;1;1;1	16	20	0.3931	62579;57491;22812;1656;69580;69579;24749;60259;60258;44221;15044;72177;26304;72638;41982;35534;35533;71553;71554;60322	-	Protein kinase C OS=Echinococcus granulosus OX=6210 GN=EgrG_000455600 PE=3 SV=1	1.52303e+08	5.64086e+06
231_1	tr|W6UI76|W6UI76_ECHGR	50.0296	NA	78296	DFVADGSAPCLLYGYGGFR;FTIGHAWQSDYGDVSKEEVFR;GLDLSSFEAK;IAELWDYEK;INYDITGK;LGQPQSEDVLCVEWPDNPK;LIAINLDDLNR;LLSSAEVTDCGR;QVFYSSK;VSDPYR;YIATLQEVIGR;YLMTYSPLHNIR	1;1;1;1;1;1;1;1;1;1;1;1	12	12	0.2108	59778;66348;19276;25829;11633;62557;32296;34517;8043;1787;31941;44757	tr|A0A068WK87|A0A068WK87_ECHGR	Prolyl endopeptidase OS=Echinococcus granulosus OX=6210 GN=EGR_04427 PE=3 SV=1	2.20383e+07	537520
954_1	tr|W6UAV8|W6UAV8_ECHGR	3.57287	NA	126719	FTVEPTEHLDEVAR	1	1	1	0.0125	49190	-	Xenotropic and polytropic retrovirus receptor OS=Echinococcus granulosus OX=6210 GN=EGR_06679 PE=3 SV=1	51405.1	951.947
733_1	tr|W6UAR3|W6UAR3_ECHGR	5.25985	NA	22898.8	VAPEEFQETISK	1	1	1	0.0577	38324	tr|A0A068W722|A0A068W722_ECHGR	Cysteine-rich hydrophobic domain-containing protein OS=Echinococcus granulosus OX=6210 GN=EGR_07512 PE=4 SV=1	0	0
239_1	tr|A0A068WHH0|A0A068WHH0_ECHGR	48.0808	NA	90103.2	DFASVEDALSK;DTAVVGLQR;FTEFPELSAIPKPITPK;FYSYVDTNFDSR;GYEEQLAGVNR;IINDELTLMIADGTVDR;ILVDGANVIVLNVGQQAALK;QPPSGELLLNR;SAFNHLTSDIGVVK;SFLSTSPIR;TVPNDITLITSTR;VGQFLLYQLR	1;1;1;1;1;1;1;1;1;1;1;1	12	13	0.193	26864;13549;56338;45012;30196;55587;59181;29484;43808;43805;16075;41071;30293	-	Glutamate receptor ionotropic kainate OS=Echinococcus granulosus OX=6210 GN=EgrG_001066000 PE=4 SV=1	1.05544e+07	285253
731_1	tr|U6J011|U6J011_ECHGR	57.2857	NA	77665.9	AENALSYNFDLK;DCVPQIITPELR;FYTAPTVIR;IAPFAAPDYIQAAPVLPK;IGAIHSVVFAGFSAESLSER;IIKNEFDTGGK;NEFDTGGK;QELVNLVR;QPAEFWTNISSQFHWEVKPR;SRPLEHCIVLR;TNLCYNCLDR;VANEAMDICESK;VGAPVPVSDCPGIRPVQNFSIR;VLVTCDGAWR;WFSDGK;YWSIVER	1;1;1;1;1;1;1;1;1;1;1;1;1;1;1;1	16	17	0.2717	38675;41534;19334;55397;55396;60019;29366;8499;14184;66506;38433;35657;37728;64944;26583;1915;13227	-	Acetyl-coenzyme A synthetase OS=Echinococcus granulosus OX=6210 GN=EGR_07909 PE=3 SV=1	1.06553e+07	287982
1313_1	tr|A0A068WC49|A0A068WC49_ECHGR	16.743	NA	19190.8	FWSICAHR;LVHLYDELTESQLGVPTK;QGSNLAFLYK;WGIDEGAASQLCSLIDPTGK	1;1;1;1	4	4	0.3353	19926;59302;24160;60857	-	Calcium binding EF hand domain containing protein OS=Echinococcus granulosus OX=6210 GN=EgrG_001001600 PE=4 SV=1	7.17109e+06	597591
237_1	tr|A0A068WTE7|A0A068WTE7_ECHGR	113.986	NA	120744	AENYDIAPADR;ASVVNVPQFVPR;DFDDCIVWAR;DTFEGLFVQQSNALR;EFTIIDATGEQPTSVFIQSVEK;EGVVVSVEESAHGLHDGDYVTFSEVR;GNELTADILR;GNVQVVIPHLTESYSSSQDPPEK;GSMHEWR;ILITGLSGLGLEIAK;KPLLESGTLGTK;LAELNNYVTLNVVK;LFITDMDVIEK;MDFLELAEAYK;MQMLNLVESVSK;NFAMMGVSCR;NFPYQIEHTLQWAR;NLWQDLYSNSIR;NPNFLISDFAK;QFLFRPWDIGK;SDLIAAQGR;SYTQNPEEFISK;VFAQDSK;VPIPWNEEDAETFVECCK;YFVVGAGAIGCEHLK	1;1;1;1;1;1;1;1;1;1;1;1;1;1;1;1;1;1;1;1;1;1;1;1;1	25	31	0.3061	30137;34828;33855;51369;65952;65953;69849;69850;21580;66833;10316;44290;30715;30716;47843;35423;35746;38377;26204;53415;53416;44796;32068;39826;39827;12003;41686;4659;62698;62697;48616	tr|W6UFQ0|W6UFQ0_ECHGR	Ubiquitin modifier activating enzyme 1 OS=Echinococcus granulosus OX=6210 GN=EgrG_000711500 PE=3 SV=1	2.52659e+07	407514
737_1	tr|W6U675|W6U675_ECHGR	59.2008	NA	85362.7	AFEAGIK;ATVYYNR;FDDASLEK;FFDLADVSR;FSAYQKPWLCISTSK;GQPLDPTVAAITK;KAAGGLLELR;KTAENIVLDYVTGETPK;KWIALTTAYK;NAAVLAHK;QAAFENIIDSMK;RPAVLGTVTAK;SVNAGLPIDLK;TAENIVLDYVTGETPK	1;1;1;1;1;1;1;1;1;1;1;1;1;1	14	17	0.1758	1763;9485;11658;19432;53759;34712;17041;55286;55285;27714;6191;6230;37739;22333;23293;51996;51995	tr|A0A068WZ45|A0A068WZ45_ECHGR	Coiled-coil and C2 domain-containing protein 1-like protein OS=Echinococcus granulosus OX=6210 GN=EGR_08461 PE=3 SV=1	3.04377e+07	780454
273_1	tr|W6UTD5|W6UTD5_ECHGR	2.72906	NA	51224	QIEENNQDVR	1	1	1	0.0217	30731	-	RNA polymerase II-associated protein OS=Echinococcus granulosus OX=6210 GN=EGR_00169 PE=4 SV=1	511791	17648
1311_1	tr|U6J5W7|U6J5W7_ECHGR	25.6293	NA	11391.7	EGFTVIPYTFSPGTTFPDHTHAVDKK;FSFTMYGK;ITHWDANTDGVFSEGK;NTVHAAHVVGNEDVGFLDASK;NTVHAAHVVGNEDVGFLDASKH;TVVLSAGDTIFVPK	1;1;1;1;1;1	6	8	0.819	70293;14685;52685;62011;62009;64323;64320;41843	-	Expressed protein OS=Echinococcus granulosus OX=6210 GN=EGR_02661 PE=4 SV=1	2.7634e+06	460567
393_1	tr|W6UPA3|W6UPA3_ECHGR	35.8174	NA	49796.3	ATFKPSLLAQK;EITLPFR;FGFNDK;LIPLVHEIGK;LNYSDHDVIK;MIGALFIYNHK;NLITQAAIK;NSGAIGSGDDLAPESVSGVAIDDCQFHQCVK;NTSGVQVICSK;TAVDVFR	1;1;1;1;1;1;1;1;1;1	10	12	0.2574	28302;8975;1323;22763;28270;34477;34478;14235;71847;27559;5327;5321	tr|A0A068WG85|A0A068WG85_ECHGR	AP-2 complex subunit mu-1 OS=Echinococcus granulosus OX=6210 GN=EGR_02392 PE=3 SV=1	8.02865e+06	308794
500_1	tr|A0A068WLD2|A0A068WLD2_ECHGR	13.4681	NA	118217	FAIAVEDFGLK;LIVQDLLACLQGSDGVYVK;TLLDFILK	1;1;1	3	3	0.0358	28657;60264;13782	tr|W6V767|W6V767_ECHGR	Gamma-tubulin complex component OS=Echinococcus granulosus OX=6210 GN=EgrG_000621500 PE=3 SV=1	76965.7	1374.39
1033_1	tr|A0A068W831|A0A068W831_ECHGR	26.2752	NA	54139.5	AIILPTMWLYFK;ETYESVK;FISGIGGSCDTPMYADMAR;LDRETYESVK;LFQPQLGHTK;MVPANDLDCALSYLR;TYWNDQVAR	1;1;1;1;1;1;1	7	7	0.1546	44178;7864;59465;30469;26009;51677;24941	-	MFS transporter ceroid lipofuscinosis neuronal OS=Echinococcus granulosus OX=6210 GN=EgrG_000843800 PE=4 SV=1	1.43488e+07	717440
1031_1	tr|W6UGZ9|W6UGZ9_ECHGR	18.0653	NA	69139.7	ACLDCWR;GCGYAVLASHK;LQQLFR;SLEVLHER;YEDFLLHQYLIHDKR	1;1;1;1;1	5	7	0.0742	14670;25589;25587;5162;14810;58031;58029	tr|A0A068WE19|A0A068WE19_ECHGR	RBR-type E3 ubiquitin transferase OS=Echinococcus granulosus OX=6210 GN=EGR_04274 PE=4 SV=1	3.47521e+06	157964
502_1	tr|W6UUV9|W6UUV9_ECHGR	19.0816	NA	45666.1	APLLVTTATCVCR;KLEPLEFQK;LLQELGKPGAIR;SLQEVAGNGLR;VDKVPYR	1;1;1;1;1	5	7	0.1281	42575;23596;33770;33769;24435;24436;9024	tr|A0A068X199|A0A068X199_ECHGR	DUF5734 domain-containing protein OS=Echinococcus granulosus OX=6210 GN=EGR_07953 PE=4 SV=1	5.93566e+06	258072
395_1	tr|U6J390|U6J390_ECHGR	2.65929	NA	23414.5	VGVVVNEK	1	1	1	0.0379	7249	-	partner of Y14 and mago OS=Echinococcus granulosus OX=6210 GN=EGR_02128 PE=3 SV=1	405407	28957.6
278_1	tr|W6UE82|W6UE82_ECHGR	3.57287	NA	158036	LVLLGIRPIR	1	1	1	0.007	24778	tr|A0A068WIY3|A0A068WIY3_ECHGR	5'-nucleotidase OS=Echinococcus granulosus OX=6210 GN=EGR_05727 PE=3 SV=1	0	0
956_1	tr|U6IW87|U6IW87_ECHGR	100.898	NA	50178.1	AICILDHPIDGTNGSTSCQIIIPQNQVGR;ANNIFVSSSYDATTHFETTCDDVLDIYER;CTMQAVFDK;DWNVDLIPK;EALSSDLMGMFEK;ECILSGLMSVAGK;ELVPGIR;FGVDNNTQDFVGHAICLYR;KHDIYISCVSHDHNVAAKPFFIALVATTVETQQPER;KLLIFTDGVDENKPDTWGELPLNK;LLGHMMDCFVSVSNLYEPINDGK;LLIFTDGVDENKPDTWGELPLNK;LLLHTGVTR;LRDWNVDLIPK;LSAVYGGTYMLNKPFEGFVMENGK;LYSDSLSR;NLCALDAIR;NSYYGGESTSITPLDELFK;SVGGSYVYK;TCPGEQVYKR;VICDPSYAPDLVR;YGSSPYLYPLYGLGELPQGFAR	1;1;1;1;1;1;1;1;1;1;1;1;1;1;1;1;1;1;1;1;1;1	22	35	0.7517	71607;71615;71609;71606;72447;72446;21426;21452;42362;37647;4100;62747;62748;62777;62776;62775;73979;73978;69228;68173;67886;67887;16167;37879;37878;68316;12565;17996;60959;60941;13577;30320;44611;66052;66051	-	Rab GDP dissociation inhibitor OS=Echinococcus granulosus OX=6210 GN=EGR_07503 PE=3 SV=1	4.88933e+07	1.88051e+06
389_1	tr|W6UKA7|W6UKA7_ECHGR	2.18946	NA	84591.6	QYSTIESVVQLLR	1	1	1	0.0168	46109	tr|A0A068WT24|A0A068WT24_ECHGR	NAD-dependent deacetylase sirtuin-1 OS=Echinococcus granulosus OX=6210 GN=EGR_03567 PE=4 SV=1	0	0
1428_1	tr|U6J1J8|U6J1J8_ECHGR	16.6688	NA	11590.9	ADLLYCTEDEMAK;DIQFLVYQYEQVK;LGGHWHVIVGR;TADVDDYK	1;1;1;1	4	4	0.4545	46922;49977;29886;11760	-	Dynein light chain 1, cytoplasmic OS=Echinococcus granulosus OX=6210 GN=EGR_00994 PE=4 SV=1	2.49073e+06	311342
1072_1	tr|A0A068WID7|A0A068WID7_ECHGR	3.07941	NA	54221.9	QILEEEKR	1	1	1	0.0159	17901	-	Solute carrier family 13 OS=Echinococcus granulosus OX=6210 GN=EgrG_000597400 PE=3 SV=1	0	0
574_1	tr|A0A068WT98|A0A068WT98_ECHGR	3.03506	NA	14442.1	YDFNEMSR	1	1	1	0.063	18953	tr|W6UKG4|W6UKG4_ECHGR	Expressed protein OS=Echinococcus granulosus OX=6210 GN=EgrG_000705600 PE=4 SV=1	0	0
805_1	tr|A0A068WJX0|A0A068WJX0_ECHGR	2.46016	NA	81221.2	DYAEQR;EALDDLR;EFLSEMK;LQDQTAQIR;LQEEEELQLALALSASEAESK;NCGNVFCGECTTGR;QEEFLTALR;QVATDSTLQTLFK;VCDSCLHDLTR	0;0;1;0;0;0;0;0;0	1	1	0.1347	3998;6593;9329;19671;63837;48849;21950;42080;38213;38217	-	Hepatocyte growth factor-regulated tyrosine kinase substrate OS=Echinococcus granulosus OX=6210 GN=EgrG_000656400 PE=4 SV=1	318732	10281.7
805_2	tr|W6U915|W6U915_ECHGR	4.36915	NA	82256.7	DAINSLK;DYAEQR;EALDDLR;LKPPTPQLICLE;LQDQTAQIR;LQEEEELQLALALSASEAESK;NCGNVFCGECTTGR;QEEFLTALR;QVATDSTLQTLFK;VCDSCLHDLTR	1;0;0;1;0;0;0;0;0;0	2	2	0.1493	2964;3998;6593;39944;19671;63837;48849;21950;42080;38213;38217	-	Hepatocyte growth factor-regulated tyrosine kinase substrate OS=Echinococcus granulosus OX=6210 GN=EGR_07655 PE=4 SV=1	1.046e+07	326874
807_1	tr|A0A068WDT9|A0A068WDT9_ECHGR	119.708	NA	110125	AAQGLLLGAQQK;ADGSASLAASTDFQR;ALTENMLYR;DCFFLLR;DTNMPPILIWTK;DYLSSDLDR;FVCSTHDEVAR;GHGSNTNLYATPQPEFGR;GQYLVDCPSWLAFLGEDKR;GYFLAPTSK;HFGYFR;IWELISTEIR;KEGGKPCNIELHGVALK;KTEDEQNAWNSHK;LIEAYGALMFVQSSLTESLNK;LKTEVEITGGQTSINMK;NLNSYLSHGPSSR;REDSLNLNENLFPHLDEVLK;RLQYSNHFISR;RPSCSSITTPTPDTSGGTDSSK;SLLENYDGQHIR;TLFVDEGLTTSASR;TLLEWMK;TLQELIDLHAR;VFTEGFDNFGK;VLEAAEER;YFADNLKEDWVDVDSSNTK	1;1;1;1;1;1;1;1;1;1;1;1;1;1;1;1;1;1;1;1;1;1;1;1;1;1;1	27	34	0.3629	27893;44200;22180;14147;40956;20342;35263;57064;63181;14871;6304;31730;54673;47743;64254;64255;54645;41132;41095;65352;65350;65351;40528;62938;62939;41743;41744;44219;11459;34597;34600;31753;11185;63057	-	Dbl y DH domain OS=Echinococcus granulosus OX=6210 GN=EgrG_000817100 PE=4 SV=1	4.06375e+07	634961
1070_1	tr|U6JMR8|U6JMR8_ECHGR	29.6944	NA	22934.3	DPSSVTYLTDR;IMPYLR;INATNGDLLLCVYDVR;MGIAGLGVENR;QVNNLSCTTEK;TGGSGETDVFTASR;VVDLYLR	1;1;1;1;1;1;1	7	8	0.3671	31337;4583;54307;22588;33659;33722;38665;9083	-	Expressed conserved protein OS=Echinococcus granulosus OX=6210 GN=EGR_08855 PE=4 SV=1	9.55611e+06	868737
1534_1	tr|A0A068WXF6|A0A068WXF6_ECHGR	21.6806	NA	30489.9	FLNEASQEQADEIAQFLLK;FTNSLSEK;LWDLIMTANK;SLAFQGMEK;TLAYYDPSTPEGK	1;1;1;1;1	5	5	0.213	62239;11718;28334;16181;41574	-	Tetraspanin OS=Echinococcus granulosus OX=6210 GN=EgrG_000355700 PE=4 SV=1	4.92989e+06	448171
1039_1	tr|A0A068WD44|A0A068WD44_ECHGR	7.39251	NA	17651	SILAPANPAVGK;TPEQVAEEK	1;1	2	2	0.125	23973;17178	-	Camp regulated phosphoprotein OS=Echinococcus granulosus OX=6210 GN=EgrG_000873100 PE=3 SV=1	2.17156e+06	361927
1469_1	tr|U6J4Q2|U6J4Q2_ECHGR	3.57287	NA	10304	NFGSYVTHEAR	1	1	2	0.1236	32904;32905	-	Dynein light chain OS=Echinococcus granulosus OX=6210 GN=EGR_09465 PE=3 SV=1	0	0
1068_1	tr|A0A068WPH7|A0A068WPH7_ECHGR	17.8657	NA	20225.5	GHIEDVVIDEAYR;QETISMCVR;QLTVVGDISKEEFECR;STDYDYLHLLK;VAFYER	1;1;1;1;1	5	6	0.309	45111;23054;56237;37800;37797;4124	-	Glucosamine 6-phosphate N-acetyltransferase OS=Echinococcus granulosus OX=6210 GN=EgrG_000065000 PE=3 SV=1	6.00581e+06	461986
504_1	tr|A0A068WIQ7|A0A068WIQ7_ECHGR	73.4081	NA	158312	AVYPDAR;EGNLQWR;FDVSVTK;FFTTPESDEIR;FSHLSNEEYLPQK;GSLELTPAWNPENR;LIVNDLK;LNDGGGLSLR;LTPTAQGR;QPLDLVR;RPHGEVVLQTHHTAASK;RPVISADTLR;STDFLTEAIFQR;TDALLHIR;TQIHGGPTTLVAQR;TTLLDVIPSGILR;VEWSEEGKR;VNGISVQGSFIR;VSNLQPGR;VVANWPGVER;YPSLFDFTAPK	1;1;1;1;1;1;1;1;1;1;1;1;1;1;1;1;1;1;1;1;1	21	24	0.1523	4515;10325;4707;36344;47880;47694;5676;5741;15786;7236;7025;55068;55069;23359;23361;40889;12489;43402;39358;22792;32728;8662;23285;33222	-	GPI anchored surface glycoprotein OS=Echinococcus granulosus OX=6210 GN=EgrG_000606700 PE=4 SV=1	1.86798e+07	214711
576_1	tr|A0A068WBF2|A0A068WBF2_ECHGR	95.0341	NA	98415	ALGTGDCPLPSEK;DVTIQGAVEDYLSR;EMYAESVGEVAAR;FAGANPETDER;FGETYPGEVLDIQDDGIWIR;HTEAVLYDGVVMIK;IAPHLPDLAPIVER;LEMGSFVK;LLENDTTAFVDASR;LLETGLFFGSK;LTLLPNIYHRPVVK;MAANDHLIFISSR;NYVGDSVIR;QILSEECGLAK;SLYGLLENR;SNMADGGTQEAFK;TADPLFSVTEEK;VFISDVTSECR;VPYDYEIVPMPYNK;WVPFNSPNFLR	1;1;1;1;1;1;1;1;1;1;1;1;1;1;1;1;1;1;1;1	20	24	0.2842	36499;47169;40044;28425;64401;47436;46308;46309;46310;10829;46673;28787;49745;49744;43189;43188;16789;30983;19155;37122;36106;34794;51428;38287	-	Ribosomal protein S1 RNA binding domain OS=Echinococcus granulosus OX=6210 GN=EgrG_000975800 PE=4 SV=1	1.53667e+07	313605
391_1	tr|U6IZU4|U6IZU4_ECHGR	12.6459	NA	56694.9	GFFSEIVNSVTDLK;SALTFQEADIPENR;SLEIEEK	1;1;1	3	3	0.0697	46847;47856;7462	-	Serine/threonine-protein phosphatase 2A 55 kDa regulatory subunit B OS=Echinococcus granulosus OX=6210 GN=EGR_00903 PE=3 SV=1	1.23515e+06	44112.5
274_1	tr|A0A068WUF8|A0A068WUF8_ECHGR	17.6015	NA	80369.3	GTGVLFTLGDYK;KLTFNGITTTSSTISGPLALNTPSIDGHR;LDLFMAK;QQETPVLR;TFCNCPQNR	1;1;1;1;1	5	5	0.0902	32324;70888;6886;14166;27782	-	Cj cadherin OS=Echinococcus granulosus OX=6210 GN=EgrG_000054300 PE=4 SV=1	649768	20960.3
1035_1	tr|U6J4J7|U6J4J7_ECHGR	52.2676	NA	26588.3	AFASTFFGKPPESSFEEALK;AKQEWITEGLDVMK;ALPGRPYTVCR;FLVLNNGPK;FPTACLSNTWYGIMLNVK;FYLDAEK;GYEANPNDFMTLHCLGSWCFEVASLGK;IAQCYDR;KPDGNYNDMDLELMWR;LHAQDPEVEELQHECHR;LKKPDGNYNDMDLELMWR;QEWITEGLDVMK	1;1;1;1;1;1;1;1;1;1;1;1	12	31	0.6435	62157;62158;62160;62155;62161;49342;49762;33446;15893;15888;15843;15844;15892;15889;15839;60809;9424;71318;11702;58217;58216;61038;61039;61040;62932;62933;62940;62931;41926;41094;42723	-	Regulator of microtubule dynamics protein OS=Echinococcus granulosus OX=6210 GN=EGR_00442 PE=4 SV=1	4.51571e+07	3.47362e+06
506_1	tr|A0A068W7S5|A0A068W7S5_ECHGR	651.414	NA	230312	AFIPIEK;AFIPIEKDLIIK;AGSPPLIHEQDMDKPYEPEK;AGSPPLIHEQDMDKPYEPEKK;AIDLQPSDPSGLADPYVEIR;AKEDSDDEDIEANILRPAGLQLRPALMK;APLAYTDAQGYEK;ASGFWPFADQPGPDGQLTGK;ATCGIPQTYNLTGLNQWR;AVNLKNVELIGK;DDKDFVDPFALVK;DDVIGETVIDLENR;DFVDPFALVK;DGDDGFLPTFGPSFINLYGSPR;DMDMEQLDPNIDWYSK;DNQLPSEILATFCK;DNQLPSEILATFCKK;DNYIPNNLNPEFGR;DSEEDDEENFAGDFK;DTGATSFLEDVFYNEK;DTGATSFLEDVFYNEKR;ECTLDIMNTSSPK;EDDGLLTVVAETYENEAQIVGK;EDSD…	1;1;1;1;1;1;1;1;1;1;1;1;1;1;1;1;1;1;1;1;1;1;1;1;1;1;1;1;1;1;1;1;1;1;1;1;1;1;1;1;1;1;1;1;1;1;1;1;1;1;1;1;1;1;1;1;1;1;1;1;1;1;1;1;1;1;1;1;1;1;1;1;1;1;1;1;1;1;1;1;1;1;1;1;1;1;1;1;1;1;1;1;1;1;1;1;1;1;1;1;1;1;1;1;1;1;1;1;1;1;1;1;1;1;1;1;1;1;1;1;1;1;1;1;1;1;1;1;1;1;1;1;1;1;1;1;1;1;1;1;1;1	142	449	0.7031	5894;5892;39504;63657;65577;65574;65575;61611;61610;71346;71347;40841;40878;40843;59993;59991;59992;59994;59989;59990;60006;60311;60307;60305;60310;60312;60288;60287;60309;60313;60317;60308;33964;44798;44799;47774;47773;24832;65035;65047;65034;65036;58293;58292;48984;48985;52367;52368;49725;49751;49726;49753;49754;49756;49752;51902;54269;54268;54298;58078;58079;44145;44195;44196;65339;65327;65330…	-	Myoferlin OS=Echinococcus granulosus OX=6210 GN=EgrG_000825200 PE=3 SV=1	2295578670	2.1454e+07
637_1	tr|U6FRA8|U6FRA8_ECHGR	13.2281	NA	15390.9	ESFDDIK;FDESITPTIGVDFTPSK;NAEGVLLVYDVTR	1;1;1	3	3	0.2681	7751;54745;41938	-	Rab GTPase OS=Echinococcus granulosus OX=6210 GN=EgrG_002011000 PE=4 SV=1	1.98202e+06	220225
1212_1	tr|W6UMW3|W6UMW3_ECHGR	44.421	NA	39184.2	AIADFQDTYGIK;DLYDEICEMR;IGASSLLGGIESR;IGASYIPIAAVATGFPSGQYSLK;IYSLLHNTAPR;LEGNPEIQWLLR;TAAVCVYPYQVK;TALDYLER;TLALEGR;TVGFIDLTTLAGDDTSANVHR	1;1;1;1;1;1;1;1;1;1	10	12	0.3593	36354;36446;31731;64223;64221;33179;33176;42885;39401;14701;2917;62398	-	2-deoxy-D-ribose 5-phosphate aldolase OS=Echinococcus granulosus OX=6210 GN=EGR_05713 PE=4 SV=1	2.03354e+07	847308
1127_1	tr|W6U4W0|W6U4W0_ECHGR	5.25985	NA	6503.09	GFDTINYSHPR	1	1	2	0.1964	34445;34446	-	40S ribosomal protein S29 OS=Echinococcus granulosus OX=6210 GN=EGR_08990 PE=3 SV=1	969158	242290
1210_1	tr|A0A068X3E4|A0A068X3E4_ECHGR	3.37947	NA	116691	FSLIDLAGNER	1	1	1	0.0104	30159	tr|W6UX12|W6UX12_ECHGR	Kinesin protein KIF2A OS=Echinococcus granulosus OX=6210 GN=EgrG_001159400 PE=4 SV=1	232444	3631.93
635_1	tr|W6URG8|W6URG8_ECHGR	99.623	NA	63056.7	AETVNTQAR;AGSSAFEFDSDVDESATPASQGFGDYVGQATLK;CSEIGEGLSK;DAFIETQHTYASEMAK;ENPNITPEER;ESEMTVIQLDDR;GIHTLFGK;HHFTHNIHVLIADLETIDR;KDAFIETQHTYASEMAK;KTVSSFVPK;LANAQDAEDTIAK;LIVDFGK;LLCEIQK;QGFLPTTHLSITLY;QKAETVNTQAR;QLVDSTVALR;QTFSLSDLIK;RQTFSLSDLIK;SSLDKVQGSIEATQR;SVIMPLK;THVNALK;TQSSDGNVLQTPFIAGIGYKPVK;VTTDYTNYNTQR	1;1;1;1;1;1;1;1;1;1;1;1;1;1;1;1;1;1;1;1;1;1;1	23	33	0.4521	15208;72358;20101;54433;27918;41278;8770;63675;63677;63673;63672;57645;57646;15340;37391;37350;37390;4539;10414;47870;29728;20427;24910;23778;34543;34542;34541;48570;4329;4055;4091;65702;43215	-	Cdc42-interacting protein OS=Echinococcus granulosus OX=6210 GN=EGR_04168 PE=4 SV=1	4.75303e+07	1.58434e+06
599_1	tr|A0A068WST4|A0A068WST4_ECHGR	10.8291	NA	121255	EAFFGIMR;FDLLLR;LLVFTLQK	1;1;1	3	3	0.0203	14146;3784;13730	tr|W6UHA9|W6UHA9_ECHGR	Mif4g type OS=Echinococcus granulosus OX=6210 GN=EGR_04635 PE=3 SV=1	135283	2147.35
1078_1	tr|A0A068WAR7|A0A068WAR7_ECHGR	5.25985	NA	10618.4	YGDLTILMYR	1	1	1	0.1087	30744	-	Dynein light chain OS=Echinococcus granulosus OX=6210 GN=EgrG_000990900 PE=4 SV=1	205504	34250.6
801_1	tr|A0A068WTE6|A0A068WTE6_ECHGR	5.25985	NA	280673	TILTTEAVFPHLR	1	1	1	0.0051	44285	tr|W6U383|W6U383_ECHGR	Dedicator of cytokinesis protein 9 OS=Echinococcus granulosus OX=6210 GN=EGR_09580 PE=3 SV=1	0	0
1442_1	tr|U6JQ55|U6JQ55_ECHGR	6.22907	NA	34502.3	LGDTLTDFK;VASVPGGASWLDVILPIITK	1;1	2	2	0.0935	16146;59189	-	Ubiquitin carboxyl-terminal hydrolase OS=Echinococcus granulosus OX=6210 GN=EGR_08494 PE=3 SV=1	121746	7609.1
639_1	tr|A0A068X155|A0A068X155_ECHGR	52.0069	NA	33887.9	AVVALVILK;AYETASLLFR;DIGNFDK;ENVYTTYQACGK;IDEAEELVQK;KQSFFHCAK;LTSLGASR;LVQEDSVAAGK;NLETEFAR;QYHFDETDDAAAVAK;RSPDIDSALEYYGR;VITLPTFR;YLQAADFAGQSAR	1;1;1;1;1;1;1;1;1;1;1;1;1	13	15	0.4408	11749;26112;5362;41178;26308;24946;5158;22593;14623;50178;50179;49170;49171;12946;39329	tr|W6UA62|W6UA62_ECHGR	Gamma soluble NSF attachment protein OS=Echinococcus granulosus OX=6210 GN=EGR_06815 PE=3 SV=1	1.74502e+07	698007
109_1	tr|W6U4S1|W6U4S1_ECHGR	21.2804	NA	164171	ETVTSYGTVNLCR;IIIVSAK;IPVLPLHDPGLS;SVLFCGTSVIQSR;VLLEYTR;VTAVVVR;YVLNNEDEHYYLLPNWDERPSSDIVNAQPLVESEVACR	1;1;1;1;1;1;1	7	7	0.0661	44366;2176;31615;42159;9876;2172;74185	tr|A0A068X0Z2|A0A068X0Z2_ECHGR	Cation-transporting ATPase OS=Echinococcus granulosus OX=6210 GN=EGR_09588 PE=3 SV=1	1.8123e+06	29230.6
803_1	tr|A0A068WVD7|A0A068WVD7_ECHGR	4.21845	NA	12590.3	AEVIEVVK	1	1	1	0.0734	9515	tr|W6UF34|W6UF34_ECHGR	Learning associated protein 18 OS=Echinococcus granulosus OX=6210 GN=EGR_05626 PE=4 SV=1	0	0
1075_1	tr|A0A068WL60|A0A068WL60_ECHGR	20.9386	NA	40433.7	HTEVFTEWLEK;KLGILGFSWGGR;LGILGFSWGGR;TLLAEEHHK;VSCWEDVSALLSTANTYLR	1;1;1;1;1	5	5	0.1401	40374;33543;25614;19999;62078	tr|W6UI81|W6UI81_ECHGR	Carboxymethylenebutenolidase homolog OS=Echinococcus granulosus OX=6210 GN=EGR_07283 PE=3 SV=1	1.18999e+06	79332.8
547_1	tr|W6VCL2|W6VCL2_ECHGR	3.13432	NA	29026.6	SLTLSHNK	1	1	1	0.0312	10172	tr|A0A068WA16|A0A068WA16_ECHGR	Ras suppressor protein OS=Echinococcus granulosus OX=6210 GN=EGR_00579 PE=4 SV=1	94513.5	7876.12
100_1	tr|A0A068X0R4|A0A068X0R4_ECHGR	25.2443	NA	59549.4	APGIIPR;EAYPGDVFYLHSR;FEQDFLK;HALIIYDDLSK;LELAQYR;LTELLK;QMSLLLR	1;1;1;1;1;1;1	7	7	0.1062	1185;46751;11772;33348;9811;868;8215	-	ATP synthase subunit alpha OS=Echinococcus granulosus OX=6210 GN=EgrG_000720500 PE=3 SV=1	1.8873e+06	55508.9
844_1	tr|W6U7D3|W6U7D3_ECHGR	57.1449	NA	35169.4	AAEAQNHSLSTPVSPSGDTKPQQR;AEGTGDSAVLLPIYDVQTTHIPGDTLLFK;DPLGIVLVIR;LAVDNNEPIEVHFSVDPLLEIDK;LAVDNNEPIEVHFSVDPLLEIDKIK;NPIDVDQDEPK;QQFIGNWQMEILDMNEASSK;QSCQLQSPPMVQR;RDPLGIVLVIR;SAVYWK;STEGYELSVVCK;WTLNKNPIDVDQDEPK	1;1;1;1;1;1;1;1;1;1;1;1	12	22	0.4984	66761;71178;71177;21168;67817;67816;67837;70006;70020;70005;32267;65005;65006;46316;46930;31219;31218;2615;38010;56256;56255;56279	-	Basigin OS=Echinococcus granulosus OX=6210 GN=EGR_08038 PE=4 SV=1	6.09131e+07	3.38406e+06
377_1	tr|W6UNA6|W6UNA6_ECHGR	10.5197	NA	22251.1	RTDDISSWDQEFLR;SDFTPQEEEQVR	1;1	2	2	0.134	52453;42713	-	S-phase kinase-associated protein OS=Echinococcus granulosus OX=6210 GN=EGR_02169 PE=3 SV=1	715182	51084.4
549_1	tr|W6U384|W6U384_ECHGR	3.13432	NA	21629.7	SLLLSLK	1	1	1	0.0366	3617	tr|A0A068WIQ9|A0A068WIQ9_ECHGR	Clathrin light chain OS=Echinococcus granulosus OX=6210 GN=EGR_10143 PE=3 SV=1	0	0
375_1	tr|W6UPL2|W6UPL2_ECHGR	8.63932	NA	92846.9	LLAEDEKDSLK;YVNTLLDLFNR	1;1	2	2	0.0274	31772;37816	tr|A0A068WJL8|A0A068WJL8_ECHGR	Cullin-5 OS=Echinococcus granulosus OX=6210 GN=EGR_02007 PE=3 SV=1	283831	5458.29
1679_1	tr|A1E2R8|A1E2R8_ECHGR	2.52259	NA	1391.78	VFPSIVGRPR	1	1	1	0.8333	23364	-	Actin (Fragment) OS=Echinococcus granulosus OX=6210 GN=ActII PE=4 SV=1 >tr|A1E2R9|A1E2R9_ECHGR Actin (Fragment) OS=Echinococcus granulosus OX=6210 GN=ActII PE=4 SV=1 >tr|A1E2S0|A1E2S0_ECHGR Actin (Fragment) OS=Echinococcus granulosus OX=6210 GN=ActII PE=4 SV=1 >tr|A1YR53|A1YR53_ECHGR Actin II (Fragment) OS=Echinococcus granulosus OX=6210 GN=actII PE=4 SV=1 >tr|A1YR54|A1YR54_ECHGR Actin II (Fragme…	222902	222902
1587_1	tr|W6URH0|W6URH0_ECHGR	8.4339	NA	15972.3	AGFSNYDTQISYALDLLK;EAYVAEGK	1;1	2	2	0.1745	58823;8468	tr|A0A068WJW0|A0A068WJW0_ECHGR	Mitochondria fission 1 protein OS=Echinococcus granulosus OX=6210 GN=EGR_01777 PE=4 SV=1	571855	71481.9
102_1	tr|W6UYH3|W6UYH3_ECHGR	2.00002	NA	57609.8	QTNGLGRYATVVTNLLDNTADHAR	1	1	1	0.0449	67631	tr|A0A068WBR9|A0A068WBR9_ECHGR	Homeobox protein abdominal-B OS=Echinococcus granulosus OX=6210 GN=EGR_01310 PE=4 SV=1	0	0
846_1	tr|W6UUM3|W6UUM3_ECHGR	3.19749	NA	33906.1	DANSQVEILK	1	1	1	0.0341	22598	tr|A0A068WCT4|A0A068WCT4_ECHGR	Uncharacterized protein OS=Echinococcus granulosus OX=6210 GN=EGR_00242 PE=3 SV=1	374515	15604.8
396_1	tr|W6UQ91|W6UQ91_ECHGR	10.9388	NA	38560.8	ILVAMLQAQR;TLIEAIK;YLALYGK	1;1;1	3	3	0.0696	24313;4332;6382	tr|A0A068WRB6|A0A068WRB6_ECHGR	Annexin OS=Echinococcus granulosus OX=6210 GN=EGR_01899 PE=3 SV=1	1.41359e+06	61460.4
633_1	tr|W6UUI9|W6UUI9_ECHGR	2.96029	NA	90944.8	FDVGFLR	1	1	1	0.0086	7770	tr|A0A068WFW0|A0A068WFW0_ECHGR	Multiple C2 and transmembrane domain-containing protein OS=Echinococcus granulosus OX=6210 GN=EGR_00890 PE=4 SV=1	101669	2259.3
1216_1	tr|W6U828|W6U828_ECHGR	25.5634	NA	12573.7	DLNVTACPTFLFFR;FNDEDFENLMATLQEISK;KLIILAVDATR;LIILAVDATR;LIMVAFVK;TFIACPQER;TFIACPQERE	1;1;1;1;1;1;1	7	10	0.5648	50773;61375;61374;28867;28869;28868;20442;11480;22923;31160	-	Thioredoxin domain-containing protein OS=Echinococcus granulosus OX=6210 GN=EGR_07846 PE=4 SV=1	6.74414e+06	843017
104_1	tr|U6JJA9|U6JJA9_ECHGR	6.27411	NA	58297.9	LAVFMER;YFLSQELALATSQITELQR	1;1	2	2	0.0503	8442;62568	-	3-phosphoinositide-dependent protein kinase 1 OS=Echinococcus granulosus OX=6210 GN=EGR_10565 PE=3 SV=1	243471	8695.39
840_1	tr|U6JC07|U6JC07_ECHGR	5.48716	NA	22779.3	LSLDEPCVLLQSR;WEEIR	1;1	2	2	0.087	45795;1595	-	Peptidase C15 pyroglutamyl peptidase I OS=Echinococcus granulosus OX=6210 GN=EGR_08651 PE=3 SV=1	223902	31986
398_1	tr|A0A068WLT0|A0A068WLT0_ECHGR	8.906	NA	63625.1	IITEPEIR;VFEDVVR;YLPEYWVPLQWAVR	1;1;1	3	3	0.0527	14179;8345;53885	tr|W6UAI0|W6UAI0_ECHGR	Bestrophin homolog OS=Echinococcus granulosus OX=6210 GN=EgrG_001141800 PE=3 SV=1	5.00748e+06	166916
106_1	tr|A0A068WB58|A0A068WB58_ECHGR	29.9367	NA	19446.8	DIQILNSDMNQK;DLCKPNEIPSNTLPALR;GTGVIHR;GWNCYMTDGK;KDQLEDLK;LDKGTGVIHR;QAESIMLYVVDVIR;WGYDAEQADR	1;1;1;1;1;1;1;1	8	9	0.4821	40371;56899;1938;29916;15131;21215;21214;48572;28676	tr|W6VBX7|W6VBX7_ECHGR	Tegumental antigen OS=Echinococcus granulosus OX=6210 GN=EgrG_001001800 PE=4 SV=1	9.52122e+06	793435
842_1	tr|A0A068WL79|A0A068WL79_ECHGR	8.43962	NA	48467.7	LDLPETAEK;NVSSLDQHLAR;TFISLSVK	1;1;1	3	3	0.0647	16424;30480;9926	tr|W6UL88|W6UL88_ECHGR	COP9 signalosome complex subunit 3 OS=Echinococcus granulosus OX=6210 GN=EGR_02738 PE=3 SV=1	114359	3943.41
1214_1	tr|A0A068WRP4|A0A068WRP4_ECHGR	14.0926	NA	58516.2	GVLNENTYQDIIR;IMVPLFR;SVSSSHFQVAER	1;1;1	3	4	0.0627	45999;8980;35950;35949	-	Serine/threonine protein phosphatase 2A regulatory subunit OS=Echinococcus granulosus OX=6210 GN=EgrG_000253800 PE=3 SV=1	1.31913e+06	73284.9
631_1	tr|U6JC76|U6JC76_ECHGR	31.0614	NA	31348.7	AGFVQSAYGVSK;ATVILAEQMK;EFLPLMATDSR;ELQPSSDWHIYLTAR;FHQLDITDSASR;KVVDLDQPFYF;RPMTLEELDEIMASFVSHAQK	1;1;1;1;1;1;1	7	9	0.3274	28900;21729;32856;53756;38938;38935;37966;65832;65831	-	Carbonyl reductase (NADPH) OS=Echinococcus granulosus OX=6210 GN=EGR_04039 PE=4 SV=1	7.72419e+06	514946
462_1	tr|W6UNE4|W6UNE4_ECHGR	20.3237	NA	44015.7	DIKPDNFLMGIGK;HPQLFFESR;KVSTSIESLCR;LEFIHAR;TVLMLVDQMLWR;YASINAHAGIEQSR	1;1;1;1;1;1	6	6	0.1701	41881;25481;32871;9437;44620;45173	tr|A0A068WFQ0|A0A068WFQ0_ECHGR	Non-specific serine/threonine protein kinase OS=Echinococcus granulosus OX=6210 GN=EGR_01929 PE=3 SV=1	1.2355e+06	72676.4
1353_1	tr|A0A068WNE4|A0A068WNE4_ECHGR	2.9139	NA	52631.1	RLELLLFAHR	1	1	1	0.022	32201	tr|W6UPG3|W6UPG3_ECHGR	Innexin OS=Echinococcus granulosus OX=6210 GN=inx PE=3 SV=1	303017	12625.7
906_1	tr|W6UGA6|W6UGA6_ECHGR	11.5813	NA	36754.7	FSGDLGQK;QLATYISYRPDLAELR;VLSVQSHVVHGYVGNK	1;1;1	3	3	0.1231	7661;56189;51335	-	Pyridoxal kinase OS=Echinococcus granulosus OX=6210 GN=EGR_04549 PE=3 SV=1	704821	41460.1
141_1	tr|A0A068WUV0|A0A068WUV0_ECHGR	95.4853	NA	300491	DQCSHPLEGR;FALLWQFQR;FATCEFPTLFGTNLADLLAR;FCEFFDSK;FISDILER;FLVEHLPTDTYPEVR;GITHTFLLPIGQSK;GLTPLSQSTALLAVLTTHFIGSCPSTSHSR;ISVEAEFMR;LGLSPTAR;LIQQYDR;LMGGLLNR;LPALTALGHPEVVR;LTHHLLQLTAPR;LVAAELLQLITEK;MVDNCLDFLR;NVTTFEPLELFFR;QVAAAWLTSALSSGQVGR;SPHSSAYSSESSSPANQR;SYSVAIDK;TSLLSIR;VVAPLFFILLHPSTAR;WGYQECENK;YNSGTENLAELSCLLK	1;1;1;1;1;1;1;1;1;1;1;1;1;1;1;1;1;1;1;1;1;1;1;1	24	25	0.1095	27910;28599;63228;20081;15332;53764;44963;71461;20236;5672;12294;8853;43124;43125;39555;41547;33019;48417;53395;55294;9292;4451;52818;28874;53656	-	Protein dopey 1 OS=Echinococcus granulosus OX=6210 GN=EgrG_000045200 PE=3 SV=1	1.50715e+07	128816
143_1	tr|A0A068WQJ7|A0A068WQJ7_ECHGR	24.6061	NA	134546	ALQSISPEKR;APIVALR;EICDRPAATANTALVR;GAVANPTATPPHLGTR;LFSLPSISLR;NQLDQPQR	1;1;1;1;1;1	6	6	0.0531	23419;1950;52213;46985;23656;15620	tr|W6V053|W6V053_ECHGR	Lethal2 giant larvae protein 2 OS=Echinococcus granulosus OX=6210 GN=EGR_05828 PE=4 SV=1	1.7582e+07	408883
19_1	tr|A0A068WQT7|A0A068WQT7_ECHGR	26.7946	NA	69867.6	EANIAASNGR;LAGLTLQELDAEGR;LFPSISIDAVR;NCTPALISLLLHFGCR;SPLHTAVAYHQTEVVR;VQSNLCPNVAILR;YLITPAK	1;1;1;1;1;1;1	7	7	0.1372	15869;43711;29147;55149;53557;43628;5235	tr|W6V2H1|W6V2H1_ECHGR	Asparaginase OS=Echinococcus granulosus OX=6210 GN=EgrG_001165500 PE=4 SV=1	2.28918e+07	915671
908_1	tr|W6UDB8|W6UDB8_ECHGR	2.20084	NA	30959.4	TWLAMPGTIYIR	1	1	1	0.0421	40588	tr|A0A068WXV5|A0A068WXV5_ECHGR	Amino acid transporter OS=Echinococcus granulosus OX=6210 GN=EGR_06104 PE=3 SV=1	390278	48784.7
1440_1	tr|A0A068WFV4|A0A068WFV4_ECHGR	3.95308	NA	22832.6	ADSQNVQIR	1	1	1	0.0459	17184	tr|W6V0F1|W6V0F1_ECHGR	Expressed protein OS=Echinococcus granulosus OX=6210 GN=EgrG_001001200 PE=4 SV=1	1.19881e+06	92215.9
373_1	tr|W6UUT7|W6UUT7_ECHGR	5.40715	NA	16518.1	FLTHDSPSVR;LVDHASEAYR	1;1	2	2	0.1316	25326;25484	-	U1 small nuclear ribonucleoprotein C OS=Echinococcus granulosus OX=6210 GN=EGR_02884 PE=3 SV=1	9.29303e+06	1.85861e+06
460_1	tr|A0A068WSZ6|A0A068WSZ6_ECHGR	13.8205	NA	72353.1	DSPDGHFGSK;FMSFHAYLR;LQNLHPNPSR;VTQTSAASFR	1;1;1;1	4	4	0.0592	17974;26160;26470;19322	tr|W6UKU0|W6UKU0_ECHGR	Nuclear protein localization protein 4 OS=Echinococcus granulosus OX=6210 GN=EGR_06378 PE=3 SV=1	1.2627e+06	43541.5
1071_1	tr|A0A068WWN6|A0A068WWN6_ECHGR	15.0161	NA	41445.7	GPQLGDLQTPNK;LFGYKPTVYYPR;TETTDLLQPDCLISLTAPK;VPLASIDVPSGWDVGEK	1;1;1;1	4	4	0.1558	32191;44561;60833;52497	-	NAD(P)H-hydrate epimerase OS=Echinococcus granulosus OX=6210 GN=EgrG_000736050 PE=3 SV=1	884920	58994.6
1077_2	tr|W6UDN8|W6UDN8_ECHGR	35.7276	NA	76896.2	EELIEELASTK;EGSSTTVEYSLTTTENSTK;HAPNPDALR;IGQSPITSTVPGASGTQNQAAGSHISTTTVESHTDGAQDPSKK;IQLLSTK;KIQLLSTK;KLLVGLFK;LLVGLFK;LSNELTRPGLLVSYKPLDEVDMALGR;NQGCQVQDFAYTGGACTAVGR;NVNDSYDPEQTQEK;TATPLGQLTSSSGLVSYSASTDTQR;TGHSTIPAAATGNASVTTTSTTVESHTK;TGQSTSAFGAAR;TIDEPGTTTK;TIDEPGTTTKK;TIDYSLTTTESTSNTTPR	0;0;0;1;1;1;0;0;1;0;0;1;1;0;1;1;0	8	12	0.3529	31819;59158;15220;74039;5057;12036;11288;4455;70253;63282;63281;63283;49833;49856;67027;67024;69095;69100;69102;69094;25015;19027;27466;57981;57982	-	Uncharacterized protein OS=Echinococcus granulosus OX=6210 GN=EGR_05686 PE=4 SV=1	9.17684e+06	296027
371_1	tr|U6J883|U6J883_ECHGR	46.5087	NA	30319.4	AWVSLPK;DNTGHQFVTR;ECLPLSIFLR;FEPGNVCMITGGHNLGR;HPGSVEMVHVR;LNNVFIIGK;VNDTVQIDLTTGR;VPYIVTHDGR;YALTYDECTK;YPAGFMDVISIDR	1;1;1;1;1;1;1;1;1;1	10	12	0.4167	4957;26369;31002;54833;30985;16543;16608;16609;41108;25232;31957;43610	-	40S ribosomal protein S4 OS=Echinococcus granulosus OX=6210 GN=EGR_02001 PE=3 SV=1	5.0795e+06	253975
1077_1	tr|A0A068WNC0|A0A068WNC0_ECHGR	13.4447	NA	69841.9	EELIEELASTK;EGSSTTVEYSLTTTENSTK;HAPNPDALR;IQLVQAITTNR;KLLVGLFK;LLVGLFK;NQGCQVQDFAYTGGACTAVGR;NVNDSYDPEQTQEK;TGQSTSAFGAAR;TIDYSLTTTESTSNTTPR;TTLTTNTPQPAELK;VMVSTTTSQTANK	0;0;0;1;0;0;0;0;0;0;1;1	3	3	0.2311	31819;59158;15220;31567;11288;4455;63282;63281;63283;49833;49856;25015;57981;57982;45088;37801	-	Expressed conserved protein OS=Echinococcus granulosus OX=6210 GN=EgrG_000164900 PE=4 SV=1	2.67218e+07	890725
900_1	tr|W6VCF9|W6VCF9_ECHGR	5.25985	NA	79124.5	IPLYHGWVADPQDRDLVEALR	1	1	1	0.0288	66246	tr|A0A068WA80|A0A068WA80_ECHGR	Ubiquitin carboxyl-terminal hydrolase OS=Echinococcus granulosus OX=6210 GN=EGR_00514 PE=3 SV=1	0	0
1735_1	tr|W6URV7|W6URV7_ECHGR	3.07941	NA	68266.3	YHQDTAFVLR	1	1	1	0.0163	31121	tr|A0A068W853|A0A068W853_ECHGR	Uncharacterized protein OS=Echinococcus granulosus OX=6210 GN=EGR_01508 PE=3 SV=1	469117	14659.9
765_1	tr|A0A068WGZ9|A0A068WGZ9_ECHGR	3.57287	NA	23761.5	IEFLAIDALK	1	1	1	0.049	23655	tr|W6UPX3|W6UPX3_ECHGR	TIP41-like protein OS=Echinococcus granulosus OX=6210 GN=EgrG_000466100 PE=3 SV=1	73264.6	8140.52
13_1	tr|U6IXV3|U6IXV3_ECHGR	95.56	NA	39641.4	ALQASAIAAWQGKPENVK;CAQYYK;DGKPFVELLR;ENASAIVAPGK;FAAINLENTEENR;FAAINLENTEENRR;GLLAADESTSTIGK;GLLAADESTSTIGKR;HISGVILFHETVYQK;ISSHNPSYLAMLENANVLAR;KPWALSFSFGR;KYSVEDNAR;NLNAINK;NLNAINKYPGK;TKDGKPFVELLR;TVPVAVPGIVFLSGGQSELDATR;VDLGVVPLGGTADECTTQGLDNLAQR;VGQAEFLQLAK;VTEQVLSFVYK;YASICQQNGLVPIVEPEVLPDGDHDLETAQR;YSVEDNAR	1;1;1;1;1;1;1;1;1;1;1;1;1;1;1;1;1;1;1;1;1	21	32	0.6722	55394;55395;6634;26339;26340;18622;18689;45365;50086;50111;50082;37540;45291;45292;52552;62351;62352;62377;33828;33827;20232;20231;4258;29965;39652;64238;68827;68826;28300;34826;72739;13264	-	Fructose-bisphosphate aldolase OS=Echinococcus granulosus OX=6210 GN=EGR_00458 PE=3 SV=1	4.55488e+07	1.89787e+06
1737_1	tr|W6UL55|W6UL55_ECHGR	5.25985	NA	23435.5	INAAITIR	1	1	1	0.039	8727	-	Uncharacterized protein OS=Echinococcus granulosus OX=6210 GN=EGR_10905 PE=4 SV=1	690734	43170.9
902_1	tr|A0A068WEN0|A0A068WEN0_ECHGR	5.25985	NA	40867.8	VIVCEAFPNTEGHK	1	1	1	0.0379	48126	tr|W6US51|W6US51_ECHGR	Translation initiation factor eIF 2B subunit OS=Echinococcus granulosus OX=6210 GN=EgrG_000852400 PE=3 SV=1	298246	17543.9
1386_1	tr|A0A068WKU3|A0A068WKU3_ECHGR	64.8051	NA	65325.1	EAYESLAVTAR;EMVSETNMQVK;FGIEWANSQVVPK;FVPLVGGPEYVSCLLPPLEGLASTEETVVR;LAPFLDSSAMQNYVKPTLK;LATAEWFTSR;LGTDPDADVIFYAK;LSTIALALEPER;SAAINLGEMAACLGLDTLR;SLAGSFSAQALETHFIPMIER;SLLPTITQLSTDAVPNVR;VAQVLGR;VFATALAPAEAR;VSSQIAAELR;YQLADR	1;1;1;1;1;1;1;1;1;1;1;1;1;1;1	15	18	0.3616	28644;33789;43240;43194;71822;60984;26871;45571;34829;57761;57760;64144;56574;56573;2092;29075;19752;3207	tr|W6UBZ8|W6UBZ8_ECHGR	Serine:threonine protein phosphatase 2A 65 kDa OS=Echinococcus granulosus OX=6210 GN=EGR_06234 PE=4 SV=1	1.73454e+07	456458
419_1	tr|U6IZZ4|U6IZZ4_ECHGR	5.25985	NA	34892.2	TYDLGLAYTNEELLEDR	1	1	1	0.0548	58675	-	VIP36-like protein OS=Echinococcus granulosus OX=6210 GN=EGR_00479 PE=4 SV=1	373396	46674.6
11_1	tr|W6USC1|W6USC1_ECHGR	10.5197	NA	72247.7	LFGEMLASTNIK;YNLIAVQVTPLSIGHDVK	1;1	2	2	0.0467	35430;57592	-	Transmembrane 9 superfamily member OS=Echinococcus granulosus OX=6210 GN=EGR_03937 PE=3 SV=1	1.59986e+06	72721
904_1	tr|U6J3W8|U6J3W8_ECHGR	4.99062	NA	23662.3	ALYELQMK;GLGSGSLSGSDPTLK	1;1	2	2	0.1022	15477;38245	-	Tetraspanin OS=Echinococcus granulosus OX=6210 GN=EGR_04249 PE=3 SV=1	1.26225e+06	126225
145_1	tr|W6UN54|W6UN54_ECHGR	81.3626	NA	39718.2	DALTSLFHEFK;DYIHVVDLAK;FDYVIHFAALK;GCIANLEK;GGDIAVAYADTTLAEK;GLPEMCEDAWR;IIDLLDK;IIDLLDKDALTSLFHEFK;KLVYSSSCTVYGDPSK;LPLTEETPTGQCANPYGR;MQEVVVFGNDYK;RGGDIAVAYADTTLAEK;SDPEWSVINLR;SGLIGEDAGPAPK;TPDGTGIR;WQCNFPDGYPK;YFNPVGAHK;YIGELILEDLTR	1;1;1;1;1;1;1;1;1;1;1;1;1;1;1;1;1;1	18	28	0.5139	34530;34525;26253;26251;35434;35433;10448;47973;37572;6510;60867;60868;60866;53079;53076;58402;58401;40923;40999;52033;52031;34974;28765;5805;40038;17297;41261;41259	tr|A0A068WFA0|A0A068WFA0_ECHGR	UDP-glucose 4-epimerase OS=Echinococcus granulosus OX=6210 GN=EGR_02665 PE=3 SV=1	9.23962e+07	4.01723e+06
767_1	tr|W6UA22|W6UA22_ECHGR	26.9332	NA	48392.4	HPSKPDPSGVCEPELR;LHVWDLSK;LMIWDTR;PEVEGLEDCVEER;TPSADVLVFDYTK;TVALWDLR;VINEEYK	1;1;1;1;1;1;1	7	7	0.1671	53455;15588;12242;46995;42251;14330;9898	tr|A0A068WY48|A0A068WY48_ECHGR	Histone-binding protein RBBP4 OS=Echinococcus granulosus OX=6210 GN=EGR_06873 PE=4 SV=1	5.2399e+06	349327
17_1	tr|W6UYG6|W6UYG6_ECHGR	8.39416	NA	28060.4	IAYEQGAEFANLHGLHFFETSAK;TVDLDGHHIK	1;1	2	3	0.1352	67599;67598;23772	-	GTP-binding protein YPT1 OS=Echinococcus granulosus OX=6210 GN=EGR_06492 PE=4 SV=1	1.09459e+06	60810.6
15_1	tr|A0A068WKI8|A0A068WKI8_ECHGR	2.39989	NA	59203	VNVLGQHK	1	1	1	0.015	9923	-	Translation initiation factor eIF 2B subunit OS=Echinococcus granulosus OX=6210 GN=EgrG_000587900 PE=3 SV=1	0	0
849_1	tr|W6UZP6|W6UZP6_ECHGR	3.11311	NA	48402	ILALVPPWTR	1	1	1	0.0235	25804	tr|A0A068WHC8|A0A068WHC8_ECHGR	Elongator complex protein OS=Echinococcus granulosus OX=6210 GN=EGR_01130 PE=4 SV=1	45981.8	1703.03
509_1	tr|W6V1U5|W6V1U5_ECHGR	3.57287	NA	23923.7	LLVFDLER	1	1	1	0.0377	15948	tr|A0A068WKP6|A0A068WKP6_ECHGR	Adenylyltransferase and sulfurtransferase MOCS3 OS=Echinococcus granulosus OX=6210 GN=EGR_05335 PE=4 SV=1	0	0
147_1	tr|U6J7G0|U6J7G0_ECHGR	2.54732	NA	27088.9	TPEFLR	1	1	1	0.0259	3055	-	Derlin OS=Echinococcus granulosus OX=6210 GN=EGR_03081 PE=3 SV=1	1.72282e+06	344564
411_1	tr|U6J509|U6J509_ECHGR	9.4783	NA	11372.4	PVTTQPGDFIPTELQK;VDETVIVR	1;1	2	2	0.24	52550;12018	-	Uncharacterized protein OS=Echinococcus granulosus OX=6210 GN=EGR_02443 PE=4 SV=1	5.80994e+06	968323
1378_1	tr|A0A068WIM6|A0A068WIM6_ECHGR	60.5358	NA	67634.6	DSNGDLVGDLK;FYSTYGMGSGVVDLNLK;GMQTVISLNFNSVPLSHELAHPAYLIPAGSVAK;LLGTEEVPGAHLVISQQFAFNR;SLYVFK;SPEVMEK;SVGAGFVILTAMSPLYPK;SYLDSTNASAR;VAGVEVFK;VGYWVNPFSFK;VGYWVNPFSFKDSNGDLVGDLK;VLIADPGNTGYGASK;VVDEVSSETSR	1;1;1;1;1;1;1;1;1;1;1;1;1	13	16	0.2707	23675;54685;72733;72732;65773;65772;2756;5956;54694;27061;7531;36473;66161;42681;42614;28511	-	Alpha glucosidase OS=Echinococcus granulosus OX=6210 GN=EgrG_000494800 PE=4 SV=1	4.98125e+07	1.9925e+06
1446_1	tr|W6UBL4|W6UBL4_ECHGR	14.4728	NA	6749.23	HDRVEIVANDQDHR;TTPTCVAFTDK;VEIVANDQDHR	1;1;1	3	7	0.4032	50872;50874;30510;33801;33798;33864;33865	-	Heat shock cognate protein OS=Echinococcus granulosus OX=6210 GN=EGR_06337 PE=3 SV=1	1.83408e+06	458521
1318_1	tr|W6V814|W6V814_ECHGR	3.09476	NA	67038.7	RLTVDQAR	1	1	1	0.0129	13554	tr|A0A068WNA6|A0A068WNA6_ECHGR	Disks large 1 tumor suppressor protein OS=Echinococcus granulosus OX=6210 GN=EGR_02425 PE=4 SV=1	208923	8705.13
1380_1	tr|U6J887|U6J887_ECHGR	7.99589	NA	23024.6	ELQCCGFK;MPDVNCGLYVFR	1;1	2	2	0.0971	17740;42993	-	Integral membrane protein OS=Echinococcus granulosus OX=6210 GN=EGR_05083 PE=3 SV=1	0	0
1151_1	tr|W6UMK6|W6UMK6_ECHGR	20.0852	NA	78577.3	FSPDGHLYASGSEDGTVR;FWNVDNGLELLSISQSHIVR;GHFGPVHCVR;NVLAYEFDFR;SGDILETCR	1;1;1;1;1	5	5	0.0944	55741;64472;25773;32476;18230	tr|A0A068WJ13|A0A068WJ13_ECHGR	Serine-threonine kinase receptor-associated protein OS=Echinococcus granulosus OX=6210 GN=EGR_02746 PE=4 SV=1	1.3291e+06	31645.3
1382_1	tr|W6USL4|W6USL4_ECHGR	13.9762	NA	107830	FAAFLPGLSVMR;FANFYLWR;SADFTDYFSLQK;TENLFVVQR	1;1;1;1	4	4	0.0418	34595;22574;40549;21886	tr|A0A068W9Q4|A0A068W9Q4_ECHGR	Oligo-1,6-glucosidase OS=Echinococcus granulosus OX=6210 GN=EGR_03843 PE=4 SV=1	1.3272e+06	32370.8
1582_1	tr|A0A068WF70|A0A068WF70_ECHGR	19.4814	NA	51715.2	LAAEILVQNWDEALDDVEK;LDAEAWNATSR;LKDAIDCQSDDR;LLMFETFCR;SIYDGDSILR	1;1;1;1;1	5	5	0.1374	61896;30063;41272;29047;24018	tr|W6V758|W6V758_ECHGR	Eukaryotic translation initiation factor 3 subunit E OS=Echinococcus granulosus OX=6210 GN=EgrG_000619600 PE=3 SV=1	4.99064e+06	166355
1739_1	tr|A0A1P8SFY3|A0A1P8SFY3_ECHGR	8.3546	NA	9476.89	FTYSGCGGNGNR;VYGYNPSK	1;1	2	2	0.2381	33487;11819	-	Kunitz protein 4 OS=Echinococcus granulosus OX=6210 PE=2 SV=1	451978	112995
1351_1	tr|A0A068WTX0|A0A068WTX0_ECHGR	22.5144	NA	16745.4	DGKEVTNPLYDK;EVTNPLYDK;LAPSAEMLHYHYQK;SNSYVPNLVNATQPYYVQPSEDR;SNSYVPNLVNATQPYYVQPSEDRK	1;1;1;1;1	5	9	0.3333	38372;38371;20055;20054;50380;50379;68178;68177;69455	-	Expressed conserved protein OS=Echinococcus granulosus OX=6210 GN=EgrG_001100800 PE=4 SV=1	1.18692e+07	1.69561e+06
1153_1	tr|W6UUE4|W6UUE4_ECHGR	12.0256	NA	69474.7	NAGYAIDQER;STSYVQLR;TGLCLATMLTR	1;1;1	3	3	0.0483	23864;13285;30273	tr|A0A068WH96|A0A068WH96_ECHGR	Snurportin-1 OS=Echinococcus granulosus OX=6210 GN=EGR_03240 PE=3 SV=1	3.59508e+06	119836
1384_1	tr|A0A068X3N3|A0A068X3N3_ECHGR	86.0415	NA	104870	AEELQETLR;AETQIYTHLNSR;DLQSAPTTSR;GVDGGSGAYWR;IDQCIAALR;IDVVEAELEELIQASK;KQCQLILSLSPSQQSSLR;LGAIAIHQTAEK;LNESSEALTATHATITR;MVVEPALSQMLVDLAECDK;QFSHLLIDQWK;QLLELVR;SASLAQLTDFLEEVRK;SEFEHYYFTQR;SHLYGVSLFR;SIQSFAFSQVLAK;SLEYLEHYQLK;VTPAAAIALLECIR;VVGFFLVDDYLR;YYHALK	1;1;1;1;1;1;1;1;1;1;1;1;1;1;1;1;1;1;1;1	20	29	0.2604	20729;41142;41141;41196;19868;23119;18851;52948;52949;59953;31255;31254;53732;61458;40185;8683;53523;44676;44674;44675;26705;26704;40826;40632;40631;44286;44287;41646;4663	tr|W6U7N1|W6U7N1_ECHGR	Exocyst complex component OS=Echinococcus granulosus OX=6210 GN=EgrG_000301200 PE=3 SV=1	1.0992e+07	203555
1314_1	tr|W6UQV6|W6UQV6_ECHGR	13.0354	NA	59851.3	DVQPEVVEK;IMGCHDVTSR;LVGGLCGPQQLQR;NCVNLEK;NINDDAIR	1;1;1;1;1	5	6	0.0853	17799;26429;26430;40823;8999;11988	-	F-box/LRR-repeat protein 2 OS=Echinococcus granulosus OX=6210 GN=EGR_01685 PE=4 SV=1	1.1653e+06	46612
1732_1	tr|U6JIF2|U6JIF2_ECHGR	62.2572	NA	19685.1	EHGPGDPEVGEWYSLK;IGYTFDENTTDGR;KTLNVSKPVLTFAR;LEFNEGLNEILTR;LGAGYITR;SSEQPTSPTSIEELDNTNSTK;SSTIVFR;TAYITYTR;TLNVSKPVLTFAR;TVFTVDGQVLK;TVFTVDGQVLKQEQK;TVIKVEDLTCFR;VEDLTCFR;VVQPPPANGTTPSVSTAK	1;1;1;1;1;1;1;1;1;1;1;1;1;1	14	28	0.8239	53318;53319;43878;47411;47409;46526;46567;46568;46528;7646;63390;63414;63391;5432;15116;41808;41807;28475;51270;43489;43490;17640;52077;52078;52079;52075;52080;52076	-	Fatty acid binding protein FABP2 OS=Echinococcus granulosus OX=6210 GN=EGR_08627 PE=3 SV=1	9.19781e+07	6.56986e+06
734_1	tr|C6ZI52|C6ZI52_ECHGR	21.6932	NA	11612.8	GQPFQFK;GVDVEVIKPGDGTNYPK;GWDEGVAQMSLGER;KGQTVTVHYTGTLTSGK;LGMGQVIK	1;1;1;1;1	5	10	0.5833	7668;53003;53001;45982;45981;52730;52732;52731;52729;7361	-	Peptidylprolyl isomerase OS=Echinococcus granulosus OX=6210 GN=EGR_05248 PE=2 SV=1	2.95986e+07	5.91971e+06
738_1	tr|A0A068WCY3|A0A068WCY3_ECHGR	3.95308	NA	38116.1	LVISGDTIVIR	1	1	1	0.0318	27180	-	SNase domain containing protein OS=Echinococcus granulosus OX=6210 GN=EgrG_001073800 PE=4 SV=1	0	0
1159_1	tr|W6UPT0|W6UPT0_ECHGR	2.52576	NA	32111.1	QSSVLSSLR	1	1	1	0.0323	14501	-	Uncharacterized protein OS=Echinococcus granulosus OX=6210 GN=EGR_04850 PE=4 SV=1	0	0
18_1	tr|A0A068WH83|A0A068WH83_ECHGR	46.7336	NA	46451.6	DINLCSYTETLAYFESVRPTHVVHLAAK;GHVLPALIHK;HYDQPEPIILSVPETDEISIK;KADEPLLVLGSGAPLR;LALENYNLK;LIVWVLR;QFIYSIDLGR;TNMQINDNLLDACSK;VGGLFANLSDNLGFFR;VILVTGGSGLVGHGIR	1;1;1;1;1;1;1;1;1;1	10	12	0.3566	71853;20440;65736;65737;48994;20009;10130;28775;51654;51414;46022;46023	-	GDP-4-keto-6-deoxy-D-mannose-3,5-epimerase-4-reductase OS=Echinococcus granulosus OX=6210 GN=EgrG_000476900 PE=3 SV=1	7.83599e+06	391799
673_1	tr|U6ITU2|U6ITU2_ECHGR	53.1645	NA	38495.2	AAPVPYTPYDATK;AQIGGICMIMDFTNFR;DFSTDIMGK;DLMSDSYGGDNK;ILVLGSDFSPAFDAVPGLK;KLIYYNTPK;LIYYNTPK;LSFEDLCEK;SLPDARPAFAIAVDESK;STNINLNELSIADLQGPSHIWNDICLADPR;TSPTEGNPSWFEDTATNR;WLTSMPHLK;YFQECLPFR	1;1;1;1;1;1;1;1;1;1;1;1;1	13	16	0.5075	39158;55181;16312;34104;57083;57082;24112;16241;24137;52974;72427;72420;58553;22305;22303;31699	-	Alpha tocopherol transfer protein OS=Echinococcus granulosus OX=6210 GN=EGR_05518 PE=4 SV=1	2.66105e+07	1.26717e+06
1334_1	tr|A0A068WZL7|A0A068WZL7_ECHGR	3.57287	NA	67349.7	AGVTVICANDPDADR;EGFNFEETLTGFK;ETICFTEEENGK;FVYTAMHGVGAPAAQR;HLVLVEEQIKPDPEFPTVK;IFHHFGFK;MEFGTAGLR;QLDHIFDIYGK;SALELAIATANR;SQIAAMAASSHDLDK;VYWENGAQILSPHDK;YLTDNHSYLKPK;YYSELCGKPGDKR	0;0;0;0;0;0;0;0;0;1;0;0;0	1	1	0.2843	47423;45254;42353;50059;62648;62649;17302;14742;36752;36753;29802;46451;52198;43395;43398;43399;47351;47350;47353	-	Phosphoglucomutase 2 OS=Echinococcus granulosus OX=6210 GN=EGR_08839 PE=3 SV=1	1.82535e+06	46803.9
1102_1	tr|W6UJJ6|W6UJJ6_ECHGR	95.1946	NA	39305	AALFAELLHFAISGPGTR;ADTDLGTIK;AYGHPLIDAIK;CLTPCTLNQVVNPGLAESDAK;EAFEEVSGGENLEDAIK;EAYTSISSK;EKYEELYGETLEAAIK;ELYACGEGRPGTAESR;ETSGDFEHFLVTR;GIGTNEAEIIEILGGR;KETSGDFEHFLVTR;LTDEAYTR;SELSGHFR;SLIHLYTPDGEK;TLHDALK;VLNEIIAGCSK;VLNEIIAGCSKEDIPHLK;YEELYGETLEAAIK;YKPTITPTPGFSPTADAEHLK;YKPTITPTPGFSPTADAEHLKR	1;1;1;1;1;1;1;1;1;1;1;1;1;1;1;1;1;1;1;1	20	36	0.6184	55132;55131;12185;27887;63822;63824;54304;54303;14951;55499;55500;52086;52087;46133;46131;49194;49178;49816;49818;49817;14055;12117;38092;38090;4799;28289;28331;28335;59188;48777;63501;63500;63499;65785;65784;65786	tr|A0A068X163|A0A068X163_ECHGR	Annexin OS=Echinococcus granulosus OX=6210 GN=EGR_06824 PE=3 SV=1	8.51979e+07	3.54991e+06
1561_1	tr|W6U694|W6U694_ECHGR	79.6999	NA	82687.6	ADKILPNEVTDK;AHVTLALASGVPAAETGFDALR;DMAHFLK;DVYPFLLDR;EALLGSIHTFNVEGLFITK;EFHDSFFSALDVPYVR;EIGEWLVFTK;FDSECQEAAHR;FDSECQEAAHRDCEAEAK;FDVQSLAEK;FMIILR;IMDAELAHRPDVCK;LASLCGFDQDVDRDQLVTFWSSAVNPCFGSVSEPCQAVER;LFDYNVIMVIPR;RTHQNDNFVDK;SHLAGCIK;SYEYRPYTEIAR;VHLTDSDQFALWGGLDNELVDGYAPAQSRPR;WFEWFEGEHK;YGHAPDASEYAQR	1;1;1;1;1;1;1;1;1;1;1;1;1;1;1;1;1;1;1;1	20	31	0.3838	36428;36427;61819;61820;8247;23946;60231;60232;56653;56652;29367;36773;36774;61549;17491;4589;49489;49490;74199;43445;43444;38130;9430;46511;46513;72625;72624;39185;39184;42710;42711	-	2',3'-cyclic-nucleotide 3'-phosphodiesterase OS=Echinococcus granulosus OX=6210 GN=EGR_08413 PE=3 SV=1	2.6784e+07	669601
1563_1	tr|A0A068WR47|A0A068WR47_ECHGR	23.1169	NA	104623	EIFMELVK;FSAYTQEMHR;LFGGTIDEYVTK;LTAVLDYIQSK;NITALDWR;TGEQIPR	1;1;1;1;1;1	6	6	0.0589	16110;32263;36421;31210;15118;4940	tr|W6UQ19|W6UQ19_ECHGR	Slit robo rho gtpase activating protein 1 OS=Echinococcus granulosus OX=6210 GN=EgrG_000230400 PE=4 SV=1	5.86287e+06	117257
1358_1	tr|W6USN1|W6USN1_ECHGR	26.4004	NA	51192.4	IHLQSLLDFVTEKEEK;KPQAVYVFSSK;LVLGGYVHVPAK;SSIELFSHR;SVCQVLTGTLEETK;TLTPVFLNLYGK	1;1;1;1;1;1	6	8	0.1637	56679;56678;31364;31365;31311;19873;47146;37720	-	Aldehyde dehydrogenase OS=Echinococcus granulosus OX=6210 GN=EGR_03672 PE=3 SV=1	1.01126e+06	56180.9
469_1	tr|A0A068WQX1|A0A068WQX1_ECHGR	48.336	NA	75729.1	ALGPSVLR;DPLNPAK;ETGYDVLSTVIQNQGCEGSGEGNISDYIR;FLHNLVDCIPSVR;IEGHLESTIVPR;LPEMDSHYEYR;MYLDFAEK;QLDDIVDQPVDSK;SSLTLFHDTAGWK;VLQGANDPELEK;VPTTLLDAHNFR	1;1;1;1;1;1;1;1;1;1;1	11	12	0.2035	5573;2691;71542;47292;36866;41437;16469;43051;42607;42606;34809;38643	tr|W6URE1|W6URE1_ECHGR	Armadillo type fold OS=Echinococcus granulosus OX=6210 GN=EgrG_000222600 PE=4 SV=1	7.89903e+06	161205
671_1	tr|W6VBI5|W6VBI5_ECHGR	8.83272	NA	18898.5	DWHGTGFEIK;MNNEYHLADTDTTR	1;1	2	2	0.1412	27399;50199	tr|A0A068WBH9|A0A068WBH9_ECHGR	CD151 antigen OS=Echinococcus granulosus OX=6210 GN=EGR_00733 PE=4 SV=1	746749	93343.7
1100_1	tr|A0A068WBF6|A0A068WBF6_ECHGR	8.67889	NA	105836	INEILDELGLTK;LYLDDLGYASR	1;1	2	2	0.0239	37262;33223	tr|W6UN18|W6UN18_ECHGR	ATP-binding cassette sub-family G member 2 OS=Echinococcus granulosus OX=6210 GN=EgrG_000976200 PE=3 SV=1	116408	2476.77
1736_1	tr|A0A068WTE1|A0A068WTE1_ECHGR	48.1762	NA	66401.6	EWVVLDAISFK;IGYASLLQSCYK;KLSLASPLFAR;KYTYQAENR;LGGALESDR;LNSPPEELK;LPSASLISSR;LSLASPLFAR;QITLDVLR;REWVVLDAISFK;VEFQQTLEK;VGHLLEIAR;YFNEGLIAAQADQIVLR	1;1;1;1;1;1;1;1;1;1;1;1;1	13	13	0.1976	34488;39633;28237;26225;11249;16970;17208;19839;13508;42631;22942;16083;56479	-	TBC1 domain family B OS=Echinococcus granulosus OX=6210 GN=EgrG_000523200 PE=4 SV=1	1.6452e+07	514125
467_1	tr|A0A068WCI3|A0A068WCI3_ECHGR	67.2647	NA	68103.2	AAFTHPQFATDVLKPLQMER;ADIYMFDEPSSYLDVK;AVSKPQYVDQIPK;FLQALNITFR;FRDTPLIFK;GNQDEILDILDLK;HKDPPDWTEILTYFR;IAIVSSDK;KCPFQAITIINLASNLESQITHR;KTAFVVEHDFIMATYLADR;LAFISEELCIGCGICVK;LCIEVTPQDK;MLAGNLKPDEGVK;QVSELSGGELQR;TVQNLLYEK;VSETGNEEEIKR	1;1;1;1;1;1;1;1;1;1;1;1;1;1;1;1	16	18	0.3626	64034;64033;55656;43116;29432;23896;43708;56399;6675;68330;62781;57628;28215;38029;34191;22025;39003;38996	-	ATP binding cassette sub family E OS=Echinococcus granulosus OX=6210 GN=EgrG_001052900 PE=4 SV=1	1.60819e+07	446718
1356_1	tr|U6J837|U6J837_ECHGR	11.6056	NA	25791.3	INLIYGTICDR;KFEYHWR;RPPDEELNDWIAVHVVDFYNR	1;1;1	3	5	0.1797	36158;19205;19206;67614;67613	-	Mps one binder kinase activator 2a OS=Echinococcus granulosus OX=6210 GN=EGR_06045 PE=4 SV=1	3.4295e+06	311773
1106_1	tr|A0A068X2G9|A0A068X2G9_ECHGR	2.59625	NA	71982.5	FGVVIGVR	1	1	1	0.0124	7431	tr|W6UCZ8|W6UCZ8_ECHGR	Expressed protein OS=Echinococcus granulosus OX=6210 GN=EgrG_000313600 PE=4 SV=1	1.30894e+07	344458
1730_1	tr|W6UTL7|W6UTL7_ECHGR	10.5197	NA	11165.9	ESTCYNCGEVGHFAR;SDVQCYNCQGYGHISR	1;1	2	7	0.2952	52954;52981;52955;52982;57010;57011;57040	-	DNA-binding protein HEXBP OS=Echinococcus granulosus OX=6210 GN=EGR_00593 PE=4 SV=1	194968	24370.9
313_1	tr|A0A068WV98|A0A068WV98_ECHGR	77.0244	NA	36414.3	ADAEAVAEAFK;ADTHGDYQQFLLAILR;AGFGESLK;AMSGISTHDK;DVLLDIFTNR;GLQLILEAATDR;ICLLSSFDDQSHADAR;ILYDSMK;KDVLLDIFTNR;KTDEVYAESFGHGLYEAVEK;LAYQDILQEENKDNK;MGTDDSTFIR;MIVGHSETDLALIR;NLEGDLK;RSETVDPQIASIDAK;SLILNAYK;TLMEVICTSTNQEIR	1;1;1;1;1;1;1;1;1;1;1;1;1;1;1;1;1	17	19	0.6	22926;54901;5372;17984;28397;34038;54248;8612;35979;35981;63511;53898;24263;46806;4363;48814;48815;11528;53205	tr|W6UF57|W6UF57_ECHGR	Annexin OS=Echinococcus granulosus OX=6210 GN=EgrG_000111500 PE=3 SV=1	2.85624e+07	1.1901e+06
1517_1	tr|A0A068WN06|A0A068WN06_ECHGR	10.5197	NA	29681.1	LAAALGNLTIIR;TIFGTGPSDDPQETSK	1;1	2	2	0.1007	29598;50165	tr|W6V8H6|W6V8H6_ECHGR	ATP-dependent (S)-NAD(P)H-hydrate dehydratase OS=Echinococcus granulosus OX=6210 GN=EgrG_000434000 PE=3 SV=1	212578	17714.8
315_1	tr|U6IZU7|U6IZU7_ECHGR	10.7567	NA	31520	ALINAFK;ALNLNLVSGR;AVELFPDDLR	1;1;1	3	3	0.0944	3786;18636;26387	-	General transcription factor TFIIB OS=Echinococcus granulosus OX=6210 GN=EGR_00532 PE=3 SV=1	3.06302e+06	153151
317_1	tr|A0A068WYM6|A0A068WYM6_ECHGR	125.925	NA	169912	ADATFVLNTVNR;AGRPDQDQSDLYR;AYHVTAIRPGGEPCEWLRPEDAVR;EFYELFR;ETESIALPTTK;EVASPITGLFAPVSFAIR;EVLTTTSSVTEPLTPK;EYSSAVEEVEK;FANTASPNGNFTSSLVYIER;FTDTQVVETQTER;GHYSGEQSSTWSR;HDCLHDLDIMTYFFDQDAHEEEYLQR;HEFEEIHAYEDSSR;IYDQESDEEVMWR;LLSTSISLLSSR;LTEVTSGLAEVSAAVLLIK;LVPEMNINK;QGWIQLGGQNEYIDPTTGHAIPLETALAQGR;QQLEGLSKPEAK;QTGDVAVDWPSRPSYQPFESGK;SEQSVEESYTMR;SGRPQVVVR;SQHYTGQVGEQTR;TPPPEFAVSQWCNFLTAR;TVLQDIS…	1;1;1;1;1;1;1;1;1;1;1;1;1;1;1;1;1;1;1;1;1;1;1;1;1;1;1;1	28	39	0.2727	35318;45356;45357;69571;69572;69570;15871;27420;55236;50846;32266;62136;62134;46752;43516;72274;72273;51947;50715;32672;56326;56325;18698;72247;72246;35642;35641;66094;41764;15598;43925;43926;60945;60944;60217;60218;9439;2174;42257	-	Uncharacterized protein OS=Echinococcus granulosus OX=6210 GN=EgrG_000573000 PE=4 SV=1	2.08586e+07	274455
1580_1	tr|W6UU84|W6UU84_ECHGR	11.6006	NA	36594.4	EAFAGPQPR;ESSNTTAPPYPSVPASK;STGASFGK	1;1;1	3	3	0.1024	14256;51547;2649	-	Secretory carrier-associated membrane protein OS=Echinococcus granulosus OX=6210 GN=EGR_00760 PE=3 SV=1	1.72242e+06	172242
1657_1	tr|C6KI53|C6KI53_ECHGR	60.641	NA	23035.8	AFLTLAR;CHVPYLETSAK;ISFGSEDVQLHILDTAGQEDYAGIR;ISFGSEDVQLHILDTAGQEDYAGIRDTFYR;KCHVPYLETSAK;KISFGSEDVQLHILDTAGQEDYAGIR;LIVAGVGGVGK;QSFISLGEFVDQILR;RVSQEEAEDFCR;SDRVPMLICGNK;TQQQQQQNFVK;VDLTENRR;VPMLICGNK;VSQEEAEDFCR;VSQEEAEDFCRK	1;1;1;1;1;1;1;1;1;1;1;1;1;1;1	15	22	0.59	4542;34317;34318;69157;69158;69189;72582;41152;41150;41151;41153;70093;14130;52081;45604;45602;38948;38281;15832;17247;37896;44245	-	Ral protein OS=Echinococcus granulosus OX=6210 GN=EgrG_000807900 PE=2 SV=1	5.9892e+07	3.9928e+06
1276_1	tr|U6J6Y3|U6J6Y3_ECHGR	15.7694	NA	62675.3	DDQLYCSDCYDER;ECFTCTSCGK;FANTCEQCK;FISFEDR;SCDVSLTGQR	1;1;1;1;1	5	5	0.0888	51686;31086;25254;10997;22981	-	Four and a half LIM domains protein 2 OS=Echinococcus granulosus OX=6210 GN=EGR_09187 PE=4 SV=1	4.75698e+06	121974
58_2	tr|A0A068WF60|A0A068WF60_ECHGR	20.7721	NA	196482	ELSIPYRPR;EVDSYYHR;IQTWNAIGPSK;LNSGLWR;NPNIICCVHR;QHKPFTSEVTPQLR;WLGPPR	1;1;1;1;1;1;1	7	7	0.0365	23514;19367;28969;7347;33028;49873;1257	-	Ceramide kinase OS=Echinococcus granulosus OX=6210 GN=EgrG_000868200 PE=4 SV=1	4.21008e+06	51976.4
1552_1	tr|W6ULR0|W6ULR0_ECHGR	45.2585	NA	39851.9	AQQWCQAK;ATIGADFLTK;DPENFPFILIGNK;FQSLGVAFYR;QAFQEVAR;RAQQWCQAK;TLDSWRDEFLIQASPR;TSLMNQYVTQR;VALAQETEPDTVNDCPEQIHLGASR;VIILGDSGVGK;VVTLQIWDTAGQER	1;1;1;1;1;1;1;1;1;1;1	11	13	0.3629	16629;17517;44560;27300;27296;13020;26450;56796;36306;69333;18715;18714;48500	tr|A0A068WRI1|A0A068WRI1_ECHGR	Ras-related protein Rab-7a OS=Echinococcus granulosus OX=6210 GN=EGR_06079 PE=4 SV=1	3.86375e+07	1.33233e+06
58_1	tr|A0A068WD10|A0A068WD10_ECHGR	10.5197	NA	84555.6	FDHSIVFVSVYDAYASLQQLHQHI;TLYSQLEFDNLYLK	1;1	2	3	0.0495	69853;69852;51912	-	Solute carrier family 26 prestin OS=Echinococcus granulosus OX=6210 GN=EgrG_000868450 PE=3 SV=1	198953	7958.13
638_1	tr|A0A068X2Z0|A0A068X2Z0_ECHGR	23.351	NA	169272	ELPDVLLISIK;ELSGSFVGLK;ELYDTVEK;SLWHTFVQK;VNDTQYSEVR;VSPTVGVITDTGVPK	1;1;1;1;1;1	6	6	0.0425	30495;17518;15524;24499;28686;42977	-	Ubiquitin carboxyl terminal hydrolase 4 OS=Echinococcus granulosus OX=6210 GN=EgrG_000915300 PE=4 SV=1	1.34943e+06	14056.6
416_1	tr|A0A068W7A1|A0A068W7A1_ECHGR	5.25985	NA	8395.37	LVDEISSNVER	1	1	1	0.1447	31768	-	Expressed protein OS=Echinococcus granulosus OX=6210 GN=EgrG_000749300 PE=4 SV=1	1.27715e+06	255431
1511_1	tr|U6JQ01|U6JQ01_ECHGR	7.7618	NA	12583	GPDGIPFR;VTDPSQIPNEYSTTPGGSIFSTTPGGTR	1;1	2	3	0.3077	8047;70153;70150	-	Eukaryotic translation initiation factor 4E OS=Echinococcus granulosus OX=6210 GN=EGR_08339 PE=3 SV=1	1.42167e+06	236946
1389_1	tr|A0A068WK92|A0A068WK92_ECHGR	5.25985	NA	116787	VSLTTLSTLLSR	1	1	1	0.0113	33548	-	Ensconsin Microtubule associated protein 7 OS=Echinococcus granulosus OX=6210 GN=EgrG_000669500 PE=4 SV=1	412512	7366.29
1676_1	tr|A0A068WYG8|A0A068WYG8_ECHGR	3.81102	NA	14070.2	TLLPYYLVHPGR	1	1	1	0.096	40968	-	Palmitoyltransferase ZDHHC14 (Fragment) OS=Echinococcus granulosus OX=6210 GN=EgrG_002010500 PE=4 SV=1	114737	16390.9
56_1	tr|W6U877|W6U877_ECHGR	30.1643	NA	56656.3	DTNVLLHSDGSIK;GAEPYNGQEK;KIADGMAYLEK;NPLTFEIGR;SLDPSICVR;TNAQSNVAHYK;VGGLAVFTTK;VIGTGDFANVYCGSWHAEEAAVK	1;1;1;1;1;1;1;1	8	10	0.1897	39409;39406;21066;30409;30407;18008;17992;30007;15341;66449	tr|A0A068WE77|A0A068WE77_ECHGR	Tyrosine-protein kinase OS=Echinococcus granulosus OX=6210 GN=EGR_10535 PE=3 SV=1	2.91152e+07	1.03983e+06
1219_1	tr|A0A068WQA0|A0A068WQA0_ECHGR	5.25985	NA	55519.4	AANVLVHEDR;AVLAVYDFK;VYFDEAAR	0;1;0	1	1	0.0564	23078;16932;14144	-	Tyrosine-protein kinase (Fragment) OS=Echinococcus granulosus OX=6210 GN=EgrG_000515100 PE=3 SV=1	460522	15880.1
1219_2	tr|W6UHB2|W6UHB2_ECHGR	6.79204	NA	63242.9	AANVLVHEDR;EYTCEQVR;VYFDEAAR;WTAPEVLIHR	0;1;0;1	2	2	0.0664	23078;20402;14144;29374	-	Tyrosine-protein kinase OS=Echinococcus granulosus OX=6210 GN=EGR_07694 PE=3 SV=1	262156	8192.39
1513_1	tr|A0A068WVX6|A0A068WVX6_ECHGR	2.2517	NA	46686.2	LLSRPDLGVTFTK	1	1	1	0.0315	41844	tr|W6URQ0|W6URQ0_ECHGR	Glycogenin 1 OS=Echinococcus granulosus OX=6210 GN=EgrG_000194000 PE=4 SV=1	6.92304e+06	346152
414_1	tr|W6VD62|W6VD62_ECHGR	15.4929	NA	46719	AIKDEHLDETK;GSHLIVSQQQLSQQSSTSR;MLIEVK;STNTINGEASSVK	1;1;1;1	4	4	0.1189	33985;59900;1622;34573	-	Uncharacterized protein OS=Echinococcus granulosus OX=6210 GN=EGR_00158 PE=4 SV=1	267060	11127.5
412_1	tr|W6UAJ3|W6UAJ3_ECHGR	21.2317	NA	17376.1	GAQIFDVR;LISGDVTFNPNINVK;TLNLDGGYVAWK;VTDDNIIFVCR;YGVPKPK	1;1;1;1;1	5	5	0.3442	10593;48842;36111;36926;4387	tr|A0A068WGE4|A0A068WGE4_ECHGR	Thiosulfate sulfurtransferase/rhodanese-like domain-containing protein OS=Echinococcus granulosus OX=6210 GN=EGR_07562 PE=4 SV=1	9.44793e+06	787328
1515_1	tr|A0A068WY13|A0A068WY13_ECHGR	3.01965	NA	212233	VFFPLLR	1	1	1	0.0037	9783	tr|W6UZ33|W6UZ33_ECHGR	Dicer 1 OS=Echinococcus granulosus OX=6210 GN=EGR_06278 PE=4 SV=1	15554.2	138.877
561_1	tr|W6UIF3|W6UIF3_ECHGR	12.1452	NA	19127.7	MLYASSVDALK;NCTFDQFK;SHLLFISWIPDNASVR;SYLQLNEK	1;1;1;1	4	4	0.259	27866;18813;54760;15436	-	Cofilin/actin-depolymerizing factor OS=Echinococcus granulosus OX=6210 GN=EGR_03925 PE=3 SV=1	7.09158e+06	590965
1554_2	tr|W6UFB0|W6UFB0_ECHGR	9.4783	NA	184519	AIETMVGIK;ATISHASSFVSNGIANGR;ELNDMIR;ESSEHVVGLLSAVGYQSLISVSK;EVGVQYDR;IVATPLGQDPQFSLISK;IYAEVLDTIER;LDEPVVGYFK;LLGYLGVR;LVNRPEVIQGIQQGR;NILLALTR;SDFVVNSLVAEQWK;SLIGDAVGGTADFLNTSPPR;SLQTLNAQKPNILGPLHEAINSLK;VLNEFIQQTDDK;VLNEFIQQTDDKIYAEVLDTIER;VSYAEAFGK	0;0;0;0;0;0;1;0;0;0;0;0;0;0;0;1;0	2	2	0.1264	13719;53078;53047;53048;9698;65268;13902;53705;35323;25854;9740;50960;11041;48654;48633;48656;57990;57992;67776;41961;69347;14201	-	Uncharacterized protein OS=Echinococcus granulosus OX=6210 GN=EGR_05598 PE=3 SV=1	1.38131e+06	19184.9
1554_1	tr|A0A068WS30|A0A068WS30_ECHGR	5.25985	NA	94977	AIETMVGIK;ATISHASSFVSNGIANGR;ELNDMIR;ESSEHVVGLLSAVGYQSLISVSK;EVGVQYDR;IVATPLGQDPQFSLISK;IYAEVLDAIER;LDEPVVGYFK;LLGYLGVR;LVNRPEVIQGIQQGR;NILLALTR;SDFVVNSLVAEQWK;SLIGDAVGGTADFLNTSPPR;SLQTLNAQKPNILGPLHEAINSLK;VLNEFIQQTDDK;VSYAEAFGK	0;0;0;0;0;0;1;0;0;0;0;0;0;0;0;0	1	1	0.2451	13719;53078;53047;53048;9698;65268;13902;53705;33586;25854;9740;50960;11041;48654;48633;48656;57990;57992;67776;41961;14201	-	Uncharacterized protein OS=Echinococcus granulosus OX=6210 GN=EgrG_001115400 PE=4 SV=1	826283	20657.1
1633_1	tr|W6U9D8|W6U9D8_ECHGR	3.19749	NA	215578	WEAIECILGR	1	1	1	0.0051	30872	-	NEDD8-activating enzyme E1 catalytic subunit OS=Echinococcus granulosus OX=6210 GN=EGR_07170 PE=3 SV=1	273241	3214.6
1593_1	tr|W6UIW7|W6UIW7_ECHGR	3.07941	NA	59899.7	ILNDLAR	1	1	1	0.0128	5669	tr|A0A068WND8|A0A068WND8_ECHGR	Clathrin interactor OS=Echinococcus granulosus OX=6210 GN=EGR_04134 PE=4 SV=1	701543	29231
1670_1	tr|U6IXW9|U6IXW9_ECHGR	13.4854	NA	44316.8	ESPIGSLK;GQILSDELPLK;GVKPLAVIWR;LLGLVVER	1;1;1;1	4	4	0.0964	6554;28861;24049;10126	-	Ubiquitin-like domain-containing CTD phosphatase 1 OS=Echinococcus granulosus OX=6210 GN=EGR_08369 PE=4 SV=1	1.15581e+06	50252.6
1556_1	tr|U6J242|U6J242_ECHGR	13.4565	NA	24385.2	IQIWDTAGQER;TSFGAVEQWLGDAR;VISVDGTHVK	1;1;1	3	5	0.157	35046;35041;35043;46092;18506	-	Putative Ras-related protein Rab-4A OS=Echinococcus granulosus OX=6210 GN=EGR_00850 PE=4 SV=1	2.22987e+06	222987
326_1	tr|U6ITH9|U6ITH9_ECHGR	13.5548	NA	28747.4	LFATAIIR;LLYVDTVDK;SGGFDWSEGTNK	1;1;1	3	3	0.1151	10562;19234;33130	-	Folate receptor beta OS=Echinococcus granulosus OX=6210 GN=EGR_03832 PE=3 SV=1	3.16758e+06	186328
356_1	tr|W6U8C0|W6U8C0_ECHGR	138.881	NA	115013	AAASSIVSGSK;AAGWGVMVSHR;AAVPSGASTGVHEAVELR;ACNALLLK;AGIQIVGDDLTVTNPER;AVYAGEHFR;DADKNAYMGK;DVVLPVPSFNVLNGGSHAGNK;EKFVVTDQQR;FVVTDQQR;GKYGLDACNVGDEGGFAPNIQDNMEGLELLK;GNPTVEVDLTTSK;GVPLYR;HVADLAGNK;HVADLAGNKDVVLPVPSFNVLNGGSHAGNK;IDEFMIK;IEEELGPK;IGMDVAASEFYQDGNYNLDFK;IGMDVAASEFYQDGNYNLDFKNPK;LAMQEFMILPTGAK;LGANAILGVSLAVCK;LSDIYSEMISK;MGTEVYHHLK;NVNEVIAPALIK;SFSEAMK;SGETEDSTIADIVVGLR;VNQIGSVTESIK;VQ…	1;1;1;1;1;1;1;1;1;1;1;1;1;1;1;1;1;1;1;1;1;1;1;1;1;1;1;1;1;1	30	46	0.3057	14537;14539;26103;26104;52040;52037;10357;10416;53295;53296;18164;18166;22279;60967;60965;60966;60968;31130;31129;15322;72182;37401;318;11675;70981;9962;11063;65371;65370;69186;46598;43717;33220;28946;28945;33002;33003;32943;4876;52293;52294;32559;32618;6493;71460;5277	tr|D0VLV3|D0VLV3_ECHGR	2-phospho-D-glycerate hydro-lyase OS=Echinococcus granulosus OX=6210 GN=EGR_07685 PE=3 SV=1	3.20216e+08	5.16477e+06
1595_1	tr|W6V0K4|W6V0K4_ECHGR	53.6215	NA	44647	AGFAGDQTPR;EGTDLHTTAEFEIVR;EQLTVSSEEHPVLLTEAPLNPK;HEYESEGPAVLHR;HYFPNFIGRPK;LPDGSALQIGPAR;MLYENIVLSGGSTLLK;NMWVSK;SCFVSLSPGK;TTGVVLDSGDGVTHAAPIYEGYALPHSIER;VEAVEAQEFYR;YPIEHGIVR	1;1;1;1;1;1;1;1;1;1;1;1	12	14	0.4224	16633;51211;65824;45495;45496;38248;33761;51684;3159;20237;71408;71409;36305;20371	-	Beta-centractin OS=Echinococcus granulosus OX=6210 GN=EGR_00966 PE=3 SV=1	1.81403e+07	788709
1672_1	tr|A0A068WWN8|A0A068WWN8_ECHGR	10.1679	NA	32331.1	AFNEGHEIYR;HFLALTVK;NTYYPGETAVPR	1;1;1	3	3	0.1031	30190;11910;37791	-	Expressed protein OS=Echinococcus granulosus OX=6210 GN=EgrG_000304300 PE=4 SV=1	398692	20983.8
818_1	tr|A0A068W7V0|A0A068W7V0_ECHGR	7.9889	NA	32518.2	AVLEYALR;SVVLPVATFAK	1;1	2	2	0.0644	12257;23604	tr|W6UUN6|W6UUN6_ECHGR	Ubiquitin fusion degradation protein 1 OS=Echinococcus granulosus OX=6210 GN=EGR_00257 PE=3 SV=1	265704	13984.4
1550_1	tr|U6J753|U6J753_ECHGR	11.7684	NA	82679.2	AHIDYTGGGVR;SDDYFDIVER;VGWPLVFPGR	1;1;1	3	3	0.0432	24489;31633;23355	-	Procollagen lysine2 oxoglutarate 5 dioxygenase OS=Echinococcus granulosus OX=6210 GN=EGR_02416 PE=4 SV=1	2.72728e+06	66519.1
328_1	tr|A0A068WQG5|A0A068WQG5_ECHGR	3.57287	NA	26607.9	SIVQQLLSK	1	1	1	0.036	16458	tr|A0A068WRE7|A0A068WRE7_ECHGR;tr|W6UJC1|W6UJC1_ECHGR;tr|A0A068WXH9|A0A068WXH9_ECHGR	Tetraspanin OS=Echinococcus granulosus OX=6210 GN=EgrG_000354700 PE=4 SV=1	257267	32158.4
1674_1	tr|A0A068WNH8|A0A068WNH8_ECHGR	2.76792	NA	83543.4	QPPLSSVAEVMLDNVTSSASVVTTVLPASGLSAEGGNETFTSDGPELPMLPTRSR	1	1	1	0.0732	75345	-	26s proteasome regulatory particle subunit OS=Echinococcus granulosus OX=6210 GN=EgrG_000223550 PE=4 SV=1	680635	17452.2
569_1	tr|U6JME9|U6JME9_ECHGR	90.0865	NA	110993	ACPPGTVPGNGEK;ADDIGTDFHLFFQTK;CLIDLHPETSTGQR;CVLDGGR;DASGVGTYLR;DEVPVFGVR;FTTEGAK;GFGWKPEGTYLLGTTNTLCVSELTLENK;GSEATQFK;GSTFGPVIFR;KPDLQSTCINSNK;LTDPLSLAYFTVR;SAFESSDSAANQGTECGIPEDEKELELSPHQLVK;SHLLLPNYK;STTSACPGGINTIVTLR;VCSVSDAPK;WDEPGSELDPNTR;WNQLTASSIGDSR;YDLDELLSSK;YISPLPGTK	1;1;1;1;1;1;1;1;1;1;1;1;1;1;1;1;1;1;1;1	20	32	0.2564	33138;52128;52129;48739;3752;17604;16530;2608;71420;8502;20193;44606;44610;44607;44609;44647;44651;44175;44177;73347;73348;20432;20431;20484;20430;20485;51936;13745;45100;41247;26931;14442	-	Expressed protein OS=Echinococcus granulosus OX=6210 GN=EGR_07945 PE=4 SV=1	7.9239e+07	1.44071e+06
1635_1	tr|W6UBS1|W6UBS1_ECHGR	2.05071	NA	18533.3	RTLPPR	1	1	1	0.0357	1945	tr|A0A068X063|A0A068X063_ECHGR	Uncharacterized protein OS=Echinococcus granulosus OX=6210 GN=EGR_06262 PE=4 SV=1	762138	76213.8
1095_1	tr|A0A068WS70|A0A068WS70_ECHGR	24.0627	NA	26680.5	AMEDGDLAFR;DSLPTNPQVAR;GQNWLAATNPR;GYSAALDAFR;IYFSGTDPNCFLFVNK;LLQSNDYSSNFNYVIRPSR	1;1;1;1;1;1	6	6	0.3263	23117;27870;29674;19501;56488;63551	-	Tyrosine protein kinase Src42A OS=Echinococcus granulosus OX=6210 GN=EgrG_001116400 PE=4 SV=1	5.45251e+06	320736
51_1	tr|A0A068WMV9|A0A068WMV9_ECHGR	2.86316	NA	80541.2	APFEQAGPIR	1	1	1	0.0134	20473	tr|W6U887|W6U887_ECHGR	Expressed conserved protein OS=Echinococcus granulosus OX=6210 GN=EgrG_000510500 PE=4 SV=1	0	0
148_9	tr|A0A068WZC1|A0A068WZC1_ECHGR	5.25985	NA	18842.6	ADIHEILLVGGSTR;AEFEQLCMDLFSQTMDK;LMENLMLYEVTPLSLGWK;MLSSAASTK;VQSMLQEFFNGR;VVVESLFDEVDFCK	0;0;1;0;0;0	1	1	0.5	43502;43501;60281;60282;61228;9960;42302;42303;50336;50338	-	Heat shock protein 70 (Fragment) OS=Echinococcus granulosus OX=6210 GN=EgrG_002068800 PE=3 SV=1	114172	9514.37
148_8	tr|A0A068X088|A0A068X088_ECHGR	5.25985	NA	60773.2	ADIHEILLVGGSTR;AVGGDTHLGGEDITSR;CEEMIK;HWPFK;IDKADIHEILLVGGSTR;LVDHCVEK	0;0;0;0;1;0	1	3	0.0958	43502;43501;47708;5410;713;714;712;709;54318;54317;54316;15670	-	Heat shock protein 70 OS=Echinococcus granulosus OX=6210 GN=EgrG_002039100 PE=3 SV=1	3.87838e+06	107733
1453_1	tr|W6UTT6|W6UTT6_ECHGR	13.2876	NA	17729.2	AFNWFLK;LASEHGANLIIVGSR;YTHGNAVIALDNLINIPVQDGSVSVDDGQR	1;1;1	3	4	0.3171	11726;46111;46110;71622	tr|A0A068W760|A0A068W760_ECHGR	Usp domain-containing protein OS=Echinococcus granulosus OX=6210 GN=EGR_00309 PE=4 SV=1	2.50868e+06	313585
148_5	tr|W6UBS2|W6UBS2_ECHGR	15.7768	NA	33929.4	ADIHEVVLVGGSTR;KLENEEVK;LLDYIYSIK;LLGEFLLSGLPLAPR;LSEEEIEK	1;1;1;1;1	5	5	0.1794	42120;15126;23356;48011;14484	-	Heat shock cognate protein OS=Echinococcus granulosus OX=6210 GN=EGR_09244 PE=3 SV=1	4.27153e+07	2.37307e+06
534_1	tr|W6UYE1|W6UYE1_ECHGR	3.06516	NA	16581	VWISMPGDIYIR	1	1	1	0.0789	41971	-	Amino acid transporter OS=Echinococcus granulosus OX=6210 GN=EGR_01270 PE=3 SV=1	66128.4	7347.6
148_7	tr|A0A068X521|A0A068X521_ECHGR	15.7795	NA	27183.8	FDDKVVQSDMK;HWPFK;ITPSCVAFTDEER;LIGEAAINQAAMNLANTVFDVK;VDIIANDQGNR;VVQSDMK	0;0;1;1;1;0	3	9	0.25	34735;713;714;712;709;45568;45569;64113;64112;28949;28994;28995;28998;28997;5258	-	Heat shock protein (Fragment) OS=Echinococcus granulosus OX=6210 GN=EgrG_002054100 PE=3 SV=1	7.97041e+06	569315
148_6	tr|U6J3P2|U6J3P2_ECHGR	10.5197	NA	68277.1	FELSGIPPAPR;IAGLNVLR;NLETLYSSIISTK;QNSITITK;STDGDTHLGGEDFDSR;VQELLQDFFK	0;0;1;0;0;1	2	2	0.1073	27022;27019;27029;27027;27020;27017;27026;27025;27024;27028;27031;27030;7899;7902;7903;7948;42939;10604;50985;32133	-	Heat shock cognate protein OS=Echinococcus granulosus OX=6210 GN=EGR_08097 PE=3 SV=1	336662	8632.36
148_1	tr|A0A068X4F0|A0A068X4F0_ECHGR	2.84517	NA	44059.8	HWPFK;NPTNTVFNVK	0;1	1	1	0.0377	713;714;712;709;23771	-	Heat shock protein 70 OS=Echinococcus granulosus OX=6210 GN=EgrG_000314700 PE=3 SV=1	0	0
148_3	tr|A0A068WYH1|A0A068WYH1_ECHGR	9.69306	NA	59800.7	AVGGDTHLGGEDIDSR;HFVAEEISSMVLSK;LINEPTAAAIAYGINTR;VEIIANDQGNR	1;1;1;0	3	4	0.107	48070;48069;47923;53029;29730;29772;29729;29773;29844;29731	-	Heat shock protein 70 OS=Echinococcus granulosus OX=6210 GN=EgrG_000520950 PE=3 SV=1	2.9153e+06	91103.2
148_2	tr|C3VX20|C3VX20_ECHGR	5.25985	NA	4713.31	AVGIDLGTTFSCVGVFQHGK;TTPSYVAFTDTER;VEIIANDQGNR	1;0;0	1	2	1	60292;60291;43788;43787;29730;29772;29729;29773;29844;29731	-	Heat shock protein 70 (Fragment) OS=Echinococcus granulosus OX=6210 PE=2 SV=1	0	0
1631_1	tr|W6V411|W6V411_ECHGR	40.5748	NA	53951.5	AVVGEEALSAEDLLYLEFLSK;AVVQVFEGTSGIDAK;FFMQDFK;HVLVILTDMSSYAEALR;IALTTAEYLAYQCEK;IPIFSASGLPHNEIAAQICR;KAVVQVFEGTSGIDAK;NTTCEFTGDVLR;TAVSEDMLGR	1;1;1;1;1;1;1;1;1	9	10	0.2433	63971;45385;13738;56402;56401;52612;62243;49377;40080;20050	tr|A0A068WHQ1|A0A068WHQ1_ECHGR	Vacuolar proton pump subunit B OS=Echinococcus granulosus OX=6210 GN=EGR_04253 PE=3 SV=1	7.96315e+06	256876
1097_1	tr|W6U228|W6U228_ECHGR	11.8216	NA	19794.4	FEYLDHTADVQLHAWGADTK;ITEFDRENFHIK;SVEGDVPPIPEQK	1;1;1	3	4	0.2601	64313;64312;46566;39210	-	Protein archease OS=Echinococcus granulosus OX=6210 GN=EGR_09990 PE=3 SV=1	703127	63920.7
678_1	tr|A0A068WYA6|A0A068WYA6_ECHGR	52.6814	NA	26549.5	AIGSGSEGAQQALQEVFNR;DGVILAVEK;DITLEEACVQALTILR;GGITIFDK;GQLENVISR;GVNTFSPDGR;IACAVSGLVADAR;INSPLIVTNSVEK;LDATNVEMASVTR;LFQVEYAIEATK;LGSTGIGIK;TKDGVILAVEK	1;1;1;1;1;1;1;1;1;1;1;1	12	15	0.5451	57470;57471;12736;54555;54553;7639;16433;18152;34201;40157;39810;40065;7369;26272;26270	-	Proteasome subunit alpha type OS=Echinococcus granulosus OX=6210 GN=EgrG_001182700 PE=3 SV=1	2.43899e+07	1.87615e+06
536_1	tr|W6VC11|W6VC11_ECHGR	10.5911	NA	98341	DLAEQVAAQK;SLEFWQHR;VSWDENVLR	1;1;1	3	3	0.0304	19669;21634;22659	tr|A0A068WHX1|A0A068WHX1_ECHGR	Rho GTPase-activating protein OS=Echinococcus granulosus OX=6210 GN=EGR_00938 PE=4 SV=1	8.29022e+06	202200
676_1	tr|A0A068WFE3|A0A068WFE3_ECHGR	36.7483	NA	33990.6	GHATFQWR;GPSVGEFIFK;ICVWLISNTR;KLAHVGDCVEMIVDFHSAVK;LAHVGDCVEMIVDFHSAVK;LVSPPEDPHCDAAR;RICVWLISNTR;TITSMDCGPWTCR	1;1;1;1;1;1;1;1	8	19	0.2452	15820;15818;20186;31828;31925;63199;63200;63202;63198;61046;61050;61045;47088;47086;47090;47089;40341;40339;47701	-	Uncharacterized protein OS=Echinococcus granulosus OX=6210 GN=EgrG_000663300 PE=4 SV=1	2.28249e+08	1.90208e+07
1591_1	tr|U6JBN4|U6JBN4_ECHGR	20.1119	NA	37563	GNPQLLSQFIQQLSVSYPDVVR;MSFNNPER;NLSSEEVYPILAQVPQFQQLR;VKVEQALR;VTDKNFVVVMAQIVKPLK	1;1;1;1;1	5	7	0.2265	66523;66522;15409;66185;12677;59061;59062	-	UV excision repair protein RAD23 OS=Echinococcus granulosus OX=6210 GN=EGR_02424 PE=3 SV=1	2.20973e+06	138108
1099_1	tr|A0A068WID0|A0A068WID0_ECHGR	2.1562	NA	13833.5	MSNKPQLTR	1	1	1	0.0682	20936	tr|W6UQR2|W6UQR2_ECHGR	Expressed conserved protein OS=Echinococcus granulosus OX=6210 GN=EgrG_000484100 PE=4 SV=1	193534	21503.8
530_1	tr|W6UJP6|W6UJP6_ECHGR	26.6449	NA	226598	AALELSQVR;LFTWLVAR;LQEAESDAESAK;LSQDITELQR;TALALIQR;VAFLLGVNAK;VGNEFVTK	1;1;1;1;1;1;1	7	7	0.0329	15021;15993;32687;28224;9460;17271;9864	tr|A0A068WWT7|A0A068WWT7_ECHGR	Paramyosin OS=Echinococcus granulosus OX=6210 GN=EGR_03301 PE=3 SV=1	2.18788e+06	16960.3
1598_1	tr|A0A068WQS9|A0A068WQS9_ECHGR	2.72906	NA	110774	GQVEDEVGEIR	1	1	1	0.0106	29841	tr|W6URC7|W6URC7_ECHGR	SH2 motif OS=Echinococcus granulosus OX=6210 GN=EgrG_000221000 PE=4 SV=1	0	0
1412_1	tr|W6U0K8|W6U0K8_ECHGR	2.70308	NA	109767	GCGGAPSPTSVR	1	1	1	0.0124	24472	tr|A0A068WK10|A0A068WK10_ECHGR	Cyclin_C domain-containing protein OS=Echinococcus granulosus OX=6210 GN=EGR_10576 PE=3 SV=1	0	0
310_1	tr|A0A068WLH8|A0A068WLH8_ECHGR	46.7588	NA	53025.9	DLYQNLTDYDIR;EPFFHGHDNYDQLVR;FNDILGR;FYMFELLR;IYADVNLNKPR;KEPFFHGHDNYDQLVR;LIDWGLAEFYHPGQEYNVR;TPALIFEYVDNK;TPALIFEYVDNKDFK;VLGTVELFDYIR	1;1;1;1;1;1;1;1;1;1	10	13	0.216	45726;55180;6760;6804;22736;34220;34213;58347;64161;64162;39974;53335;40754	tr|W6UG07|W6UG07_ECHGR	Casein kinase ii subunit alpha OS=Echinococcus granulosus OX=6210 GN=EgrG_000457900 PE=3 SV=1	2.42975e+06	93452
1091_1	tr|A0A068WFR5|A0A068WFR5_ECHGR	3.57287	NA	190007	WTYEDFLSR	1	1	1	0.0054	29042	-	Myosin va OS=Echinococcus granulosus OX=6210 GN=EgrG_000639400 PE=3 SV=1	0	0
53_1	tr|W6UGF0|W6UGF0_ECHGR	41.3974	NA	56221.6	AANQIMEVAER;ACGLDKPGIAGK;FALELAK;LLAELPFK;NIELDLGKPVK;NLNHVSFGR;TIIIQGFGNVGSYAFR;VIAEGANGPTTFYAHK;YNLGLDFR;YSLGELER	1;1;1;1;1;1;1;1;1;1	10	11	0.2087	29930;27214;27222;4536;12034;29594;17838;51838;50080;15580;13971	-	Glutamate dehydrogenase OS=Echinococcus granulosus OX=6210 GN=EGR_04594 PE=3 SV=1	2.54651e+07	748974
1559_1	tr|W6UTJ2|W6UTJ2_ECHGR	4.21845	NA	70423.3	SASLIGFLGK	1	1	1	0.016	15339	-	Ribosome biogenesis protein NSA2 homolog OS=Echinococcus granulosus OX=6210 GN=EGR_01094 PE=3 SV=1	0	0
1505_1	tr|A0A068WI99|A0A068WI99_ECHGR	21.7635	NA	16285.6	ASTSILR;DMDSVAYETAK;HLYLRPTGLTGLSK;LSTANEQAPHDPDWFYVR;VPDWVDVVK	1;1;1;1;1	5	5	0.4069	2383;29763;46856;61425;18625	tr|W6UQM4|W6UQM4_ECHGR	Ribosomal protein S19e OS=Echinococcus granulosus OX=6210 GN=EgrG_000480600 PE=3 SV=1	5.50535e+06	611705
368_1	tr|A0A068WCJ3|A0A068WCJ3_ECHGR	7.38389	NA	24792.1	IESGIGDSHLR;LGCVQAAGK	1;1	2	2	0.0877	27006;10399	-	Tetraspanin OS=Echinococcus granulosus OX=6210 GN=EgrG_001021500 PE=3 SV=1	8.31752e+06	831752
1093_1	tr|A0A068WQK5|A0A068WQK5_ECHGR	15.9623	NA	42890.6	EYLIEEVLFLR;FISLISDILLPK;ILQAEWVR;INFDYTK	1;1;1;1	4	4	0.1022	40693;37324;16384;10223	-	Ethanolamine kinase 2 OS=Echinococcus granulosus OX=6210 GN=EgrG_000360100 PE=4 SV=1	1.21715e+06	93627
312_1	tr|W6UTS9|W6UTS9_ECHGR	15.7795	NA	73050	STESQNQYEIGYR;VVEAPFNINMLTNVR;VYENLNIGEVLR	1;1;1	3	3	0.062	47419;51193;40389	tr|A0A068WPK3|A0A068WPK3_ECHGR	Transmembrane 9 superfamily member OS=Echinococcus granulosus OX=6210 GN=EGR_01189 PE=3 SV=1	225840	10265.5
945_1	tr|A0A068WLU3|A0A068WLU3_ECHGR	48.257	NA	53232.7	ALSTIDCLLAALR;DGNFLQEIR;DSWVPEMSLHDYHELENSIIEK;IAHIIETVDK;IAHIIETVDKSDDIK;IFYFNEIR;IPVYTEEVSK;LIEDAAVLR;QAEILR;RPSTAPQYSDEAPR;SYFNSDEAR	1;1;1;1;1;1;1;1;1;1;1	11	13	0.2484	40286;20935;68530;68529;24041;50639;21570;21641;25732;15693;1455;47426;20692	-	Zinc finger C2H2 type OS=Echinococcus granulosus OX=6210 GN=EgrG_000639300 PE=4 SV=1	7.66917e+06	247393
1152_1	tr|W6V1X1|W6V1X1_ECHGR	47.9698	NA	111251	ADLAELDQVSGAFNETIK;ATAVLFAK;DSVENFDPVAYER;LDILVNNAGFQLR;LGAGVSLVGR;QICQDASPNPEAYFHVVR;SALVTGASSGIGR;SVITLSHLAVPK;TAGFSDSEYASFLMR;VNCVAPGVVVTELHR	1;1;1;1;1;1;1;1;1;1	10	12	0.1343	56474;56473;6034;46265;43122;11909;61116;26471;32051;32050;50206;49399	tr|A0A068WAT3|A0A068WAT3_ECHGR	Protein transport protein Sec61 subunit alpha-like protein OS=Echinococcus granulosus OX=6210 GN=EGR_00201 PE=3 SV=1	9.9292e+06	220649
1414_1	tr|U6J428|U6J428_ECHGR	3.19749	NA	18320.3	LSFLIGR	1	1	1	0.0432	5243	-	THAP domain containing protein 4 OS=Echinococcus granulosus OX=6210 GN=EGR_00641 PE=4 SV=1	97851.1	9785.11
1518_1	tr|A0A068WYR8|A0A068WYR8_ECHGR	85.5023	NA	80598.9	AAEEVAGISR;ATQGANAAGETAEHPR;ELNVHSEILPLDSSLDDILEK;EPVIETLR;FSVSDVTVTYLR;GKDILSNFLFK;IAGFTPNFR;IIGDVFIR;ILCANEPFVER;INSAINSDEQR;LNAITAGGALAAQILPIR;NIPIGPLNLHVVNPEEK;RLNAITAGGALAAQILPIR;SLFFIAQIIPR;SYNYVCVVSSDKEPDWR;VAEETWQDMK;VIEPLADFHKDEVR;VIHGGVVPYHEIR;VVFAFGSQIK	1;1;1;1;1;1;1;1;1;1;1;1;1;1;1;1;1;1;1	19	21	0.3119	15829;47632;65157;13455;38803;32999;16792;12159;36701;30862;30954;52380;55413;56430;34358;60505;30247;49872;43260;43259;21213	tr|W6UEZ1|W6UEZ1_ECHGR	Glutamine amidotransferase OS=Echinococcus granulosus OX=6210 GN=EGR_08435 PE=4 SV=1	2.7194e+07	591174
947_1	tr|U6JE19|U6JE19_ECHGR	12.3922	NA	21638.2	FYTDLLK;IELGELTVHNVNQLK;YGVGSLLLR	1;1;1	3	3	0.1667	10168;50959;14550	-	N alpha acetyltransferase 50 NatE catalytic OS=Echinococcus granulosus OX=6210 GN=EGR_03101 PE=4 SV=1	1.47868e+06	105620
1183_1	tr|U6J7M1|U6J7M1_ECHGR	88.7614	NA	101158	DAATAPSLLISLINMMK;DTTPEVNAFQR;EMLDLESNLDKLENELR;EVNFSLEQMK;FYEGSGYLFEPFSFANIEK;GMELSNSSLQPILNR;KWFYK;LHTTEKPPTFHR;QAMLLDVTSR;QGHTTSATYSSHHVDFVAGVIIR;REDLQVVLNR;RGMELSNSSLQPILNR;SAGFGELGNTGNSVVGAGTSDYVPFR;SGYIEMVPQSDDFDVGFR;SVYHVLNLFNLDVTTK;VENICDGFHATLYACPDTQEK;VLETAAQSLRK;YIENELQK;YSDLESIEDPATGELLDK	1;1;1;1;1;1;1;1;1;1;1;1;1;1;1;1;1;1;1	19	31	0.3007	53028;32697;32749;59696;59697;29517;63045;49608;3456;42688;42687;22577;23705;66470;66290;66472;30591;30589;53734;67403;67383;67384;67405;59706;54960;54961;66317;66316;29030;17493;58160	-	V-type proton ATPase subunit a OS=Echinococcus granulosus OX=6210 GN=EGR_01798 PE=3 SV=1	4.52497e+07	1.16025e+06
1154_1	tr|A0A068WFG4|A0A068WFG4_ECHGR	18.3579	NA	183552	DVAEQGEELQR;LGELEANVK;LLSQLGDLMSAVNCGEGR;LSALVEK;NSWLVVMEHAESGVASLLR	1;1;1;1;1	5	5	0.0391	32471;14270;56454;2932;60420	-	Uncharacterized protein OS=Echinococcus granulosus OX=6210 GN=EgrG_000990300 PE=4 SV=1	2.04661e+07	200648
1156_1	tr|W6U7J0|W6U7J0_ECHGR	3.46004	NA	54648.5	QNSFIGWEGYR	1	1	1	0.0232	37179	tr|A0A068WXG1|A0A068WXG1_ECHGR	Uncharacterized protein OS=Echinococcus granulosus OX=6210 GN=EGR_07952 PE=4 SV=1	50213.7	1569.18
1416_1	tr|W6UEU0|W6UEU0_ECHGR	5.25985	NA	28482.6	AIVAFTDDNGNAR;CVETYHAYNLDEK;EAGSYMVGAYEK;EVTVLSQR;EYCIILNPVK;EYCIILNPVKR;FAQPPFPLYPGEQLQGEVTPLK;ILPPNEALLLR;IPGEQWLFEGPGVYKPR;KDHESIVQMPAK;KEVTVLSQR;LVTGPLTFIR;MVTVTAK;NTNITR;SAEMILPNSALLIEALMNFTDR;VITESGQVVLDYGEEEYR	1;0;0;0;0;0;0;0;0;0;0;0;0;0;0;0	1	7	0.7233	37682;37584;37680;37679;37629;37628;37681;49164;49163;49181;34300;34298;35250;12085;31061;39745;39744;66135;66134;66136;66142;66133;31079;31074;31073;31077;31075;31145;31080;31146;31144;31148;31147;31078;31143;57712;57707;57711;57710;57709;38585;38588;38586;39392;18868;18871;18867;18873;22624;22623;22626;2458;2460;978;66061;66062;66272;60185;60187;60184;60186;60183	-	Major vault protein OS=Echinococcus granulosus OX=6210 GN=EGR_08488 PE=4 SV=1	233983	14624
1638_1	tr|W6UGB4|W6UGB4_ECHGR	3.57287	NA	105938	VLKPWDLLSVLVQK	1	1	1	0.0146	49048	tr|A0A068WWL7|A0A068WWL7_ECHGR	Serine/threonine-protein kinase SRPK1 OS=Echinococcus granulosus OX=6210 GN=EGR_07936 PE=4 SV=1	0	0
1416_2	tr|A0A068WUZ9|A0A068WUZ9_ECHGR	225.349	NA	97000.1	AAGEEWMLVGPLEYVPPIEVEIVSTR;AIPLGDNEGIYVR;AIVAFTDDNGNER;ALETFMDGDK;ALETFMDGDKQR;ALKSHIDDFGR;CVETYHAYNLDEK;EAGSYMVGAYEK;ELELEFVQK;ELELEFVQKK;EVTVLSQR;EYCIILNPVK;EYCIILNPVKR;FAFGPELVMLDPDEEFTVLSLSGGKPK;FAQPPFPLYPGEQLQGEVTPLK;GLLELQVQLATLESTGQAK;GSVASVNFDVFHK;GVPSVGKK;HEAERLEQEAR;HGEEWLITYLDTESHIPSVNEEVVCVAEPIILTSQNYCVVCDPVDEK;HIACAGVER;IASQAEVEK;IEDEASAEEAR;IEDEASAEEARK;ILPPNEALLLR;IPGEQWLFEGPGVYKPR…	1;1;1;1;1;1;0;0;1;1;0;0;0;1;0;1;1;1;1;1;1;1;1;1;0;0;1;0;0;1;1;1;1;1;1;1;0;0;1;1;1;0;1;1;1;1;1;1;0;1;1;1;1;1;1;1;1;1;1;1;0;1;1;1;1	50	149	0.8239	70242;40278;40321;40277;40322;40279;40280;40660;40664;40616;40620;40551;40614;40615;23267;23266;23265;24262;40004;40005;31665;49164;49163;49181;34300;34298;35250;23779;23780;31939;12085;31061;39745;39744;70496;70497;70569;70498;66135;66134;66136;66142;66133;58286;39814;39859;39811;39813;39812;39856;39855;39860;3483;37792;75189;16269;16267;16270;14384;14387;14388;29235;29233;36695;36697;31079;3107…	-	Major vault protein OS=Echinococcus granulosus OX=6210 GN=EgrG_000142500 PE=4 SV=1	7.95719e+08	1.47355e+07
318_1	tr|A0A068WYS8|A0A068WYS8_ECHGR	10.5197	NA	83434.4	FAHIDGDHLTLLNVYHAFK;VESLLVTAISK	1;1	2	3	0.0411	62544;62545;25452	tr|W6U655|W6U655_ECHGR	RNA helicase OS=Echinococcus granulosus OX=6210 GN=EGR_08421 PE=3 SV=1	147653	3515.55
1673_1	tr|U6J0I8|U6J0I8_ECHGR	6.73262	NA	27821	QPVLMNAVQK;SSCNTAEFR	1;1	2	2	0.0766	22195;19566	-	Tetraspanin OS=Echinococcus granulosus OX=6210 GN=EGR_01389 PE=3 SV=1	150194	16688.2
1410_1	tr|W6UZZ2|W6UZZ2_ECHGR	3.03506	NA	26444.1	ALFYLDK	1	1	1	0.0306	8625	tr|A0A068WTS3|A0A068WTS3_ECHGR	Tetratricopeptide repeat protein 25 OS=Echinococcus granulosus OX=6210 GN=EGR_05860 PE=4 SV=1	1.74747e+06	102793
716_1	tr|U6FVP1|U6FVP1_ECHGR	7.44597	NA	28516.9	KLQVSPK;LPLYELYAAQSR	1;1	2	2	0.0717	4913;40691	-	Uncharacterized protein (Fragment) OS=Echinococcus granulosus OX=6210 GN=EgrG_002069800 PE=4 SV=1	237464	21587.7
1596_1	tr|W6UQY8|W6UQY8_ECHGR	12.6099	NA	117349	AEEILER;LCLNICVGESGDR;VLEQLTDQQPVFSK	1;1;1	3	4	0.0313	8119;44012;48874;48873	tr|A0A068WNM8|A0A068WNM8_ECHGR	60S ribosomal protein L11 OS=Echinococcus granulosus OX=6210 GN=EGR_09308 PE=3 SV=1	4.16194e+07	770729
245_1	tr|W6UCH9|W6UCH9_ECHGR	27.7324	NA	44480.3	ALGMNQTK;ETISLDELIETER;SILCIFFK;VTLQTFLAWK;YFLDAVEAGK;YGWFWNCPNGDGCHYR;YVQQVQK	1;1;1;1;1;1;1	7	7	0.1841	8295;46518;17023;28477;22298;60234;9817	tr|A0A068WGL9|A0A068WGL9_ECHGR	Zinc finger CCCH domain-containing protein OS=Echinococcus granulosus OX=6210 GN=EGR_09171 PE=3 SV=1	3.86562e+06	184077
1323_1	tr|A0A068WGE6|A0A068WGE6_ECHGR	31.5678	NA	21312.7	GGEELNFR;IINEFFK;ILDPEEVAEISAETGFSAK;KPNSSGVTEYNNR;QDFLLIPELAINPLGDR;RQDFLLIPELAINPLGDR;TMAEADVDGDGYITYDEFK	1;1;1;1;1;1;1	7	16	0.4492	11497;10869;10868;58457;58458;42820;42769;42818;42767;42822;42821;56548;56547;60078;60077;61279	-	Calcium binding protein p22 OS=Echinococcus granulosus OX=6210 GN=EgrG_000447500 PE=4 SV=1	1.61134e+07	1.34279e+06
1496_1	tr|U6JH31|U6JH31_ECHGR	32.7093	NA	28378.2	ALVEIAR;AVENSGTAVALK;GKDGVVFAVENIVLSK;LGDMNIQQLIK;TFSIDEHIGMVVAGLHSDTK;VFQIEYAYK;VIYTVHDEIKDK	1;1;1;1;1;1;1	7	8	0.3398	3488;25443;50045;32445;61647;61648;25490;42490	-	Proteasome subunit alpha type OS=Echinococcus granulosus OX=6210 GN=EGR_04209 PE=3 SV=1	8.76469e+06	515570
243_1	tr|A0A068WUI1|A0A068WUI1_ECHGR	4.98843	NA	16250.4	ACELIDESR;KASGADEYMIK	1;1	2	2	0.1429	20995;28838	tr|W6UGJ7|W6UGJ7_ECHGR	Tubulin-specific chaperone A OS=Echinococcus granulosus OX=6210 GN=EgrG_000718000 PE=3 SV=1	446195	34322.7
1189_1	tr|W6UQS6|W6UQS6_ECHGR	55.3033	NA	116465	AVYSFYNVSTETPWTVLMK;DDVVHAYVVER;EALIVAK;FGIGDGNLHYYLYNWR;KLVDVGFSHLTR;LHPVFSEEEFAHWFLPR;LPDTTSLPGFR;LVDVGFSHLTR;NLPGLSASK;QLLATYLESR;QLTNVMLTSPR;TNEAELLK;VLDIIIGK	1;1;1;1;1;1;1;1;1;1;1;1;1	13	15	0.1353	62903;34122;2160;57980;38036;38037;61303;61307;28283;30706;9504;27638;31725;11267;8686	-	Glycylpeptide N-tetradecanoyltransferase OS=Echinococcus granulosus OX=6210 GN=EGR_04495 PE=3 SV=1	1.95455e+07	305399
1444_1	tr|A0A068X2S4|A0A068X2S4_ECHGR	3.57287	NA	70508.4	SLDLSTAVIK	1	1	1	0.0159	18023	tr|W6U3V9|W6U3V9_ECHGR	TBC1 domain family 2 OS=Echinococcus granulosus OX=6210 GN=EgrG_000728200 PE=4 SV=1	322627	11522.4
321_1	tr|W6V1A3|W6V1A3_ECHGR	6.06948	NA	87017.3	ESLFSILK;SLPTVVTNSPSTGR	1;1	2	2	0.028	12351;40226	tr|A0A068WFJ2|A0A068WFJ2_ECHGR	TBC1 domain-containing protein OS=Echinococcus granulosus OX=6210 GN=EGR_00652 PE=4 SV=1	298673	7859.8
1520_1	tr|A0A068WGN7|A0A068WGN7_ECHGR	35.2538	NA	230475	AALIGNLK;EQSASLPSIDTLADLSFFR;GSLDFPVPVPR;HVATILDDSQQDFVLR;LFSQDDCASGFLHYR;SLLPTTQPLKPWIGLK;VLIDAGEDGSTVVK;YWIGLLR	1;1;1;1;1;1;1;1	8	8	0.0511	4917;60370;27021;54798;53742;53131;39640;11474	tr|W6V3T4|W6V3T4_ECHGR	Phospholipase A2 receptor 1 OS=Echinococcus granulosus OX=6210 GN=EgrG_000677600 PE=4 SV=1	430100	4480.2
1490_1	tr|A0A068WMV1|A0A068WMV1_ECHGR	5.25985	NA	12464.3	GIGGQITDEQLR	1	1	1	0.1101	33281	tr|W6V8N6|W6V8N6_ECHGR	Programmed cell death protein 5 OS=Echinococcus granulosus OX=6210 GN=EGR_02345 PE=3 SV=1	2.29155e+06	254617
1321_1	tr|W6VCB9|W6VCB9_ECHGR	15.7795	NA	110733	FSNQVLTTFLK;LVSPLSESQK;VAAATTIFSLIK	1;1;1	3	3	0.0338	33946;20659;30177	tr|A0A068WGB0|A0A068WGB0_ECHGR	Importin-7 OS=Echinococcus granulosus OX=6210 GN=EGR_00454 PE=4 SV=1	238694	5967.35
949_1	tr|W6UT44|W6UT44_ECHGR	9.4783	NA	134513	GIQAHGDSLK;GVGIALHSTSR;VPGTGEVISAADAFYR	1;1;0	2	2	0.0304	16924;21331;49457	tr|A0A068WT49|A0A068WT49_ECHGR	Uncharacterized protein OS=Echinococcus granulosus OX=6210 GN=EGR_03591 PE=4 SV=1	1.55984e+06	27854.3
949_2	tr|A0A068WZA6|A0A068WZA6_ECHGR	102.369	NA	341621	ALEQGIIDK;DLPNFNVR;EPDIVQIR;EQFDVSCDTK;EQLNIMQSLWQR;FCTEFGQHGDLEGDSR;FSTGVGIAFHHSPR;GEHLQLIDNR;GVAIGDPNNR;IAASQVPR;IQPDKIPK;IQSAGIPSAR;KGVIITK;KLQVSIVTSR;LQDHLVAAEQMQQEMK;LQSEVDTFR;LQSGDINLR;LQSGDINLREPDIVQIR;LQVSIVTSR;LTLVGAR;QLISTVGQDGR;QLVIAQK;SCWTYVDQLATLAQIHLK;SETIVPIR;TSAEYHQFYHEANEIEAK;VIYMDDER;VPGTGEVISAADAFYR;YPYYPVYEVK;YSGEIVGVR	1;1;1;1;1;1;1;1;1;1;1;1;1;1;1;1;1;1;1;1;1;1;1;1;1;1;0;1;1	28	30	0.0925	15013;14379;14115;29699;46454;54755;54754;44987;44986;27698;16272;7078;12491;15689;2889;23526;55839;21138;16430;57577;15853;1470;26313;4916;61467;11079;61809;17698;49457;35268;14642	-	Expressed conserved protein OS=Echinococcus granulosus OX=6210 GN=EgrG_000701500 PE=4 SV=1	1.90501e+07	119063
323_1	tr|W6V9H7|W6V9H7_ECHGR	22.2184	NA	10427.3	EWLQHTGSPK;IGFEVFGR;NTPSGTVEGEAEGSVSHINTFK;QNSIVGWVR;TIDNLTFDSFR	1;1;1;1;1	5	7	0.6383	26932;26933;11680;63303;18771;18835;35667	tr|A0A068WQW4|A0A068WQW4_ECHGR	Acylphosphatase-2 OS=Echinococcus granulosus OX=6210 GN=EGR_01770 PE=3 SV=1	1.1002e+07	1.37525e+06
325_1	tr|W6UPI5|W6UPI5_ECHGR	51.7045	NA	58040	AANVLVDQDGSVK;EGSYDGCWDR;EQPGQRPSFGELSHEIEEYIITK;FLGFCCDAPDGR;GMVYLEK;GNFGVVYR;IADFGLTR;IHDFNQK;SGYEPNSK;SLDELISHYYSCPVDGEVGLIEARPR;SLDLTNDAAFR;TSVQVQDFVLGGGR;VYYNESTGQFYISEATPFR	1;1;1;1;1;1;1;1;1;1;1;1;1	13	15	0.3249	34977;30719;68682;40165;6962;10862;9814;10274;9231;70779;29406;42618;63508;63531;63509	-	Tyrosine-protein kinase OS=Echinococcus granulosus OX=6210 GN=EGR_01972 PE=3 SV=1	1.93375e+07	805731
942_1	tr|A0A068WEL1|A0A068WEL1_ECHGR	26.0286	NA	17818.4	ECADMWPK;GSAITGPVAK;IASSAGSIH;ITLGLPTGAVMNCADNTGAK;LPSAATGDCVVCSVK;NLYVIAVFGVR	1;1;1;1;1;1	6	6	0.4424	17473;10246;7135;58413;47093;31214	tr|W6UN38|W6UN38_ECHGR	60S ribosomal protein L23 OS=Echinococcus granulosus OX=6210 GN=EGR_02069 PE=3 SV=1	7.23222e+06	516587
755_1	tr|U6JHZ1|U6JHZ1_ECHGR	28.3851	NA	17093.7	ADGTMIHFK;DTAEDDDDDVPELVGDFEEK;KLGINVIPSIEEVNMYR;KLQATLK;LGINVIPSIEEVNMYR;VQASPQANMFAVSGLAENK	1;1;1;1;1;1	6	13	0.4675	16635;63171;57738;57739;5016;54610;54611;54628;57492;57473;57493;57472;57494	-	Transcription factor BTF3 OS=Echinococcus granulosus OX=6210 GN=EGR_10149 PE=3 SV=1	1.64642e+07	1.82936e+06
1184_1	tr|A0A068WRY5|A0A068WRY5_ECHGR	2.03675	NA	44718.5	TSEFIK	1	1	1	0.0153	1218	tr|W6U6N2|W6U6N2_ECHGR	Arp2/3 complex 34 kDa subunit OS=Echinococcus granulosus OX=6210 GN=EgrG_000305600 PE=3 SV=1	3.48005e+06	151306
1019_1	tr|A0A068W7P7|A0A068W7P7_ECHGR	53.543	NA	113557	DLLMIVIR;DLQHPNEYIR;ELLDVQEAETK;ILQELVMDVVR;INILEYIQPSTCSDADFR;LLHLFWEVAPK;MWTCLVALADSR;NAFLMLLHVSQDTAVQYLSR;NAVLAIFTIYK;SADGAPVSGHVR;VTVSTQLTDLR	1;1;1;1;1;1;1;1;1;1;1	11	12	0.1318	14289;33151;32537;34940;61323;37022;40625;64160;31310;24952;24951;30034	tr|W6UWP0|W6UWP0_ECHGR	Coatomer subunit beta OS=Echinococcus granulosus OX=6210 GN=EgrG_000777200 PE=4 SV=1	4.87824e+06	81304
1105_1	tr|A0A068WA32|A0A068WA32_ECHGR	2.08718	NA	50248.5	FLLSSSTDQNVR	1	1	1	0.0276	37752	tr|W6V129|W6V129_ECHGR	WD repeats and SOF1 domain containing protein OS=Echinococcus granulosus OX=6210 GN=EgrG_000895100 PE=3 SV=1	31304.7	1159.43
1748_1	tr|W6VC58|W6VC58_ECHGR	2.22033	NA	21094	NENNLIR	1	1	1	0.0387	8820	-	Uncharacterized protein OS=Echinococcus granulosus OX=6210 GN=EGR_00978 PE=4 SV=1	1.64792e+06	126763
1096_1	tr|A0A068W910|A0A068W910_ECHGR	24.5783	NA	33095.5	HEEFVEGCK;KLELASTNIHR;LAPLQDK;NVLGMEVLR;QSSSHDPVR;VKHEGFLEVNDPAGYR	1;1;1;1;1;1	6	10	0.2075	23742;23743;33000;33001;4147;17201;15460;54141;54137;54140	-	Glyoxalase domain-containing protein 4 OS=Echinococcus granulosus OX=6210 GN=EGR_00569 PE=3 SV=1	4.24093e+06	212047
72_1	tr|Q869D6|Q869D6_ECHGR	8.77317	NA	65424.5	APIGGSAEQVEK;DPCTTNIGLQNVDVK;DTFNTVLFAVGR;FGEDNIEVFHSYFQPLEWTVPHRPDNTCYAK;FVRPCVPTSVR;HEDGTPFK;HEDGTPFKDTFNTVLFAVGR;INNAAVLVFAK;IPFGYLDLDLK;IPFGYLDLDLKK;LYTADDCR;MVEGIQDHIHALNFGYR;NITTNTIIVATGERPR;SFGWDVDKGPHDWVK;TIGIHPTCSETFTTLR;TTVPQVFFR;VVVDDEER;YLNALGEIVDPHTIK	1;0;0;1;0;0;0;0;0;0;0;0;0;0;0;0;0;0	2	2	0.3618	27153;50011;36269;73514;35104;11979;11980;63147;63146;25450;33695;40595;16305;58305;52156;52581;52583;54229;54227;21158;13634;50272;50273	-	Thioredoxin glutathione reductase OS=Echinococcus granulosus OX=6210 GN=TGR PE=2 SV=2	1.64583e+06	48406.7
757_1	tr|U6J026|U6J026_ECHGR	52.5376	NA	93336.6	APYLLK;AQIDCYDLSGR;DVAGKPIALFVTDLAR;FAWNEWNKPALILGR;IPLPDFK;KADEYICTR;LQAILDVR;NHLLHLDLR;SLSMEVHYSR;TEVPIHVFGIR;THILYAWAHNGAPLVLPER;THLFVLR;VPEPSAPSLPR	1;1;1;1;1;1;1;1;1;1;1;1;1	13	19	0.1653	324;33914;50346;50345;53735;53736;6507;25143;11853;23517;23518;28570;28568;32199;61693;61673;9450;24768;24765	-	Peptidyl glycine alpha amidating monooxygenase OS=Echinococcus granulosus OX=6210 GN=EGR_00446 PE=3 SV=1	1.53702e+07	404478
1459_1	tr|U6JME4|U6JME4_ECHGR	45.8124	NA	22872.4	IYAENAIR;KNEALNYMR;KPSLEDQLFDLK;KSIQAGNMDCSR;NEALNYMR;NVVNGMNAAMK;QLLGFSK;QTADEAGIELDLNLPSGITSTIGAPTTSVPAEEQELSDR;SIQAGNMDCSR;SMNLEK;VSNLMDQFEK	1;1;1;1;1;1;1;1;1;1;1	11	23	0.5534	13120;24016;41170;41169;41171;41168;37732;37733;16174;24791;24716;24718;24793;24717;25764;4586;73864;30435;30434;1071;28690;28746;28742	-	Charged multivesicular body protein OS=Echinococcus granulosus OX=6210 GN=EGR_07940 PE=3 SV=1	1.31896e+08	1.19906e+07
727_2	tr|I1WXU1|I1WXU1_ECHGR	77.2107	NA	54840	AGDTVLEGTR;CFHHDDENEAQICAGSSNK;ENIYDGWSR;GVCAGDTGGGLFCR;LETPVNIESDGAGVACVPK;LKSENIICGGTLITPR;NEQESDHVVDLVVIHPDWVAQR;RPQRPTSLNEIR;RPTFFNPFFWPFGR;RRPTFFNPFFWPFGR;SLFVYR;SNCIINSKPSEELTR;SWPWHVGIYK;TRNEQESDHVVDLVVIHPDWVAQR;VDSPFDVALLR;VSIDPPEK;WLYNSVGSVIQWINR;WSECSPHTCLEHR;WYVYGVMGSGPTQYCK;YIAEERPCEDK	1;1;0;1;1;1;1;1;1;1;0;0;1;1;1;1;1;0;1;0	15	36	0.5021	16576;62653;62651;62652;24069;40835;57332;57330;52573;52574;67630;67646;67641;67629;42889;42847;42888;42846;53760;53757;53758;57680;57679;4137;51933;32432;32433;32431;32436;69977;69980;69979;29960;9383;9384;54284;54285;54258;50694;55771;39959	-	Ag5 OS=Echinococcus granulosus OX=6210 GN=EGR_04862 PE=2 SV=1	6.97301e+07	2.40449e+06
727_1	tr|D6R8R1|D6R8R1_ECHGR	5.25985	NA	19344	ENIYDGWSR;LELTLDPDELVK;SLFVYR;SNCIINSKPSEELTR;WSECSPHTCLEHR;YIAEERPCEDK	0;1;0;0;0;0	1	1	0.4024	24069;38694;4137;51933;50694;39959	-	22 kDa antigen 5 (Fragment) OS=Echinococcus granulosus OX=6210 PE=2 SV=1	4.11661e+06	374237
247_1	tr|W6UTQ5|W6UTQ5_ECHGR	5.25985	NA	19192.7	NHEFVPLDLVHK;STLLLR	1;0	1	1	0.1078	41885;225	-	Serine/threonine-protein kinase RIO2 OS=Echinococcus granulosus OX=6210 GN=EGR_00618 PE=4 SV=1	218894	15635.3
1565_2	tr|A0A068WHV3|A0A068WHV3_ECHGR	17.8531	NA	98272.3	APSGFDLR;EYAHDIWGVEPR;IFNTGAYIDAVCGR;INHEFLQLVLAK;LVFLENYR;MVLANIAGAWK;NTAENISR;TVWDHLCSR	1;1;1;1;0;1;0;0	5	5	0.0962	8294;43042;46870;40763;18422;26332;10445;26287	-	Alpha-1,4 glucan phosphorylase OS=Echinococcus granulosus OX=6210 GN=EgrG_000501600 PE=2 SV=1	4.81905e+06	89241.7
247_2	tr|U6JH05|U6JH05_ECHGR	15.0747	NA	51439.1	EWVHICAGEK;GISDWIHENVK;LDQPVEFGDK;LLEVDLPLVSLQR;STLLLR	1;1;1;1;0	4	4	0.1094	29713;33931;24604;44136;225	-	Enteropeptidase OS=Echinococcus granulosus OX=6210 GN=EGR_06280 PE=4 SV=1	1.00242e+06	43583.5
1325_1	tr|U6J1F9|U6J1F9_ECHGR	8.12743	NA	10721.6	ELLPWLR;EQSADLPDSVK;VSFISTLHGG	1;1;1	3	3	0.2947	11795;27345;16528	-	Ubiquitin-related modifier 1 homolog OS=Echinococcus granulosus OX=6210 GN=EGR_02681 PE=3 SV=1	899516	224879
759_1	tr|W6UP25|W6UP25_ECHGR	26.1663	NA	137456	DISDKVETTESDHQDVLR;LEDDIPVER;LVYLVR;SVSSVPIEENR;VCEVDFYR;VGHYFEAPSEEVR;YLETLR	1;1;1;1;1;1;1	7	7	0.0568	60198;20467;3064;29056;20577;45323;4670	-	35 kDa nucleoporin OS=Echinococcus granulosus OX=6210 GN=EGR_05035 PE=3 SV=1	3.15761e+06	43855.6
1494_1	tr|W6UTL6|W6UTL6_ECHGR	2.54732	NA	56951.8	HLLTPR	1	1	1	0.0117	1809	tr|A0A068WPB6|A0A068WPB6_ECHGR	Protein-associating with the domain of ezrin OS=Echinococcus granulosus OX=6210 GN=EGR_01109 PE=4 SV=1	9.72854e+06	313824
1109_1	tr|A0A068WTP7|A0A068WTP7_ECHGR	66.4002	NA	38653	AAEACFLGAEDK;AALVQHLK;AGGLHCIAHAGENGPAASVTEAVHEMFAER;FQPYGVVAVDVAGDDKPCDGTNTDPR;GGANHDLQWR;GGHCYVEPR;GIHVPGSNAEEFTSR;GNPEWSDDVVAIAK;IGHGYHILDDPAVYK;KFQPYGVVAVDVAGDDKPCDGTNTDPR;KGIHVPGSNAEEFTSR;LSAEEVTK;LTGSVHGEWSSHPITR;TVLDALER;VNYSISTDDPTVTGQWMQAEK	1;1;1;1;1;1;1;1;1;1;1;1;1;1;1	15	24	0.5559	32968;9183;71251;71252;69685;25011;25012;19774;19773;48124;44406;50679;50678;70477;70476;51448;51447;51446;9013;52365;52362;52363;11206;65018	-	Adenosine deaminase OS=Echinococcus granulosus OX=6210 GN=EgrG_000536400 PE=3 SV=1	7.82489e+07	3.91244e+06
1297_1	tr|U6IXU7|U6IXU7_ECHGR	145.811	NA	50333.3	AAAPEPER;AEFYWLITNR;ALPFLGMK;DIPLDRLEEGR;ESAFLQVSR;EVHSFTVNQPFSVIIINR;FAEVEHGFTEGLDYGLFNSSR;FAIVFLLPLVPHK;FKHPDLFEVPILGPPGDGDAK;FLLTVLVGSK;FQSAIFVPMNDLTFK;GEWAQPLELYGSSK;GFHLVGIPFKDTR;GLFTHNFPK;GSFEVSPNTR;GTSADQITQALSPTNSR;HPDLFEVPILGPPGDGDAK;IDSGKESAFLQVSR;INLVDSALNEWALLSTAGLR;KGFHLVGIPFK;KSDCVLYQVR;MGVIWTETSR;NPFDSNQADFSGISDVENLR;QCSGSLVLATALQFK;SDCVLYQVR;VKVPEPPSNFK;VNPVDFLK;VPEPPSNFK;VQLCSMHV…	1;1;1;1;1;1;1;1;1;1;1;1;1;1;1;1;1;1;1;1;1;1;1;1;1;1;1;1;1;1;1	31	61	0.7627	7008;34804;34805;9031;34811;34813;17503;60454;60489;65082;65100;65081;44096;44097;63117;63120;63118;63119;19957;52211;47123;43768;18915;18912;18913;21127;21128;51910;51926;51929;51909;57722;57724;57723;46104;46103;61619;61620;30660;30659;32183;32182;26747;62742;62731;62730;62743;48255;48658;24078;30583;30587;30588;12088;16373;51506;51505;20932;48920;48919;48916	-	Estrogen regulated protein EP45 OS=Echinococcus granulosus OX=6210 GN=EGR_01303 PE=3 SV=1	1.3636e+08	4.39869e+06
1522_1	tr|A0A068WP17|A0A068WP17_ECHGR	2.48259	NA	22045	ANLYYVVK	1	1	1	0.0412	14116	-	Seven cysteines N terminal OS=Echinococcus granulosus OX=6210 GN=EgrG_000101700 PE=4 SV=1	0	0
381_1	tr|W6URH2|W6URH2_ECHGR	93.525	NA	61405.6	DIAFDIFGTDAQGDVSVAR;DSITPTYACAVLYISNDR;DVLQNHLIQVLALLAMEKPLSLSAEDIR;EMVQNLLILR;FANMIFSPLWNR;FDELDEAWR;FNSFWK;GGYFDDFGVIR;HPDVWTR;IFTPALQELEK;IKPIPYVHGSR;KLSSHLTGLFQEQQIFR;LCLYLIK;LIIEKPFGR;LPDAYER;LSSHLTGLFQEQQIFR;NGPPEADELMR;SDITVDTIR;SIKPLTLDNLVVGQYVGNPDAEDEEGKR;SSFHGDEVHSHVFVILGASGDLAR;TFFIGYAR;TIVSNYGQLVNR;VQPGEAVYLK;WHGVPFILR	1;1;1;1;1;1;1;1;1;1;1;1;1;1;1;1;1;1;1;1;1;1;1;1	24	31	0.5497	58222;59646;71429;29748;44166;26802;6419;30783;10822;33393;32145;59122;59123;59124;11609;19697;19702;8336;56049;29764;16647;71106;71105;67129;67127;67125;14381;37601;37602;21735;23172	tr|A0A068WPR2|A0A068WPR2_ECHGR	Glucose-6-phosphate 1-dehydrogenase OS=Echinococcus granulosus OX=6210 GN=EGR_04173 PE=3 SV=1	3.61978e+07	882872
1360_1	tr|W6U5Z0|W6U5Z0_ECHGR	3.04746	NA	116578	NTLLIEPLMDFFNKMLSHSSIQISYFAAGIVSHLACLPDDVWISALQYNK	1	1	1	0.0486	75417	tr|A0A068WPQ9|A0A068WPQ9_ECHGR	Exonuclease domain-containing protein OS=Echinococcus granulosus OX=6210 GN=EGR_08603 PE=4 SV=1	5.01467e+06	79598
387_1	tr|W6U8S3|W6U8S3_ECHGR	2.09283	NA	22697.7	VPLILR	1	1	1	0.03	558	-	DUF5726 domain-containing protein OS=Echinococcus granulosus OX=6210 GN=EGR_10222 PE=4 SV=1	43755.8	3365.83
751_1	tr|W6U1V0|W6U1V0_ECHGR	5.25985	NA	29139.8	TCIIFSSTFDNSTSSEQTHSLR	1	1	1	0.0856	66936	tr|A0A068WUN8|A0A068WUN8_ECHGR	Uncharacterized protein OS=Echinococcus granulosus OX=6210 GN=EGR_10119 PE=4 SV=1	1.93694e+06	161412
1186_1	tr|W6UP74|W6UP74_ECHGR	50.9115	NA	20195.2	ANSGMNATLYYEGK;CVLVGDGAVGK;EVCPTTPILLVGCQTDIR;KVTGNFPESYIPTVFDNYTVPIEIEGTK;SSFCNVTDK;SSFCNVTDKWVK;VTGNFPESYIPTVFDNYTVPIEIEGTK;YMECSAFTNDGVHDVFSNAILLGAGVK;YQLSLMDTAGQEGYENLR;YQLSLMDTAGQEGYENLRR	1;1;1;1;1;1;1;1;1;1	10	19	0.7049	45252;45317;19812;59920;59919;59918;71523;71525;18662;42996;42997;70993;70997;70433;70435;70459;70541;60212;63026	-	Cell division control protein OS=Echinococcus granulosus OX=6210 GN=EGR_01527 PE=4 SV=1	6.71083e+07	6.10076e+06
946_1	tr|A0A068WD12|A0A068WD12_ECHGR	8.33925	NA	24312.6	HDFVGLVEK;LQEELECCGGVGPTDWSKPYPASCCK	1;1	2	4	0.1549	17843;70984;70985;70983	-	Tetraspanin OS=Echinococcus granulosus OX=6210 GN=EgrG_001077400 PE=3 SV=1	3.86213e+06	386213
1499_1	tr|W6USL5|W6USL5_ECHGR	46.631	NA	28367.4	ATYVAIR;DSEWKPVTILGR;GQTATLGNFAK;HVFVEHEAYLR;IGKPHTVPCK;ISIIPVR;ITSLEEIYMYSLPIK;KLLSMAGIEDVYTSAR;KTYEYLTPDLWSVVPTQK;TYEYLTPDLWSVVPTQK	1;1;1;1;1;1;1;1;1;1	10	12	0.4068	4629;39544;39545;22020;39483;39482;23891;4817;53341;52119;61828;59267	-	40S ribosomal protein S2 OS=Echinococcus granulosus OX=6210 GN=EGR_08694 PE=3 SV=1	3.81307e+06	181575
753_1	tr|A0A068WHF9|A0A068WHF9_ECHGR	90.0676	NA	38471.6	ALYDFEAEQDDDLSLK;FCDSLTGHVR;FYAHLESK;GNAADNVPDTTLDTTLNGGTTYYDKPQSNFGYAAVVK;HLHSQVPLLK;ITFLQASAEAQLEYHK;KAIIEFK;KFYAHLESK;KGDIATILEK;LVIEAQNQLAAAER;NNKQENYNYEEK;QENYNYEEK;RGHFPVEFVQVLE;RITFLQASAEAQLEYHK;SFVGYLK;SVLNSGGAAGADDLSECK;TEVFSPIK;TEVFSPIKETTLK;VDDQWYFGEK;WATEAFTK	1;1;1;1;1;1;1;1;1;1;1;1;1;1;1;1;1;1;1;1	20	31	0.6243	55140;27492;27491;15426;73730;73723;26187;26189;26188;54642;54643;7542;23019;23018;20674;45629;45628;45693;47372;47373;29034;46893;46892;58443;5605;52053;11467;44041;44042;33253;13274	-	Endophilin A3 OS=Echinococcus granulosus OX=6210 GN=EGR_05034 PE=4 SV=1	5.95926e+07	2.59098e+06
248_1	tr|A0A068WKP1|A0A068WKP1_ECHGR	29.3343	NA	23737.9	DSPHIYEVTSNVR;GAIFSFDPVGSYER;ICLTGFHGDIITFIK;LLESHIK;LTDENMGLLFSR;RFFPFYVSAILAGIDEDGR	1;1;1;1;1;1	6	6	0.3721	45171;46423;51605;6978;39260;61947	-	Proteasome prosome macropain subunit beta OS=Echinococcus granulosus OX=6210 GN=EgrG_000252500 PE=4 SV=1	1.85998e+07	1.43075e+06
940_1	tr|U6JJ13|U6JJ13_ECHGR	95.9184	NA	82790	AWETRPIDIAR;EDQIETEIK;ELNNGTVNVR;FDLTYQTGDAPSVDGECSTILK;FMAILTENFAGK;FQQDDAHIFCR;HQCGTIQLDFQLPER;HYADNMFK;LFFFNELSPGSCFFLPAGAHIYNK;LPIEITLR;LVELMR;LWEISGHWK;MFDYNEFK;NEFSGALTGLTR;QFVASQPR;QLESSLNTSGVK;QVHPDEYPQLNK;QVLVVPVVSALDEYGHK;RFQQDDAHIFCR;SSSSYWEGR;VLGEHTVEHLIER;VYGISFPSQQAMK;WPFWLNPR	1;1;1;1;1;1;1;1;1;1;1;1;1;1;1;1;1;1;1;1;1;1;1	23	34	0.3583	35639;35640;21782;22576;65659;65660;36365;41308;41309;54440;16897;69527;13347;2975;25168;21063;32070;12142;31926;30796;42873;41998;42871;54736;54735;47909;47908;18728;45870;45872;45871;42254;22513;22512	-	Threonyl-tRNA synthetase OS=Echinococcus granulosus OX=6210 GN=EGR_06754 PE=3 SV=1	5.05687e+07	1.07593e+06
934_1	tr|W6USF9|W6USF9_ECHGR	35.4085	NA	21709.2	DGSLLYFFK;EGQFFSGELYLDEK;FGCAFCR;FGSCTVSNVVDK;FQSAFQAK;GDGWQTGGLVVVDK;LIGIGHDTEGVEEFR;NVVGNLK	1;1;1;1;1;1;1;1	8	9	0.4343	20801;49691;11234;34795;11777;41057;49950;49949;2141	-	Uncharacterized protein OS=Echinococcus granulosus OX=6210 GN=EGR_01663 PE=4 SV=1	1.49133e+07	932084
207_1	tr|W6U8I5|W6U8I5_ECHGR	5.25985	NA	53956.6	VFGSEHGLEDR	1	1	2	0.0224	30781;30782	tr|A0A068WME2|A0A068WME2_ECHGR	Inner membrane protein yhjX OS=Echinococcus granulosus OX=6210 GN=EGR_07569 PE=4 SV=1	184705	11544.1
560_1	tr|U6IX51|U6IX51_ECHGR	31.4026	NA	27640.7	AISLDGLTSVGIR;ALTLEEIDSR;FGYEMPCDVLLR;GEDCAVVACQCK;LFQVEYTFK;LFSLTPR;NDPIFR;TDPSGFVSGHR	1;1;1;1;1;1;1;1	8	8	0.3239	34153;24551;44361;39285;26388;6726;3000;25375	-	Proteasome subunit alpha type-6 OS=Echinococcus granulosus OX=6210 GN=EGR_06724 PE=3 SV=1	7.24169e+06	517264
179_1	tr|A0A068W9K1|A0A068W9K1_ECHGR	5.25394	NA	145188	ALELWPFDPLVTCPVLK;SSIIGLAR	1;1	2	2	0.0192	58278;5839	tr|W6U5C6|W6U5C6_ECHGR	Exportin 7 OS=Echinococcus granulosus OX=6210 GN=EgrG_000939900 PE=3 SV=1	83394.7	1303.04
815_1	tr|A0A068WP08|A0A068WP08_ECHGR	6.07921	NA	44867.7	EVSEAVPVDETVIER;HAYHAVPTAGFCR	1;1	2	2	0.0683	49955;43735	tr|W6URP2|W6URP2_ECHGR	Expressed conserved protein OS=Echinococcus granulosus OX=6210 GN=EGR_01041 PE=4 SV=1	839650	36506.5
566_1	tr|W6UYU5|W6UYU5_ECHGR	3.81102	NA	95098.8	FLVIDEADR	1	1	1	0.0106	19988	tr|A0A068WEF9|A0A068WEF9_ECHGR;tr|W6UYF4|W6UYF4_ECHGR;tr|A0A068WHZ8|A0A068WHZ8_ECHGR	ATP-dependent RNA helicase DDX51 OS=Echinococcus granulosus OX=6210 GN=EGR_01470 PE=3 SV=1	530670	9827.22
564_1	tr|W6UKW2|W6UKW2_ECHGR	3.17405	NA	33589.4	DTPGFIVNR	1	1	1	0.0293	16584	tr|A0A068WIW4|A0A068WIW4_ECHGR	Putative 3-hydroxyacyl-CoA dehydrogenase OS=Echinococcus granulosus OX=6210 GN=EGR_03347 PE=3 SV=1	590865	29543.2
240_1	tr|W6UCE4|W6UCE4_ECHGR	3.57287	NA	88418.2	VLPTLILIK	1	1	1	0.0115	16168	tr|A0A068WDR3|A0A068WDR3_ECHGR	RNA-binding protein 39 OS=Echinococcus granulosus OX=6210 GN=EGR_06246 PE=3 SV=1	0	0
205_1	tr|W6V110|W6V110_ECHGR	35.4034	NA	49638.8	DITVTYYPAGLTWGSR;EQCDLLIAAFK;ETVYIFK;FIDEMVESGK;KETVYIFK;KSVAPAIPTRPDQR;SVAPAIPTRPDQR;TNGCHVYLSEQAK;TTAPLAAK;WVVENQVGNR	1;1;1;1;1;1;1;1;1;1	10	11	0.1982	53331;34532;10169;25069;17028;46069;39884;39883;44733;3540;28084	tr|A0A068WFV3|A0A068WFV3_ECHGR	Adenylyl cyclase-associated protein OS=Echinococcus granulosus OX=6210 GN=EGR_00542 PE=3 SV=1	6.86588e+06	264072
1567_1	tr|A0A068WWI9|A0A068WWI9_ECHGR	3.57287	NA	81725.3	FIQNDLHLGR	1	1	1	0.0137	28853	tr|W6UA58|W6UA58_ECHGR	Pyridoxal dependent decarboxylase (Fragment) OS=Echinococcus granulosus OX=6210 GN=EgrG_000066700 PE=4 SV=1	0	0
1524_1	tr|A0A068WJP3|A0A068WJP3_ECHGR	5.24034	NA	8912.17	LQDQAIK;SGDAMLIQK	1;1	2	2	0.2025	5727;13761	-	Expressed protein OS=Echinococcus granulosus OX=6210 GN=EgrG_000647300 PE=4 SV=1	6.82235e+06	2.27412e+06
1419_1	tr|A0A5C1ZXC4|A0A5C1ZXC4_ECHGR	12.1438	NA	16615.3	IHKELSDLGR;IYHPNINSNGNICLDILR;VLLSICSLLTDPNPDDPLSPDIAR	1;1;1	3	3	0.3537	25929;61070;67974	tr|W6U4W7|W6U4W7_ECHGR	Ubiquitin-conjugating enzyme D2 OS=Echinococcus granulosus OX=6210 PE=2 SV=1	320323	64064.5
383_1	tr|A0A068WAX0|A0A068WAX0_ECHGR	3.34359	NA	13380.6	VINPAGQGVR	1	1	1	0.0758	16197	tr|W6VD71|W6VD71_ECHGR	Expressed protein OS=Echinococcus granulosus OX=6210 GN=EgrG_000796500 PE=4 SV=1	1.08436e+07	2.7109e+06
603_1	tr|W6UUB7|W6UUB7_ECHGR	2.33643	NA	28423.5	AGIGFIR	1	1	1	0.028	1673	-	Uncharacterized protein OS=Echinococcus granulosus OX=6210 GN=EGR_08206 PE=4 SV=1	1.00391e+06	77223.8
850_1	tr|A0A068W905|A0A068W905_ECHGR	6.24789	NA	31379.9	NFSEEVK;YMEVLDK	1;1	2	2	0.0498	7702;10035	-	Expressed protein OS=Echinococcus granulosus OX=6210 GN=EgrG_000852600 PE=4 SV=1	1.34914e+06	71007.2
539_1	tr|A0A068WH24|A0A068WH24_ECHGR	10.8663	NA	59447.7	IDAASTGDESDFQQK;LTLTDGK;LVGLLPSK	1;1;1	3	3	0.0554	48385;2379;6336	tr|W6UP72|W6UP72_ECHGR	Ubiquitin associated translation elongation factor EF1B OS=Echinococcus granulosus OX=6210 GN=EgrG_000961700 PE=4 SV=1	702600	22664.5
99_1	tr|A0A068WEH5|A0A068WEH5_ECHGR	7.3003	NA	16454.4	ELVATEDDIQTLK;HLVEIK	1;1	2	2	0.1301	43193;1901	tr|A0A068WAV4|A0A068WAV4_ECHGR;tr|A0A068WAV1|A0A068WAV1_ECHGR;tr|W6U4D3|W6U4D3_ECHGR	Tumor protein d52 OS=Echinococcus granulosus OX=6210 GN=EgrG_000949820.1 PE=3 SV=1	524632	47693.8
813_1	tr|U6JGB1|U6JGB1_ECHGR	33.2856	NA	22198.4	FTTYDLGGHEQAR;IDVPSAVSEAVLR;ILNYLGLYQK;LVFLGLDNAGK;SHLGLDGQVTGK;TTLLHR;YGTHNPTLHATCEELTIAGMK	1;1;1;1;1;1;1	7	11	0.4322	44115;44113;37161;29547;24629;24581;28774;28771;1995;64681;64680	-	GTP-binding protein SAR1b OS=Echinococcus granulosus OX=6210 GN=EGR_08144 PE=3 SV=1	2.35844e+07	1.81419e+06
388_1	tr|A0A068WCQ3|A0A068WCQ3_ECHGR	5.57904	NA	108826	IDEIFK;ITDFGLSK	1;1	2	2	0.0142	3173;9211	tr|W6UWJ4|W6UWJ4_ECHGR	Serine:threonine protein kinase tousled OS=Echinococcus granulosus OX=6210 GN=EgrG_000784600 PE=4 SV=1	4.57781e+06	108995
203_1	tr|W6V1A4|W6V1A4_ECHGR	30.644	NA	56439.3	DSYELAAEGK;EKESELPLDAAADAVLSELFQTR;ESELPLDAAADAVLSELFQTR;ISHILSLEASHDR;KDSYELAAEGK;TQALLWIK;VNTLDVLEEEDSK	1;1;1;1;1;1;1	7	8	0.132	20298;67068;63564;43355;28698;28695;14288;43937	tr|A0A068WA71|A0A068WA71_ECHGR	Solute carrier family 43 member 3 OS=Echinococcus granulosus OX=6210 GN=EGR_05528 PE=4 SV=1	7.15671e+06	477114
1565_1	tr|A0A068WMG7|A0A068WMG7_ECHGR	8.32501	NA	97633.9	INQEFLDLMLTK;LVFLENYR;NTAENISR;TVWDHLCSR;VLYPNDNFFEGK	1;0;0;0;1	2	2	0.0578	42743;18422;10445;26287;41638	-	Alpha-1,4 glucan phosphorylase OS=Echinococcus granulosus OX=6210 GN=EgrG_000501500 PE=2 SV=1	922855	16779.2
811_1	tr|A0A068WRM7|A0A068WRM7_ECHGR	22.6234	NA	34032.6	AWFDNK;EGLVLHIGLSNFNESQVQR;EIGTLGIYQR;GILSTGFAPLGSPYR;HIDCAHLYQNEEAIGNALK;LIDFASSR	1;1;1;1;1;1	6	6	0.2558	3935;61288;24771;46061;62271;10748	tr|W6V2I6|W6V2I6_ECHGR	Aldo keto reductase family 1 member B4 OS=Echinococcus granulosus OX=6210 GN=EgrG_001163200 PE=4 SV=1	2.50426e+06	119250
601_1	tr|U6JIW0|U6JIW0_ECHGR	36.8189	NA	13352.7	CGDNELSATGNDYAVDVR;LLATAGNAMAEHLSHSGY;SWNEIVESILK;TMVIITGNSKPK;VASGTEAESFTVNGK;VASGTEAESFTVNGKK;YNGASCACLAGIDGNIWASSPDFKPTQAEILK	1;1;1;1;1;1;1	7	24	0.8492	57321;57350;57322;54461;54460;54489;54834;54491;54487;35103;33456;33396;33455;33395;44256;44254;44203;44253;48714;48715;72698;72697;72705;72704	-	Profilin OS=Echinococcus granulosus OX=6210 GN=EGR_04103 PE=3 SV=1	1.33974e+07	2.2329e+06
817_1	tr|W6U1J1|W6U1J1_ECHGR	8.34046	NA	28856.6	RVEVDPHGVPR;SELYDGER;YTICEGR	1;1;1	3	3	0.097	31775;14045;10084	tr|A0A068X3P7|A0A068X3P7_ECHGR	Uncharacterized protein OS=Echinococcus granulosus OX=6210 GN=EGR_10205 PE=4 SV=1	3.69437e+06	284183
201_1	tr|A0A068WEG7|A0A068WEG7_ECHGR	2.65929	NA	50274.9	IADFGLAR	1	1	1	0.0184	8305	tr|W6UGA4|W6UGA4_ECHGR;tr|W6UMI0|W6UMI0_ECHGR;tr|A0A068WLB0|A0A068WLB0_ECHGR;tr|A0A068WTI1|A0A068WTI1_ECHGR;tr|A0A068WKS1|A0A068WKS1_ECHGR;tr|W6US71|W6US71_ECHGR;tr|W6UZ63|W6UZ63_ECHGR	Cyclin dependent kinase 9 OS=Echinococcus granulosus OX=6210 GN=EgrG_000627050 PE=3 SV=1	0	0
1200_1	tr|U6J8S4|U6J8S4_ECHGR	10.5197	NA	28364.7	IVNGQVVNTTTVR;LVSEAYEVLSDPQKR	1;1	2	2	0.1089	39589;51575	-	DnaJ subfamily B OS=Echinococcus granulosus OX=6210 GN=EGR_07837 PE=4 SV=1	849650	65357.7
856_1	tr|A0A068WEH7|A0A068WEH7_ECHGR	26.557	NA	101898	AIFNPHIEVRPK;DIFNAIEYATNESCPNR;IFESMEQSITCCIK;LTFSNLDK;SGVVTNVDGLHNLHWLPDR;SVALGGAAAAHSTAR	1;1;1;1;1;1	6	7	0.0928	40539;58656;58655;51884;12383;61086;36270	-	Zinc finger C2H2 type OS=Echinococcus granulosus OX=6210 GN=EgrG_000628000 PE=4 SV=1	1.3179e+06	28650.1
1029_1	tr|W6UTE5|W6UTE5_ECHGR	69.5146	NA	87711	ATNLSTVLQEELTLAADR;CDLDVYSR;ECFATTLANMLR;FDCVELR;GGLAAFTTQTTR;INCADHLAVTAVIK;LCSALAEK;LHLIGAAVDEADSGTQGEVK;LSFVFHR;MKDEASTQMK;QEGNQLVYLNR;QLLFDTDAIEINPTTYVK;SGVIGSSLVHGVR;SLSQFAHACAR;TLTEAGFPEAK;VILIDSR	1;1;1;1;1;1;1;1;1;1;1;1;1;1;1;1	16	21	0.2346	57054;16993;40842;12415;29481;45588;45589;9761;9758;58564;10606;25958;35964;60098;32197;32200;30952;30956;25655;25656;5746	-	Exocyst complex component OS=Echinococcus granulosus OX=6210 GN=EGR_00498 PE=3 SV=1	3.12158e+07	624317
176_1	tr|A0A068WF73|A0A068WF73_ECHGR	132.692	NA	93969.9	AFPQCQFDHWQLYPGNPLDPNSKPGALVAGIR;AFVHFILDPITK;AGIIAESR;ALSTMGQDPESLYQHLSR;AVQDEDKPMIQK;AYLPVNESFGFTAELR;DLEEDHACIPIK;EIDDNVVTAK;ETVTEVSSVQALSK;FSVSPVVR;FYALGR;GGGQIIPTAR;GIIFSEENTPGTPIYIVK;GKPEAIPSLDNFIDKL;GVQYLNDIK;IKPILFMNK;ILTENYGWDATDAR;KIWCFGPDR;KSEPVVSYR;KVQPVDSDVSGK;LWGDNFFNAAEK;MEMLYEGPK;MLTAIDVK;NMSVIAHVDHGK;STAISLYNELNADQLDYVR;TGTITTFSGAHNMR;VFSGTIATGQK;VNFTVAEIR;VQPVDSDVSGK;VTDGALVVVDA…	1;1;1;1;1;1;1;1;1;1;1;1;1;1;1;1;1;1;1;1;1;1;1;1;1;1;1;1;1;1	30	42	0.4376	73077;39550;39552;5827;59135;59134;39579;39580;53700;41446;21704;43356;9730;1288;14118;57806;57826;52178;18253;21749;48685;26685;19160;19153;31669;31672;40047;40084;40082;21304;9724;34526;34523;62080;62079;44062;44121;22070;18115;18180;23486;66510	-	Elongation factor 2 OS=Echinococcus granulosus OX=6210 GN=EgrG_000865300 PE=3 SV=1	8.4241e+07	1.7192e+06
1063_1	tr|W6UI42|W6UI42_ECHGR	54.7412	NA	67463.6	DNELWTPLHAAATCGNK;FGANIMFLEAASR;GDIEEVK;GDIEEVKK;GSPSGSLLR;HIPAIAIDHR;HYAAGDDLQDLDSQGAAPIHIAAACGFAEVAR;LVSEAEK;QNNTVPNLIR;SGQTVDTICDSR;SSPEINGVDSLTAR;STDTLNSNYSGR;TKGSPSGSLLR;WEEYDLSYPNEPR	1;1;1;1;1;1;1;1;1;1;1;1;1;1	14	17	0.2598	55838;40849;4406;11266;8841;24304;72120;72121;3708;26008;26061;36178;41818;34880;34956;21674;50656	-	Protein phosphatase 1 regulatory inhibitor subunit OS=Echinococcus granulosus OX=6210 GN=EGR_04349 PE=4 SV=1	1.09052e+07	419429
935_1	tr|U6IVS5|U6IVS5_ECHGR	2.18613	NA	53347.4	DQILNR	1	1	1	0.0124	2902	-	GLE1 RNA export mediator OS=Echinococcus granulosus OX=6210 GN=EGR_05979 PE=3 SV=1	1.44322e+06	72160.9
132_1	tr|W6VBK1|W6VBK1_ECHGR	2.73604	NA	12559.9	APVPLVSK	1	1	1	0.0741	5481	tr|A0A068WCF5|A0A068WCF5_ECHGR	RING-box protein OS=Echinococcus granulosus OX=6210 GN=EGR_00753 PE=4 SV=1	2.43196e+06	486392
937_1	tr|A0A068X107|A0A068X107_ECHGR	12.8452	NA	43738.2	HCCGSVGAADWLR;LSEVAGPALLTLSTR;SALIYSR	1;1;1	3	4	0.0875	43824;43825;45700;5431	-	Expressed conserved protein OS=Echinococcus granulosus OX=6210 GN=EgrG_000372900 PE=4 SV=1	4.78324e+06	434840
170_1	tr|A0A068W6U4|A0A068W6U4_ECHGR	43.1342	NA	29005.4	APSELSSYQEK;GCLPAETELNGK;HLDKFPDSTLEELIVHGLK;IHQIEYAMEAVK;MQVPTQQYGR;NCALAVVGK;QGSAAVALK;RPFGVGMLITGFDEK;WAYNEPLPVSR	1;1;1;1;1;1;1;1;1	9	10	0.4138	30383;33421;62190;41105;41104;28513;12070;7297;49852;35846	-	Proteasome subunit alpha type OS=Echinococcus granulosus OX=6210 GN=EgrG_000750500 PE=3 SV=1	6.43163e+06	378331
854_1	tr|U6JHT7|U6JHT7_ECHGR	25.7249	NA	126666	DFFIPAFAR;FFHEHFEKDEER;IADVAAELVR;LGVGYLNYER;LMEAISTEPER;NYHSAIIPAILHVLDDEVPR	1;1;1;1;1;1	6	6	0.0633	20358;49383;18634;27007;32593;63524	-	Importin-5 OS=Echinococcus granulosus OX=6210 GN=EGR_05797 PE=4 SV=1	4.53343e+06	78162.5
533_2	tr|W6U8T0|W6U8T0_ECHGR	5.25985	NA	71906.1	ATGVLTNTR;DCQVFPTMK;DMESDANLK;FALGAYPFDQK;FCPNEYK;HPFEEWPYNTMAR;ITHASPSGCYGHVSYR;KFCPNEYK;KHPFEEWPYNTMAR;NFYPQNVALPADLSVK;NVILLLGDGMGLPTISAGR;QANGYFLFIESGR;QQTLVPLPYSSHGGDDVGVYATGPMSPIFHVTVDNTMIAQAMK;RNPGILDIFSWTYR;SLDEMK;SLVDEWVNYHK;SPTYWYNLAK;TGMIGLTGDIGVK;TYDLETSVTDSASSATAYLTGTK	0;0;0;0;0;0;0;0;0;0;0;1;0;0;0;0;0;0;0	1	4	0.3754	12146;23199;16769;31544;13473;50106;53106;53108;53107;20459;20458;53475;53473;53505;52699;52680;52681;52697;52698;55806;55805;44480;44482;43687;44544;74208;51681;51682;1114;38991;38995;38944;38994;38945;38939;30624;30682;31833;65192;65191	-	Alkaline phosphatase OS=Echinococcus granulosus OX=6210 GN=EGR_08267 PE=3 SV=1	4.58235e+06	183294
533_1	tr|A0A068X1B4|A0A068X1B4_ECHGR	5.25985	NA	60820	ATGVLTNTR;DCQVFPTMK;DMESDANLK;FALGAYPFDQK;FCPNEYK;HPFEEWPYNTMAR;ITHASPSGCYGHVSYR;KFCPNEYK;KHPFEEWPYNTMAR;NFYPQNVALPADLSVK;NVILLLGDGMGLPTISAGR;QQTLVPLPYSSHGGDDVGVYATGPMSPIFHVTVDNTMIAQAMK;RNPGILDIFSWTYR;SLDEMK;SLVDEWVNYHK;SPTYWYNLAK;TGMIGLTGDIGVK;TYDLETSVTDSASSATAYLTGTK;VYFAESVLEAAYK	0;0;0;0;0;0;0;0;0;0;0;0;0;0;0;0;0;0;1	1	2	0.4485	12146;23199;16769;31544;13473;50106;53106;53108;53107;20459;20458;53475;53473;53505;52699;52680;52681;52697;52698;55806;55805;74208;51681;51682;1114;38991;38995;38944;38994;38945;38939;30624;30682;31833;65192;65191;43897;43898	-	Alkaline phosphatase OS=Echinococcus granulosus OX=6210 GN=EgrG_000393400 PE=3 SV=1	6.48768e+06	308937
363_1	tr|A0A068WBF3|A0A068WBF3_ECHGR	12.9736	NA	115009	HLDQVAALIR;LDVVNLFGACSK;LSFIGTLLK;VLLSLIDR	1;1;1;1	4	4	0.0382	23845;35365;15284;11911	-	Peptide alpha N acetyltransferase OS=Echinococcus granulosus OX=6210 GN=EgrG_001014800 PE=3 SV=1	658435	10794
134_1	tr|A0A068WQL9|A0A068WQL9_ECHGR	58.1477	NA	54517.9	AESLEFFIDK;AHELEYGK;EAAHLLNEALVIR;FANEMAK;FDAAEVIEECAGRPGK;HLGPDHPAVAATLNNLAVLYGK;TALMENPTVATTLR;TLHNLVIQYASEGR;VLGSDHPDVAK;VVALEEEINNLK;YDAPDQSGLPGGDAGGK;YDAPDQSGLPGGDAGGKDIK;YEVAVPLCK;YKEAAHLLNEALVIR	1;1;1;1;1;1;1;1;1;1;1;1;1;1	14	19	0.3258	27926;12912;41943;41944;5461;51951;63503;63502;45224;48132;48131;23939;23941;37984;48218;57449;20064;51739;51738	tr|W6ULX7|W6ULX7_ECHGR	Kinesin light chain OS=Echinococcus granulosus OX=6210 GN=EgrG_000211900 PE=3 SV=1	1.11745e+07	338622
607_1	tr|A0A068WD70|A0A068WD70_ECHGR	17.1106	NA	16803.1	KNCPIGEKPAVVK;NCPIGEKPAVVK;NMIIFPEMVGSVVGIYNGK;TFNQVEIRPEMIGHYLGEFSITYKPVK	1;1;1;1	4	8	0.4069	41487;41479;34771;34770;59863;71698;71697;71699	tr|W6UXX6|W6UXX6_ECHGR	40S ribosomal protein S15 OS=Echinococcus granulosus OX=6210 GN=EgrG_000876600 PE=3 SV=1	5.31935e+06	886558
1208_1	tr|U6JBE6|U6JBE6_ECHGR	3.69757	NA	53841.2	EAYDYLDTLLTR	1	1	1	0.0256	43100	-	Serine/threonine-protein kinase RIO1 OS=Echinococcus granulosus OX=6210 GN=EGR_02261 PE=3 SV=1	148318	5114.41
852_1	tr|W6UKN1|W6UKN1_ECHGR	8.67889	NA	37380.4	SAISLTQHSCTTNANSCR;YTVYATPTK	1;1	2	2	0.0785	58492;17840	-	Tyrosine-protein phosphatase Lar OS=Echinococcus granulosus OX=6210 GN=EGR_03535 PE=4 SV=1	1.2396e+06	56345.5
1669_1	tr|U6J322|U6J322_ECHGR	15.7795	NA	15676.7	FITQINMDGVGGGGQIDNSK;IFYLMDELEAGQK;IYNLQIVCGNDYPDKPPEVR	1;1;1	3	7	0.3786	59502;59515;59503;46877;65291;65287;65303	-	Ubiquitin conjugating enzyme OS=Echinococcus granulosus OX=6210 GN=EGR_03334 PE=4 SV=1	5.5061e+06	688263
605_1	tr|W6UJ00|W6UJ00_ECHGR	2.14936	NA	16637.3	IYTVMNQAAK	1	1	1	0.0714	24036	tr|A0A068WPE8|A0A068WPE8_ECHGR	60S ribosomal protein L35 OS=Echinococcus granulosus OX=6210 GN=EGR_04041 PE=3 SV=1	1.80192e+06	225240
384_1	tr|W6U881|W6U881_ECHGR	4.87485	NA	44356.5	MFEYLK;YGLDFR	1;1	2	2	0.0305	6535;3401	tr|A0A068WQ81|A0A068WQ81_ECHGR	L-threonine 3-dehydrogenase OS=Echinococcus granulosus OX=6210 GN=EGR_07758 PE=4 SV=1	100373	3717.52
172_1	tr|W6UHX5|W6UHX5_ECHGR	10.5197	NA	29722.6	FAHYTGTTSVPGR;FTPGAFTNQIQSGFK	1;1	2	2	0.1026	39156;49191	tr|A0A068X0R0|A0A068X0R0_ECHGR	40S ribosomal protein SA OS=Echinococcus granulosus OX=6210 GN=EGR_04491 PE=3 SV=1	243806	18754.3
92_1	tr|A0A068WRQ8|A0A068WRQ8_ECHGR	2.52259	NA	423667	LNIELNGLCKNLADR	1	1	1	0.004	51881	tr|W6UNI8|W6UNI8_ECHGR	Dynein heavy chain OS=Echinococcus granulosus OX=6210 GN=EgrG_000255900 PE=3 SV=1	0	0
1021_1	tr|W6UN64|W6UN64_ECHGR	19.152	NA	19256.7	AFFFVR;ETISAAYK;FGLITWIGNDCKPIR;GTSFGEIHTFLDPSTR;IKECIQSFAVDLTYSEVSECR;QEAVEEAMR	1;1;1;1;1;1	6	7	0.4335	4248;9289;53062;53061;52392;67085;19007	-	Coactosin-like protein OS=Echinococcus granulosus OX=6210 GN=EGR_02690 PE=4 SV=1	4.7413e+06	364715
859_1	tr|W6USF5|W6USF5_ECHGR	3.69757	NA	87033.1	ELAQQVIQVAEQFCSAAR	1	1	1	0.0229	59454	tr|A0A068WFZ1|A0A068WFZ1_ECHGR	RNA helicase OS=Echinococcus granulosus OX=6210 GN=EGR_00515 PE=3 SV=1	331859	8094.12
365_1	tr|W6USC3|W6USC3_ECHGR	24.0522	NA	23508.1	APNRFCCEDGR;FCCEDGR;FRPYIGK;QLCFTYPLVGCVDEIYR;TILYLQDEMDCCGANGPADWK;YFLSAIQEIESNNNTELLR	1;1;1;1;1;1	6	15	0.3472	38496;12688;12687;9217;60817;61165;61163;61164;66149;66147;66148;66146;63197;63186;63196	tr|A0A068WG91|A0A068WG91_ECHGR	Tetraspanin OS=Echinococcus granulosus OX=6210 GN=EGR_00712 PE=3 SV=1	1.72272e+07	1.91413e+06
1253_1	tr|W6U981|W6U981_ECHGR	5.49887	NA	57265.8	EGTHLAYGNSDGILSILELGQSR;VAEVPLR	1;1	2	2	0.0577	65816;4099	-	Protein phosphatase PP2A regulatory subunit OS=Echinococcus granulosus OX=6210 GN=EGR_08075 PE=4 SV=1	1.40475e+06	61076.2
1023_1	tr|U6IXT6|U6IXT6_ECHGR	43.5913	NA	112202	AHTQAPLAAR;ELLAYAAENWR;ETGLLNDDNIGYR;FILMAWR;GHYIGLYPR;LGAINSVFSSAK;SAYHDQLWGGEFYR;SSIPHGLLSWEWGFPADR;SSLRPGIYNHK;VLSPHTSR;VNVADQFIVSVFR;YDSTTPSDAR	1;1;1;1;1;1;1;1;1;1;1;1	12	14	0.1364	17457;36046;43458;12342;19882;19883;27639;27702;51438;59567;32379;10004;44081;22273	-	Bile acid beta glucosidase OS=Echinococcus granulosus OX=6210 GN=EGR_01291 PE=4 SV=1	6.67883e+06	128439
90_1	tr|A0A068WKB6|A0A068WKB6_ECHGR	16.0814	NA	55086.4	AANILVDADNSVK;LGSLDELIK;LGYSAQK;TNSDEISFR	1;1;1;1	4	4	0.0772	35761;15086;3273;19375	-	Tyrosine-protein kinase OS=Echinococcus granulosus OX=6210 GN=EgrG_000579850 PE=3 SV=1	195776	6991.99
1061_2	tr|A0A068WHG5|A0A068WHG5_ECHGR	5.25985	NA	40427.5	ATTEAELR;FGVQDPSFIK;HVVVIGDGAGANIVAR	0;1;0	1	1	0.0932	9704;23948;46540;46539	-	Ndr OS=Echinococcus granulosus OX=6210 GN=EGR_05043 PE=3 SV=1	852822	38764.6
1061_1	tr|W6UF53|W6UF53_ECHGR	4.21845	NA	39655.2	ATTEAELR;HVVVIGDGAGANIVAR;SCGPLTAYLHGGR	0;0;1	1	1	0.1034	9704;46540;46539;38892	-	Uncharacterized protein OS=Echinococcus granulosus OX=6210 GN=EGR_05043 PE=3 SV=1	0	0
367_1	tr|W6UHA5|W6UHA5_ECHGR	18.1417	NA	26811.2	ALENLAVDWVAR;ELLDFHNIK;GSVKPSAANMLEMVYSK;YSGTGQNLALSGGSR	1;1;1;1	4	6	0.2163	37195;37197;23403;23406;53658;42870	-	Peptidase inhibitor OS=Echinococcus granulosus OX=6210 GN=EGR_04630 PE=4 SV=1	3.12282e+06	312282
931_1	tr|A0A068WWV9|A0A068WWV9_ECHGR	2.12783	NA	58538.1	AFDEIR	1	1	1	0.0112	2496	tr|W6UUR5|W6UUR5_ECHGR	Glycogen synthase kinase 3 OS=Echinococcus granulosus OX=6210 GN=EGR_08023 PE=3 SV=1	2.25236e+06	80441.5
96_1	tr|W6UIT3|W6UIT3_ECHGR	236.679	NA	189998	AASAANNYEDLVR;AFMAADMPNELIELLEK;AGDPTNYDEVIR;ALEHYTDLYDIK;AMLQANIR;AQLNEGVIK;AVNEALNNLLIEEEDYQALR;AYEYAER;CGLPGAEDLFIK;EAIDSYIK;EDKLECSEELGDLVK;EHLELFWSR;ELVAVCNENSLFK;ENQYYDSYVVGK;ESNCYDPER;EVCFACVDHNEFR;FDFVHDLVLYLYR;GQFSTDELVAEVEKR;HSIEAHSNFDNIALAQALEK;HSSLANAQIINYR;IHEGSVEPATHNALAK;IVLDNSVFSDHR;IYIDANNSPER;KFESLFQAGQYSEAAK;KFEVNNLAMQVLIDNIQNLDR;KGQVLSVSIDEENVVNYIK;KVNYSPEYISLLR;LAITLVHLGEYQGA…	1;1;1;1;1;1;1;1;1;1;1;1;1;1;1;1;1;1;1;1;1;1;1;1;1;1;1;1;1;1;1;1;1;1;1;1;1;1;1;1;1;1;1;1;1;1;1;1;1;1;1;1;1;1	54	66	0.4071	39151;56820;36789;43467;43464;11196;14223;64328;64327;10265;35213;12469;52348;29055;29052;45459;42715;26029;50244;50741;50970;50971;62482;62483;43764;43763;50015;39581;39628;33568;53434;66521;61181;47651;58592;39056;23301;36416;36468;58241;5349;64894;46854;24552;37067;4871;41328;41329;43197;5731;5606;19461;19460;22307;37054;37053;46318;71410;25597;18437;54920;54927;51542;61262;18563;7759	tr|A0A068WVJ6|A0A068WVJ6_ECHGR	Clathrin heavy chain OS=Echinococcus granulosus OX=6210 GN=EGR_04104 PE=3 SV=1	3.50972e+07	358135
1025_1	tr|A0A068WXW3|A0A068WXW3_ECHGR	2.57359	NA	53538.9	QYVWLEK	1	1	1	0.0148	13925	tr|W6UZE3|W6UZE3_ECHGR	Purple acid phosphatase OS=Echinococcus granulosus OX=6210 GN=EGR_06115 PE=3 SV=1	134440	7075.78
1027_1	tr|A0A068W8M0|A0A068W8M0_ECHGR	10.4053	NA	65569	EGVDAAISK;FAAETWVLK;LHFIFR;THLFTFVTR	1;1;1;1	4	4	0.0557	9657;19162;6680;22957	tr|W6UBD4|W6UBD4_ECHGR	Calnexin OS=Echinococcus granulosus OX=6210 GN=EGR_06707 PE=3 SV=1	3.41562e+06	100459
174_1	tr|W6USC9|W6USC9_ECHGR	2.92498	NA	363762	FIYQLLR	1	1	1	0.0021	13247	tr|A0A068WG06|A0A068WG06_ECHGR	Protein unc-79 OS=Echinococcus granulosus OX=6210 GN=EGR_00500 PE=4 SV=1	0	0
94_1	tr|W6UZG5|W6UZG5_ECHGR	7.62438	NA	112149	DAWWFR;ISSASLNGLDDIDK	1;1	2	2	0.0196	9193;41927	tr|A0A068WXZ5|A0A068WXZ5_ECHGR	Sodium/potassium/calcium exchanger 6 OS=Echinococcus granulosus OX=6210 GN=EGR_06145 PE=4 SV=1	143363	3675.97
361_1	tr|W6UFZ8|W6UFZ8_ECHGR	41.7328	NA	30367	AQMPFNQLPVLEVTTPR;KVDSFK;LLYFNIR;LVEAEHVHEYMDAIEMALK;LVLNAAEK;LVLNAAEKDFQDVR;SRPLTDF;TFGLYSDDAAEVYLIER;VMLTESMAIAR;VSSTEWPSLK	1;1;1;1;1;1;1;1;1;1	10	12	0.403	56964;56965;1176;12490;62792;62793;8011;48555;6801;57466;29357;23702	tr|A0A068WGU0|A0A068WGU0_ECHGR	Glutathione S-transferase class-mu isozyme OS=Echinococcus granulosus OX=6210 GN=EGR_04787 PE=3 SV=1	3.63732e+07	2.27333e+06
1257_1	tr|A0A068WEM0|A0A068WEM0_ECHGR	8.54042	NA	8149.07	IDNIDPEDLK;SPVQLGH	1;1	2	2	0.2394	26163;1838	-	Expressed protein OS=Echinococcus granulosus OX=6210 GN=EgrG_000594600 PE=4 SV=1	3.40376e+06	850940
130_1	tr|U6FR98|U6FR98_ECHGR	89.8591	NA	61459.2	AGNATSTATPSTASAVEIK;AGNATSTATPSTASAVEIKEDLTLPTAIR;DGTGLLQCLLAGDLPR;DLGEFVGK;DVCLYPR;EFGTCSHGGYGLGFER;EGIDPTPYYWYTQQR;EGTDPFVFGDDIPELPER;FCTWMLGQDHIR;FPTTLKPFYMQR;GFTEVHPPTLVQTQVEGGSTLFK;IRDLGEFVGK;ITALVAIIGDAFR;LGDDKLGDGSK;LGDGSKENPFK;QLMFIILR;TADGLTLSTESSIFVK;TDDIMHESIYIDDPDAEER;VQVFGWAHR	1;1;1;1;1;1;1;1;1;1;1;1;1;1;1;1;1;1;1	19	30	0.4393	52696;70252;50709;8395;11549;52606;52605;56359;56360;59132;59131;47085;45746;45749;66358;66356;66357;23718;37375;37374;21794;21792;27505;27504;17384;49891;63356;63355;21455;21453	-	Asparagine--tRNA ligase OS=Echinococcus granulosus OX=6210 GN=EGR_10502 PE=4 SV=1	1.88659e+07	650548
933_1	tr|W6UN77|W6UN77_ECHGR	2.11691	NA	91086.4	RLLNIR	1	1	1	0.0073	4166	tr|A0A068WBU1|A0A068WBU1_ECHGR;tr|W6UN80|W6UN80_ECHGR	Uncharacterized protein OS=Echinococcus granulosus OX=6210 GN=EGR_02715 PE=4 SV=1	53186.1	1477.39
139_1	tr|U6IZC6|U6IZC6_ECHGR	41.4778	NA	22082.2	ATSWVNELR;FEIWDTAGQER;GAHAAVVVYDITNLQSFER;LGATPDRPAGGSTK;LSTNVMELFK;LVLLGESAVGK;MIAESLPLSEPPLTNSGATR;YAQENGLLFK;YHSLAPMYYR	1;1;1;1;1;1;1;1;1	9	13	0.5672	19934;19874;36910;60243;60242;35632;26882;20498;60162;60163;27005;27002;34065	-	Ras protein rab OS=Echinococcus granulosus OX=6210 GN=EGR_01000 PE=4 SV=1	5.99718e+07	4.61321e+06
974_1	tr|U6JF89|U6JF89_ECHGR	10.5197	NA	12597.2	FVESYVTSLFANALSGR;VSGAAPAVECAPESK	1;1	2	2	0.2645	54897;43095	-	60S acidic ribosomal protein P1 OS=Echinococcus granulosus OX=6210 GN=EGR_08458 PE=3 SV=1	0	0
427_1	tr|A0A068WSV4|A0A068WSV4_ECHGR	3.57287	NA	15666	AHNPAVLGLCLR	1	1	2	0.0833	35293;35292	tr|W6UK15|W6UK15_ECHGR	Elongin b OS=Echinococcus granulosus OX=6210 GN=EgrG_001098900 PE=4 SV=1	43776.2	4377.62
717_1	tr|A0A068WMW6|A0A068WMW6_ECHGR	12.5565	NA	41294.5	LLGDSTNIELGATK;SINFQFTVIR;TLQELSLTFR	1;1;1	3	3	0.0939	41113;29545;28535	tr|W6UGY5|W6UGY5_ECHGR	Syntaxin 16 OS=Echinococcus granulosus OX=6210 GN=EGR_04821 PE=3 SV=1	107373	4880.58
1396_1	tr|W6UDM7|W6UDM7_ECHGR	17.0529	NA	43240.9	AKPGKENIEVK;KPSPVNAIDYEK;SPILLQTMR;VVAFAYPGPDEK	1;1;1;1	4	6	0.1137	28863;28864;37407;37409;18787;33627	tr|A0A068W6X0|A0A068W6X0_ECHGR	DUF5734 domain-containing protein OS=Echinococcus granulosus OX=6210 GN=EGR_05996 PE=4 SV=1	2.82485e+06	128402
1394_1	tr|A0A068W6Y0|A0A068W6Y0_ECHGR	28.0059	NA	31968.5	DLHHICVLNK;FCVDLIDAMER;GKDILIVEDIVDSGK;GTLIPISTDFVR;VASEIVEHYEK;VGLEYFAVSEGAVNHAAEESKPST;VQHIIAICVLK	1;1;1;1;1;1;1	7	11	0.3322	31059;37842;48140;48135;48139;35171;34253;34251;66565;33701;33702	-	Hypoxanthine phosphoribosyltransferase OS=Echinococcus granulosus OX=6210 GN=EgrG_000758800 PE=3 SV=1	5.75905e+06	443004
425_1	tr|W6V019|W6V019_ECHGR	41.0726	NA	84479.7	AKPGGVASSQLSNSGLAAAEEEDREK;EYQVTEFK;ITSHHSLPDISSSQSR;KPQNEPLLGQDER;RTHQAHTVILLEGEK;STGLLLYK;THQAHTVILLEGEK;TVLPVRPTNGIALPVIPTGGVILK;VSHQPVTSEDLFTRPQEISYSEDHLSCR;WYQMSWFR	1;1;1;1;1;1;1;1;1;1	10	12	0.1911	67784;67785;67789;17827;52069;45552;51531;9927;47477;65774;72160;28248	-	Uncharacterized protein OS=Echinococcus granulosus OX=6210 GN=EGR_00706 PE=4 SV=1	5.99883e+06	133307
711_1	tr|W6UDW6|W6UDW6_ECHGR	7.36909	NA	156905	LAVVEMLLK;NLTTVGGGGEGNGTGR	1;1	2	2	0.017	16461;41857	tr|A0A068WZS7|A0A068WZS7_ECHGR	Poly [ADP-ribose] polymerase OS=Echinococcus granulosus OX=6210 GN=EGR_05951 PE=4 SV=1	464196	6928.29
976_1	tr|A0A068WKJ9|A0A068WKJ9_ECHGR	40.8622	NA	61529.3	DLKPENLLLASK;FYFDQVIPK;GTLVEGCDFHK;HGVWQNVHVHR;HQWIFQPER;ITAAEALK;LTQFTDK;SDVLYTQQTEETR;STLSSATSAASAK;TTIQNPTVHLLSEDAACIAYIR	1;1;1;1;1;1;1;1;1;1	10	12	0.2095	36327;36326;25230;31854;31855;37860;30519;5833;7715;47278;26872;66509	-	Calcium/calmodulin-dependent protein kinase OS=Echinococcus granulosus OX=6210 GN=EgrG_000595500 PE=3 SV=1	4.00747e+06	138188
713_1	tr|W6UW68|W6UW68_ECHGR	58.4982	NA	28425.9	ALPFWFDSIVPAIK;AYDISPPPLEVSDK;AYDISPPPLEVSDKR;FCGWHDADLSPK;FLDNVSDKDIVELNIPTGIPLVYELDK;HGESVYNQENR;HYYLADDATVAAAISSVANQGK;LLDIECIPVTECLK;LLDIECIPVTECLKDTVER;MYGGLQGLNK;NLRPVK;TLNHVLEVNDLHWIPVYK;VLITAHGNSLR;WPGLEEK	1;1;1;1;1;1;1;1;1;1;1;1;1;1	14	22	0.6853	48213;45818;50361;50362;41126;41127;71123;35881;35932;35880;63394;63401;50844;64109;20181;1304;62172;62189;62170;26891;26833;8046	tr|A0A068WB02|A0A068WB02_ECHGR	PGAM OS=Echinococcus granulosus OX=6210 GN=EGR_00140 PE=2 SV=1	1.45334e+07	807410
970_1	tr|W6U2P3|W6U2P3_ECHGR	36.5585	NA	21320.1	AIELLDNLLK;ATVAAFAASEGHAHPR;CPDLQPAK;EQNSPIYISR;EVYEHIYETVDVSSSESVR;GDQLLSVNGISVENENHER;ILQSDFFSMVR;RGDQLLSVNGISVENENHER;VLDEMEAR	1;1;1;1;1;1;1;1;1	9	11	0.5312	24246;47921;11882;28516;28460;62788;62786;60699;36417;63438;13744	tr|A0A068WK07|A0A068WK07_ECHGR	Uncharacterized protein OS=Echinococcus granulosus OX=6210 GN=EGR_09757 PE=3 SV=1	8.56339e+06	535212
972_1	tr|U6JGP3|U6JGP3_ECHGR	7.28798	NA	20107.8	KIENVPTGPHNRPK;TAENFR	1;1	2	2	0.1081	47758;1824	-	Peptidyl-prolyl cis-trans isomerase OS=Echinococcus granulosus OX=6210 GN=EGR_03893 PE=3 SV=1	1.35185e+06	96560.7
1589_1	tr|A0A068WLM3|A0A068WLM3_ECHGR	14.0926	NA	56794.9	HSLDIEGLFTEIK;HSLDIEGLFTEIKR;LVVPQAAELFANEAIYGENTR	1;1;1	3	4	0.0663	44460;44458;49589;64145	tr|W6U1P0|W6U1P0_ECHGR	Protein TFG OS=Echinococcus granulosus OX=6210 GN=EGR_10188 PE=4 SV=1	2.97864e+06	229126
1129_1	tr|U6JAH9|U6JAH9_ECHGR	32.4084	NA	18219.2	AGREDPPPAFTASGISAPR;EDPPPAFTASGISAPR;FDPSTGK;FLLFCDFVR;GFVEFLEGR;GIEDPAEAAATLK;GMDPNRVDIEFR;SMVENATPQLR	1;1;1;1;1;1;1;1	8	11	0.4706	55803;48414;2534;29060;18410;33230;33228;41923;41922;30795;30864	-	Tubulin polymerization promoting protein family OS=Echinococcus granulosus OX=6210 GN=EGR_08879 PE=3 SV=1	1.93546e+07	1.29031e+06
728_1	tr|U6FTU7|U6FTU7_ECHGR	28.3104	NA	56658.7	ETLSNGDPSR;FTLSENWLPR;IGIDACLSGWAAQER;KLNVAIQLDR;NSAVEGCPQPGWR;SESPPFQHAYLYFFR	1;1;1;1;1;1	6	6	0.1398	19918;31882;49282;26078;42361;55580	-	Ubiquitin carboxyl terminal hydrolase 5 (Fragment) OS=Echinococcus granulosus OX=6210 GN=EgrG_000095700 PE=4 SV=1	5.56911e+06	242135
1745_1	tr|U6J921|U6J921_ECHGR	23.0331	NA	26468.7	IELDILGIK;NLHEQAINQTTR;QQIDQFEEILK;SAAAASQGSTGAILDLK;YHAIILSTK	1;1;1;1;1	5	7	0.2397	16344;40742;40740;39018;39148;47014;17962	-	Syntaxin-7 OS=Echinococcus granulosus OX=6210 GN=EGR_05134 PE=4 SV=1	9.57049e+06	797541
180_1	tr|A0A068WZM6|A0A068WZM6_ECHGR	3.37947	NA	55825.7	IVTSFVIGTK	1	1	1	0.0198	19176	tr|W6U576|W6U576_ECHGR	Acetyl-CoA deacylase OS=Echinococcus granulosus OX=6210 GN=EGR_08830 PE=3 SV=1	0	0
1747_1	tr|U6JJE1|U6JJE1_ECHGR	7.51155	NA	40121.2	GFWLSGR;LDELSNWIIDGK	1;1	2	2	0.0525	6112;39634	-	Mitochondrial trans 2 enoyl coenzyme A reductase OS=Echinococcus granulosus OX=6210 GN=EGR_09361 PE=4 SV=1	1.84287e+06	96993.3
182_1	tr|W6UJK0|W6UJK0_ECHGR	21.6659	NA	19780.8	ICEIFR;LSPCFVQWLMTR;RGVVNMSFEQFLGAAFNISTPGH;SFSALDVQR;SGSIDLNEFSSALQHFGYR	1;1;1;1;1	5	8	0.4012	6875;46148;46146;66431;16787;61067;61065;61081	-	Sorcin OS=Echinococcus granulosus OX=6210 GN=EGR_06829 PE=4 SV=1	8.04069e+06	1.34011e+06
423_1	tr|A0A068WN70|A0A068WN70_ECHGR	157.133	NA	110536	AFDDKLTR;ALLGEGR;ANNTLSQQQQR;DFLELMGNIADLEHK;DLEQGQLQR;DLKPENMLLTSTGYIK;EGEDGHHLYVAAEGEYEVWK;EYVDLEHLQSQGGQLK;FLSSVPLLK;FSLACVIEAFDYLHHQGIIYR;GIEAYDLSHHK;HSIVEGCYVIR;IADVLEAQFHPDGECIIR;KDFLELMGNIADLEHK;KLYAHEYQVSSNLHLTDLER;LCDFGFAK;LGVSAEPTIAVQSTAPVEIK;LSEDDPTVTLTAASPTSLDQLLGQHDVK;LSSVLEQHIGECDTWK;LYAHEYQVSSNLHLTDLER;NLDAVQLQEIVSCMYK;NPPAIAESLLMR;NQTLQSPFHPK;QDEQADSFFIIQSGEVR;QILMSVDNCFICK;RLDELH…	1;1;1;1;1;1;1;1;1;1;1;1;1;1;1;1;1;1;1;1;1;1;1;1;1;1;1;1;1;1;1;1;1;1	34	49	0.4435	13917;783;33314;51876;51874;20535;53938;64335;64334;54496;54495;15905;67327;32272;32273;35900;60137;55169;55170;65658;65657;13478;13476;58568;70645;55963;55962;63833;63832;56240;34772;33872;33874;57626;57226;57627;48751;36314;36313;60141;62736;62738;18942;6276;19456;19455;8528;38915;23142	-	cGMP-dependent protein kinase OS=Echinococcus granulosus OX=6210 GN=EgrG_000158500 PE=3 SV=1	4.34364e+07	789753
1392_1	sp|P14088|PPIA_ECHGR	52.0681	NA	17343.4	ALCTGEK;CFFDISIGGKPAGR;DMEAVGSSSGK;FEDENFNHK;HSKPMMLSMANAGK;HVVFGEVESGEDVVK;HVVFGEVESGEDVVKDMEAVGSSSGK;IIPGFMCQGGDFTAGNGTGGK;NTNGSQFFITTAVTSWLDGK;SIYGSKFEDENFNHK;TSQEVLITDCGQL;TVENFR	1;1;1;1;1;1;1;1;1;1;1;1	12	22	0.8395	3851;45572;45573;19307;26792;26794;26793;44479;48811;68602;68601;68598;60179;60181;60178;60180;62113;62114;53718;53717;42669;3211	-	Peptidyl-prolyl cis-trans isomerase OS=Echinococcus granulosus OX=6210 GN=CYP-1 PE=2 SV=2 >tr|U6JRP2|U6JRP2_ECHGR Peptidyl-prolyl cis-trans isomerase OS=Echinococcus granulosus OX=6210 GN=EGR_03303 PE=3 SV=1	6.6046e+07	5.50384e+06
1049_1	tr|W6UAE9|W6UAE9_ECHGR	3.57287	NA	24577.5	YSFMFQVLK	1	1	1	0.0419	25599	-	Transmembrane emp24 domain-containing protein 7 OS=Echinococcus granulosus OX=6210 GN=EGR_06780 PE=3 SV=1	0	0
184_1	tr|A0A068WLW9|A0A068WLW9_ECHGR	46.4953	NA	121076	EALNYLPLTEATK;ELAEQAISAK;ESDFTGTR;FALSAVTSAGR;FHGPFAYLPGR;IRPVEASWGPVQK;KDDTGVPVIAVSR;KVIDPVSAGEVIEADGYTVR;LLADFTSLSR;LSVWFAPPK;TETDEVVMTGYR;VTWFYHGR;YHLIAGPDPK	1;1;1;1;1;1;1;1;1;1;1;1;1	13	15	0.1336	42620;18853;10919;20129;31818;42844;42843;37198;60864;23025;17908;39516;19207;19204;22193	-	Cell adhesion molecule OS=Echinococcus granulosus OX=6210 GN=EgrG_000644850 PE=4 SV=1	1.51147e+07	256181
137_1	tr|A0A068X197|A0A068X197_ECHGR	5.93588	NA	121439	FEEPGLFR;VLQDFSEGK	1;1	2	2	0.0156	15427;16785	tr|W6UPG4|W6UPG4_ECHGR	Inositol polyphosphate 5 phosphatase OCRL 1 OS=Echinococcus granulosus OX=6210 GN=EgrG_000933200 PE=3 SV=1	776878	12530.3
1125_1	tr|A0A068WXK2|A0A068WXK2_ECHGR	40.7159	NA	46962.1	ALQQLLVEGK;ETEAPTTSAPPVK;HENLHQFYSQLIGSTQDYVAEVK;IEPIVDSEWSFEEVK;KNLFNFAK;QHHSSLVFEAWK;SGDIVLVHSAGGGVGTAIGQLAK;SLGLLQPLGR;VAEVGEGVTK	1;1;1;1;1;1;1;1;1	9	13	0.2831	21410;35628;68874;68873;53514;14766;42918;42919;42058;42057;60620;18438;15124	tr|W6UTS2|W6UTS2_ECHGR	Synaptic vesicle membrane protein VAT 1 OS=Echinococcus granulosus OX=6210 GN=EgrG_000935200 PE=3 SV=1	2.94791e+07	1.13381e+06
1390_1	tr|A0A068WX68|A0A068WX68_ECHGR	6.69055	NA	49837.6	LLQLIQLR;SLSQFIFAPAK	1;1	2	2	0.0425	15565;28604	-	PIP49_C domain-containing protein OS=Echinococcus granulosus OX=6210 GN=EgrG_001159000 PE=3 SV=1	1.18245e+06	51411
421_1	tr|A0A068WI73|A0A068WI73_ECHGR	31.9276	NA	90985.1	EFITLEAINVK;GELIGHTSDVR;LMTNAVAADAGR;MATSLLLFTAPK;QAGLESSNISK;SEGQIMVIR;SLALLDVDR;VGDVVGSAEHSASGSNR	1;1;1;1;1;1;1;1	8	9	0.1107	32668;27009;27409;33637;23701;17307;15792;48774;48772	tr|W6URW5|W6URW5_ECHGR	Phospholipase A 2 activating protein OS=Echinococcus granulosus OX=6210 GN=EgrG_000477800 PE=3 SV=1	8.56056e+06	219502
1710_1	tr|U6JE92|U6JE92_ECHGR	12.0068	NA	36900.8	LLEELPTSVVNSK;LMLAEAIHQYR;VSGLVLLK	1;1;1	3	3	0.0964	40967;36518;6459	-	Eukaryotic translation initiation factor 3 OS=Echinococcus granulosus OX=6210 GN=EGR_04057 PE=4 SV=1	480824	26712.4
722_1	tr|W6UHH3|W6UHH3_ECHGR	21.8404	NA	28744.1	LAFNHGGAIEFGK;LLITYDGCK;LTLSGSGQQPNGR;SLLELGTR;YSGTAYLTSHR	1;1;1;1;1	5	8	0.2045	37465;37405;37404;20314;34971;9623;31472;31469	tr|A0A068WZ08|A0A068WZ08_ECHGR	WW domain-binding protein OS=Echinococcus granulosus OX=6210 GN=EGR_04712 PE=4 SV=1	6.05615e+06	672906
1741_1	tr|U6IZE6|U6IZE6_ECHGR	24.1045	NA	11716.8	KLEFFDATK;LEFFDATK;MGYSATPYTFSAGNVFGTHTHDAEK;PEFVVHHWDEAEDGVLSR;SGDALEIPK	1;1;1;1;1	5	8	0.581	21387;21386;14148;68691;68690;60961;60960;11944	-	Cupin 2 barrel domain containing protein OS=Echinococcus granulosus OX=6210 GN=EGR_02662 PE=4 SV=1	1.30288e+07	2.17147e+06
979_1	tr|W6UUU7|W6UUU7_ECHGR	22.3507	NA	21658.3	ANVILSDETK;ANVILSDETKK;DATPEEIR;GDGSTGQPISSEPIVLPPPSDYT;KEIYDK;VSPPVSPGAASTESR	1;1;1;1;1;1	6	7	0.3147	20812;29144;29143;11985;64250;4705;41584	-	DnaJ subfamily C member protein OS=Echinococcus granulosus OX=6210 GN=EGR_00970 PE=4 SV=1	7.01261e+07	6.3751e+06
1743_1	tr|U6J8Y9|U6J8Y9_ECHGR	56.3303	NA	47167.3	ASVVNEETADGVK;EQLSNNGQSSLISQNLLK;FLSTLHSHIK;GQLSIIVDGNKPFK;IDVPVSPGITGR;LDETILSSLPPGFPVR;LDTTLLDFK;LQGNDLYIGR;NADLNQINK;NADLNQINKR;QGYLLFR;TCLIDHEHR	1;1;1;1;1;1;1;1;1;1;1;1	12	16	0.3153	35149;57725;26954;45139;45138;28717;51761;19233;24673;17133;27164;27165;27163;10008;26806;26810	-	Ankyrin repeat containing protein OS=Echinococcus granulosus OX=6210 GN=EGR_04377 PE=4 SV=1	9.76023e+06	348580
1581_1	tr|W6UUP8|W6UUP8_ECHGR	19.5906	NA	16322.6	ADRDESSPYAAMLAAQDVAER;ALGIGALHVR;TPSPAAQSALR;VQAEEQLSLK	1;1;1;1	4	4	0.3421	63416;16050;21392;24443	-	40S ribosomal protein S14 OS=Echinococcus granulosus OX=6210 GN=EGR_03118 PE=3 SV=1	8.30313e+06	1.18616e+06
1526_1	tr|W6V1C1|W6V1C1_ECHGR	2.01577	NA	117288	NIQALR	1	1	1	0.0059	739	tr|A0A068WC96|A0A068WC96_ECHGR	Insulin-degrading enzyme OS=Echinococcus granulosus OX=6210 GN=EGR_05548 PE=3 SV=1	1.17786e+07	196310
1704_1	tr|W6UUG4|W6UUG4_ECHGR	2.30306	NA	28531.4	SYLAFVLR	1	1	1	0.0315	14072	-	Uncharacterized protein OS=Echinococcus granulosus OX=6210 GN=EGR_00870 PE=4 SV=1	4.19779e+06	322907
1088_1	tr|U6JA54|U6JA54_ECHGR	45.6517	NA	18492.6	DGEIDFSEFVK;DGNGYITVDEMR;ESFDLFDK;ESFDLFDKDGNGR;LTDEEVKDMIK;LVDLNRDGEIDFSEFVK;SADMDGDGQVNFEEFSLVMNQR;SVMSSLSQNVTDAEVQQMIR;VFDRDGNGYITVDEMR	1;1;1;1;1;1;1;1;1	9	16	0.6188	33209;37944;37947;15715;44395;44392;44391;44393;44394;35270;58206;66524;62700;62701;55542;55541	-	Calmodulin OS=Echinococcus granulosus OX=6210 GN=EGR_09570 PE=4 SV=1	1.44889e+07	1.31718e+06
1164_1	tr|A0A068WI26|A0A068WI26_ECHGR	28.3531	NA	27890.6	DGFLLLVDR;FDFNASEPEELSFHR;GDQQSQMVQR;GDVIEVLGQEDENWWR;KFDSINQLIDYHR;NTAEECLLETDPYTGLPVQPDGAFVVR;YFVWLR	1;1;1;1;1;1;1	7	8	0.3934	18065;53980;53982;26577;57045;49373;70853;9343	tr|W6U2U7|W6U2U7_ECHGR	Growth factor receptor bound protein 2 OS=Echinococcus granulosus OX=6210 GN=EgrG_000587600 PE=4 SV=1	3.46455e+06	247468
1166_1	tr|U6JJM1|U6JJM1_ECHGR	3.03506	NA	11070.5	TFLLFR	1	1	1	0.0625	4765	-	Dynein light chain OS=Echinococcus granulosus OX=6210 GN=EGR_05428 PE=3 SV=1	570479	190160
1114_1	tr|A0A068WAA8|A0A068WAA8_ECHGR	5.25985	NA	73530.2	VLISLPLTSELTEK	1	1	1	0.0221	46378	tr|W6V2C7|W6V2C7_ECHGR	Cullin OS=Echinococcus granulosus OX=6210 GN=EgrG_000769800 PE=3 SV=1	0	0
938_1	tr|U6JEC1|U6JEC1_ECHGR	29.7851	NA	21877.7	AQHPLLPHTAGR;QAVDVSPLR;SLCPIVER;TISECLADELINASK;VCNSLMMHGR;VNQAIHLLCTGAR;WQSDNINFSEFGLVDHIQIK	1;1;1;1;1;1;1	7	11	0.4485	33943;33944;33991;14927;14318;49761;49789;28314;42118;65288;65286	-	40S ribosomal protein S5 OS=Echinococcus granulosus OX=6210 GN=EGR_01809 PE=3 SV=1	4.30522e+06	391384
1706_1	tr|A0A068WZL2|A0A068WZL2_ECHGR	5.25985	NA	28961.2	VTPAEPEGVITQLK	1	1	1	0.0519	43539	-	Expressed conserved protein OS=Echinococcus granulosus OX=6210 GN=EgrG_001088900 PE=4 SV=1	702761	70276.1
1685_1	tr|A0A068WZ53|A0A068WZ53_ECHGR	13.5849	NA	16027.9	GHAVGDIPGVR;KGHAVGDIPGVR;VANVSLLALYK	1;1;1	3	3	0.1586	20008;28404;27475	tr|W6UTD6|W6UTD6_ECHGR	40S ribosomal protein S23 OS=Echinococcus granulosus OX=6210 GN=EgrG_000694380 PE=3 SV=1	2.83446e+06	314940
1168_1	tr|A0A068WEU5|A0A068WEU5_ECHGR	14.1632	NA	65328.5	ENLGIIVQYR;ITAYLSK;LKNEDTNLASSTIILNPTQK;YGREDLDVLGLSFR	1;1;1;1	4	4	0.0854	28343;4720;62362;49107	-	Beta arrestin 1 OS=Echinococcus granulosus OX=6210 GN=EgrG_000855900 PE=3 SV=1	5.81175e+06	242156
1116_1	tr|A0A068WBT8|A0A068WBT8_ECHGR	20.5001	NA	22312.3	AQEYSLDER;DSINYLDHINGK;EYTIDLESNLNK;STEELEALR;TGPGSSQAGYYCEVCDCVVK	1;1;1;1;1	5	5	0.3229	22150;38933;41401;18047;62912	tr|W6USE8|W6USE8_ECHGR	Zinc finger matrin type 2 OS=Echinococcus granulosus OX=6210 GN=EGR_03778 PE=4 SV=1	2.29335e+07	2.08486e+06
1700_1	tr|U6J6L6|U6J6L6_ECHGR	36.5376	NA	61671.7	DLNLGDFVIK;FNTTCSSVDKLDK;GLSPETVDLIGHYTR;IVYEVLR;LANSTVIQETLR;LIYNLEDQGGELLSLR;LLAISEMLAR;LQLAQELWDAK;YDLTVPFAR	1;1;1;1;1;1;1;1;1	9	9	0.1866	23714;45067;49587;9778;36528;54209;22616;34912;20253	-	Histidine--tRNA ligase OS=Echinococcus granulosus OX=6210 GN=EGR_00838 PE=3 SV=1	3.22305e+06	89529.3
1702_1	tr|U6J1U6|U6J1U6_ECHGR	35.132	NA	17529	AAEHTALYALK;ADLAEEYQK;ADLAEEYQKDR;GQICFPLIDPGNWKPATK;ISINFGAEYPIKPPK;IVDVIQALQALVANPEIEHPLR;TPIYHPNVDEK	1;1;1;1;1;1;1	7	16	0.5641	27308;27307;27306;19263;36150;59294;59293;59298;50025;50024;50022;50021;65932;65931;65933;34802	-	Ubiquitin-conjugating enzyme E2 L3 OS=Echinococcus granulosus OX=6210 GN=EGR_00906 PE=4 SV=1	2.4374e+07	2.70822e+06
5_2	tr|A0A068WH46|A0A068WH46_ECHGR	15.7795	NA	244431	AEGLPPMNTDIITSIK;AFDIDPAEVK;AFNLHPADPTGLADPYLIVSMGK;AIGSVTVNLATLAQK;ALAGLGDPDAEETR;ALIDPTILK;ATCGLAQTYYSHSYAQWR;CFCEPNIIIK;CIIYNTAEVVLNDTSLFSNEK;DDEDISLEGNQLVPK;DIYYSASDEER;DNKLPTEILSDLCQK;DSELSTR;DWEAVKDETIATHLIDLK;DYLAYK;EFYADTTIVDETESTKK;EVQDDLIITSAGIDTSLIER;FFSFEYFLPR;FGHPLADLHHVR;FRDSELSTR;FVFPFNYMR;FYTNNPYYNK;GADYQPPPLQWWQIYR;GEPKLLLK;GKQDDDDMTAEER;GLPEGYDPECVSGVDPPK;GLPGVNVNPMVEITAAGK;GTPP…	0;0;0;0;0;0;0;0;0;0;0;0;0;0;0;0;0;0;0;0;0;0;0;0;0;0;0;1;0;0;0;0;0;0;0;0;0;1;0;0;0;0;0;0;0;0;0;0;0;0;0;0;1;0;0;0;0;0;0;0;0;0;0;0;0;0;0;0;0;0;0;0;0;0;0;0;0;0;0;0;0;0;0;0;0;0;0;0;0;0;0	3	4	0.5102	50742;21797;65782;65783;43718;43719;40169;14885;61761;61760;33670;33669;65814;65815;49947;36678;52628;52616;5299;60375;60376;60377;3503;57777;57776;62123;36985;39414;39413;39415;22171;22172;29293;29292;35386;35458;58792;58790;58788;10069;44812;44811;56344;56343;52448;52449;26947;26946;63612;63614;59808;59807;9034;8204;65048;65046;30023;30022;12095;28165;28167;72423;72424;72422;72421;72428;68223;7…	-	Otoferlin OS=Echinococcus granulosus OX=6210 GN=EgrG_000436000 PE=4 SV=1	3.39053e+07	258819
5_1	tr|W6V8E9|W6V8E9_ECHGR	5.25985	NA	244570	AEGLPPMNTDIITSIK;AFDIDPAEVK;AFNLHPADPTGLADPYLIVSMGK;AIGSVTVNLATLAQK;ALAGLGDPDAEETR;ALIDPTILK;ATCGLAQTYYSHSYAQWR;CFCEPNIIIK;CIIYNTAEVVLNDTSLFSNEK;DDEDISLEGNQLVPK;DIYYSASDEER;DNKLPTEILSDLCQK;DSELSTR;DWEAVKDETIATHLIDLK;DYLAYK;EFYADTTIVDETESTKK;EVQDDLIITSAGIDTSLIER;FFSFEYFLPR;FGHPLADLHHVR;FRDSELSTR;FVFPFNYMR;FYTNNPYYNK;GADYQPPPLQWWQIYR;GEPKLLLK;GKQDDDDMTAEER;GLPEGYDPECVSGVDPPK;GLPGVNVNPMVEITAAGK;GWWP…	0;0;0;0;0;0;0;0;0;0;0;0;0;0;0;0;0;0;0;0;0;0;0;0;0;0;0;0;0;0;0;0;0;0;1;0;0;0;0;0;0;0;0;0;0;0;0;0;0;0;0;0;0;0;0;0;0;0;0;0;0;0;0;0;0;0;0;0;0;0;0;0;0;0;0;0;0;0;0;0;0;0;0;0;0;0;0;0;0	1	2	0.4921	50742;21797;65782;65783;43718;43719;40169;14885;61761;61760;33670;33669;65814;65815;49947;36678;52628;52616;5299;60375;60376;60377;3503;57777;57776;62123;36985;39414;39413;39415;22171;22172;29293;29292;35386;35458;58792;58790;58788;10069;44812;44811;56344;56343;52448;52449;63612;63614;59808;59807;9034;8204;65048;65046;30023;30022;12095;36761;36762;28165;28167;72423;72424;72422;72421;72428;72047;7…	-	Otoferlin OS=Echinococcus granulosus OX=6210 GN=EGR_02235 PE=4 SV=1	1.9649e+06	14663.5
1110_1	tr|A0A068WKH9|A0A068WKH9_ECHGR	5.25985	NA	51726.6	IYNASEEELGEGR	1	1	1	0.027	42810	tr|W6U4E7|W6U4E7_ECHGR	Oxalate:formate antiporter OS=Echinococcus granulosus OX=6210 GN=EgrG_000586900 PE=4 SV=1	0	0
307_1	tr|A0A068W9Z7|A0A068W9Z7_ECHGR	50.6719	NA	43108.7	AASFVNR;DLKPSNLLINANCDLK;DVILVGDTLETMK;FKHENIIDIR;FLTYSK;ICDFGLAR;ISVEDALK;LLAFNPASR;QPLFPGK;QQLQATR;SATFEVGPNYVDFK;SQAISNDHICYFLYQILR;STPFEHQTFCQR;YIHSANVIHR	1;1;1;1;1;1;1;1;1;1;1;1;1;1	14	17	0.3887	3171;54086;54087;41209;33173;2856;13171;8900;15135;4260;7285;47379;62986;46123;46124;28654;28655	-	Mitogen-activated protein kinase OS=Echinococcus granulosus OX=6210 GN=EgrG_000891000 PE=3 SV=1	1.82359e+07	675404
1293_1	tr|W6UAI7|W6UAI7_ECHGR	5.25985	NA	41993.3	GTWYGALIALR	1	1	1	0.0283	29319	tr|A0A068WU06|A0A068WU06_ECHGR	N(4)-(Beta-N-acetylglucosaminyl)-L-asparaginase OS=Echinococcus granulosus OX=6210 GN=EGR_09692 PE=3 SV=1	0	0
1291_1	tr|W6UI44|W6UI44_ECHGR	5.25985	NA	20890.3	TGLIEENFVLVPR	1	1	1	0.0691	43773	tr|A0A068WI70|A0A068WI70_ECHGR	Proteasomal ubiquitin receptor ADRM1 OS=Echinococcus granulosus OX=6210 GN=EGR_07335 PE=4 SV=1	5.09225e+06	462932
1087_1	tr|A0A068WGF0|A0A068WGF0_ECHGR	35.5122	NA	63427.2	AGPNVDTNGK;ASQAYHSLQVK;EVVDDLSCEIQSLESTQK;LLCMEGTIPVK;LQDFTFENGQTSK;VDYDSVVDTTRPVYR;YMGNVYNIPLAVYFVR	1;1;1;1;1;1;1	7	12	0.164	14299;14300;29947;29951;60066;60065;31773;45105;45103;52912;52913;56423	tr|W6U800|W6U800_ECHGR	Tumor susceptibility gene 101 protein OS=Echinococcus granulosus OX=6210 GN=EgrG_000664100 PE=3 SV=1	1.47699e+07	615411
526_1	tr|W6US60|W6US60_ECHGR	85.4129	NA	53131.7	AQTENAMIYHQK;ASGRPNFDLGPIATSISAR;AYAHCFYSESELK;CSMAIASAQEALK;FGLQNISESLVAK;GKVESGSDLDPCILEAYVLQSLAEAQEVTIAR;HDPGIIAPLACETAILYEK;IASNNNIEMEQAVEVYK;KDLLSK;LIPFTWTNSLDIK;MFEDLGNSR;MICSHMR;NAAGLFEHIK;NAAGLFEHIKK;RLQPYAQR;SGSGAEFCFIR;VLATMPHLQLK;YCTQAQNAAK	1;1;1;1;1;1;1;1;1;1;1;1;1;1;1;1;1;1	18	37	0.4715	41188;41237;56703;56704;56706;56726;48217;38410;39785;39787;72731;60710;60712;57255;57254;57233;57234;274;46572;46534;19368;19420;12219;21458;21459;21516;21515;21442;29685;29686;17259;29827;31215;31217;31216;25129;25067	-	BRO1 domain-containing protein BROX OS=Echinococcus granulosus OX=6210 GN=EGR_03882 PE=3 SV=1	8.09557e+07	3.37315e+06
1160_1	tr|A0A068WMH2|A0A068WMH2_ECHGR	8.83272	NA	14485.5	ALTYQYLEWK;SQLTALSEDLLSR	1;1	2	2	0.1825	34904;41165	-	Eukaryotic translation elongation factor 1 OS=Echinococcus granulosus OX=6210 GN=EgrG_000169400 PE=4 SV=1	5.42117e+06	542117
305_1	tr|W6U646|W6U646_ECHGR	50.5893	NA	48382.2	DELEDYAKK;IAPPKDMPK;ITYEDMCETLAIGMTK;KTGQPESMVDDWFK;MFEAIDTNFNGYITR;MFEAIDTNFNGYITRDELEDYAK;SANMQDFDK;SANMQDFDKESSFAR;SEEGLLEYVVSVVK;TGQPESMVDDWFK;WFDFGNTGK	1;1;1;1;1;1;1;1;1;1;1	11	33	0.2336	22158;22160;15542;16281;55241;55240;49861;49863;49862;49882;53137;53158;53156;53109;53136;53138;69368;69367;69366;69365;18521;51535;51563;46656;46654;46221;46220;46219;46820;19575;19574;19641;19642	tr|A0A068WYV6|A0A068WYV6_ECHGR	Tegumental protein OS=Echinococcus granulosus OX=6210 GN=EGR_08411 PE=4 SV=1	4.09123e+07	1.63649e+06
1395_1	tr|A0A068WG28|A0A068WG28_ECHGR	33.2942	NA	47685.2	EYIEPLR;HASEIMENLHK;LATLNTFNK;LDEEYIHCEK;QTHNPKPLQITR;QVDENWFEGR;THEYLQPNPATR;YGNELDHDSLFGECLIQTGYAFK;YNMEDQVK	1;1;1;1;1;1;1;1;1	9	12	0.2417	11352;34576;34578;16751;36026;40238;41176;41175;32840;40846;68577;16953	tr|W6USB0|W6USB0_ECHGR	Sh3 containing grb2 protein 3 OS=Echinococcus granulosus OX=6210 GN=EGR_00480 PE=3 SV=1	5.98897e+06	187155
1576_2	tr|W6U446|W6U446_ECHGR	2.90148	NA	119862	LADFGFSNTFR;LMSQLISALNTAR;TLGSGNFAK;VAIPTTHFDTPK	0;0;1;0	1	1	0.0405	32526;40342;9902;35584;35585	-	Serine/threonine-protein kinase MARK2 OS=Echinococcus granulosus OX=6210 GN=EGR_09273 PE=4 SV=1	781957	12819
594_1	tr|A0A068WPA4|A0A068WPA4_ECHGR	2.04046	NA	151620	VLISLQLNR	1	1	1	0.0066	18648	tr|W6URW7|W6URW7_ECHGR	High density lipoprotein receptor hdl OS=Echinococcus granulosus OX=6210 GN=EGR_01096 PE=4 SV=1	0	0
1162_1	tr|W6V9D2|W6V9D2_ECHGR	3.06516	NA	28268.7	LYEAER	1	1	4	0.0227	3946;3945;3944;3951	tr|A0A068WEX5|A0A068WEX5_ECHGR	Protein phosphatase 1 regulatory subunit 12A OS=Echinococcus granulosus OX=6210 GN=EGR_02008 PE=4 SV=1	5096.64	424.72
1205_1	tr|W6V098|W6V098_ECHGR	3.95308	NA	18700.7	WVPVAEDEHAQPK	1	1	1	0.0774	44650	tr|A0A068WCA3|A0A068WCA3_ECHGR	B-cell CLL/lymphoma 7 protein family member A OS=Echinococcus granulosus OX=6210 GN=EGR_00821 PE=3 SV=1	0	0
1687_1	tr|W6UPZ5|W6UPZ5_ECHGR	2.76792	NA	112429	SSTLPFFVR	1	1	1	0.0089	18423	-	Glyceraldehyde-3-phosphate dehydrogenase OS=Echinococcus granulosus OX=6210 GN=EGR_02307 PE=3 SV=1	69703.6	1161.73
1666_1	tr|U6IYP8|U6IYP8_ECHGR	3.81102	NA	24481.8	GISAASTTGK	1	1	1	0.0448	9805	-	AN1-type zinc finger protein 2B OS=Echinococcus granulosus OX=6210 GN=EGR_02155 PE=4 SV=1	1.92125e+06	120078
1664_1	tr|W6US80|W6US80_ECHGR	3.57287	NA	52084.1	TCAAQSIAESVK	1	1	1	0.0259	32016	tr|A0A068WGB5|A0A068WGB5_ECHGR	RBR-type E3 ubiquitin transferase OS=Echinococcus granulosus OX=6210 GN=EGR_00450 PE=4 SV=1	751716	34168.9
1299_1	tr|W6UW71|W6UW71_ECHGR	11.076	NA	59730.4	GPTLLEYLDK;HFILVDAPGHK;LVPFLK	1;1;1	3	3	0.0505	24683;30109;870	tr|A0A068WVV6|A0A068WVV6_ECHGR	Eukaryotic peptide chain release factor GTP-binding subunit ERF3A OS=Echinococcus granulosus OX=6210 GN=EGR_07384 PE=3 SV=1	2.4371e+06	71679.3
1207_1	tr|A0A068WFR3|A0A068WFR3_ECHGR	46.4533	NA	58124.1	AEIETEMIER;ASDCDVTVNGNK;FEILSEYFR;IIDHAIFSNGK;KSPTPDNDVFVDLAEAYSSYHPR;LYVLAFGQSSYWHK;SLLNFVLQAHSGIK;VPFVLSANIHGGALVANYPFDGSIDGQR;WLPVFLR;YFVATIHPDYFPAFWVTNVPAAPDLDR	1;1;1;1;1;1;1;1;1;1	10	12	0.3033	29290;32893;28269;29011;29012;67846;67847;50705;45668;70415;12026;71397	-	Zinc carboxypeptidase family protein OS=Echinococcus granulosus OX=6210 GN=EgrG_000421900 PE=3 SV=1	2.88253e+06	96084.3
559_1	tr|U6JF92|U6JF92_ECHGR	22.7881	NA	23083.1	AMNIGAHTR;IEDNDTLVFVVDR;KIEDNDTLVFVVDR;LPPDFDALDVANK;NKLDAFR	1;1;1;1;1	5	7	0.2077	14151;45996;49738;40176;40177;40175;8353	-	60S ribosomal protein L23a OS=Echinococcus granulosus OX=6210 GN=EGR_09320 PE=3 SV=1	8.72245e+06	969162
608_1	tr|W6UL74|W6UL74_ECHGR	25.5553	NA	45147.4	LLSDVVSTDPSR;LTEFDLR;MVEEYHEMQEELER;NFILASNSK;QHTFKDEEYEASQSK;TSQGNGTSSVGDER	1;1;1;1;1;1	6	11	0.1784	33390;9858;54700;54699;15432;15386;54040;54038;53577;53578;39241	tr|A0A068WU79|A0A068WU79_ECHGR	Uncharacterized protein OS=Echinococcus granulosus OX=6210 GN=EGR_06281 PE=4 SV=1	5.8806e+06	255678
1399_1	tr|W6V6E9|W6V6E9_ECHGR	2.43536	NA	110753	GVLLTAPGAR;LVTLDSMLPVGK;SLLAYLYK;SPYEFLQTR;TAVEDIESTPIKK;TGPQLDVIPR	0;0;1;0;0;0	1	1	0.0621	13343;32452;14182;24149;41068;41067;21211	-	5'-AMP-activated protein kinase subunit gamma-3 OS=Echinococcus granulosus OX=6210 GN=EGR_03217 PE=4 SV=1	60398.1	929.201
428_1	tr|A0A068WRI6|A0A068WRI6_ECHGR	74.7931	NA	38825.8	ADFSGITSDR;ASYPMADFVDLEVR;EELVSVLGLAPGK;EELVSVLGLAPGKDIDTIVK;HLEEMLTSDQYFDTEVVLK;IRETYTSAVSK;KTLVEANGVFIQAGSR;NDGLPNLLK;NGVFHSLESGDVR;QLDFGGDCEGSR;SLGEDLQAVADGDAK;SLGEDLQAVADGDAKK;TGIPVFMGHVVHPESK;TLVEANGVFIQAGSR;VPFETHEMVIVLPEK;VPFETHEMVIVLPEKNDGLPNLLK;VSMMTQK	1;1;1;1;1;1;1;1;1;1;1;1;1;1;1;1;1	17	23	0.5	19376;48410;34782;60355;60354;63982;31433;31434;50479;14876;40306;40308;40309;36284;43839;48523;51598;47075;52471;52472;69129;69128;6210	tr|A0A068WWA0|A0A068WWA0_ECHGR	Serine protease inhibitor OS=Echinococcus granulosus OX=6210 GN=EgrG_001193200 PE=3 SV=1	4.52567e+07	2.38193e+06
557_1	tr|A0A068WVG9|A0A068WVG9_ECHGR	57.6003	NA	63743.2	AFQLNPK;ALELDPNCEEAR;DITFLTNK;DLHADYK;DLLNDSVYVR;LDPSNVSILESLTSVR;LVDAGIIALR;NFPSAIEHYEK;NHVLYSNR;NLELLEK;QAYIDPDLAEHEK;VGQYEDALKDAEECVK;VQAHPTLK;YDNAIDCYTSAIELDPK	1;1;1;1;1;1;1;1;1;1;1;1;1;1	14	16	0.2641	5877;40259;13192;8239;27632;51489;17737;35993;15823;8068;44923;45728;54741;54740;9878;57976	tr|W6UAD5|W6UAD5_ECHGR	Stress-induced-phosphoprotein 1 OS=Echinococcus granulosus OX=6210 GN=EgrG_000264900 PE=4 SV=1	1.35982e+07	289323
1295_1	tr|W6U721|W6U721_ECHGR	2.57359	NA	66989.2	QNQDLECESSFIAINTQR	1	1	1	0.0308	61580	-	Deoxyribodipyrimidine photo-lyase OS=Echinococcus granulosus OX=6210 GN=EGR_08131 PE=4 SV=1	0	0
1709_1	tr|A0A068WMQ0|A0A068WMQ0_ECHGR	13.3917	NA	73191.4	GQFPVSDVR;GQVITYDAATGK;LGANSLLDLVVFGR	1;1;1	3	3	0.0524	15924;29478;43164	tr|W6UMX7|W6UMX7_ECHGR	Succinate dehydrogenase [ubiquinone] flavoprotein subunit, mitochondrial OS=Echinococcus granulosus OX=6210 GN=EGR_02366 PE=3 SV=1	2.73941e+06	68485.4
352_1	tr|U6J8J0|U6J8J0_ECHGR	18.2737	NA	23928.7	FMQELYR;FYEVICVDPNHSAIR;GATYGKPTNEGVNQLK;QGFVIYR;VLNSYWVGEDSTFK	1;1;1;1;1	5	5	0.2892	14991;53873;50088;9297;49234	-	Ribosomal protein L15 OS=Echinococcus granulosus OX=6210 GN=EGR_05341 PE=3 SV=1	2.52942e+06	210785
551_1	tr|W6U374|W6U374_ECHGR	5.25985	NA	59843.5	AVVFHIGYNAER	1	1	1	0.0226	38246	tr|A0A068WSC5|A0A068WSC5_ECHGR	Ubiquitin hydrolase OS=Echinococcus granulosus OX=6210 GN=EGR_10155 PE=4 SV=1	399154	13763.9
870_1	tr|A0A068X444|A0A068X444_ECHGR	22.7119	NA	28533.8	AKENENFDYK;EAIDFYTCK;LFAPPIDNTSHHPQILNLEVR;MESYYQLR;VLTLTVR;WVIFMGPK	1;1;1;1;1;1	6	10	0.248	31583;31634;31581;31631;24527;65596;20789;5019;14540;15378	tr|W6U3R3|W6U3R3_ECHGR	Expressed conserved protein OS=Echinococcus granulosus OX=6210 GN=EgrG_000131300 PE=4 SV=1	2.71722e+07	1.94087e+06
1662_1	tr|U6JI15|U6JI15_ECHGR	5.21144	NA	19799.1	IVLDQLR;LAEDFVAK	1;1	2	3	0.0843	7947;7951;9806	-	Trafficking protein particle complex subunit OS=Echinococcus granulosus OX=6210 GN=EGR_09493 PE=3 SV=1	5.55212e+06	504738
1574_1	tr|U6IYU3|U6IYU3_ECHGR	33.9742	NA	45182.1	ANDDRLEELDENIK;EYLMSLFECR;HGDVLLNR;KAEESDGETEIR;LDITFHLIR;LSQWLFEASLNR;MDALAQFR;PAESFEEEGLER	1;1;1;1;1;1;1;1	8	11	0.2174	50009;36688;11642;37579;37577;23363;23362;42685;42683;13169;39098	-	26S proteasome non-ATPase regulatory subunit 6 OS=Echinococcus granulosus OX=6210 GN=EGR_02124 PE=3 SV=1	1.98921e+07	736744
358_1	tr|A0A068WLC4|A0A068WLC4_ECHGR	3.01965	NA	28067.2	NDGSVDGYR	1	1	1	0.0366	14785	tr|W6UID2|W6UID2_ECHGR	Tubulin-folding cofactor B OS=Echinococcus granulosus OX=6210 GN=EgrG_000526900 PE=3 SV=1	0	0
1660_1	tr|W6UH23|W6UH23_ECHGR	16.624	NA	12466.8	AGLYTQGK;HFELGGDK;KQSGYGGQTKPIFR;QSGYGGQTKPIFR	1;1;1;1	4	5	0.283	6885;10324;47208;41404;40579	-	60S ribosomal protein L36a OS=Echinococcus granulosus OX=6210 GN=EGR_04871 PE=3 SV=1	4.48963e+06	748271
1254_1	tr|U6IZP9|U6IZP9_ECHGR	3.95308	NA	101504	VDLPGLLK	1	1	1	0.0086	7847	-	Importin subunit beta-1 OS=Echinococcus granulosus OX=6210 GN=EGR_00068 PE=3 SV=1	0	0
1627_1	tr|A0A068WGX8|A0A068WGX8_ECHGR	22.8536	NA	48685.6	ISQIENISHLVK;LEGLENLPR;LQTLELSR;QLDATLTGVGLR;TLYMER;VLEVLDLSYNR	1;1;1;1;1;1	6	6	0.1374	38530;17717;13601;30711;5540;35287	tr|W6UPZ9|W6UPZ9_ECHGR	Protein phosphatase 1 regulatory subunit 7 OS=Echinococcus granulosus OX=6210 GN=EGR_02312 PE=4 SV=1	6.99035e+06	249655
596_1	tr|A0A068WPK6|A0A068WPK6_ECHGR	30.9899	NA	81500.3	DNAGHYFAR;ELDDVEESK;EVLYHLDDK;FALAFHTDAIEDR;LWEALAEHIR;NIYHEANDAHFAQFSR;VNVASMYQGEDSDIYAAHR	1;1;1;1;1;1;1	7	11	0.1168	18221;18220;19076;23558;44649;44643;30353;30352;56441;56442;61020	tr|W6V035|W6V035_ECHGR	Sodium/hydrogen exchanger OS=Echinococcus granulosus OX=6210 GN=EgrG_000062500 PE=3 SV=1	3.36483e+06	116029
748_1	tr|A0A068WFZ9|A0A068WFZ9_ECHGR	14.3307	NA	10491.7	DIVYADAGTDTGPWGGR;NYAEGCGYDK;NYAEGCGYDKK	1;1;1	3	3	0.3011	52014;26569;34291	-	Expressed protein OS=Echinococcus granulosus OX=6210 GN=EgrG_000647100 PE=4 SV=1	1.29665e+06	259329
1085_1	tr|W6UMT2|W6UMT2_ECHGR	62.2134	NA	23121.7	CTELFITTIDR;DCIKEEEYATSCR;DQIQPDIR;EEEYATSCR;HWLDVMEPMDASEELSPTQGR;KLLSQFK;LNMDQLAK;MDCPGALK;NLAEVYALINTLQFLQK;NLWECMHGLSFIPSDFDGK;NLWECMHGLSFIPSDFDGKK;QLLFDMETSFDK;QLLFDMETSFDKFK;SEFSTVESFVEK;VINEGLTIEDR	1;1;1;1;1;1;1;1;1;1;1;1;1;1;1	15	17	0.7576	37852;49649;14914;24395;65788;8373;12130;9750;57807;63173;63172;65178;43142;42297;51959;38890;31671	-	Vacuolar protein sorting-associated protein 28 homolog OS=Echinococcus granulosus OX=6210 GN=EGR_02821 PE=3 SV=1	3.45288e+07	2.46634e+06
1528_1	tr|W6UBC1|W6UBC1_ECHGR	3.31108	NA	34707.3	IFVADFAK	1	1	1	0.0256	10837	-	Estradiol 17-beta-dehydrogenase OS=Echinococcus granulosus OX=6210 GN=EGR_09395 PE=3 SV=1	114921	10447.3
341_1	tr|W6UKH8|W6UKH8_ECHGR	3.95308	NA	62231.6	LTDIDPTFLK	1	1	1	0.0182	25611	tr|A0A068WX52|A0A068WX52_ECHGR	Atlastin-2 OS=Echinococcus granulosus OX=6210 GN=EGR_03647 PE=3 SV=1	0	0
45_1	tr|A0A068WET3|A0A068WET3_ECHGR	2.57359	NA	89008.2	AVFNLDLEQYR	1	1	1	0.0139	37794	tr|W6UX26|W6UX26_ECHGR	Glycerol-3-phosphate dehydrogenase OS=Echinococcus granulosus OX=6210 GN=EgrG_000964600 PE=3 SV=1	8.34092e+06	154462
1625_1	tr|U6JIM9|U6JIM9_ECHGR	109.191	NA	37280.3	AFKNPLR;AIYDHFK;AIYDHFKDVYNVSLVDFITK;DAYNNVIMSAVDLR;DLLDVLDSELSGDFGELAR;DVYNVSLVDFITK;EEDIIQVIGK;FISTHRPEYSAEQIK;GLGTREEDIIQVIGK;GNETEVTR;ILCTASVLDIR;KTGSAGGDVNDIICCLSPTEITALK;LAYFSK;LLLVAQLYNSMHGLGTDER;NLFLGPIQVLAFELYK;SAAAIHAAGEGK;SAAATGHWEDLIDMQQVER;SAYLEVLQYEDVK;SAYLEVLQYEDVKDK;SEIDLPTLK;SLLMTLLGEK;TGSAGGDVNDIICCLSPTEITALK;VLYQQK;YNKDLLDVLDSELSGDFGELAR	1;1;1;1;1;1;1;1;1;1;1;1;1;1;1;1;1;1;1;1;1;1;1;1	24	52	0.7523	7363;7362;9855;65248;65247;47614;47639;59745;59746;44999;45000;24377;53492;53488;53490;48764;10575;10629;31783;31782;67957;67956;67971;67955;1393;61106;61105;61132;55009;55008;20315;20317;20318;61638;61639;46885;46884;53333;53332;16439;16438;21829;22897;66597;66595;66564;66598;66593;66596;3874;66330;66339	-	Annexin OS=Echinococcus granulosus OX=6210 GN=EGR_00674 PE=3 SV=1	4.05099e+08	1.84136e+07
488_1	tr|A0A068WJ74|A0A068WJ74_ECHGR	11.0214	NA	159555	DYISADWK;GADPNVILER;LEYLSLAK;WFGHFFNK	1;1;1;1	4	4	0.0241	15574;20368;12353;20300	tr|W6UNX4|W6UNX4_ECHGR	Protein flightless 1 OS=Echinococcus granulosus OX=6210 GN=EgrG_000235000 PE=4 SV=1	777539	10367.2
1258_1	tr|W6UCB5|W6UCB5_ECHGR	5.315	NA	43097.1	LESLSTLAR;TADFIQLVNTLR	1;1	2	2	0.0538	15185;39035	tr|A0A068X097|A0A068X097_ECHGR	Syntaxin-5 OS=Echinococcus granulosus OX=6210 GN=EGR_06304 PE=3 SV=1	433154	19688.8
524_2	tr|A0A068WHV1|A0A068WHV1_ECHGR	45.5664	NA	20421	EFISLMR;EVPPTTIEEWK;FNDMDINCDGSLSKEEIR;LTVDELYEGLR;LTVDELYEGLRR;QCCEESNLPPSK;QCCEESNLPPSKVEEFINLFDNNGDSR;QEVVQIVHSADK;QEVVQIVHSADKDGDQSLTYK;VEEFINLFDNNGDSR;VTLDEYER	1;1;1;1;1;1;1;1;1;1;0	10	24	0.5909	9966;35673;35674;35671;35675;35677;61338;34535;42693;42692;41906;71705;37005;37007;36051;64878;64879;64666;64667;64877;64880;52518;52519;52517;16867	tr|W6UH73|W6UH73_ECHGR	16 kDa calcium binding protein OS=Echinococcus granulosus OX=6210 GN=EGR_04778 PE=4 SV=1	1.32744e+07	948171
524_1	tr|A0A068WPV8|A0A068WPV8_ECHGR	28.3861	NA	21851.8	ADISDFIK;AYTPEEK;CLEDSNLPK;EIPETTINDWK;FHLMDTDNNGELSTAEILQCLK;FYNMDTDR;TVDDNGDGVLTVDEFTALMR;VTLDEYER	1;1;1;1;1;1;1;0	7	9	0.4745	10743;6865;19860;36545;36547;67307;18954;61834;61833;16867	-	Calcium binding protein OS=Echinococcus granulosus OX=6210 GN=EGR_07814 PE=4 SV=1	2.47891e+07	1.90685e+06
1623_1	tr|A0A068WC89|A0A068WC89_ECHGR	4.21845	NA	13401.7	SLQIEQLLSAK	1	1	1	0.0917	29803	-	Zf-C3HC4_2 and Pfam-B_7383 and Pfam-B_16880 and Pfam-B_12017 and Pfam-B_10913 and Pfam-B_2478 and Pfam-B_3518 and Pfam-B_6278 domain containing protein OS=Echinococcus granulosus OX=6210 GN=EgrG_002015400 PE=4 SV=1	93362.4	13337.5
1621_1	tr|W6UNX1|W6UNX1_ECHGR	2.07442	NA	91542.5	LIDFIK	1	1	1	0.0073	2428	tr|A0A068WR59|A0A068WR59_ECHGR	PHD and RING finger domain-containing protein OS=Echinococcus granulosus OX=6210 GN=EGR_01866 PE=4 SV=1	40946.7	998.7
522_1	tr|A0A068WM02|A0A068WM02_ECHGR	3.57287	NA	41078.7	AILSLYSPVFK	1	1	1	0.0301	30360	tr|A9QUT6|A9QUT6_ECHGR;tr|W6UW51|W6UW51_ECHGR	Speckle type POZ protein OS=Echinococcus granulosus OX=6210 GN=EgrG_000558400 PE=4 SV=1	0	0
598_1	tr|W6USH6|W6USH6_ECHGR	14.2007	NA	132450	ALATGSGDCSVR;FSPDSR;GAVLVALFSPDAR;LVAGSDDNTLTLWTPEISK	1;1;1;1	4	4	0.0416	27602;451;34986;59681	tr|A0A068WG48|A0A068WG48_ECHGR	Notchless protein OS=Echinococcus granulosus OX=6210 GN=EGR_00767 PE=4 SV=1	2.764e+06	44580.7
1089_1	tr|A0A068W9U4|A0A068W9U4_ECHGR	34.3905	NA	26946.9	ADFEVGK;ENIFLSGTIR;INYTLPEHFYWSR;KADFEVGK;LGSTVLELR;MGEEPWYYLVMTAEPISSNASIK;STFVGLEPNTSYR;VIIESFGGR	1;1;1;1;1;1;1;1	8	11	0.3469	3203;24767;51390;51392;9859;15088;67900;67899;43045;42998;14542	-	Fibronectin type III domain-containing protein OS=Echinococcus granulosus OX=6210 GN=EgrG_000948400.1 PE=4 SV=1	3.61438e+07	2.40958e+06
1628_1	tr|U6J063|U6J063_ECHGR	150.667	NA	92021.6	AGLEAGDHDFTFDGFSIEACR;APAPAPVPVTVR;DEFWSALLEK;EPHEGPLDMNFFK;FDADNSGTMSTFELR;FGEWVEVVVDDR;FGEWVEVVVDDRLPTR;FNDYVICCAR;GFSLLCCGLGQK;GGSTIEALEDFTGGLAEYYDLR;GKQPADLFK;GMTYDEIK;GMTYDEIKNGLR;HPVPSSTGGQITAK;IAQVNSSSGPVQLLR;ILWEILR;KVPFEMTIIHGGWQPGVNAGGCR;LEMCALGPQSLSMDDSR;LFGSYESLR;LPPGTYVIVPSTFAK;NALNCAGYHIDNATLTSVVLR;NFLDTFWTNPQYR;NGNLIFMHSVDRDEFWSALLEK;NRVDVDLDSGASR;RHPVPSSTGGQITAK;RPQEICSNPK;SGSLDFE…	1;1;1;1;1;1;1;1;1;1;1;1;1;1;1;1;1;1;1;1;1;1;1;1;1;1;1;1;1;1;1;1;1;1;1	35	63	0.483	64268;64269;26414;26413;30330;46997;50459;41955;56378;56377;35127;35080;36257;65118;65119;15900;13404;39328;39326;39325;38428;38430;47294;47271;12679;66835;66842;66834;66843;66845;56197;19591;47841;47842;47840;47839;64078;64108;64105;64079;64104;50794;50828;67988;67986;39683;39681;46065;46064;46063;29724;25311;24671;10639;7863;23679;65199;65210;68111;68105;24705;3968;3962	-	Calpain-A OS=Echinococcus granulosus OX=6210 GN=EGR_00412 PE=3 SV=1	1.90964e+08	3.97843e+06
992_1	tr|W6UG37|W6UG37_ECHGR	2.94838	NA	135888	IEIKPENSPK	1	1	1	0.0079	25111	tr|A0A068X313|A0A068X313_ECHGR	Receptor-type tyrosine-protein phosphatase F OS=Echinococcus granulosus OX=6210 GN=EGR_08040 PE=4 SV=1	99328.6	2309.97
1402_1	tr|A0A068X070|A0A068X070_ECHGR	12.4714	NA	46170.6	AIESLTTGFK;LHLIQPK;LQAQNDAVNLLCQVK;QALAMSMQVGPASSSGASGPVDLTNMTEEEQIAYAIQMSMQTQEQER	1;1;1;1	4	4	0.1841	19284;7544;51121;75099	-	26S proteasome non-ATPase regulatory subunit 4 OS=Echinococcus granulosus OX=6210 GN=EGR_08704 PE=3 SV=1	558342	29386.4
1400_1	tr|A0A068WFQ4|A0A068WFQ4_ECHGR	5.25985	NA	206509	SCNLEVAELLLTHGAAVDAK	1	1	1	0.0104	60709	tr|W6UNE7|W6UNE7_ECHGR	Ankyrin OS=Echinococcus granulosus OX=6210 GN=EgrG_000638400 PE=4 SV=1	0	0
990_1	tr|W6UKD0|W6UKD0_ECHGR	85.3514	NA	110914	AFLGPLK;AGMTHVVR;AHIMEIQVNGGTVSQK;EENKELAALIKPK;ELAALIKPK;EVVEPVTILECPPMVIVGIVGYAHTAR;GCCMGPR;GNASTEYDLTAK;IGLGVQAQIEAAK;KAHIMEIQVNGGTVSQK;KSLLQQTSR;KVACIGAWHPAR;QVPVANVFAQDEMIDVIGVTK;TIWAEHLSEECR;VACIGAWHPAR;VIAHTQMR;VNVEEATER;WADEAGLAAINSDIK;WADEAGLAAINSDIKK	1;1;1;1;1;1;1;1;1;1;1;1;1;1;1;1;1;1;1	19	23	0.1931	2294;8657;51098;43589;43590;43591;14825;70630;6856;32269;33962;54414;18945;37713;37715;63544;63213;45808;30334;13372;17989;47392;50810	-	Glutathione synthase OS=Echinococcus granulosus OX=6210 GN=EGR_03582 PE=3 SV=1	2.53733e+07	437470
1306_1	tr|W6UDH7|W6UDH7_ECHGR	56.699	NA	26065	APVSGDLAQPDGPFIQR;CCGIFSLPWK;DYTAPTTEQPPKPHFGK;ILDDDRETEMEQNLHHVSGIVGELR;KAPVSGDLAQPDGPFIQR;KTDESLESTR;LDEIASK;LNAAQSQATR;MVTMAEESHQIGAATMEQLYHQGEQLDR;NLDTLEK;TDESLESTR;TMALDMNQEIAVHNQK;VNDQMNVIHEDIK	1;1;1;1;1;1;1;1;1;1;1;1;1	13	21	0.694	52466;32171;56321;56322;56324;56323;70373;70377;55786;55785;25774;3714;18904;71723;71722;6657;17546;54462;54463;46791;46793	tr|A0A068X1M4|A0A068X1M4_ECHGR	Synaptosomal-associated protein 25-A OS=Echinococcus granulosus OX=6210 GN=EGR_08747 PE=4 SV=1	2.64026e+07	1.46681e+06
49_1	tr|U6J7Y0|U6J7Y0_ECHGR	41.2185	NA	42164.1	ALHAGLALSTDDLPIK;AVQNPSILDACDIDAK;EMLLQDIR;KYAGQGGSHEAFR;NSIEEQEGSFK;QLEELEDANK;RVPLEETHVCQDR;SQLEGLCAK;TVWFFDK;VVSDTEEADFQR	1;1;1;1;1;1;1;1;1;1	10	11	0.3083	48971;48972;51478;16533;39851;32167;27341;49066;15972;12654;39248	-	Eukaryotic translation initiation factor 2 subunit 1 OS=Echinococcus granulosus OX=6210 GN=EGR_02841 PE=3 SV=1	6.19295e+06	281498
592_1	tr|W6US36|W6US36_ECHGR	30.4741	NA	14348.7	EYTINLHK;EYTINLHKR;FYTLVSYVPCSDFK;GKQNINVEPEK;IHGVGFK;LNEFLWSK;MMGTDDVR;QNINVEPEK	1;1;1;1;1;1;1;1	8	9	0.4711	16529;26323;51389;31484;31493;2807;17508;11652;19508	-	60S ribosomal protein L31 OS=Echinococcus granulosus OX=6210 GN=EGR_01538 PE=3 SV=1	1.24111e+07	1.77302e+06
1083_1	tr|D1MH21|D1MH21_ECHGR	2.39148	NA	7494.88	ELKDFFLLAR	1	1	1	0.1515	31256	tr|Q1EQ65|Q1EQ65_ECHGR;tr|U6JQF8|U6JQF8_ECHGR	Antigen B 5/1 (Fragment) OS=Echinococcus granulosus OX=6210 GN=AgB5/1 PE=4 SV=1	0	0
302_1	tr|U6JFD4|U6JFD4_ECHGR	5.1361	NA	20939.4	IYIIFK;VIFDLVK	1;1	2	2	0.0734	4766;6728	-	Tegument antigen OS=Echinococcus granulosus OX=6210 GN=EGR_03119 PE=4 SV=1	807889	62145.3
1081_1	tr|W6UAG1|W6UAG1_ECHGR	16.9602	NA	56826.3	ALADYAAANR;DITAADEQQAAAHK;NDYGFR;TADENLLLSNQR;TNLPEFK	1;1;1;1;1	5	5	0.0976	17450;42914;3435;38143;7514	tr|A0A068WW65|A0A068WW65_ECHGR	Sorting nexin-6 OS=Echinococcus granulosus OX=6210 GN=EGR_06790 PE=3 SV=1	3.2025e+06	118611
590_1	tr|U6J9Z2|U6J9Z2_ECHGR	28.9436	NA	23369.8	AHGNDLIHK;GFSLEELR;IILFNNAK;ILPVPCHQGEK;NGLPSIR;RVAPKPACGPLRPIVNCPTLR;SIGIAVDHR;VAPKPACGPLRPIVNCPTLR;YSAFHAIR	1;1;1;1;1;1;1;1;1	9	11	0.403	15935;13119;12253;12160;12208;32720;2757;65043;14031;62640;13868	-	60S ribosomal protein L13 OS=Echinococcus granulosus OX=6210 GN=EGR_07290 PE=3 SV=1	1.42031e+07	1.09255e+06
1195_1	tr|A0A068WF10|A0A068WF10_ECHGR	101.702	NA	52262	AIHTDLHK;ECISITETFYGK;EKPLTIYVFASDSEVIK;ETMQLLDK;FDHVFYTGGMNAAR;FIELTIVK;FNNLFR;GEVVYGGK;GLSAGQTCVAPDYVLCHAK;HLTPVTLELGGK;KEKPLTIYVFASDSEVIK;KMEESADFAR;LECLECEILPLK;LEITNLIHNLDDWAGEK;LSSLLQSTR;MEESADFAR;NLPFGGVGNSGTGR;SPVYVDASADLALTAK;TFLSLFDTVSIQPQPLGR;TMLTDNEEELCR;TTSGSIVFNDCIMQLGVR;VLDNFIK;YFGQASIDAFSNPR;YPPYTESSEK	1;1;1;1;1;1;1;1;1;1;1;1;1;1;1;1;1;1;1;1;1;1;1;1	24	33	0.5782	12251;41858;56922;56923;14527;47725;47742;13781;5501;5374;59425;59426;32048;32049;59830;26983;45181;57866;57867;15947;18518;35895;35947;48620;58831;58830;44870;58264;7528;7579;47352;28039;28038	-	Aldehyde dehydrogenase OS=Echinococcus granulosus OX=6210 GN=EgrG_000608100 PE=3 SV=1	2.76487e+07	1.06341e+06
187_1	tr|W6UX30|W6UX30_ECHGR	2.55438	NA	121764	AGLAIFR	1	1	1	0.0064	2393	tr|A0A068X0Y0|A0A068X0Y0_ECHGR	Macrophage mannose receptor OS=Echinococcus granulosus OX=6210 GN=EGR_07089 PE=4 SV=1	20215.8	396.387
1120_1	tr|W6UW11|W6UW11_ECHGR	14.7381	NA	11038.8	DLLHPTLAEEK;DLLHPTLAEEKR;LVPSPNSYFMDVK	1;1;1	3	3	0.2525	32075;40592;44218	tr|A0A068X4L2|A0A068X4L2_ECHGR	40S ribosomal protein S27 OS=Echinococcus granulosus OX=6210 GN=EGR_07471 PE=3 SV=1	4.63078e+06	661541
485_1	tr|A0A068WJ15|A0A068WJ15_ECHGR	8.63932	NA	35800.3	GSPTTVTFLPLSELK;LLTQTLLEAAK	1;1	2	2	0.0807	47838;28116	tr|W6ULX1|W6ULX1_ECHGR	Cellular senescence inhibited protein OS=Echinococcus granulosus OX=6210 GN=EgrG_001036100 PE=4 SV=1	34003.8	1789.68
[truncated: 778 more rows]

## Sheet: Table S2
Table S2 related to Fig 4. Single-cell RNA sequencing data statistics
[truncated: 10 more rows]

## Sheet: Table S3
Table S3 related to Fig. 4. Comparative analysis of co-regulated DEGs in the PSC-sEV treated group and HC-infected group
[truncated: 7 more rows]
